# Supplementary material for: Switchable light vs. acid-induced transformations of complex framework compounds at room temperature
Source: Royal Society of Chemistry journal article supplement (doi:10.1039/d1gc04815e), 2022-01-01

Electronic Supplementary Material (ESI) for Green Chemistry.

This journal is © The Royal Society of Chemistry 2020

## Supporting Information

### Switchable light vs acid-induced transformations of complex framework compounds at room temperature

Maxim S. Kobzev,<sup>a</sup> Alexander A. Titov,<sup>a\*</sup> Tatiana N. Borisova,<sup>a</sup> Leonid G. Voskressensky,<sup>a</sup> Alexey V. Varlamov,<sup>a</sup> Massimo Christian D'Alterio,<sup>b</sup> Alessio Petrone,<sup>b,c</sup> Rafael Luque,<sup>\*a,d</sup> and Giovanni Talarico<sup>\*b,c</sup>

<sup>a</sup> Organic Chemistry Department, Peoples' Friendship University of Russia (RUDN University), 6 Miklukho-Maklaya St, Moscow, 117198, Russian Federation

<sup>b</sup> Department of Chemical Sciences, Università degli Studi di Napoli Federico II, via Cintia, 80126 Napoli, Italy

<sup>c</sup> Scuola Superiore Meridionale, Largo San Marcellino 10, I-80138, Napoli, Italy

<sup>d</sup> Departamento de Química Orgánica, Universidad de Córdoba, Campus de Rabanales, Edificio Marie Curie (C-3), Ctra Nnal IV-A, Km 396, Córdoba, Spain

Email: [titov-aa@rudn.ru](mailto:titov-aa@rudn.ru); [rafael.luque@uco.es](mailto:rafael.luque@uco.es); [giovanni.talarico@unina.it](mailto:giovanni.talarico@unina.it)

## Table of Contents

|                                                             |    |
|-------------------------------------------------------------|----|
| 1. Proposed mechanisms of reactions.....                    | S3 |
| 2. Computational Details.....                               | S4 |
| 3. Supplementary Figures                                    |    |
| Figures S1-S2.....                                          | S5 |
| Figures S3-S4.....                                          | S6 |
| Figure S5.....                                              | S7 |
| 4. References.....                                          | S8 |
| 5. Appendix                                                 |    |
| Copies of $^1\text{H}$ and $^{13}\text{C}$ NMR spectra..... | S9 |

## 1. Proposed mechanisms of reactions.

Based on<sup>[1]</sup>, it can be suggested that, initially, under irradiation with UV at a wavelength of 365 nm, as a result of the cleavage of the C<sub>3</sub>–C<sub>3a</sub> bond, a biradical **I** is generated. Then it is isomerized into a biradical **II**, from which a cyclopropane ring is formed (**Scheme S1**).

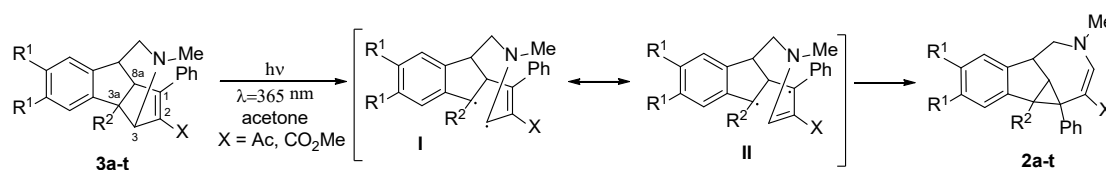

**Scheme S1.** A proposed mechanism for the forward rearrangement of cyclopentenes **3** into vinylcyclopropanes **2**.

In a trifluoroacetic acid medium at room temperature, 2-azabenzo[*a*]cyclopropano[*cd*]azulenes **2a,d,g,k** are converted back to (epiminomethano)cyclopenta[*a*]indenes **3a,d,g,k** in 69-73% yields (**Scheme S2**). We assume that the first step of this transformation is the addition of a proton to the enamine fragment of the molecules of the cyclopropane derivatives **2a,d,g,k**, which leads to the formation of cation **III**, which undergoes transformation into a cation-biradical **IV**. Intermediate **IV** is isomerized to **V**, the recombination of which and subsequent elimination of the proton leads to the target products.

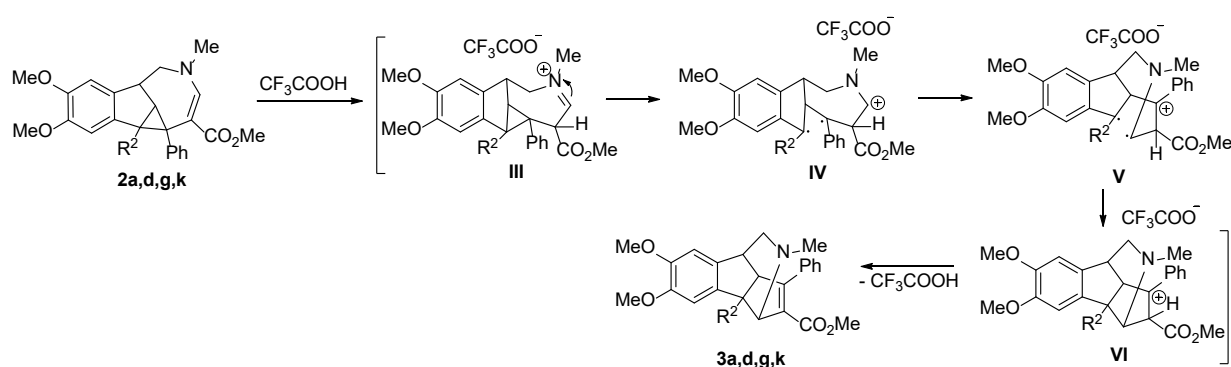

**Scheme S2.** A proposed mechanism for the reverse transformation of vinylcyclopropanes **2** into cyclopentenes **3** at room temperature.

Further, the proposed mechanisms reported in **Scheme S1** and **S2** was investigated in detail by using DFT calculations.

## 2. Computational Details

DFT static calculations have been performed with Gaussian09 and Gaussian16 set of programs<sup>[2]</sup> using the B3LYP functional of Becke and Perdew<sup>[3]</sup> for the closed shell systems and UB3LYP for the open shell systems. The geometry optimization has been described with the 6-31G(d) basis set and stationary points were characterized using vibrational analysis, and this analysis has been also used to calculate zero-point energies and thermal (enthalpy and entropy) corrections (298.15 K, 1 bar). Improved electronic energies has been obtained from single-point energy calculations using a 6-311G++(d,p) basis set, a solvation contribute (PCM model,<sup>[4]</sup> acetone for **3-2** and acetonitrile for **2-3** reactions, respectively) and dispersion corrections<sup>[5]</sup> (EmpiricalDispersion=GD3BJ in Gaussian package). These energies added to the 6-31G(d)-level thermal corrections are named  $\Delta G$ . It is well-known that open-shell systems place additional challenges to DFT, due to: (i) the spin-contamination problem; (ii) numerical instability in the exchange-correlation (XC) kernel; (iii) the single-determinant description of open-shell ground states can soon be inaccurate and energetically unstable.<sup>[6]</sup> Linear-response time-dependent density functional theory (TDDFT) along with multireference methods (i.e., complete active space self-consistent field or CASSCF, multireference configuration interaction or MRCI, complete active space with second-order perturbation theory or CASPT2) can provide more accurate results for activation energies. TDDFT, indeed, can partially overcome these well-known limitations with a reduced computational cost with respect to post-Hartree-Fock methods, since low lying triplet states can be obtained as linear combination of one particle excitations. On the other hand, electronic correlation and orbital relaxations are treated in a more accurate way with TDDFT with respect to converging an unrestricted DFT ground state triplet.<sup>[6,7]</sup> Thus, the electronic structures of triplet species for the transformation of **3a-2a** (Figure S1) and **3s-2s** (Figure S4) were corrected using the TDDFT within the linear-response framework.<sup>[8,9,10]</sup> These additional analysis on these triplet states were also made possible at TDDFT level relying on the recent development and implementation of analytic expressions for higher-order TDDFT properties using the most recent version of Gaussian electronic structure package G16.C01,<sup>[2]</sup> such as the TDDFT Hessians.<sup>[11,12]</sup>

### 3. Supplementary Figures

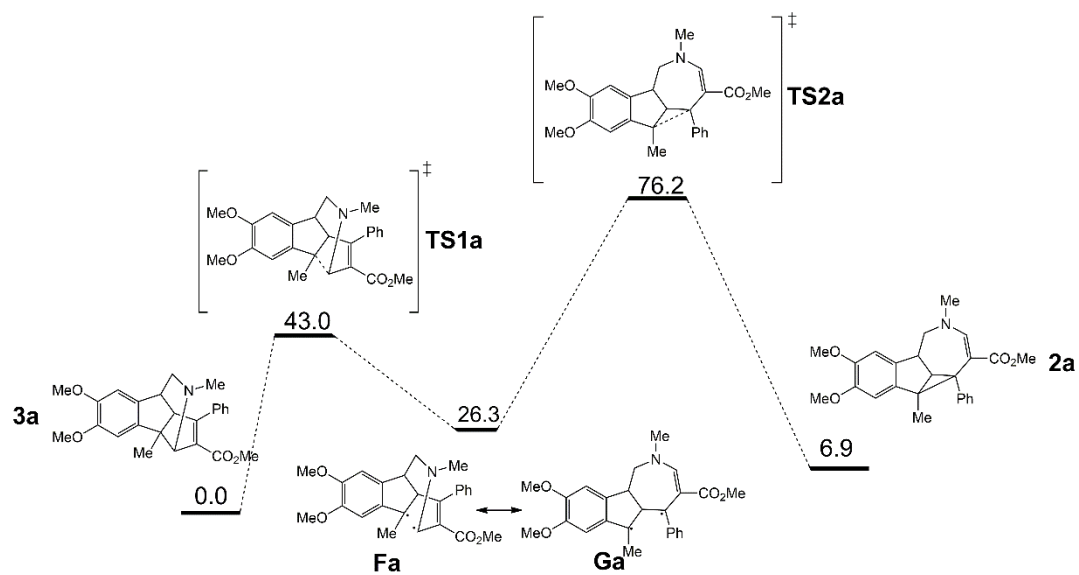

Figure S1. Gibbs energies (kcal/mol) for 3a-2a light-transformation obtained by DFT and TDDFT calculations.

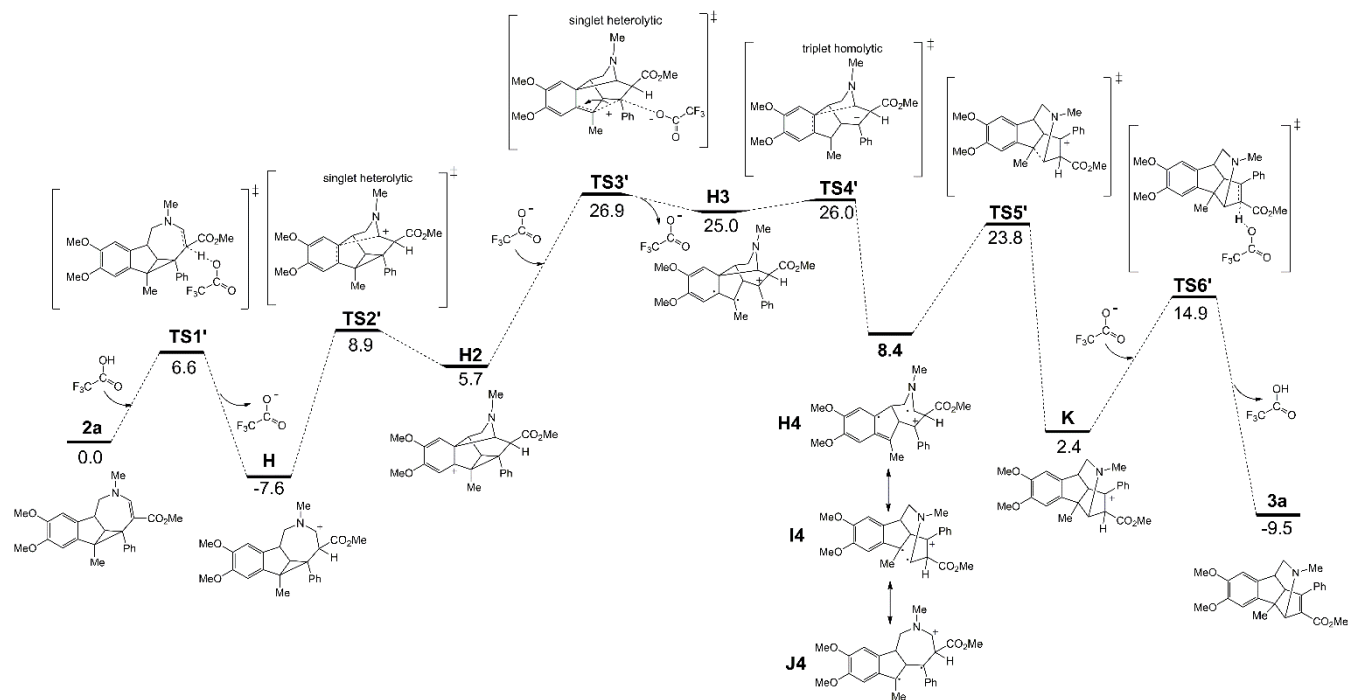

Figure S2. Gibbs energies (kcal/mol) for reaction path acid-catalyzed 2a-3a obtained by DFT calculations.

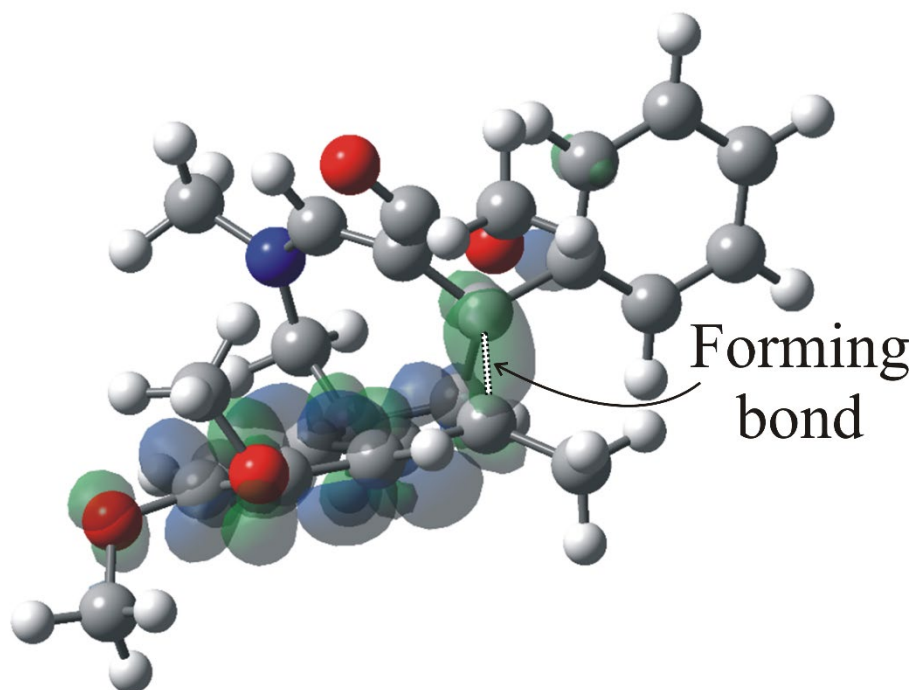

**Figure S3.** Spin density (difference between  $\alpha$  and  $\beta$  densities, green and blue as positive and negative, respectively) iso-surface of **TS2a**. Generalized spin density corresponding to the excited state energy calculated at TD-B3LYP/6-311++G(d,p) (implicit solvent) was employed.

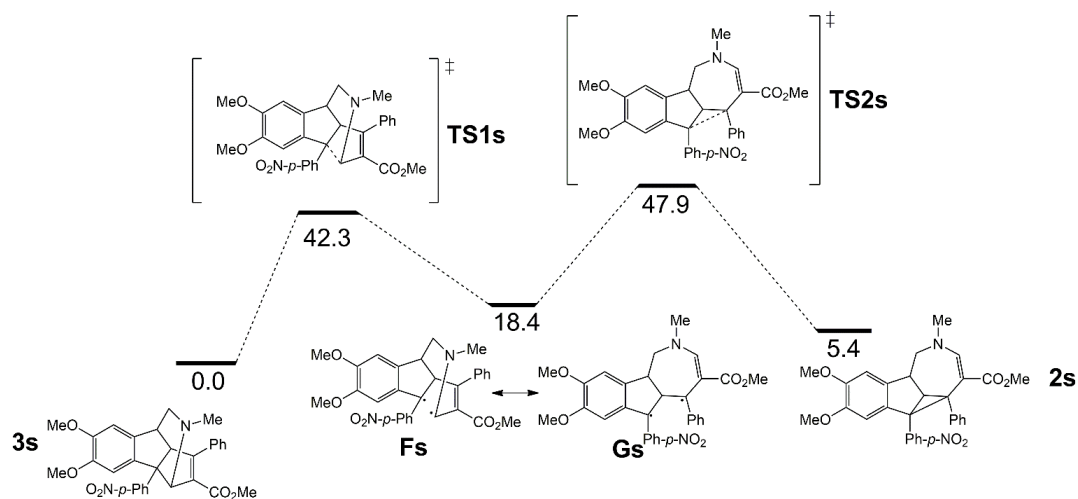

**Figure S4.** Gibbs energies (kcal/mol) for **3s-2s** light-transformation obtained by DFT and TDDFT calculations.

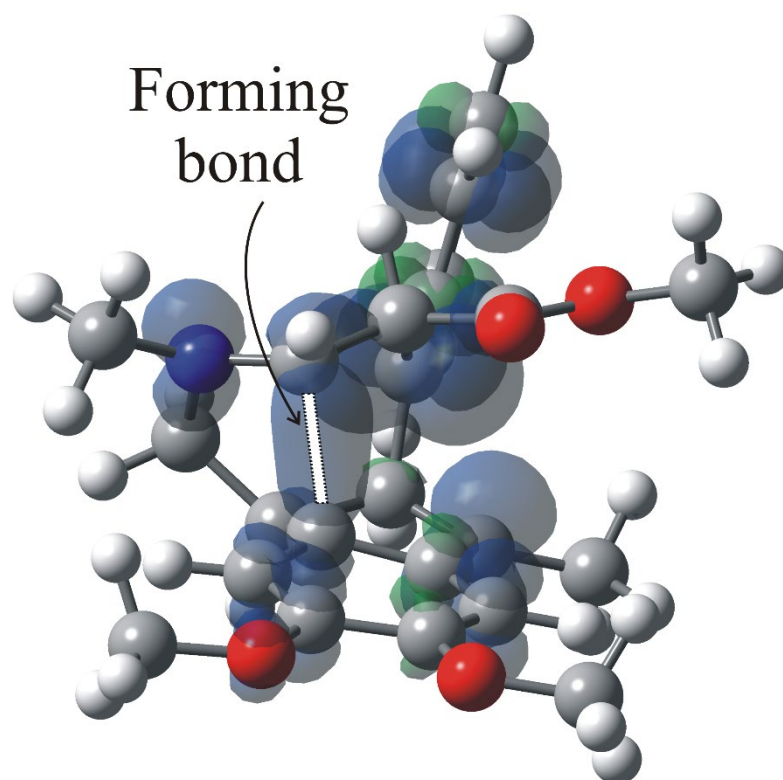

**Figure S5.** Spin density (difference between  $\alpha$  and  $\beta$  densities, green and blue as positive and negative, respectively) iso-surface of TS4' reported in Figure S2. Spin density corresponding to the energy calculated for unrestricted triplet B3LYP/6-311++G(d,p) (implicit solvent) was employed.

## 4. References

- (1) K. G. Maskill, Knowles J. P., L. D. Elliott, R. W. Alder, K. I. Booker-Milburn, Complexity from simplicity: tricyclic aziridines from the rearrangement of pyrroles by batch and flow photochemistry, *Angew. Chem. Int. Ed.* 2013, **52**, 1499–1502.
- (2) M. J. Frisch, G. W. Trucks, H. B. Schlegel, G. E. Scuseria, M. A. Robb, J. R. Cheeseman, G. Scalmani, V. Barone, G. A. Petersson, H. Nakatsuji, X. Li, M. Caricato, A. V. Marenich, J. Bloino, B. G. Janesko, R. Gomperts, B. Mennucci, H. P. Hratchian, J. V. Ortiz, A. F. Izmaylov, J. L. Sonnenberg, Williams, F. Ding, F. Lipparini, F. Egidi, J. Goings, B. Peng, A. Petrone, T. Henderson, D. Ranasinghe, V. G. Zakrzewski, J. Gao, N. Rega, G. Zheng, W. Liang, M. Hada, M. Ehara, K. Toyota, R. Fukuda, J. Hasegawa, M. Ishida, T. Nakajima, Y. Honda, O. Kitao, H. Nakai, T. Vreven, K. Throssell, J. A. Montgomery Jr., J. E. Peralta, F. Ogliaro, M. J. Bearpark, J. J. Heyd, E. N. Brothers, K. N. Kudin, V. N. Staroverov, T. A. Keith, R. Kobayashi, J. Normand, K. Raghavachari, A. P. Rendell, J. C. Burant, S. S. Iyengar, J. Tomasi, M. Cossi, J. M. Millam, M. Klene, C. Adamo, R. Cammi, J. W. Ochterski, R. L. Martin, K. Morokuma, O. Farkas, J. B. Foresman, D. J. Fox, Wallingford, CT, 2016.
- (3) a) A. D. Becke, A new mixing of Hartree–Fock and local density-functional theories, *The Journal of chemical physics*, 1993, **98**(2), 1372-1377; b) D. J. Becke, Density-functional thermochemistry. III. The role of exact exchange, *Chem. Phys.* 1993, **98**, 5648-5652; c) C. Lee, W. Yang, R. G. Parr, Development of the Colle-Salvetti correlation-energy formula into a functional of the electron density, *Phys. Rev. B*, 1988, **37**, 785-789.
- (4) V. Barone, M. Cossi, Quantum calculation of molecular energies and energy gradients in solution by a conductor solvent model. *J. Phys. Chem. A*, 1998, **102**, 1995-2001.
- (5) a) S. Grimme, Accurate description of van der Waals complexes by density functional theory including empirical corrections, *J. Comput. Chem.*, 2004, **12**, 1463-1473; b) S. Grimme, J. Antony, S. Ehrlich, H. Krieg, A consistent and accurate ab initio parametrization of density functional dispersion correction (DFT-D) for the 94 elements H-Pu, *J. Chem. Phys.*, 2010, **132**, 154104.
- (6) Z. Li, W. Liu, Critical assessment of time-dependent density functional theory for excited states of open-shell systems: II. Doublet-quartet transitions, *J. Chem. Theory Comput.*, 2016, **12**, 2517-2527.
- (7) P. Elliott, F. Furche, K. Burke, In *Excited states from time-dependent density functional theory* (Wiley, Hoboken, NJ, 2009), 91–165.
- (8) M. E. Casida, Time-Dependent Density Functional Response Theory for Molecules, *Recent Advances in Density Functional Methods* 1995, 155-192.
- (9) A. Dreuw, M. Head-Gordon, Single-reference ab initio methods for the calculation of excited states of large molecules, *Chem. Rev.*, 2005, **105**, 4009-4037.
- (10) R. E. Stratmann, G. E. Scuseria, M. J. Frisch, An efficient implementation of time-dependent density-functional theory for the calculation of excitation energies of large molecules, *J. Chem. Phys.*, 1998, **109**, 8218-8224.
- (11) J. Liu, W. Liang, Analytical approach for the excited-state Hessian in time-dependent density functional theory: Formalism, implementation, and performance, *J. Chem. Phys.*, 2011, **135**, 184111.
- (12) A. Petrone, D. B. Lingerfelt, D. B. Williams-Young, X. Li, Ab initio transient vibrational spectral analysis, *J. Phys. Chem. Lett.*, 2016, **7**, 4501-4508.



## 5. Appendix

- Copies of  $^1\text{H}$  and  $^{13}\text{C}$  NMR spectra

1-[5,6-Dimethoxy-3a,10-dimethyl-1-phenyl-3,3a,8,8a-tetrahydro-3,8-(epiminomethano)cyclopenta[a]inden-2-yl]ethanone (3b)

<sup>1</sup>H NMR spectra for 3b.

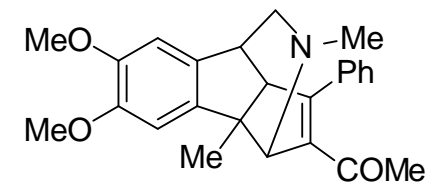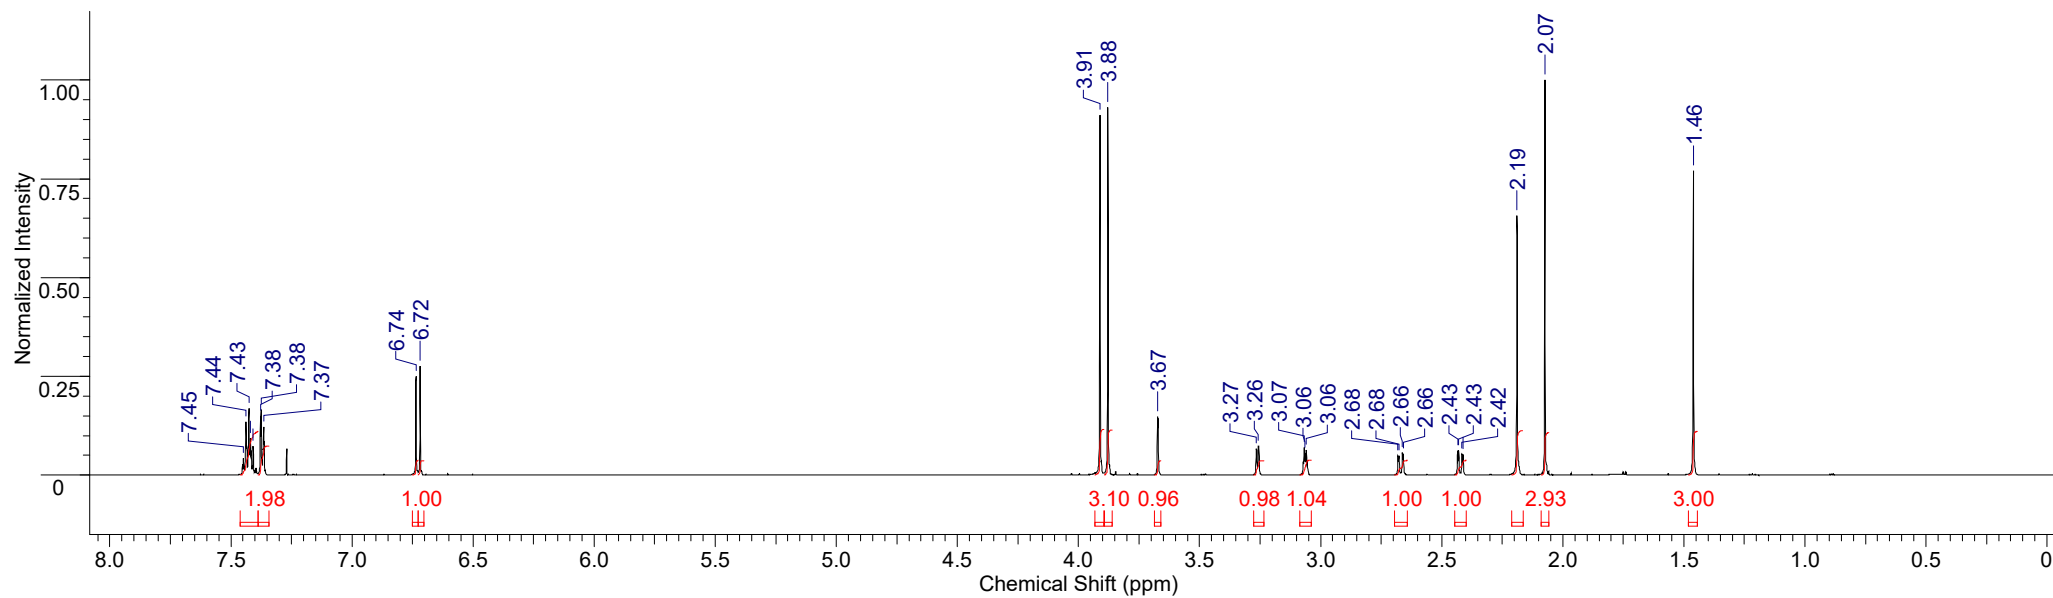

<sup>1</sup>H NMR spectra for 3b.

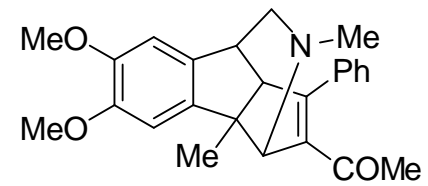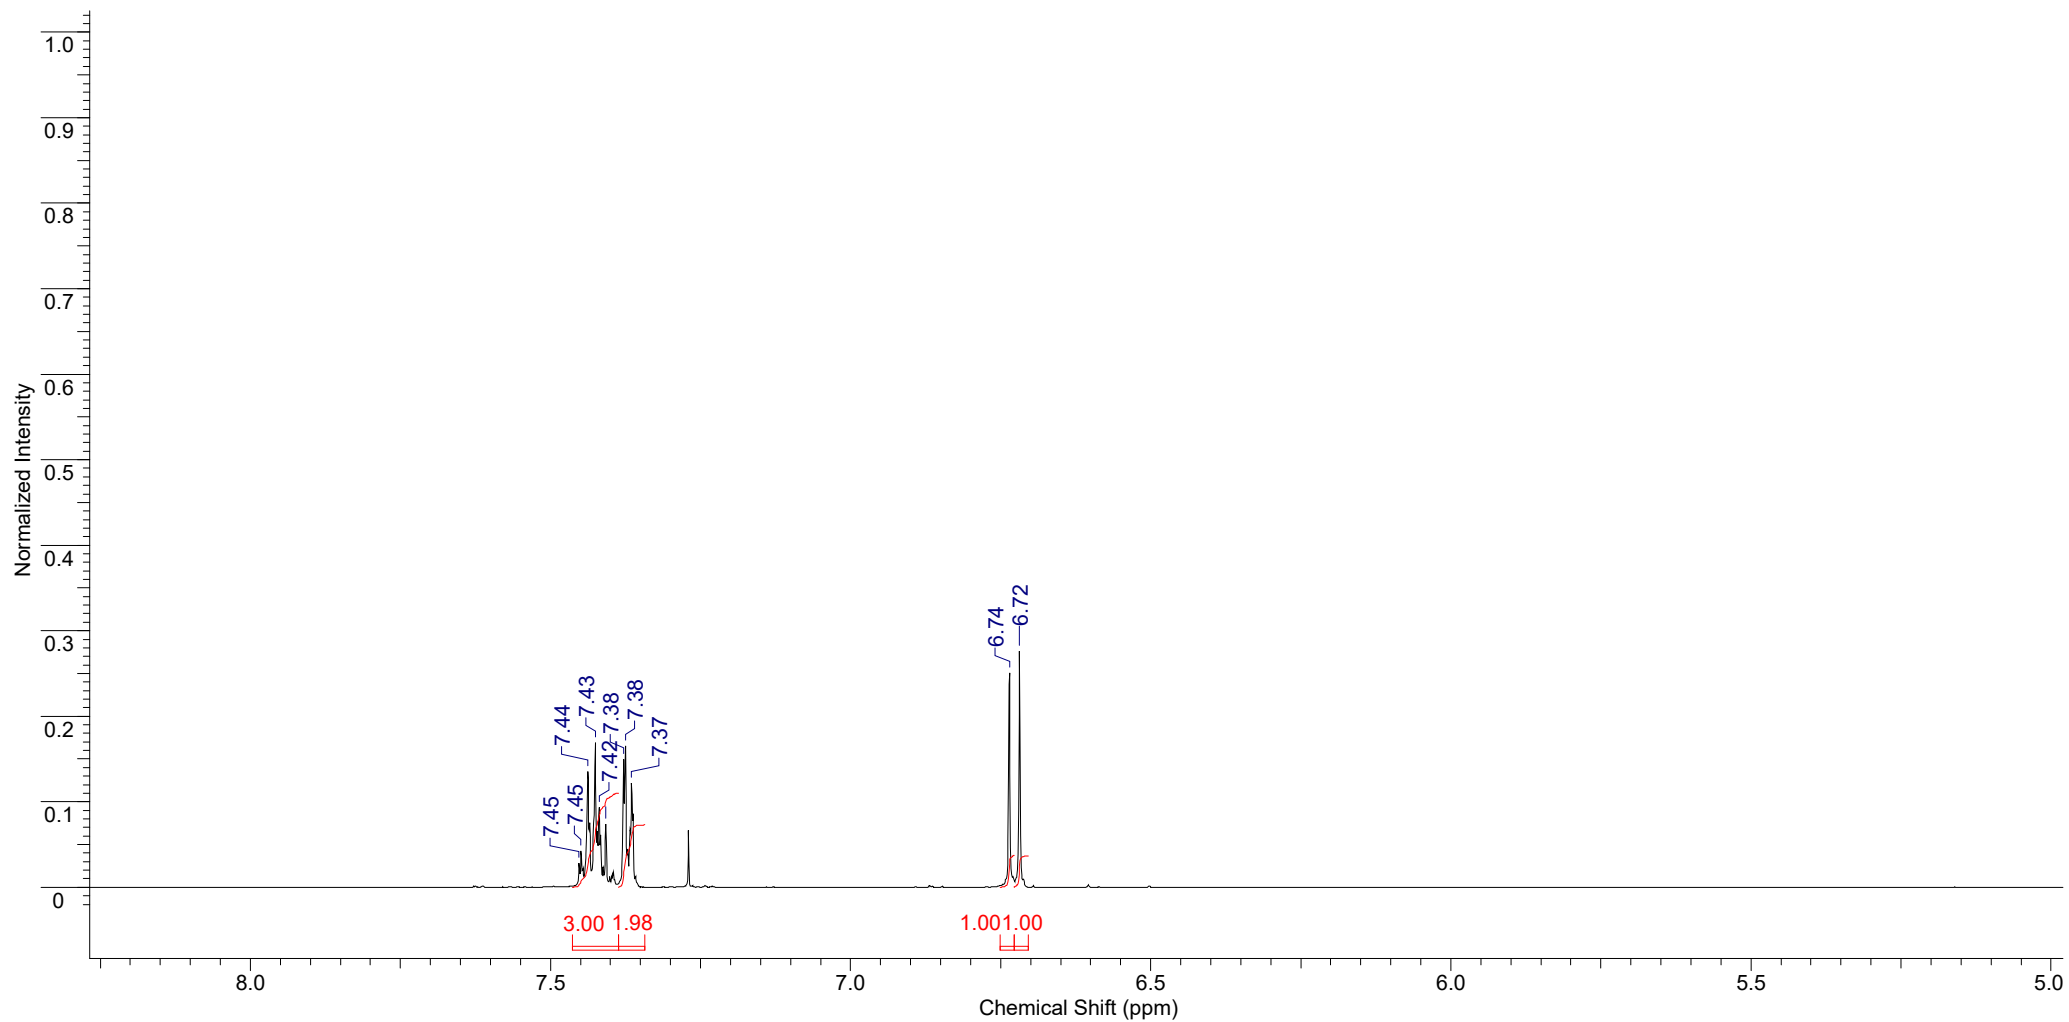

<sup>1</sup>H NMR spectra for 3b.

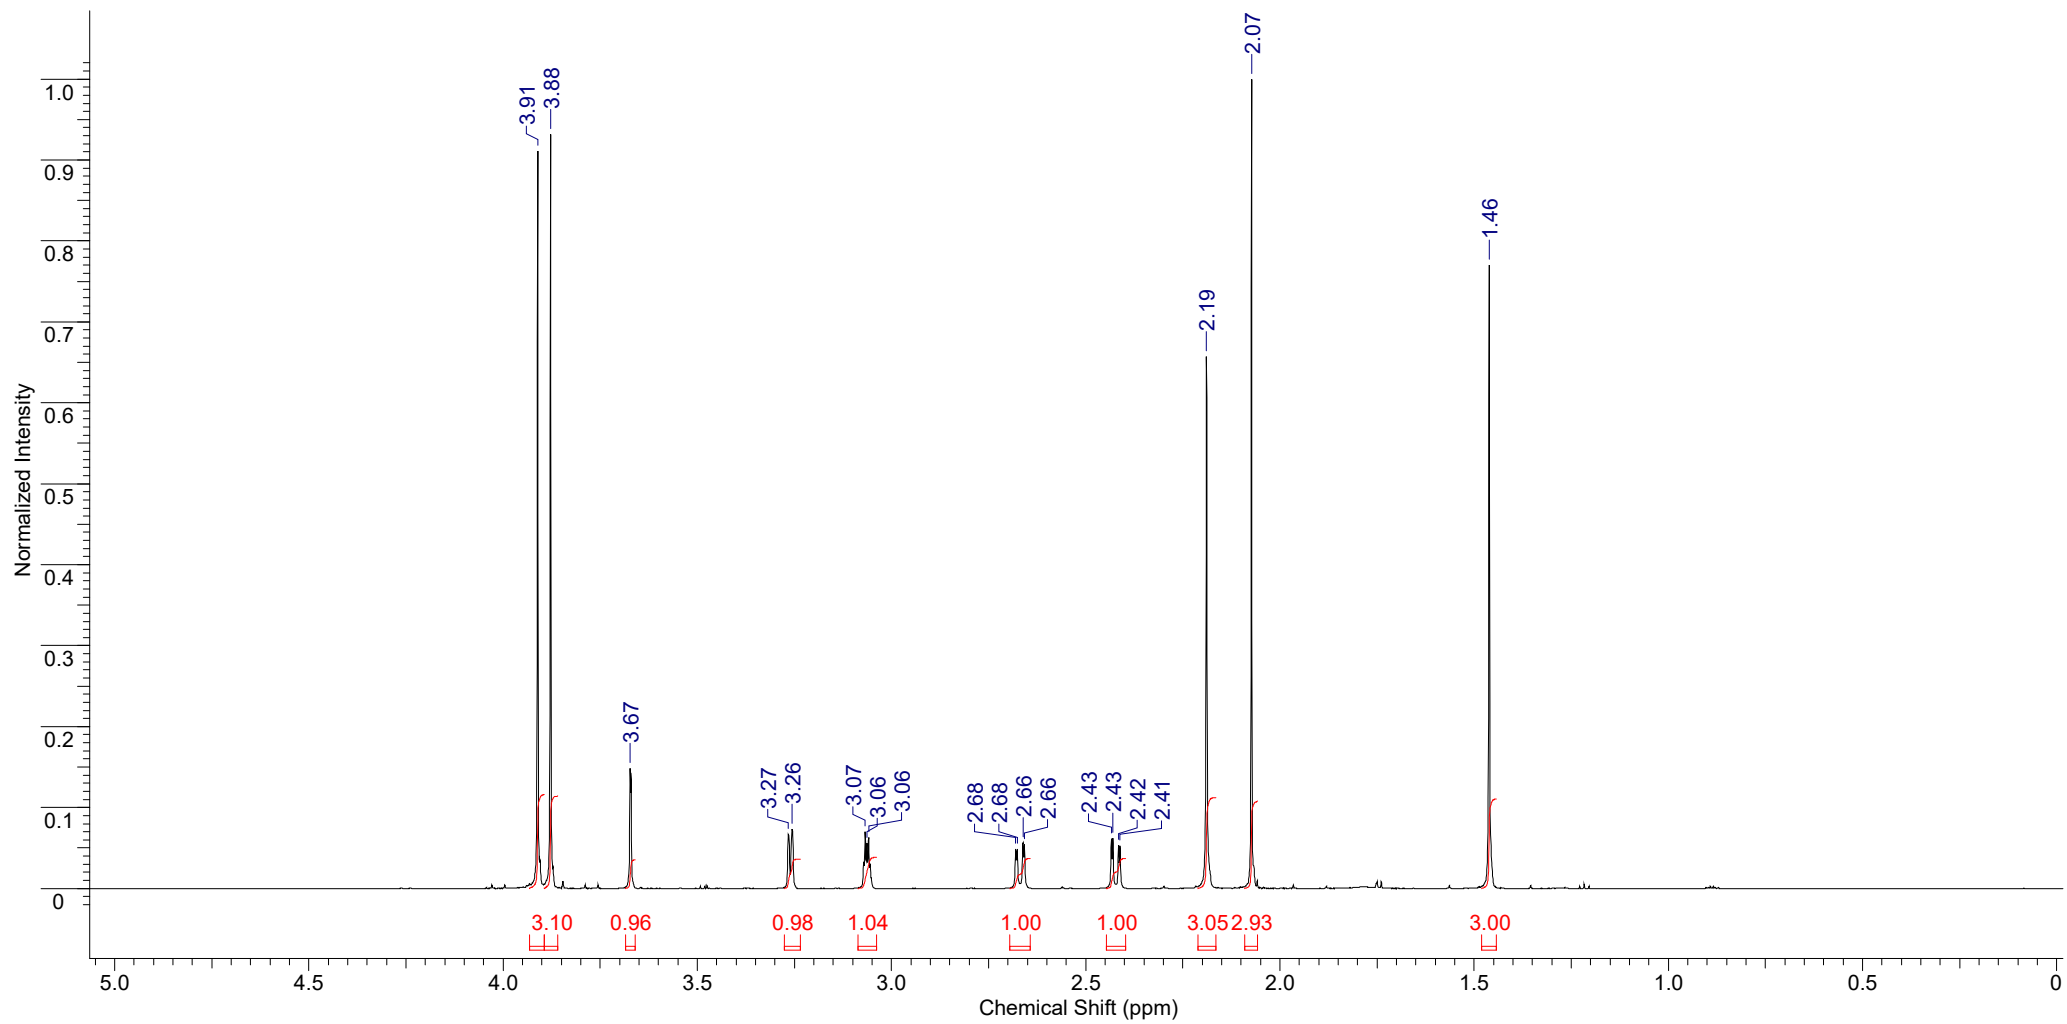

<sup>13</sup>C NMR spectra for 3b.

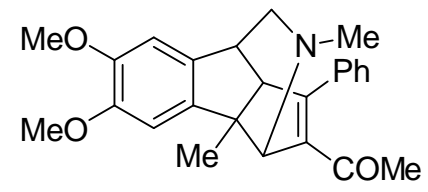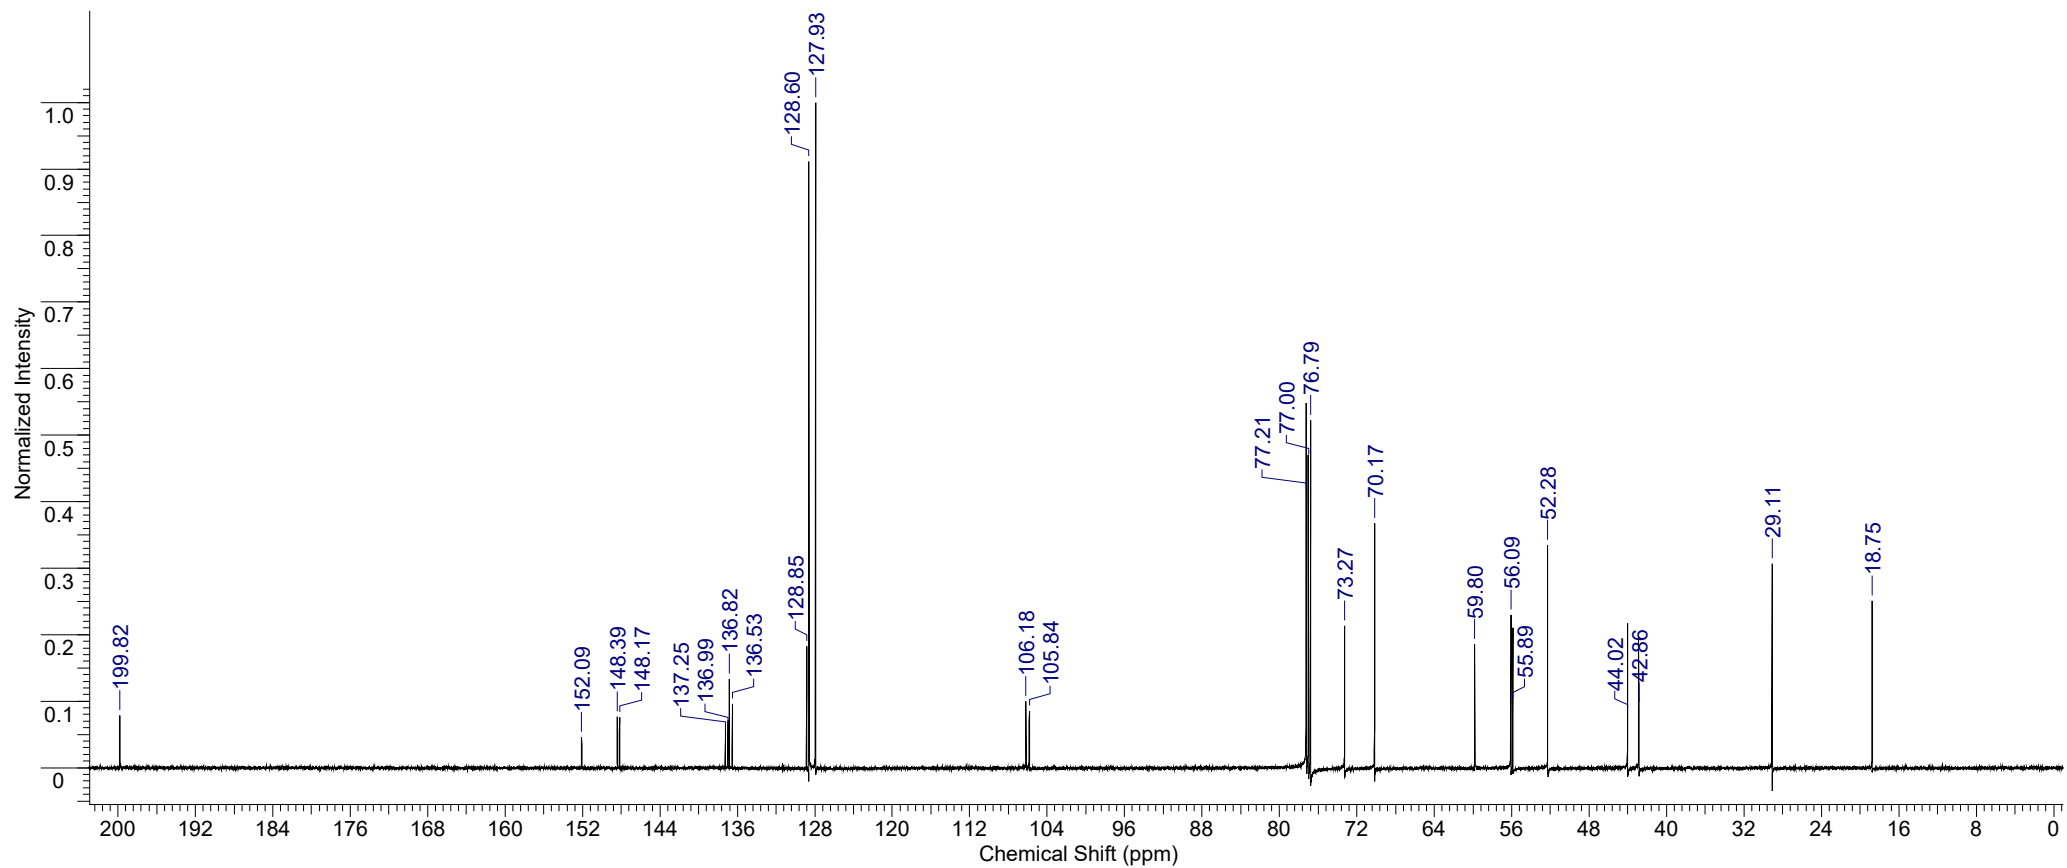

<sup>13</sup>C NMR spectra for 3b.

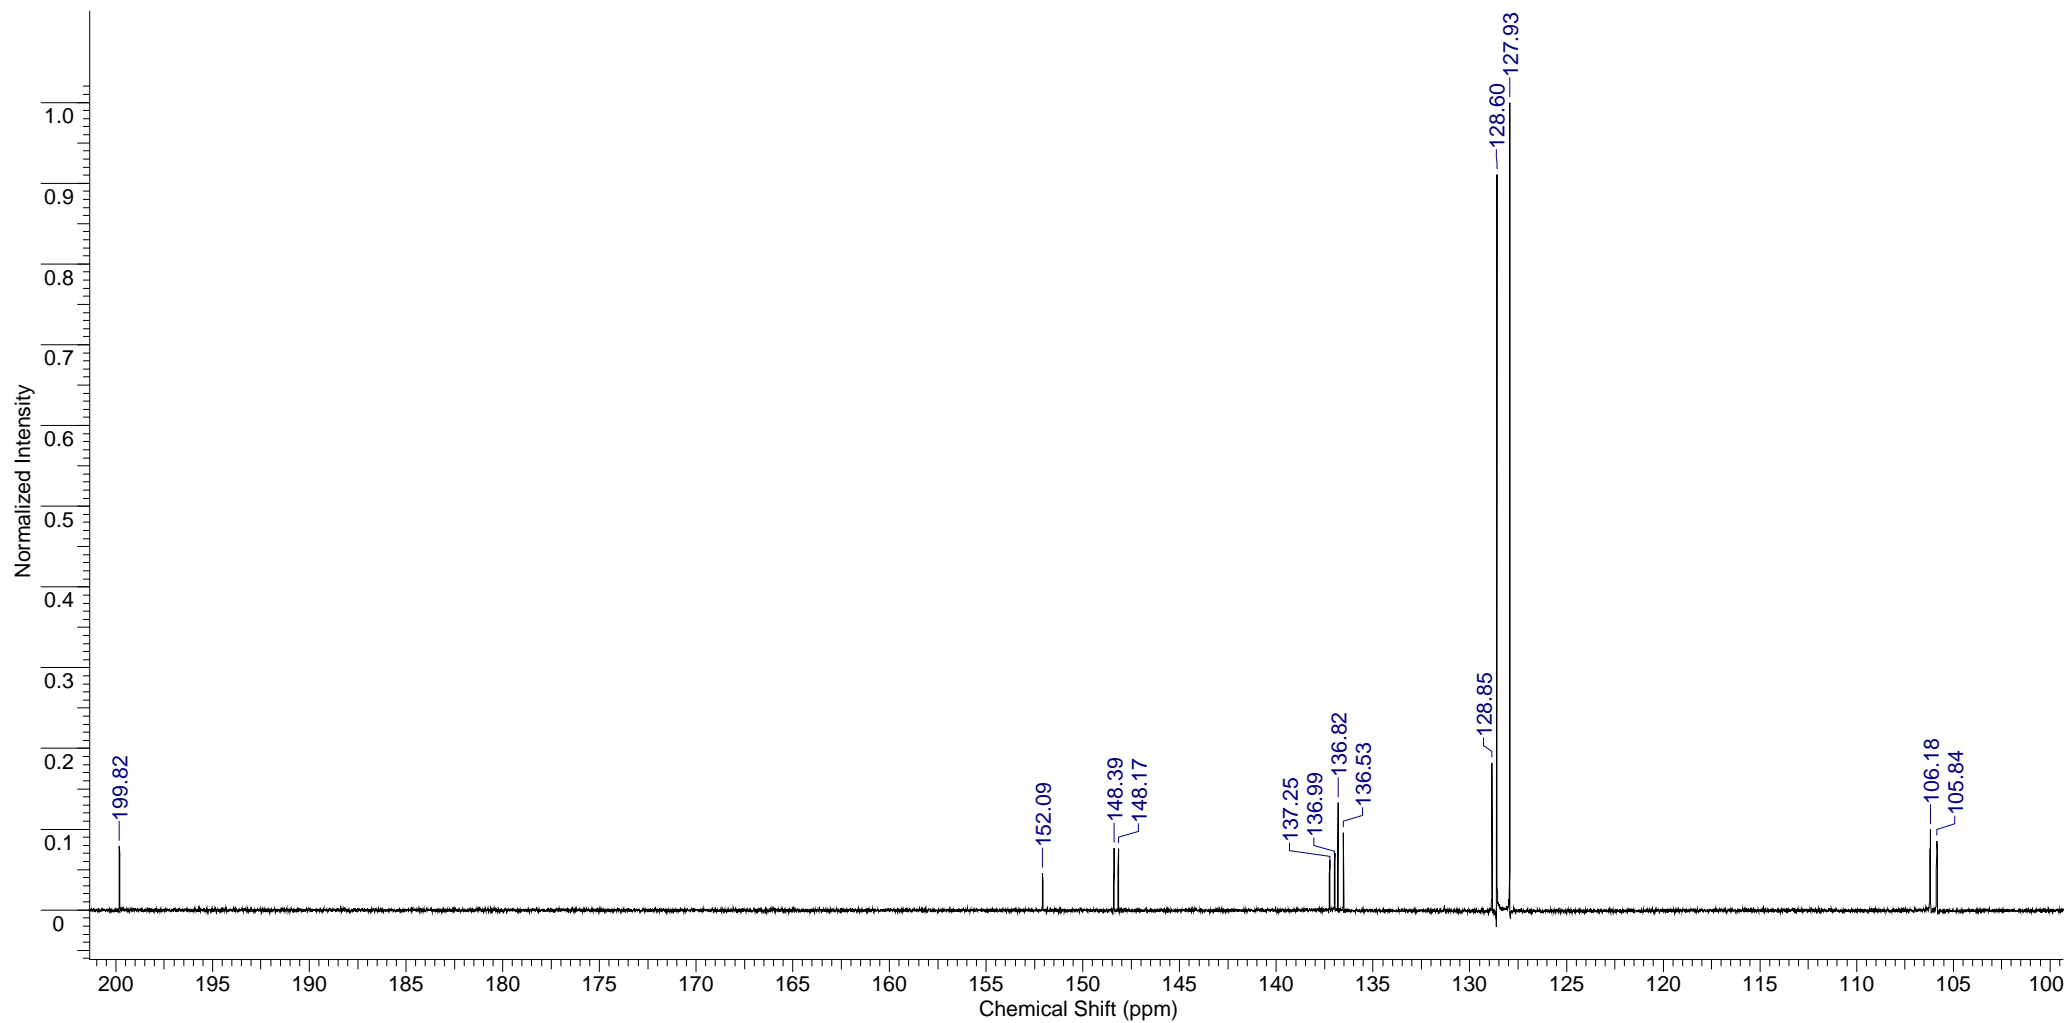

<sup>13</sup>C NMR spectra for 3b.

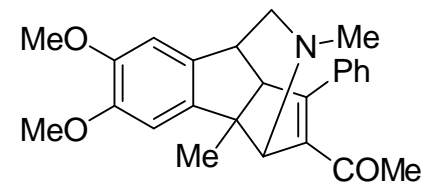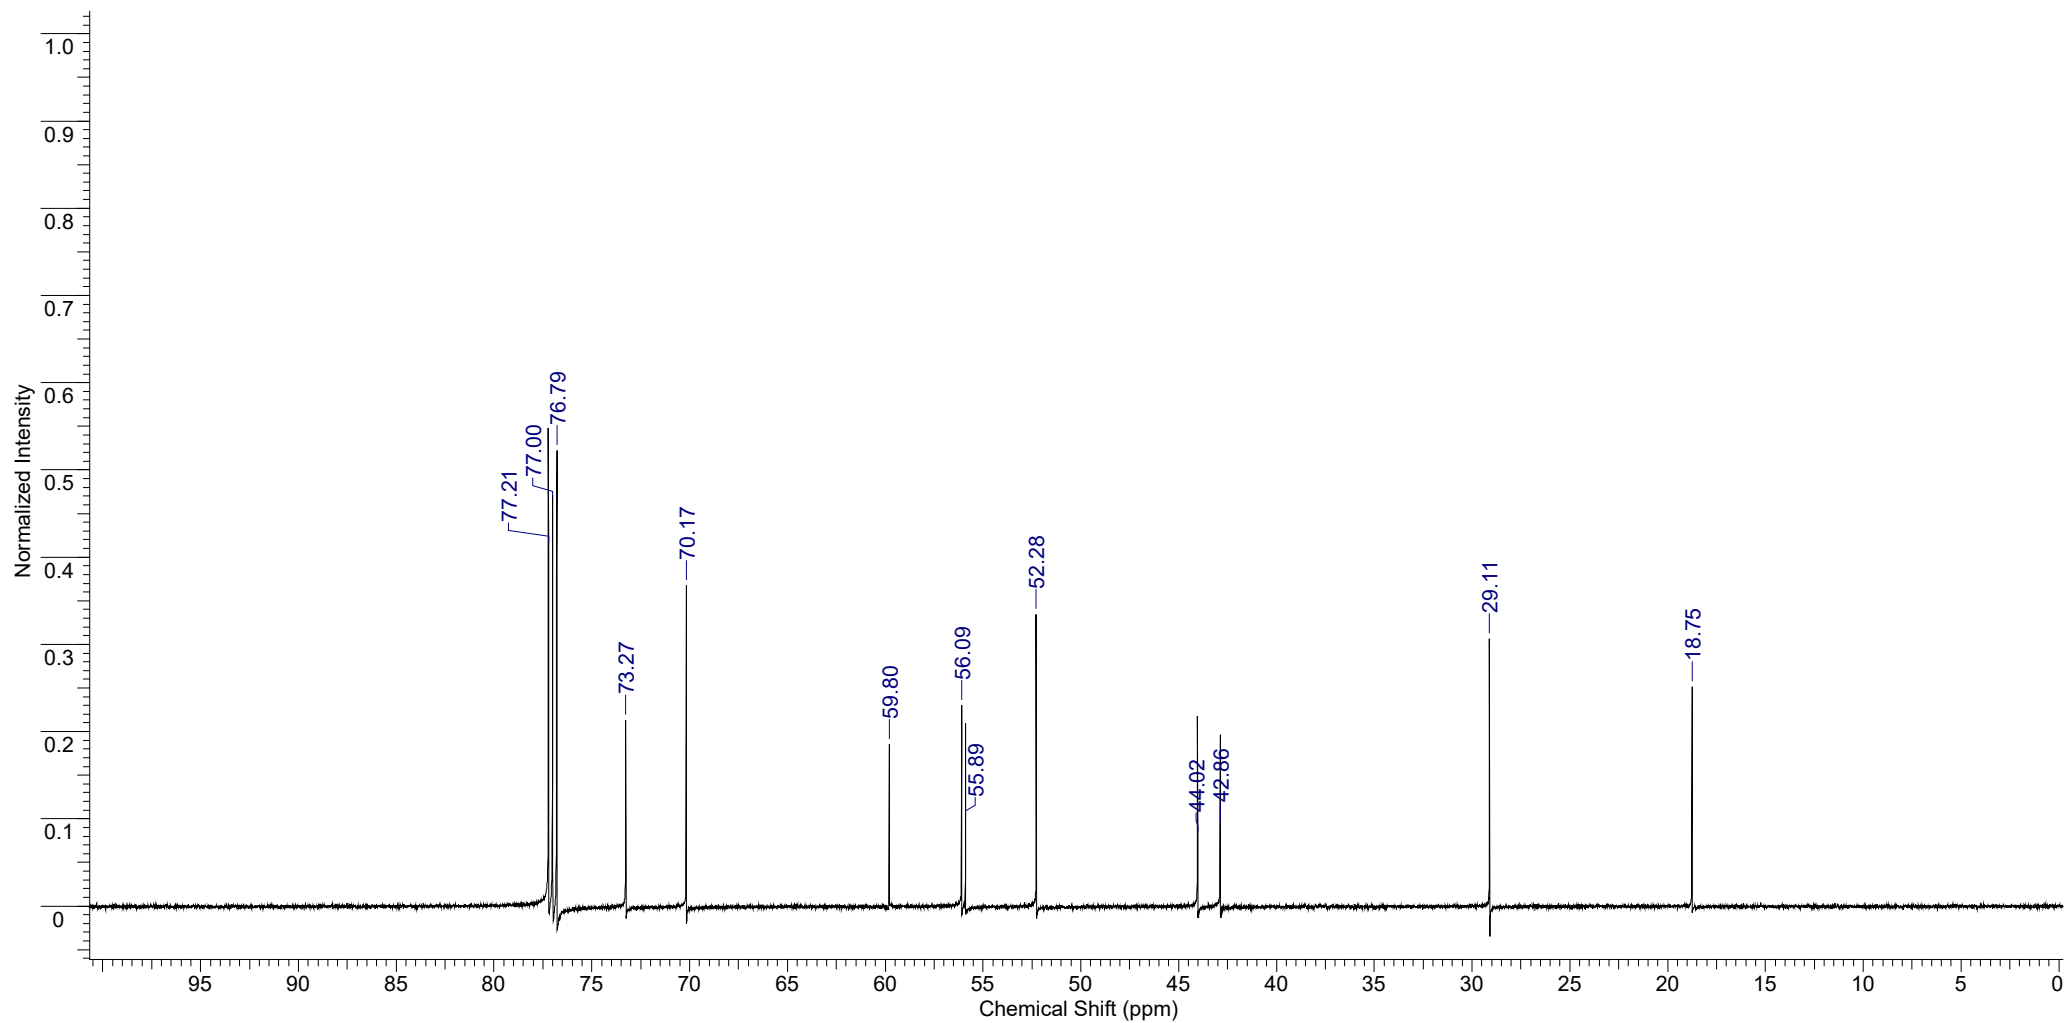

1-[3a-Benzyl-5,6-dimethoxy-10-methyl-1-phenyl-3,3a,8,8a-tetrahydro-3,8-(epiminomethano)cyclopenta[a]inden-2-yl]ethanone (3h)

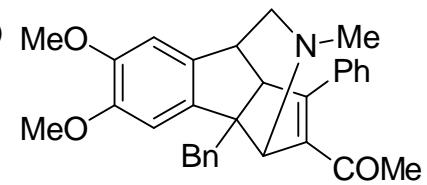

<sup>1</sup>H NMR spectra for 3h.

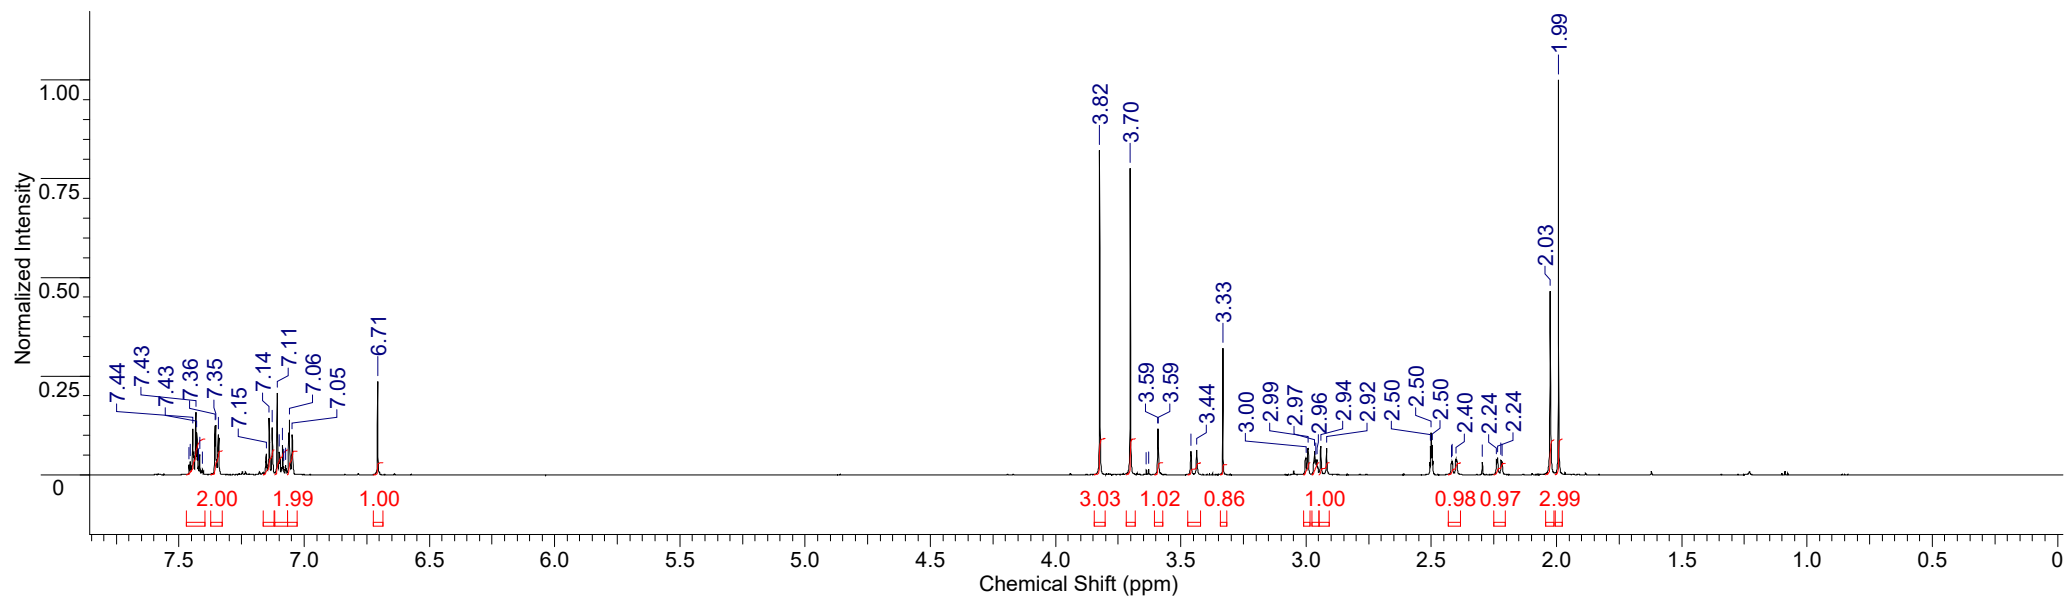



<sup>1</sup>H NMR spectra for 3h.

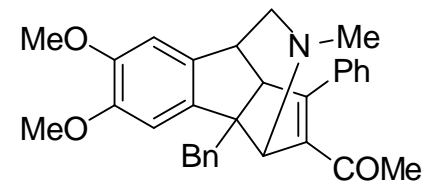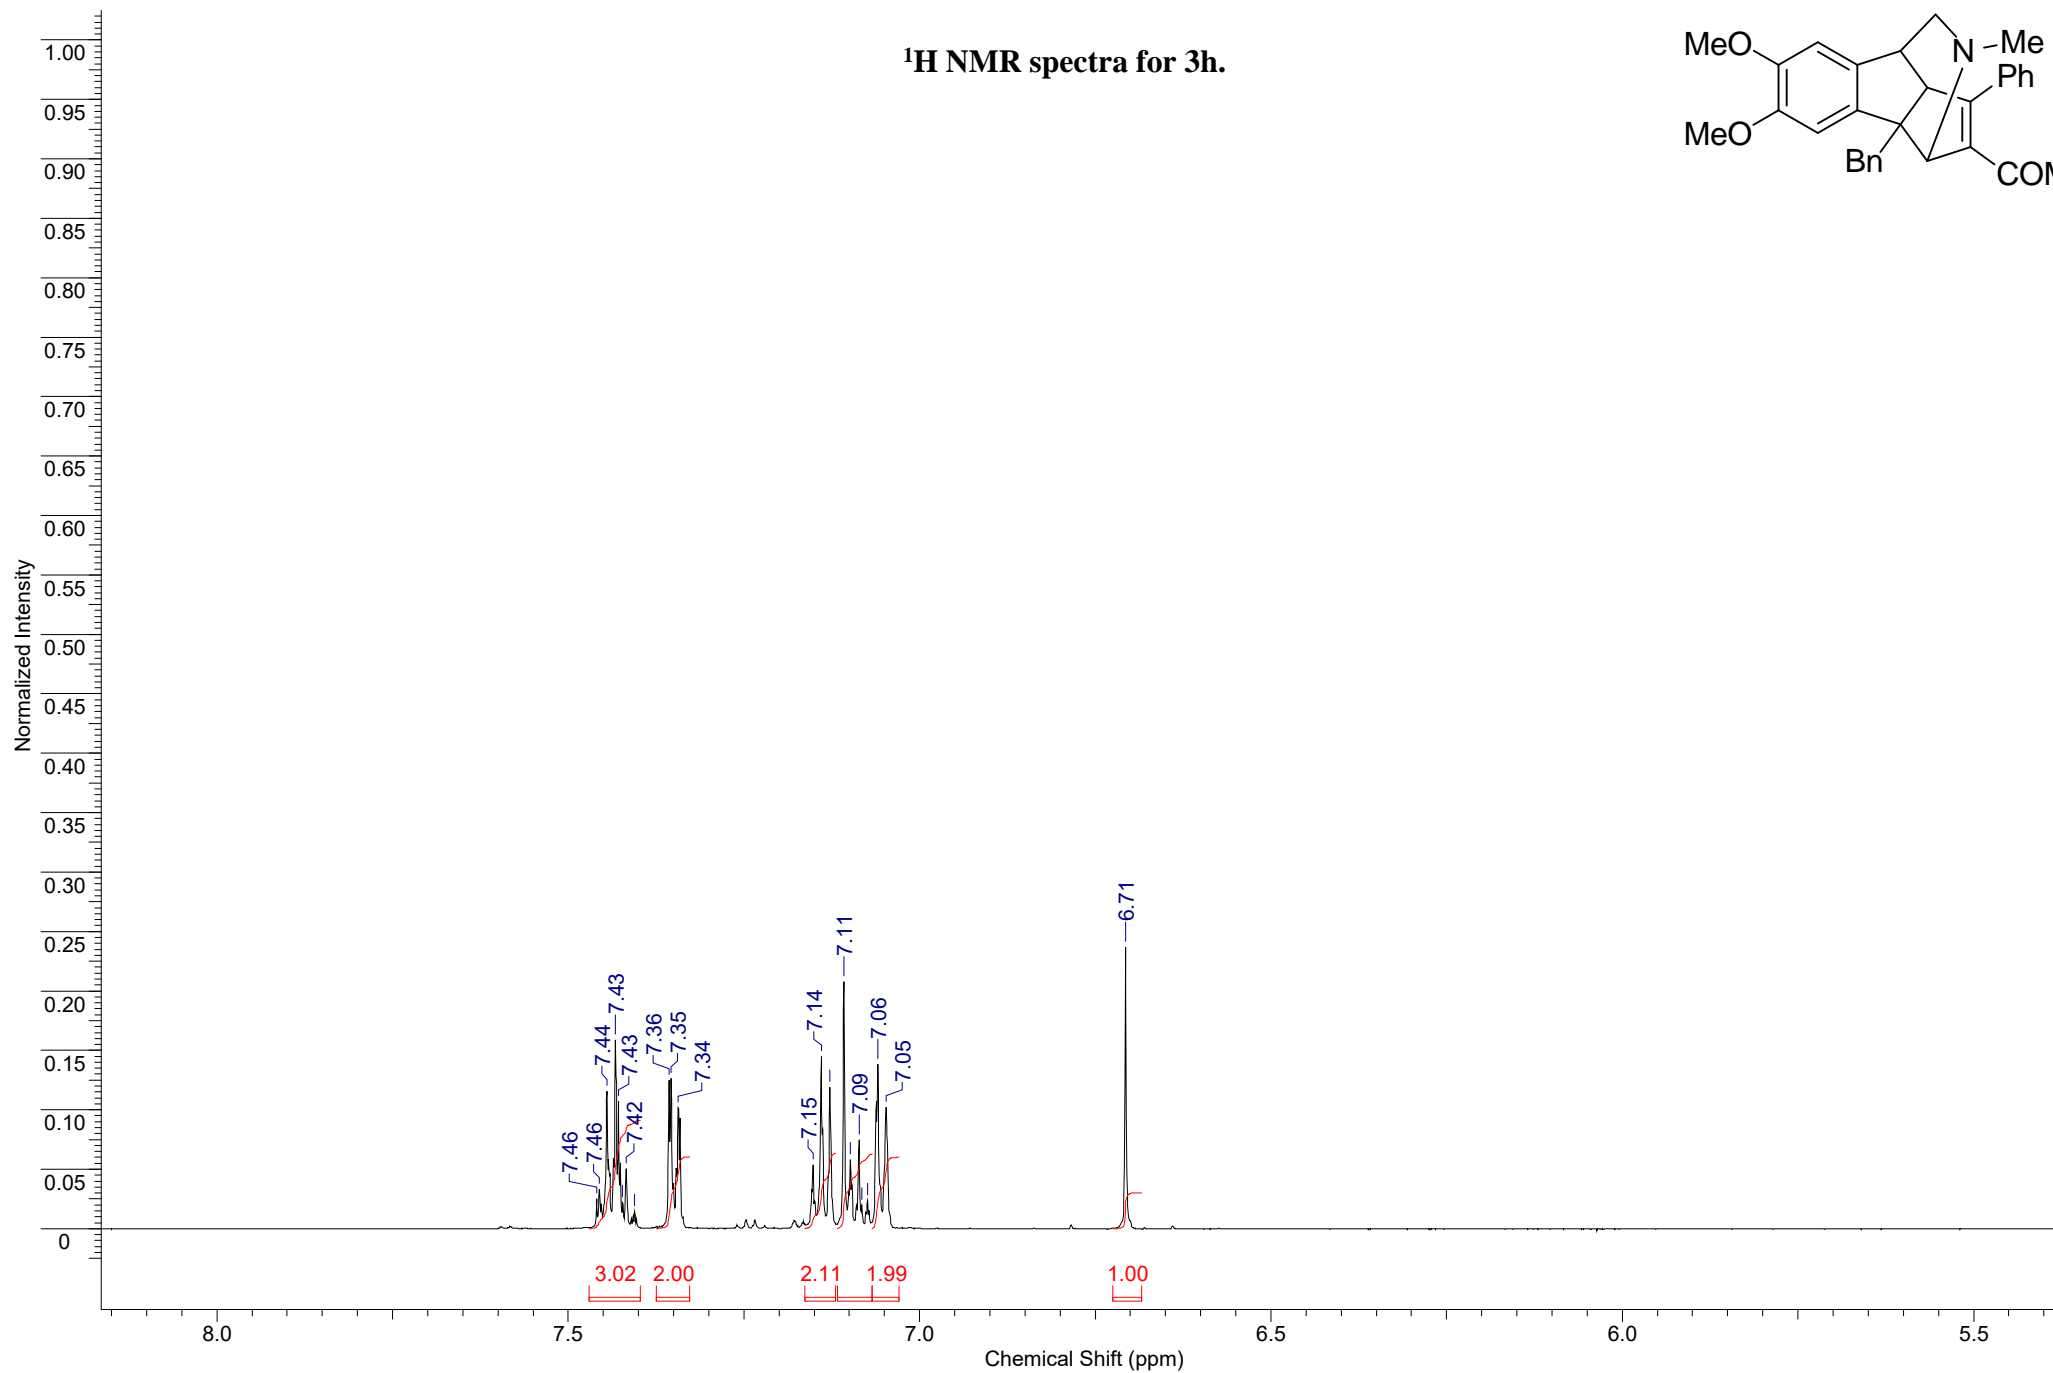

<sup>1</sup>H NMR spectra for 3h.

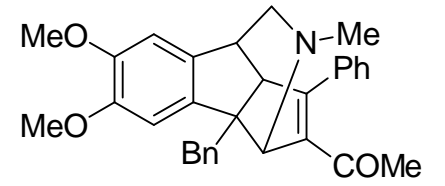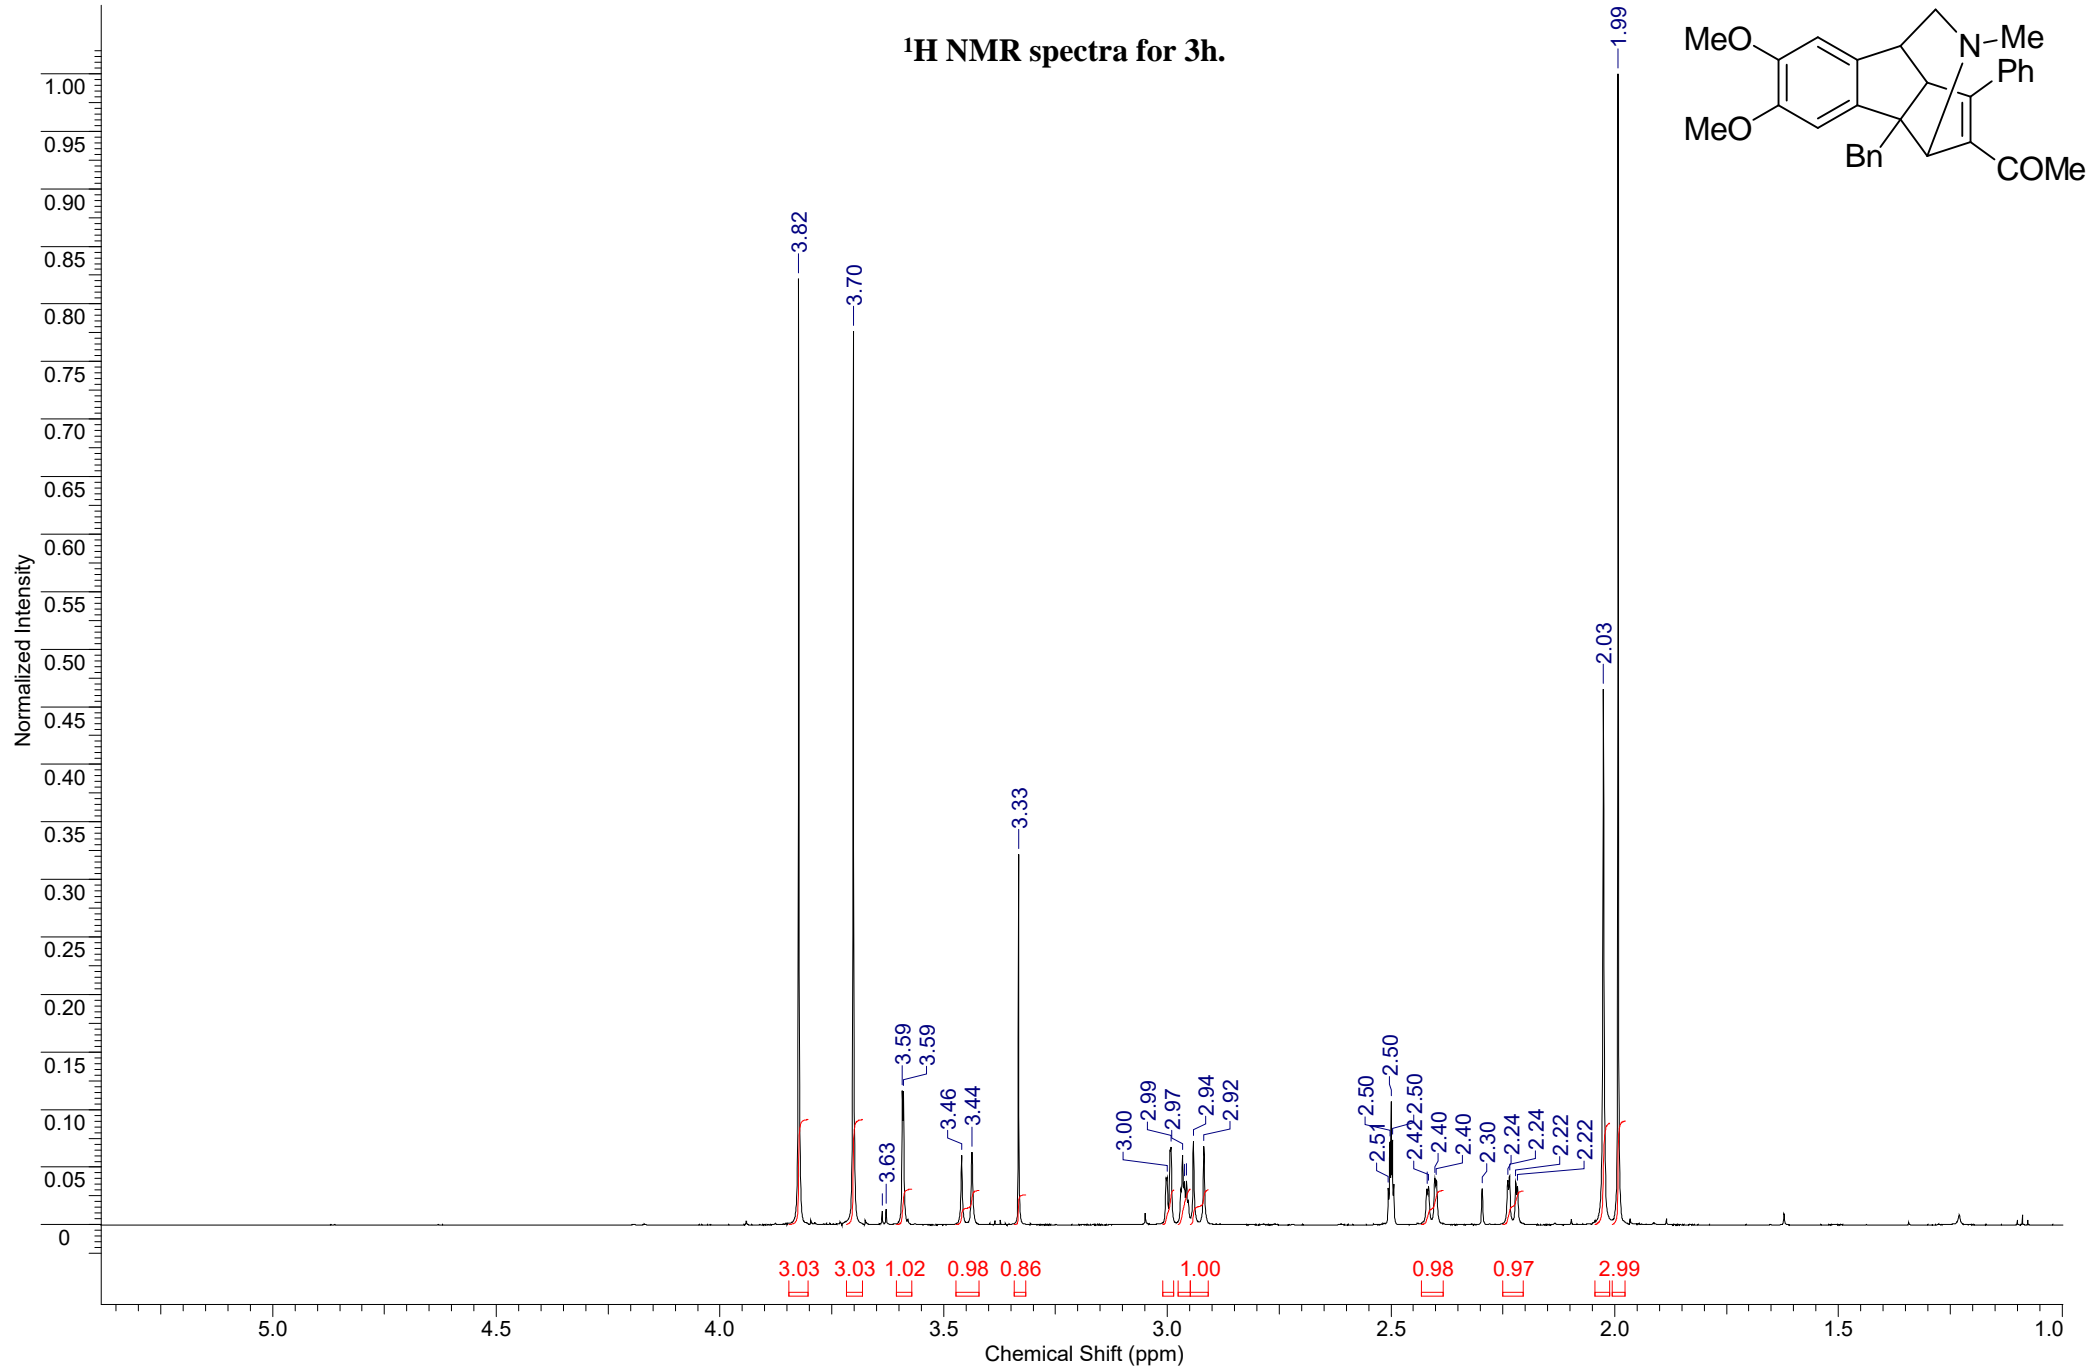

<sup>13</sup>C NMR spectra for 3h.

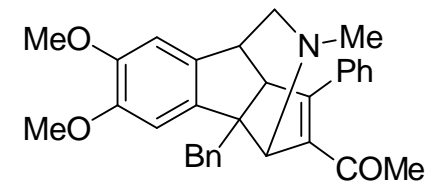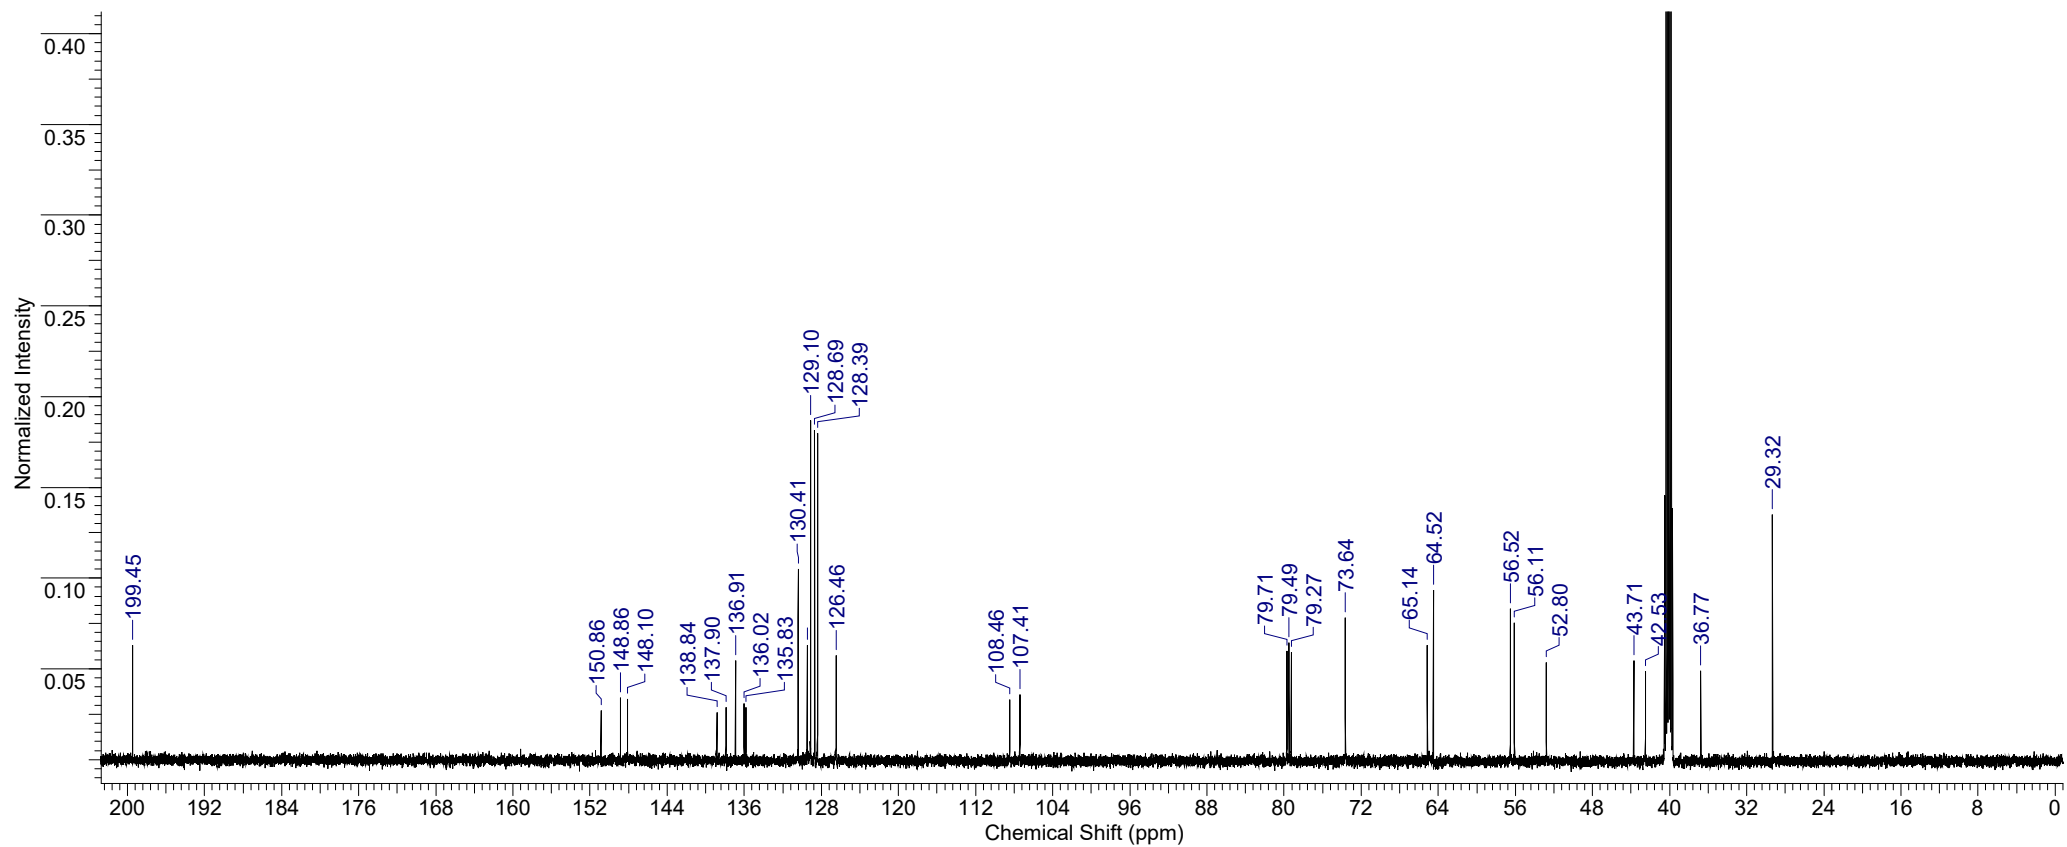

<sup>13</sup>C NMR spectra for 3h.

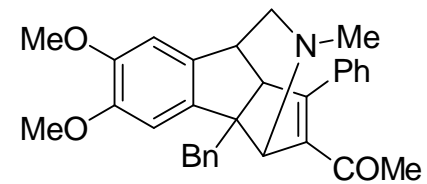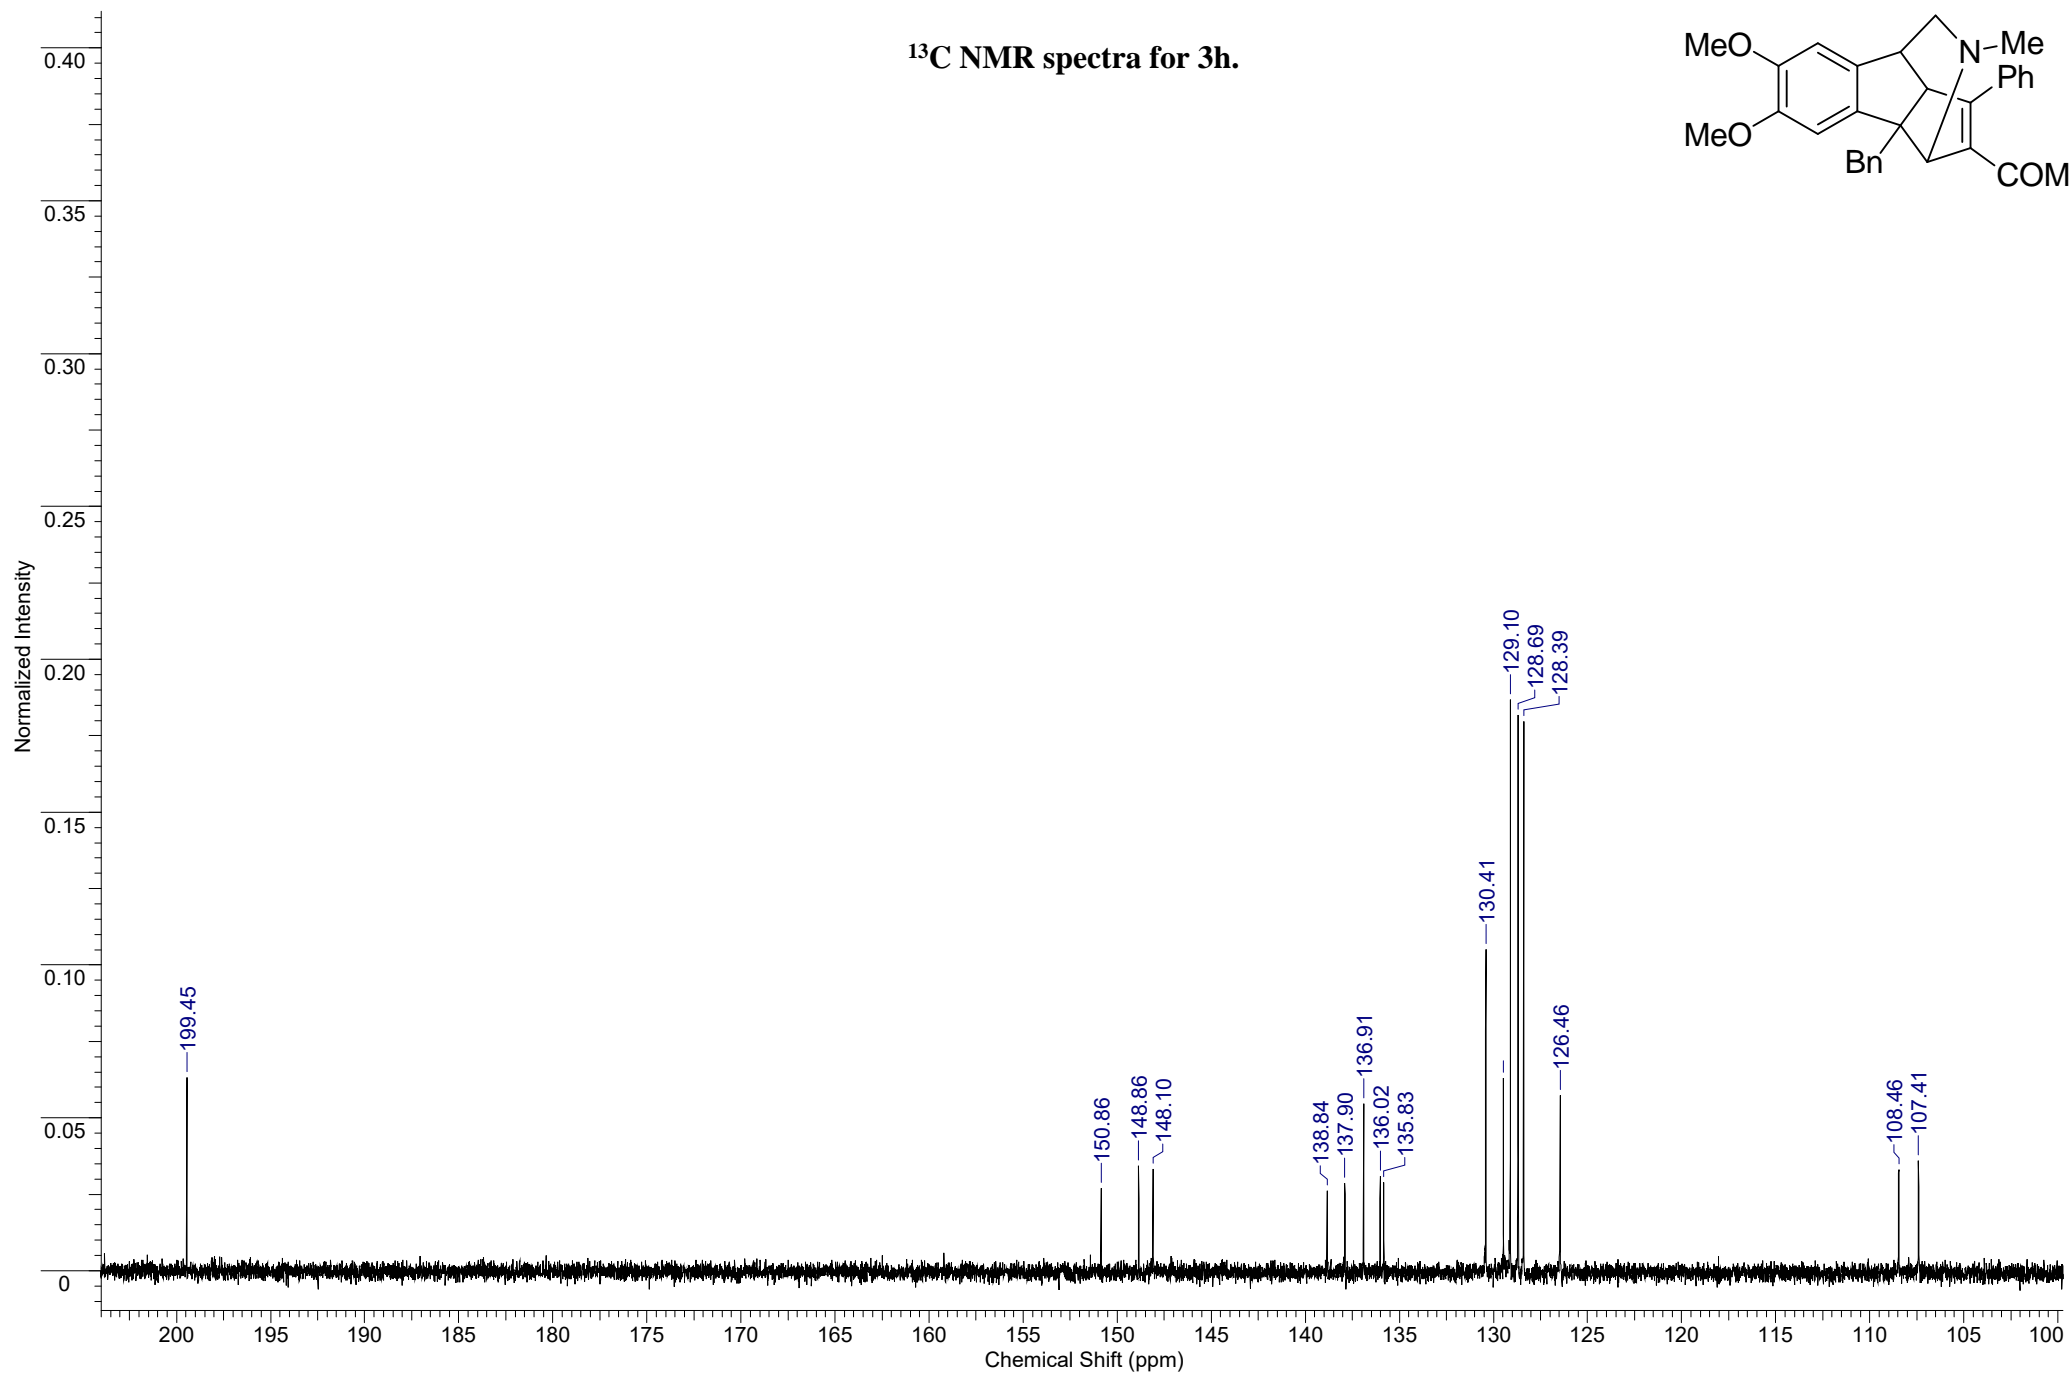

<sup>13</sup>C NMR spectra for 3h.

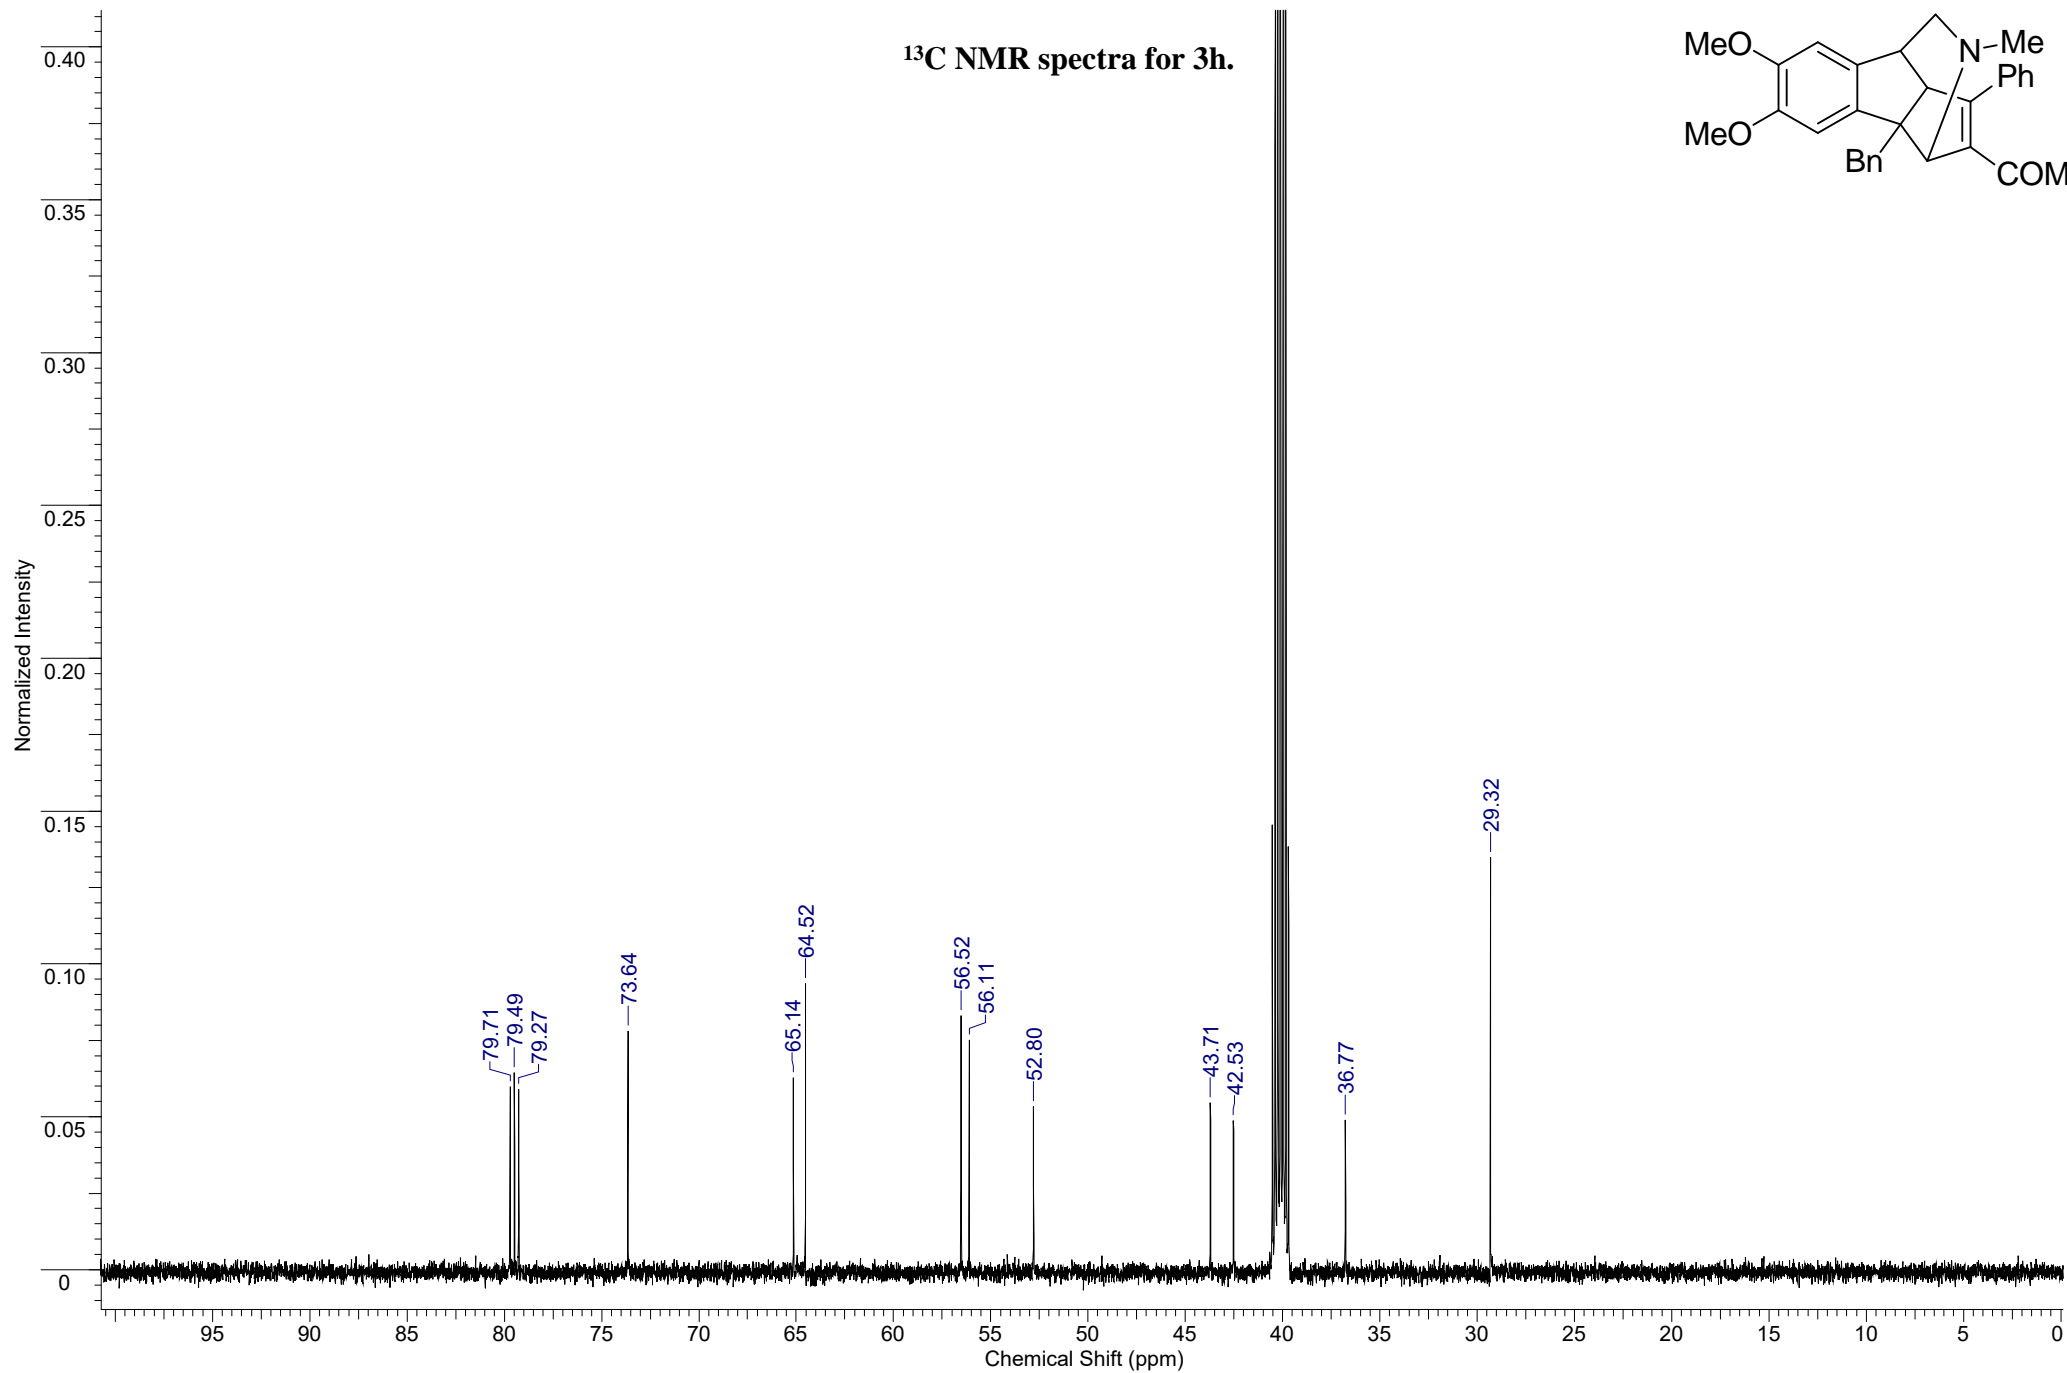

1-[5,6-Dimethoxy-10-methyl-1,3a-diphenyl-3,3a,8,8a-tetrahydro-3,8-(epiminomethano)cyclopenta[a]inden-2-yl]ethanone (3k)

<sup>1</sup>H NMR spectra for 3k.

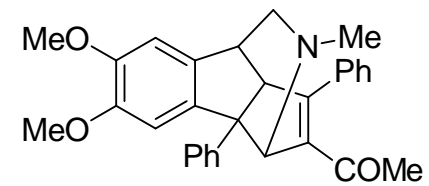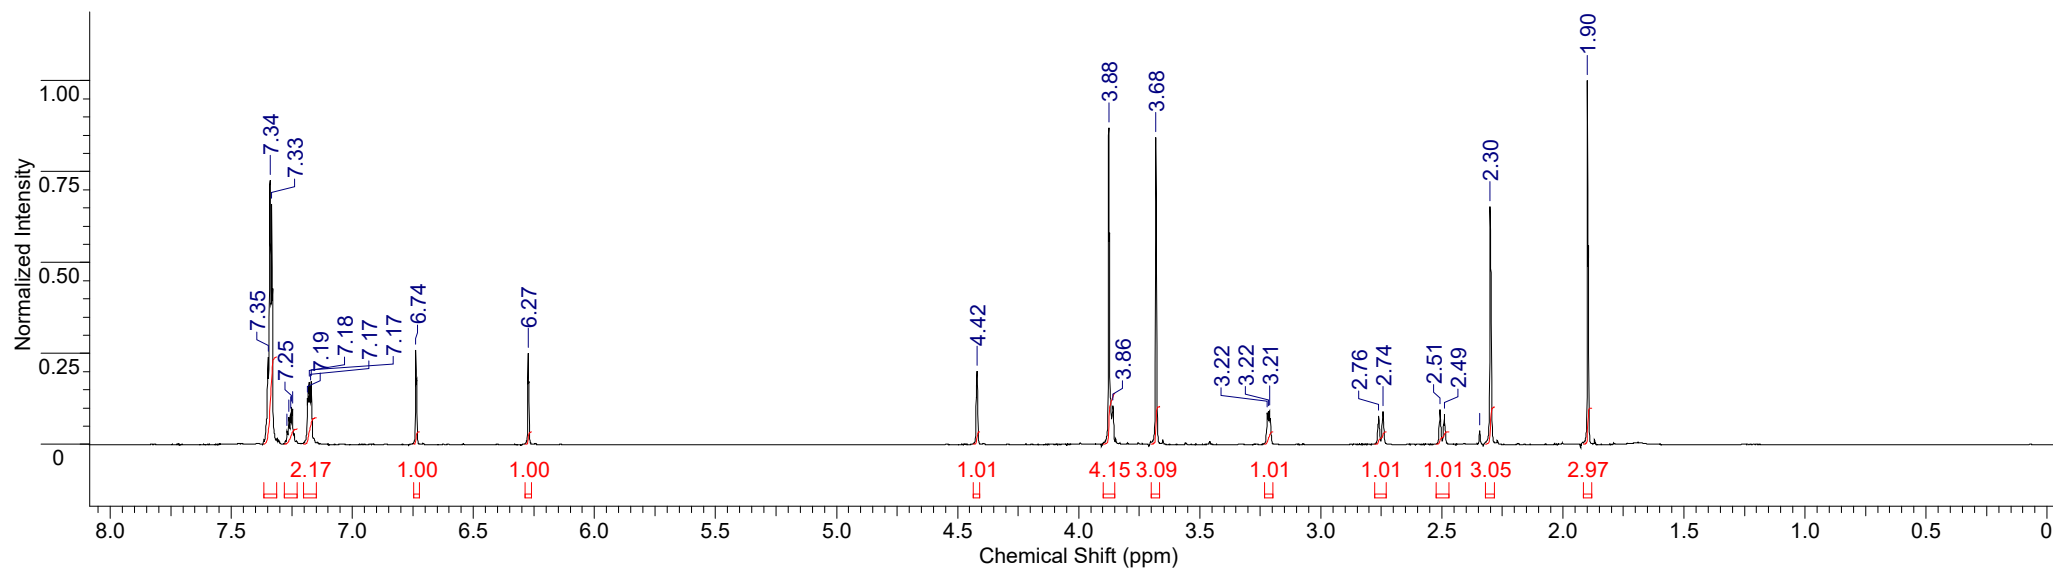

<sup>1</sup>H NMR spectra for 3k.

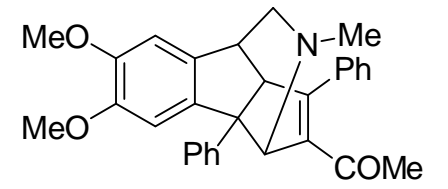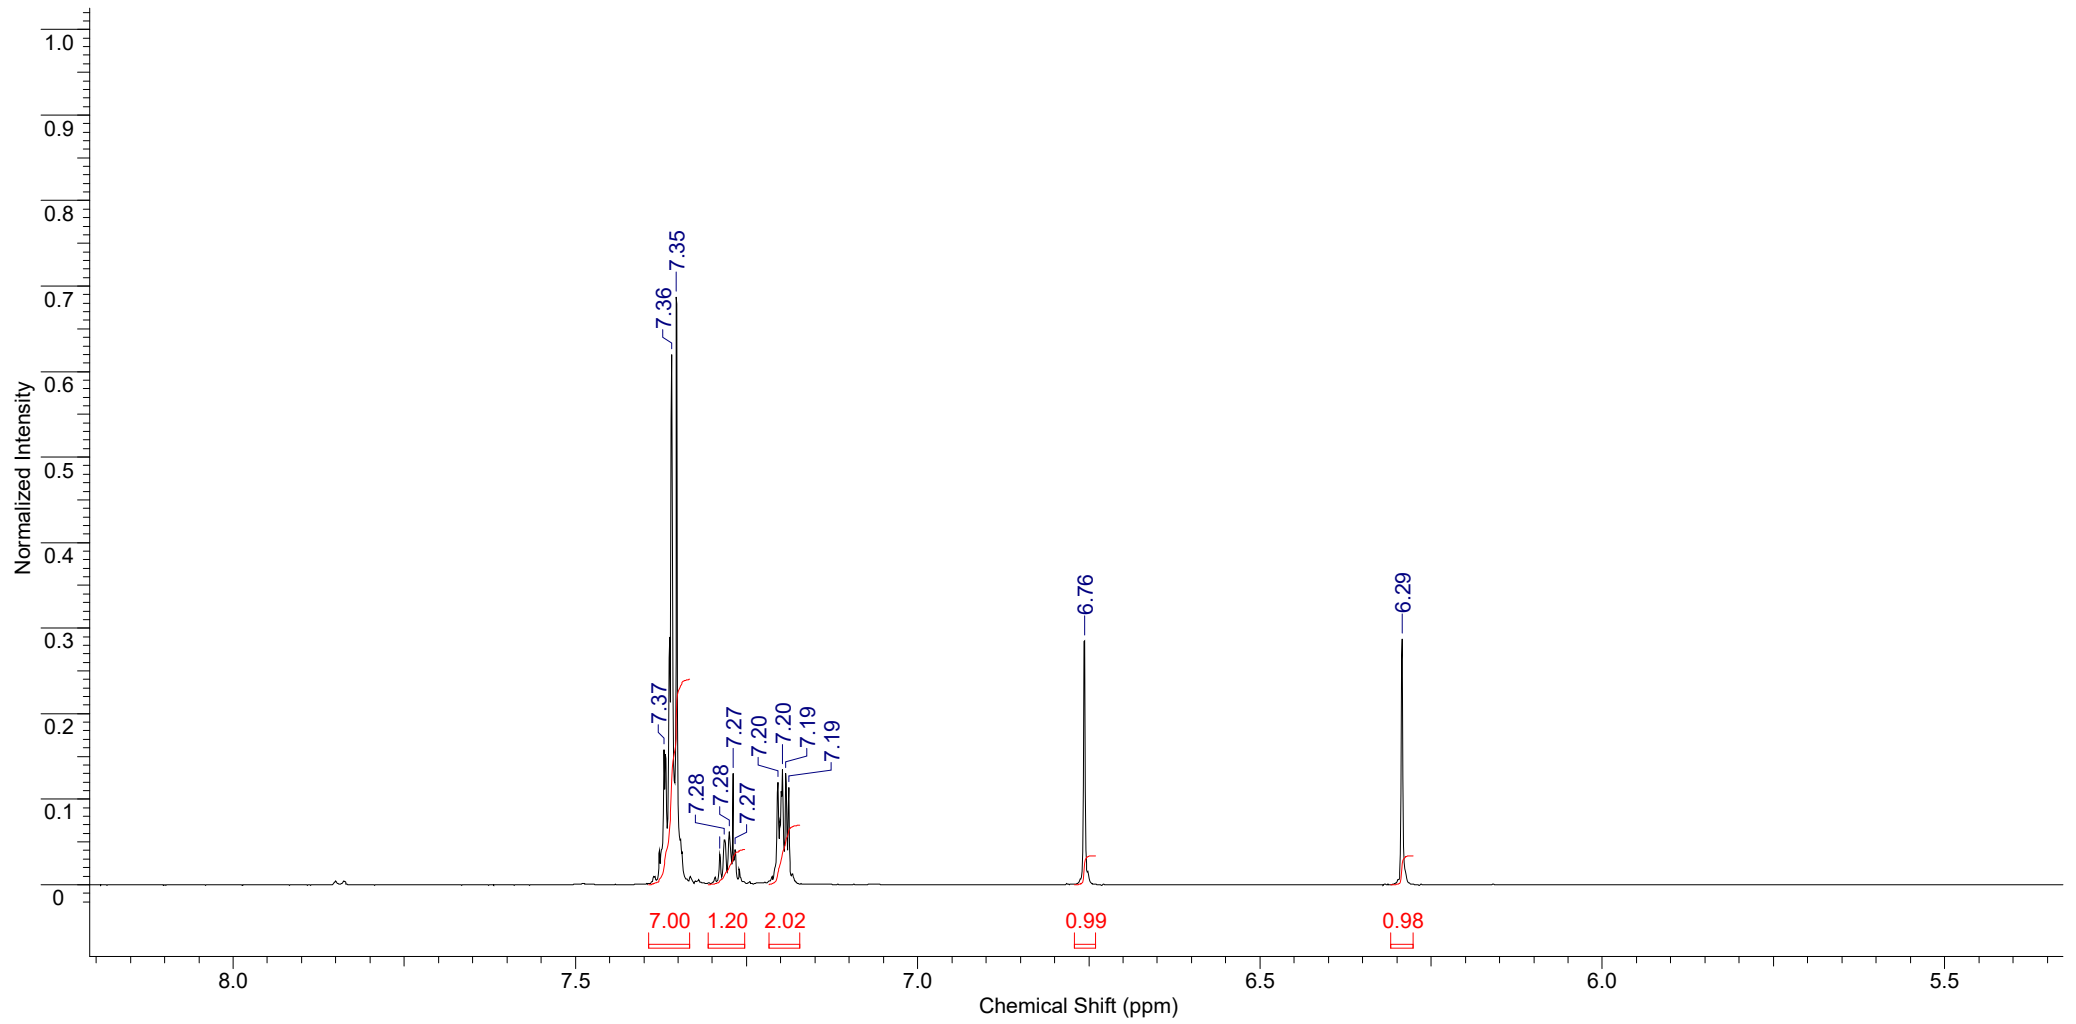

<sup>1</sup>H NMR spectra for 3k.

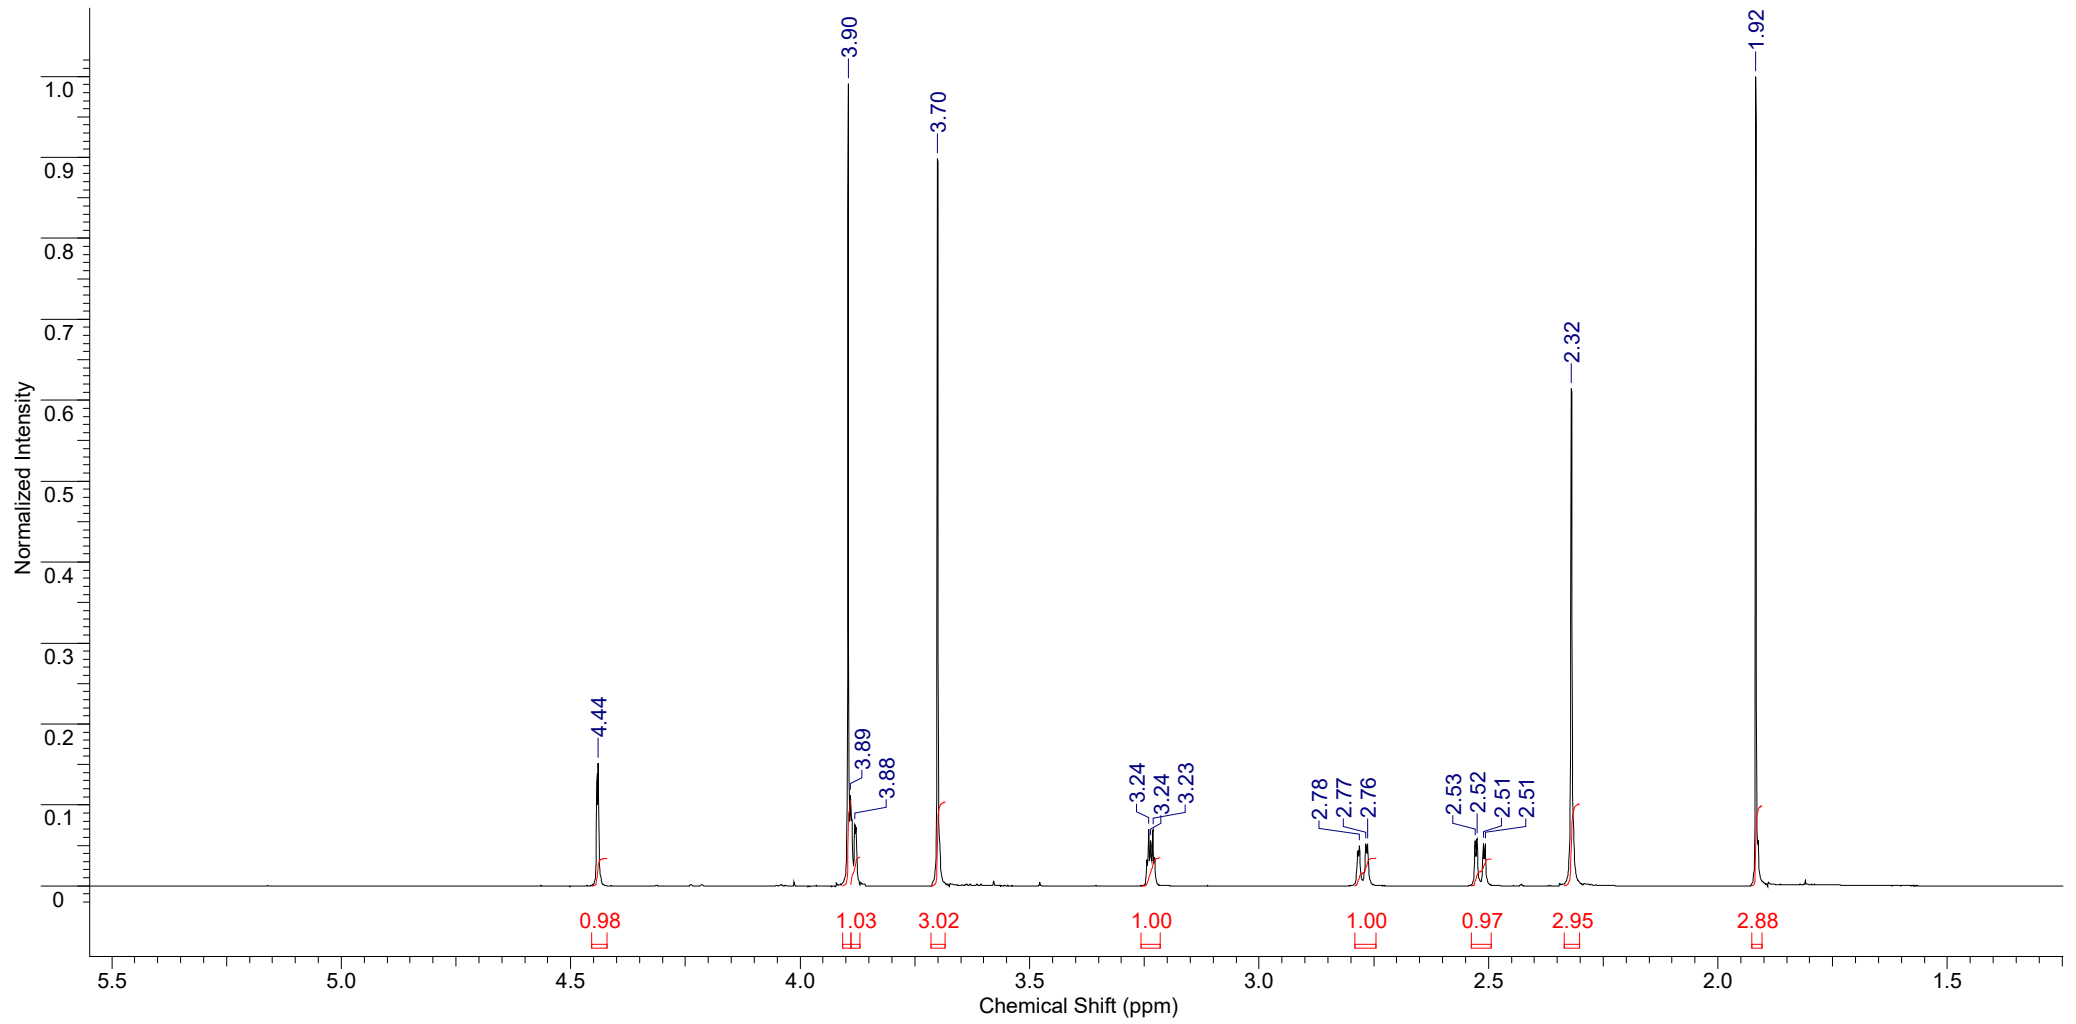



<sup>13</sup>C NMR spectra for 3k.

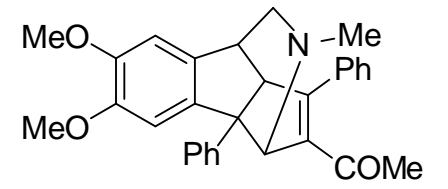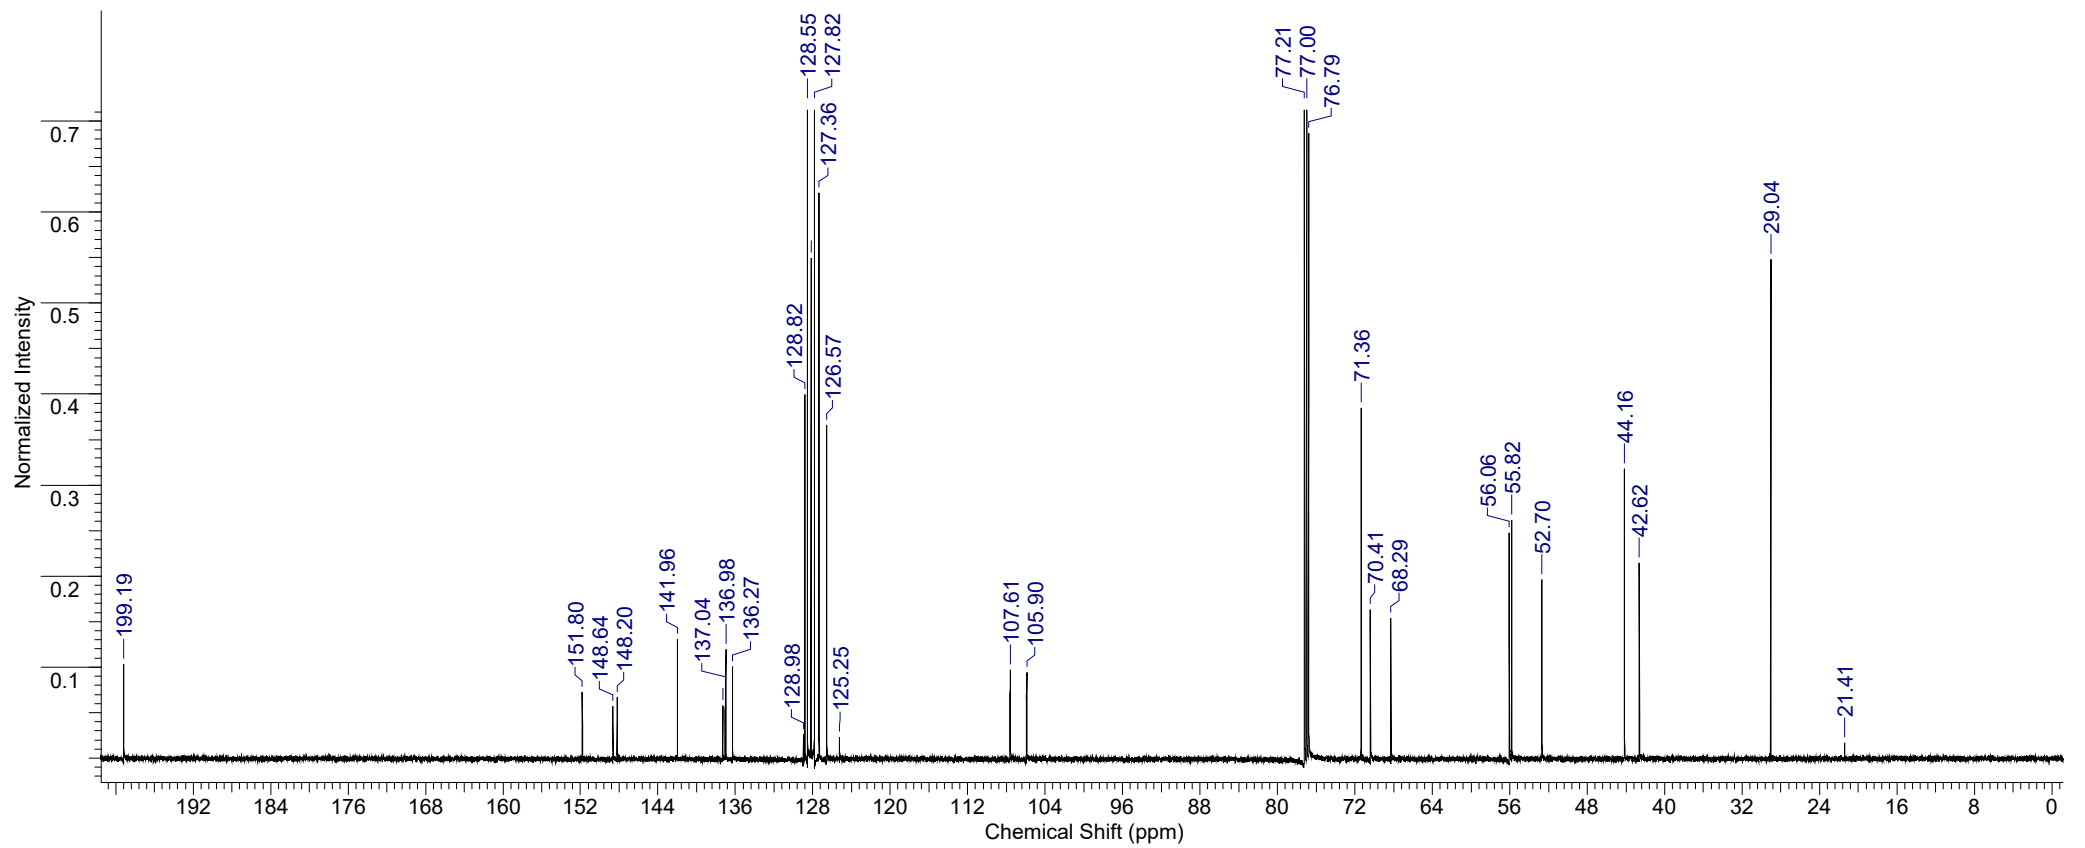

<sup>13</sup>C NMR spectra for 3k.

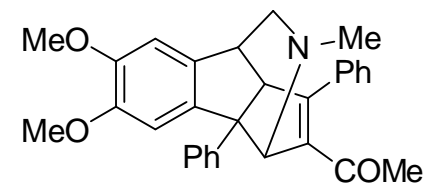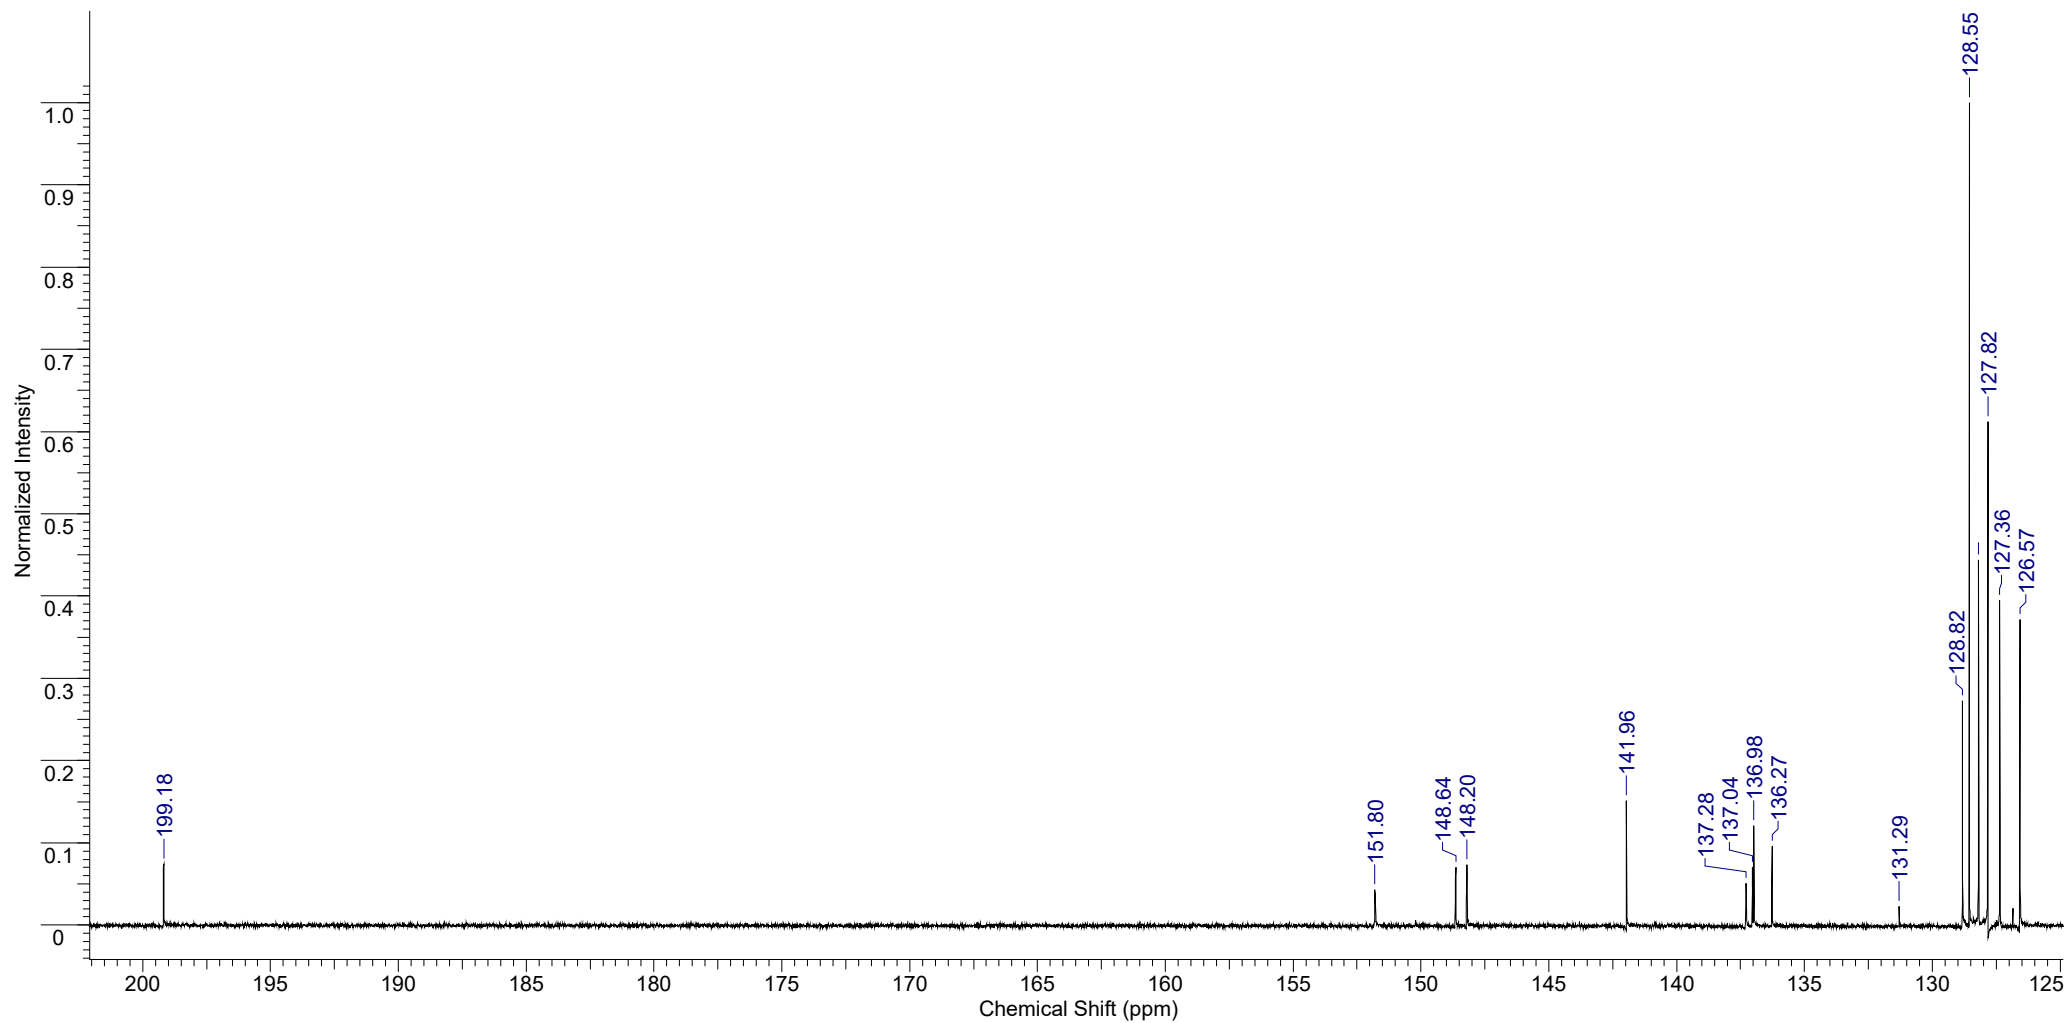

**<sup>13</sup>C NMR spectra for 3k.**

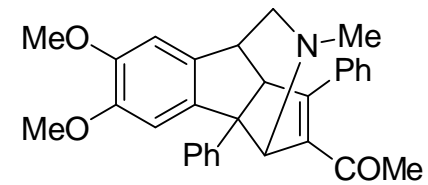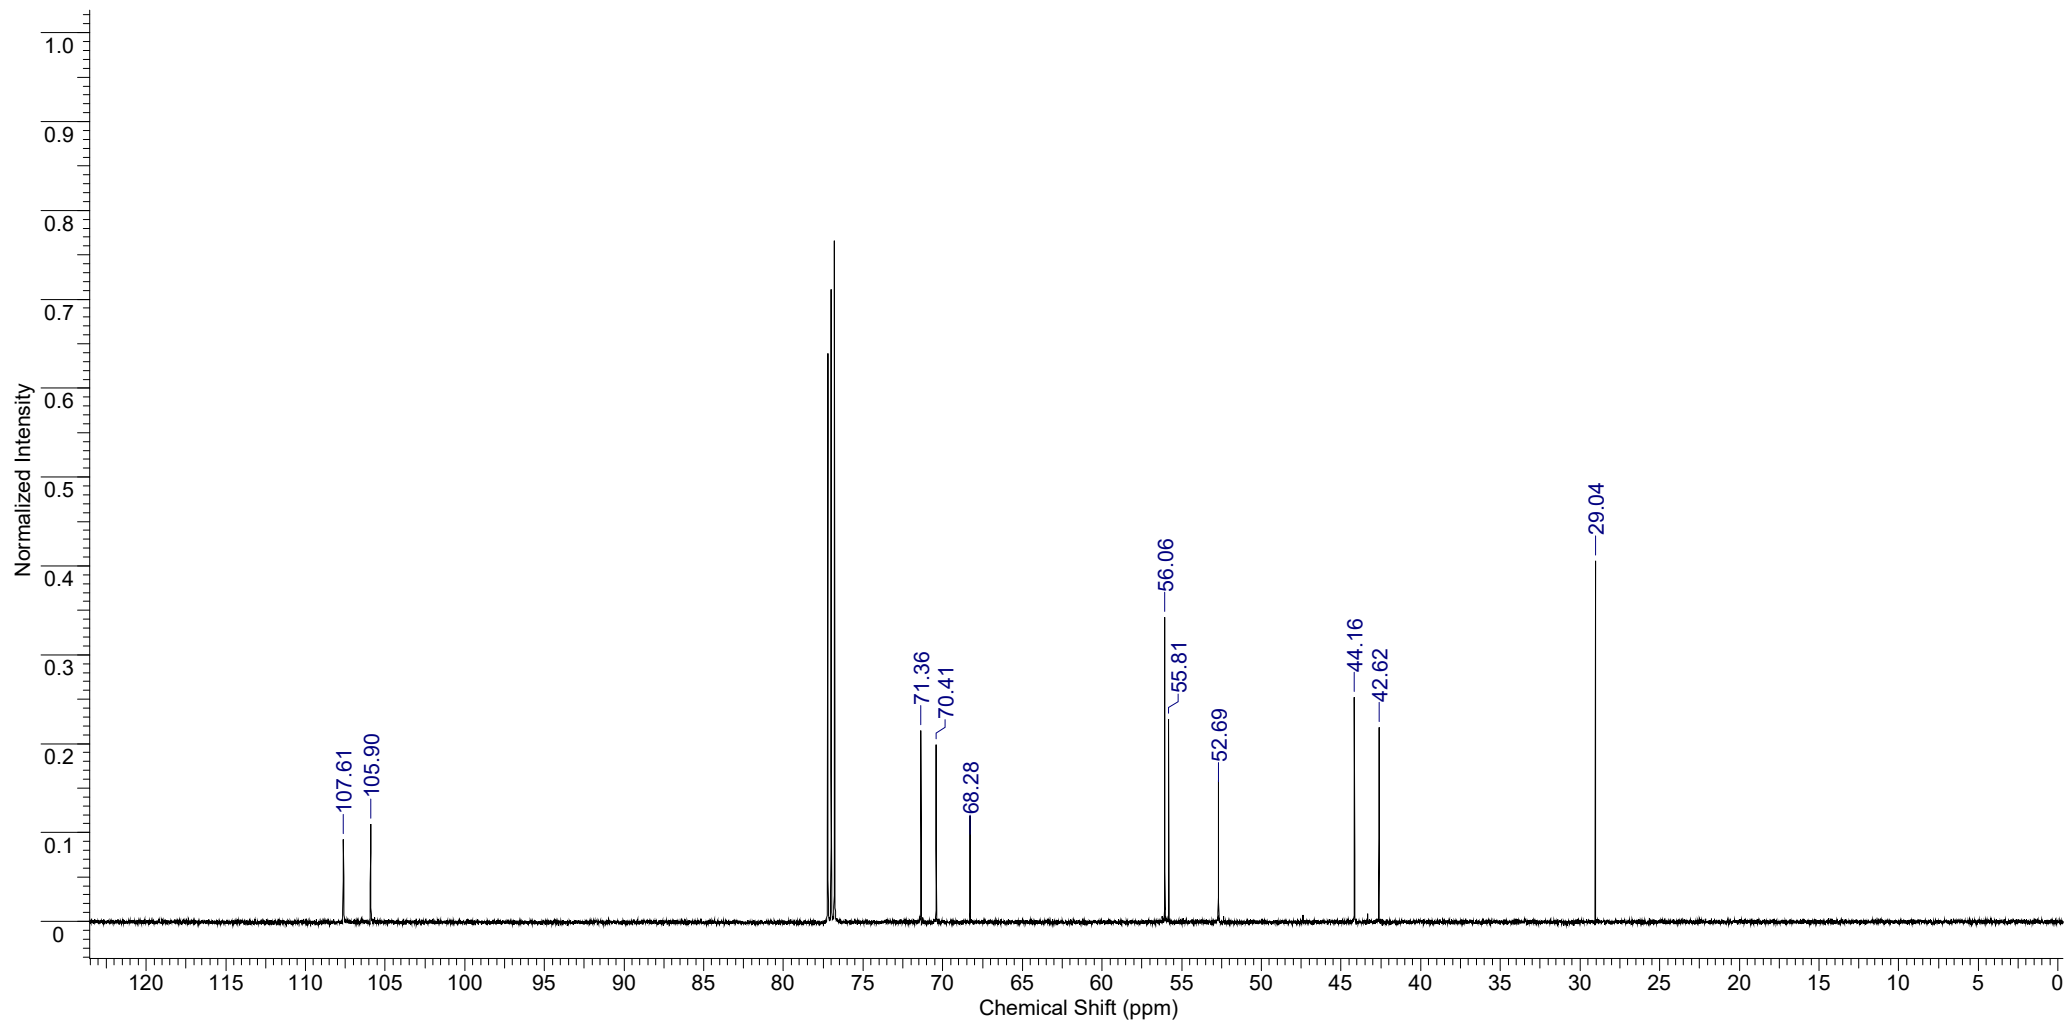

1-(6,7-Dimethoxy-2,4b-dimethyl-4a-phenyl-1,2,4a,4b,8b,8c-hexahydro-2-azabenz[*a*]cyclopropa[*cd*]azulen-4-yl)ethanone (2b)

<sup>1</sup>H NMR spectra for 2b.

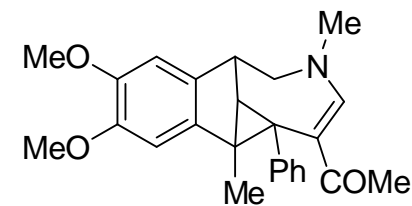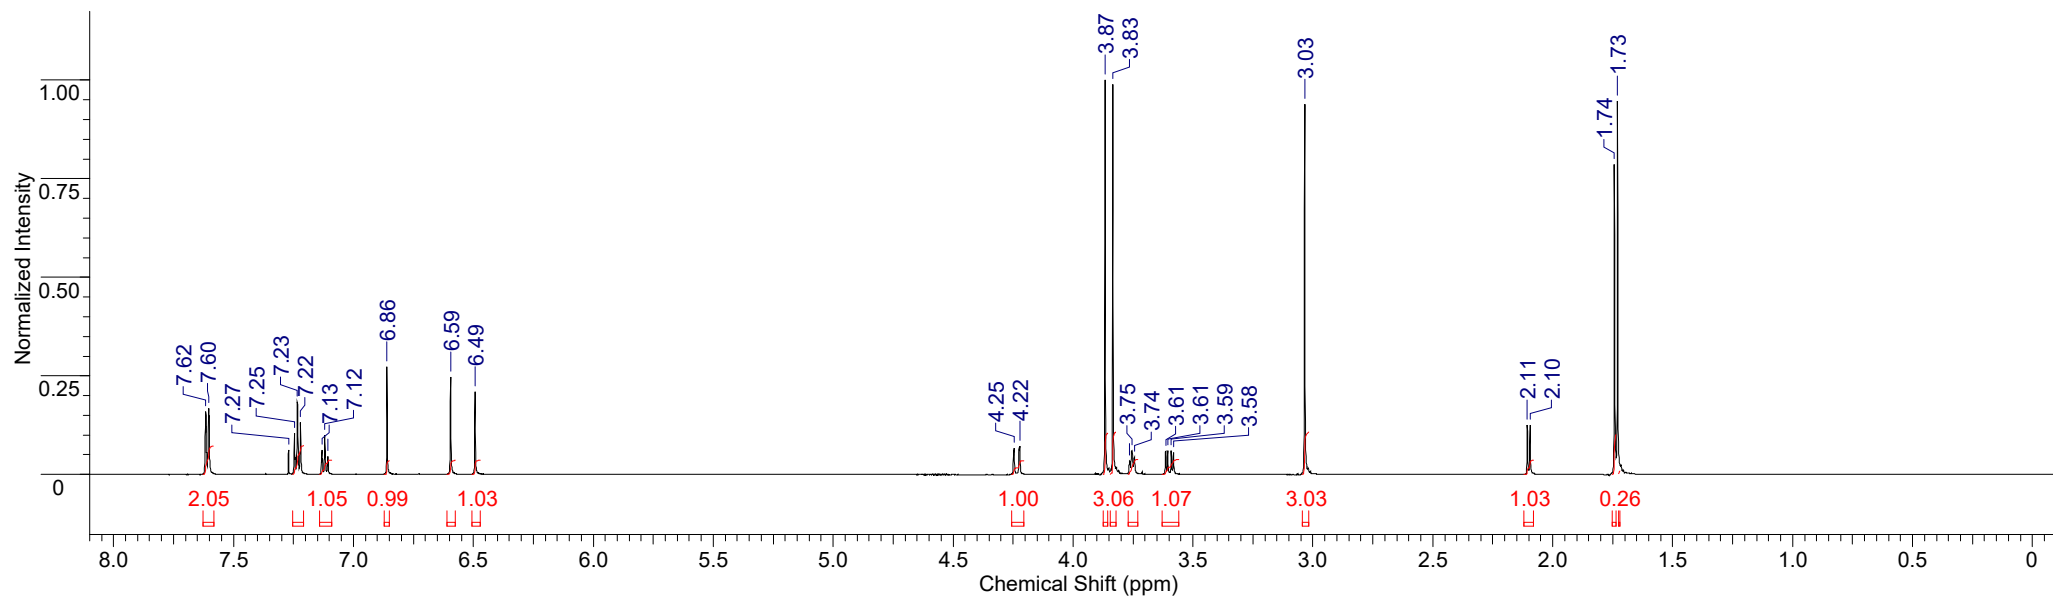

<sup>1</sup>H NMR spectra for 2b.

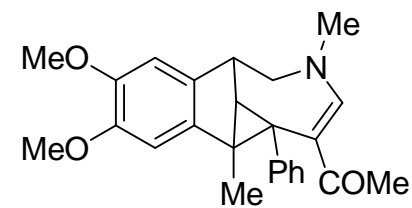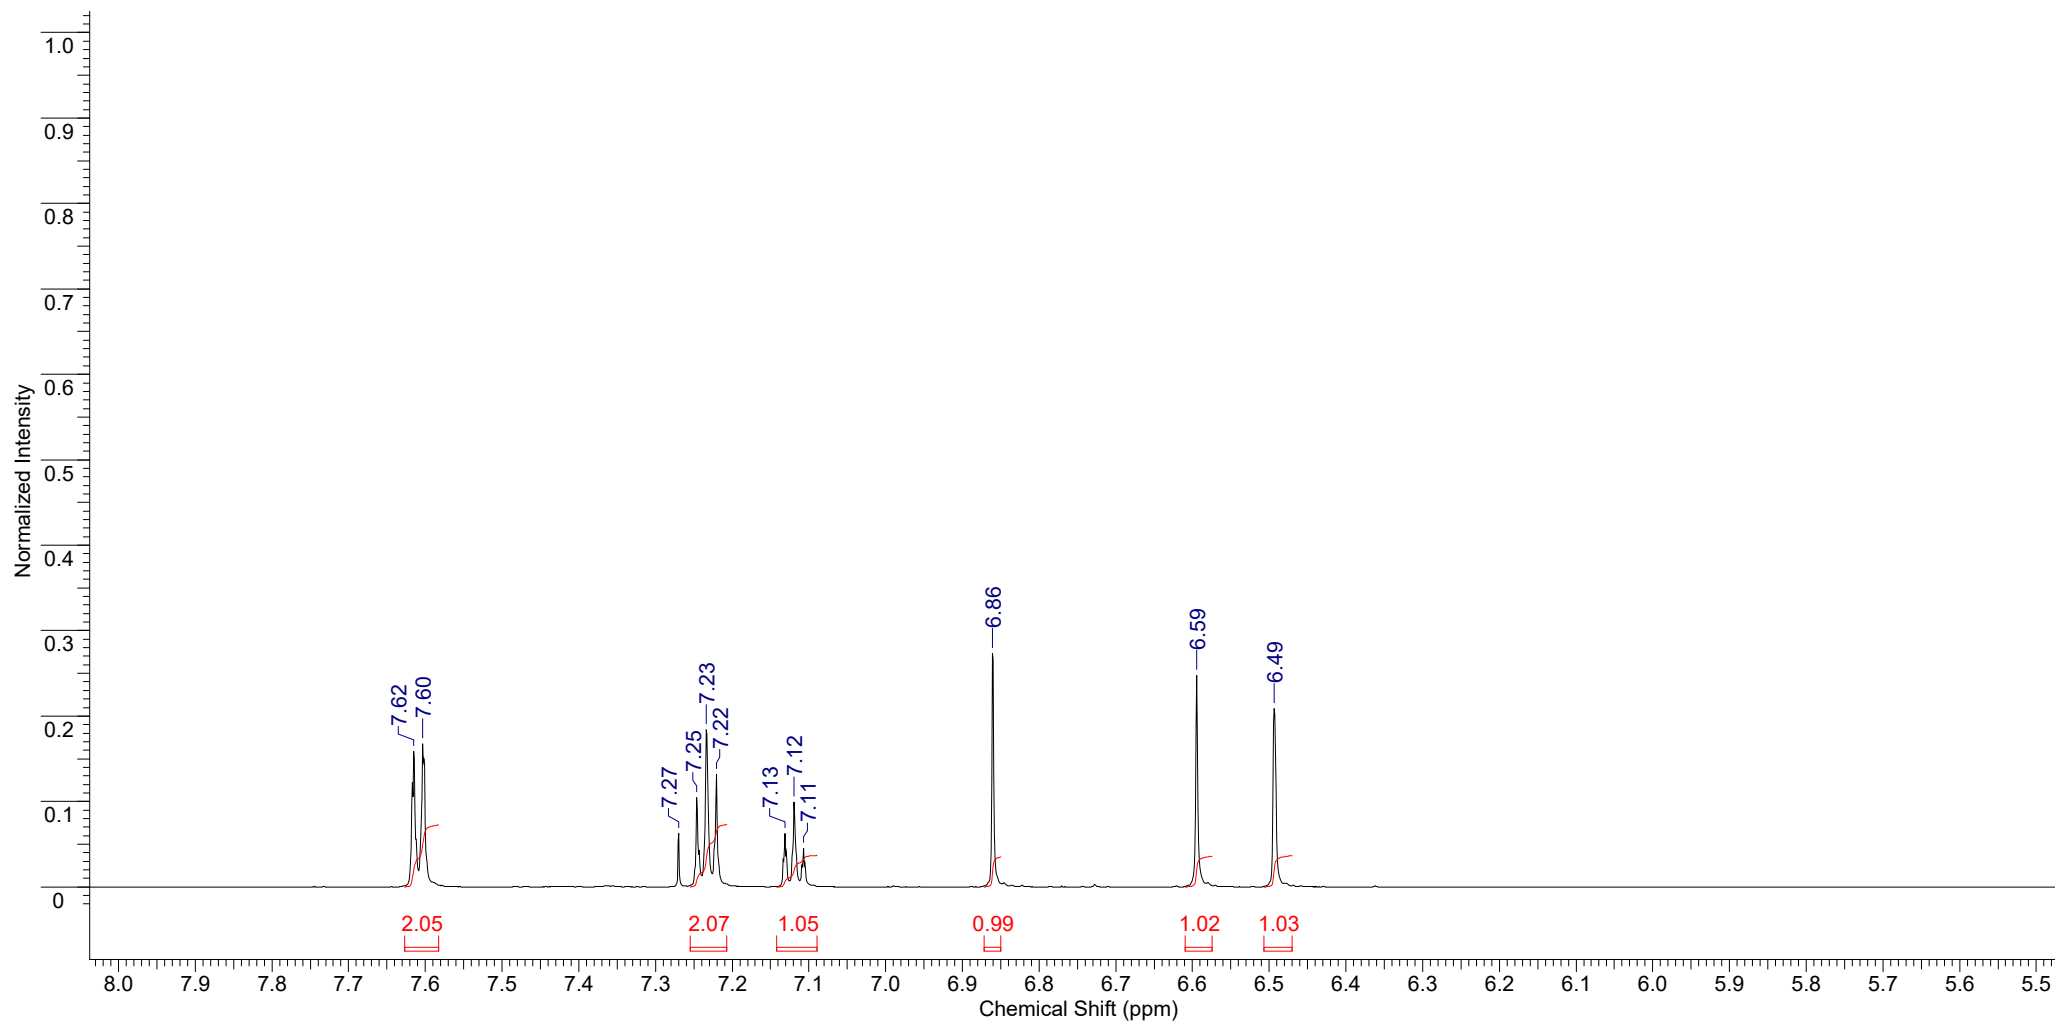

<sup>1</sup>H NMR spectra for 2b.

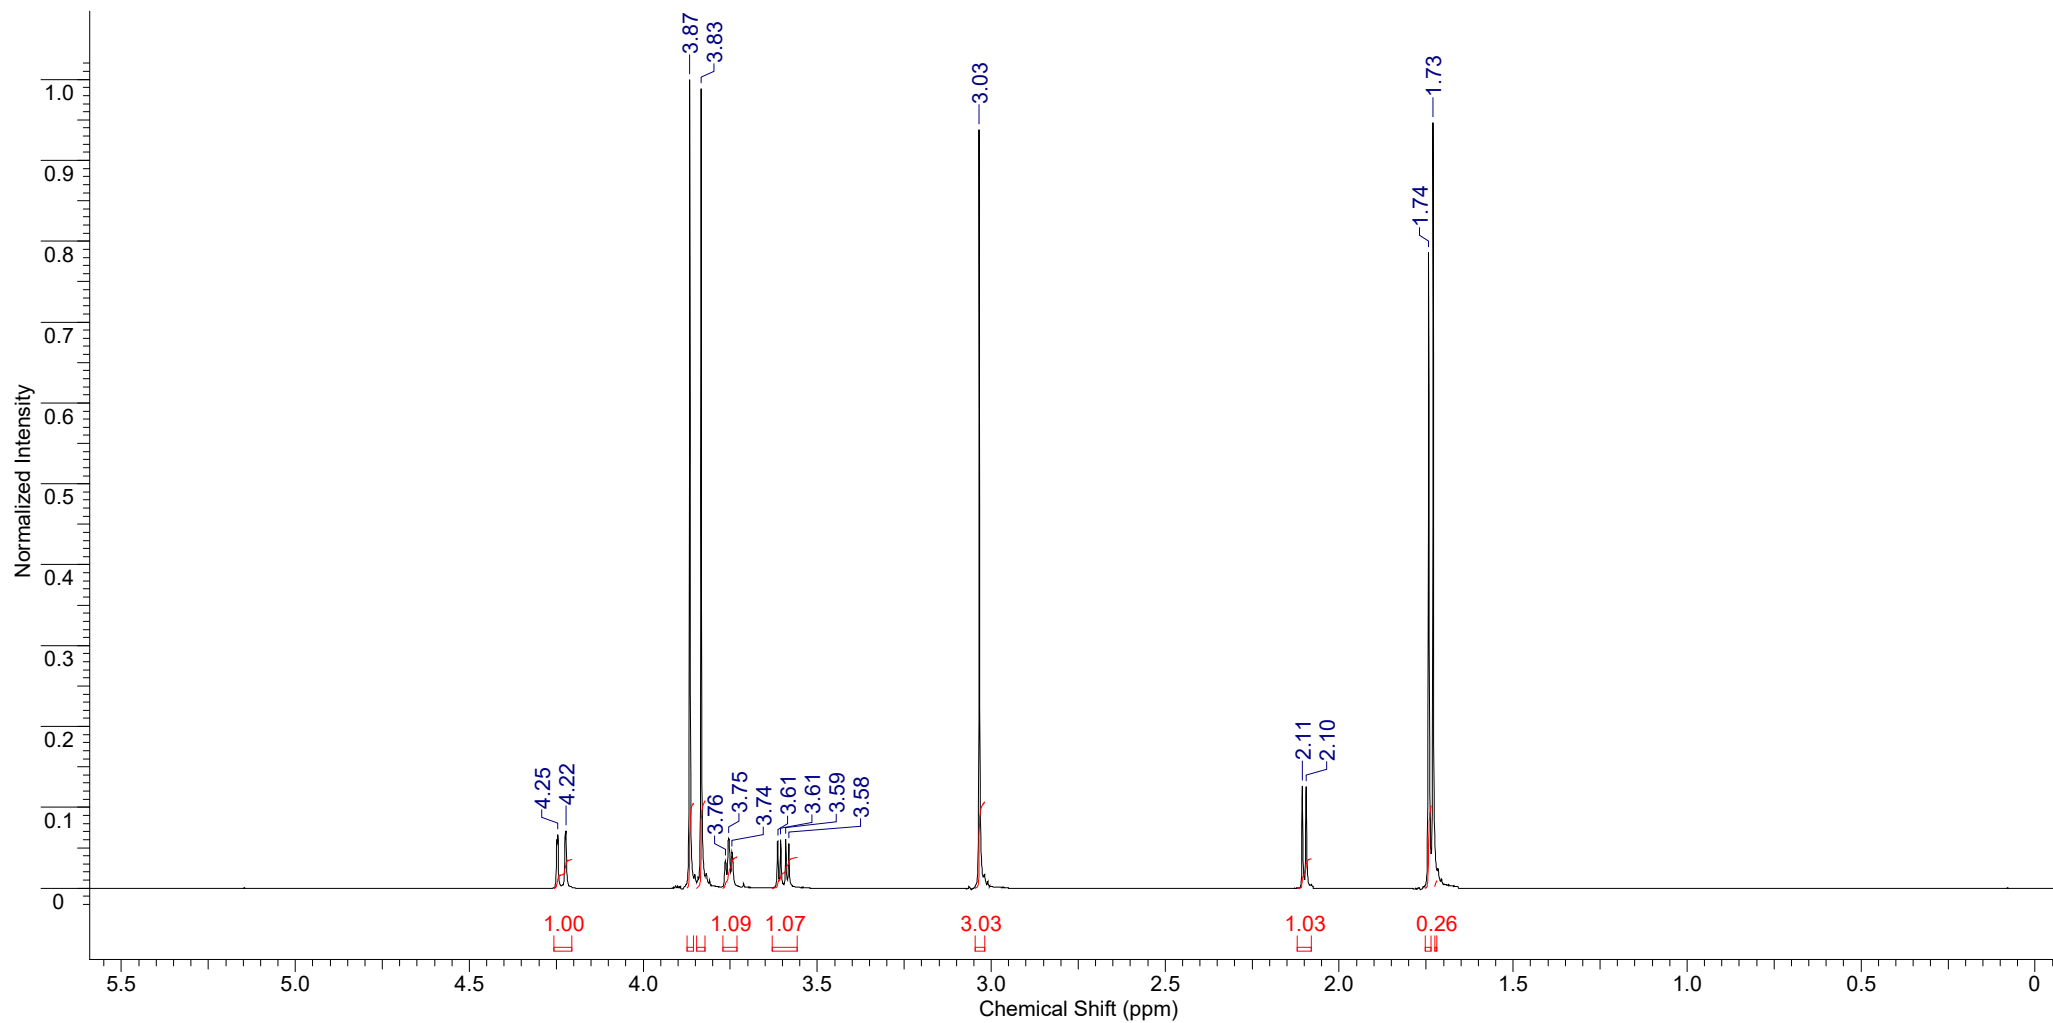

<sup>13</sup>C NMR spectra for 2b.

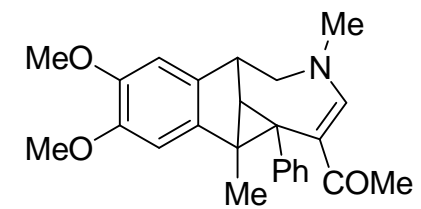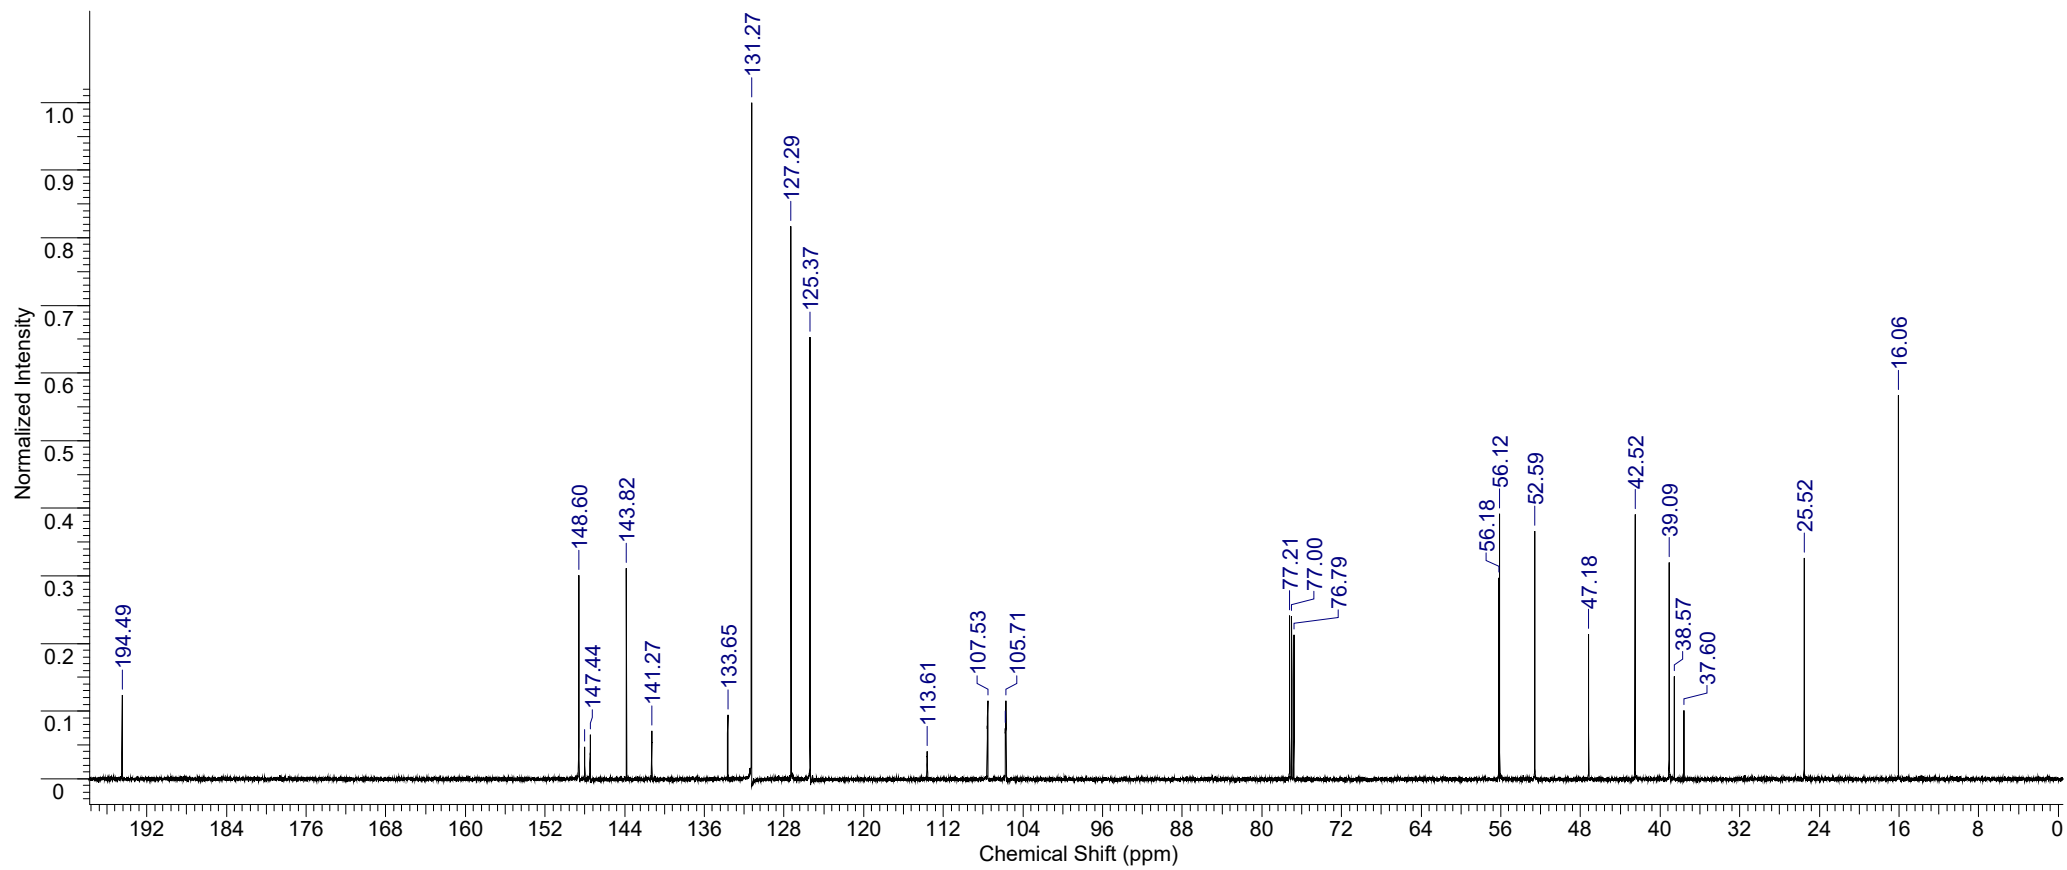

<sup>13</sup>C NMR spectra for 2b.

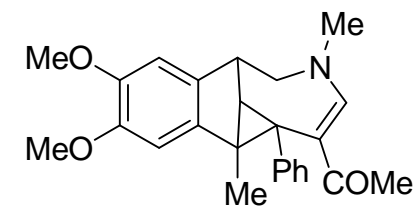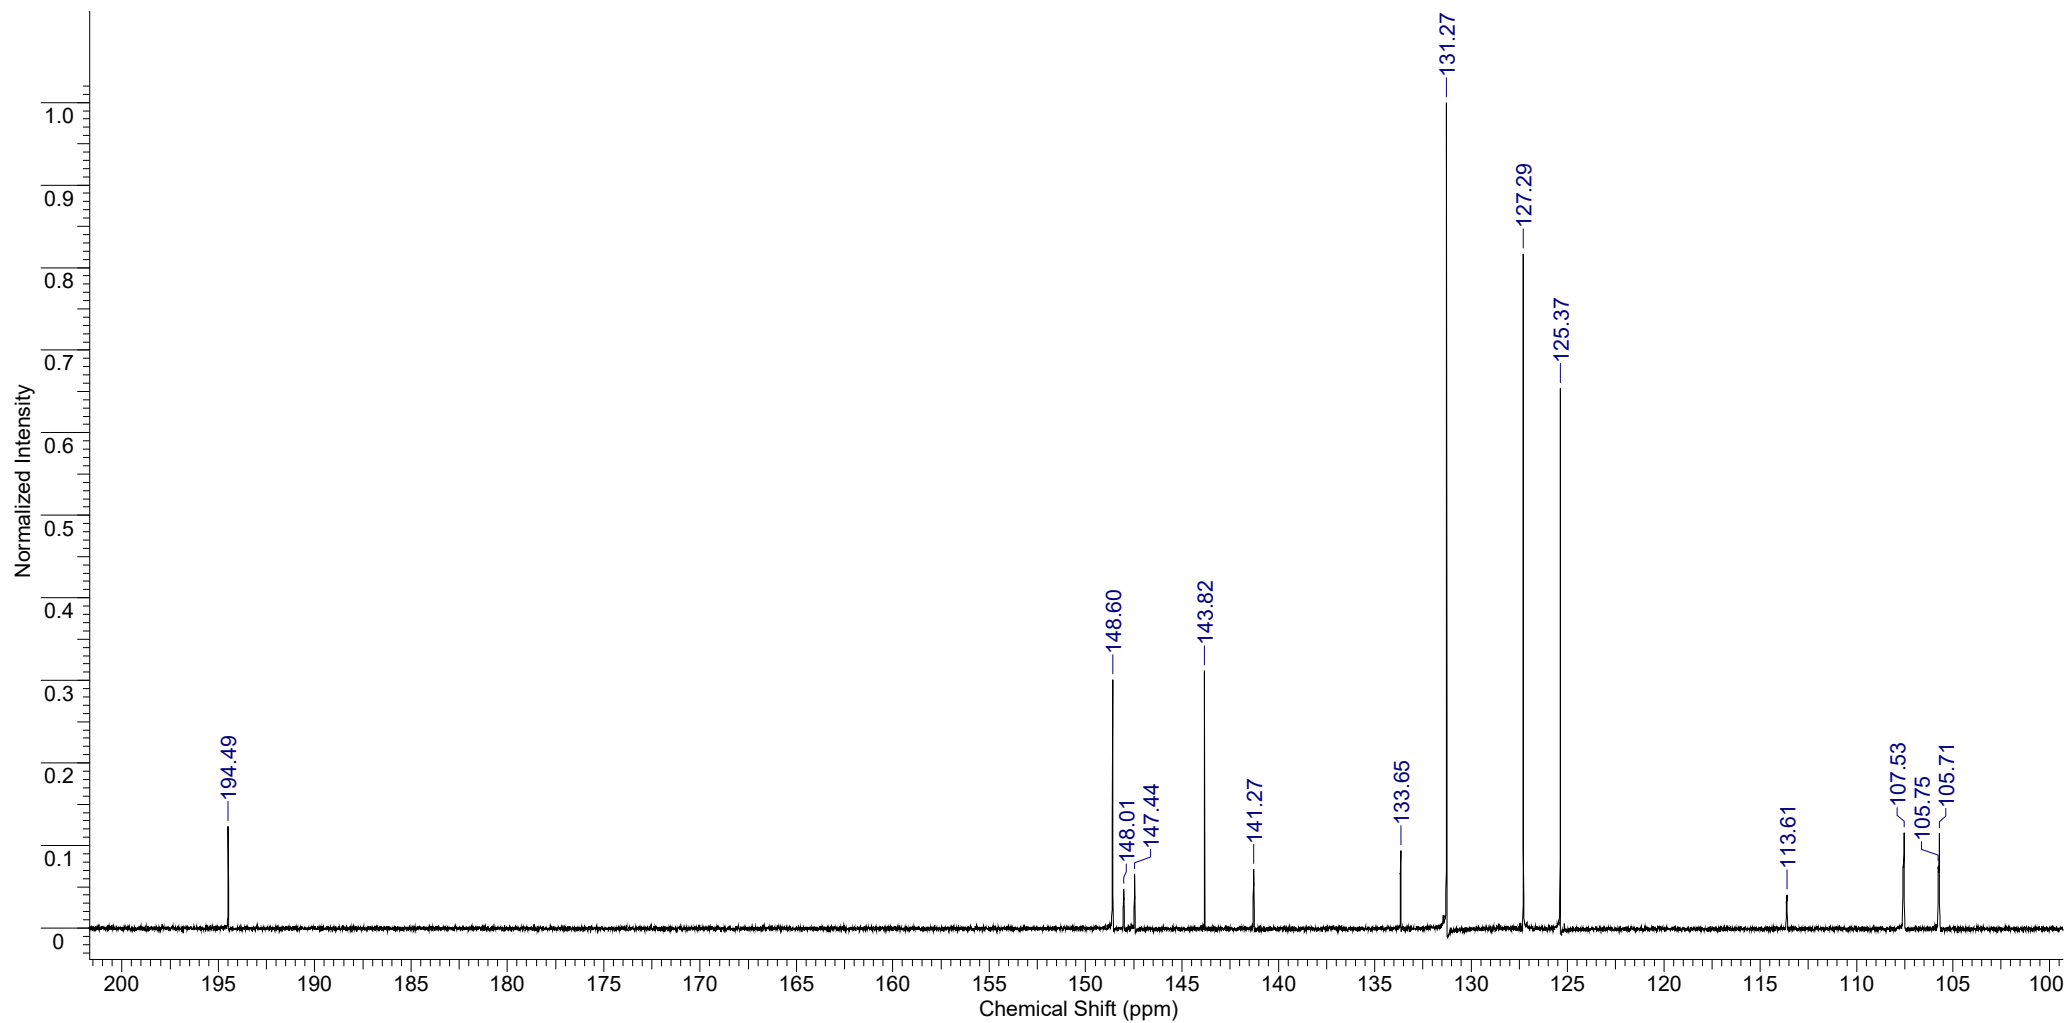



<sup>13</sup>C NMR spectra for 2b.

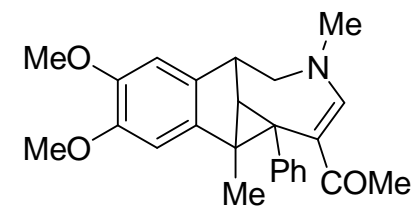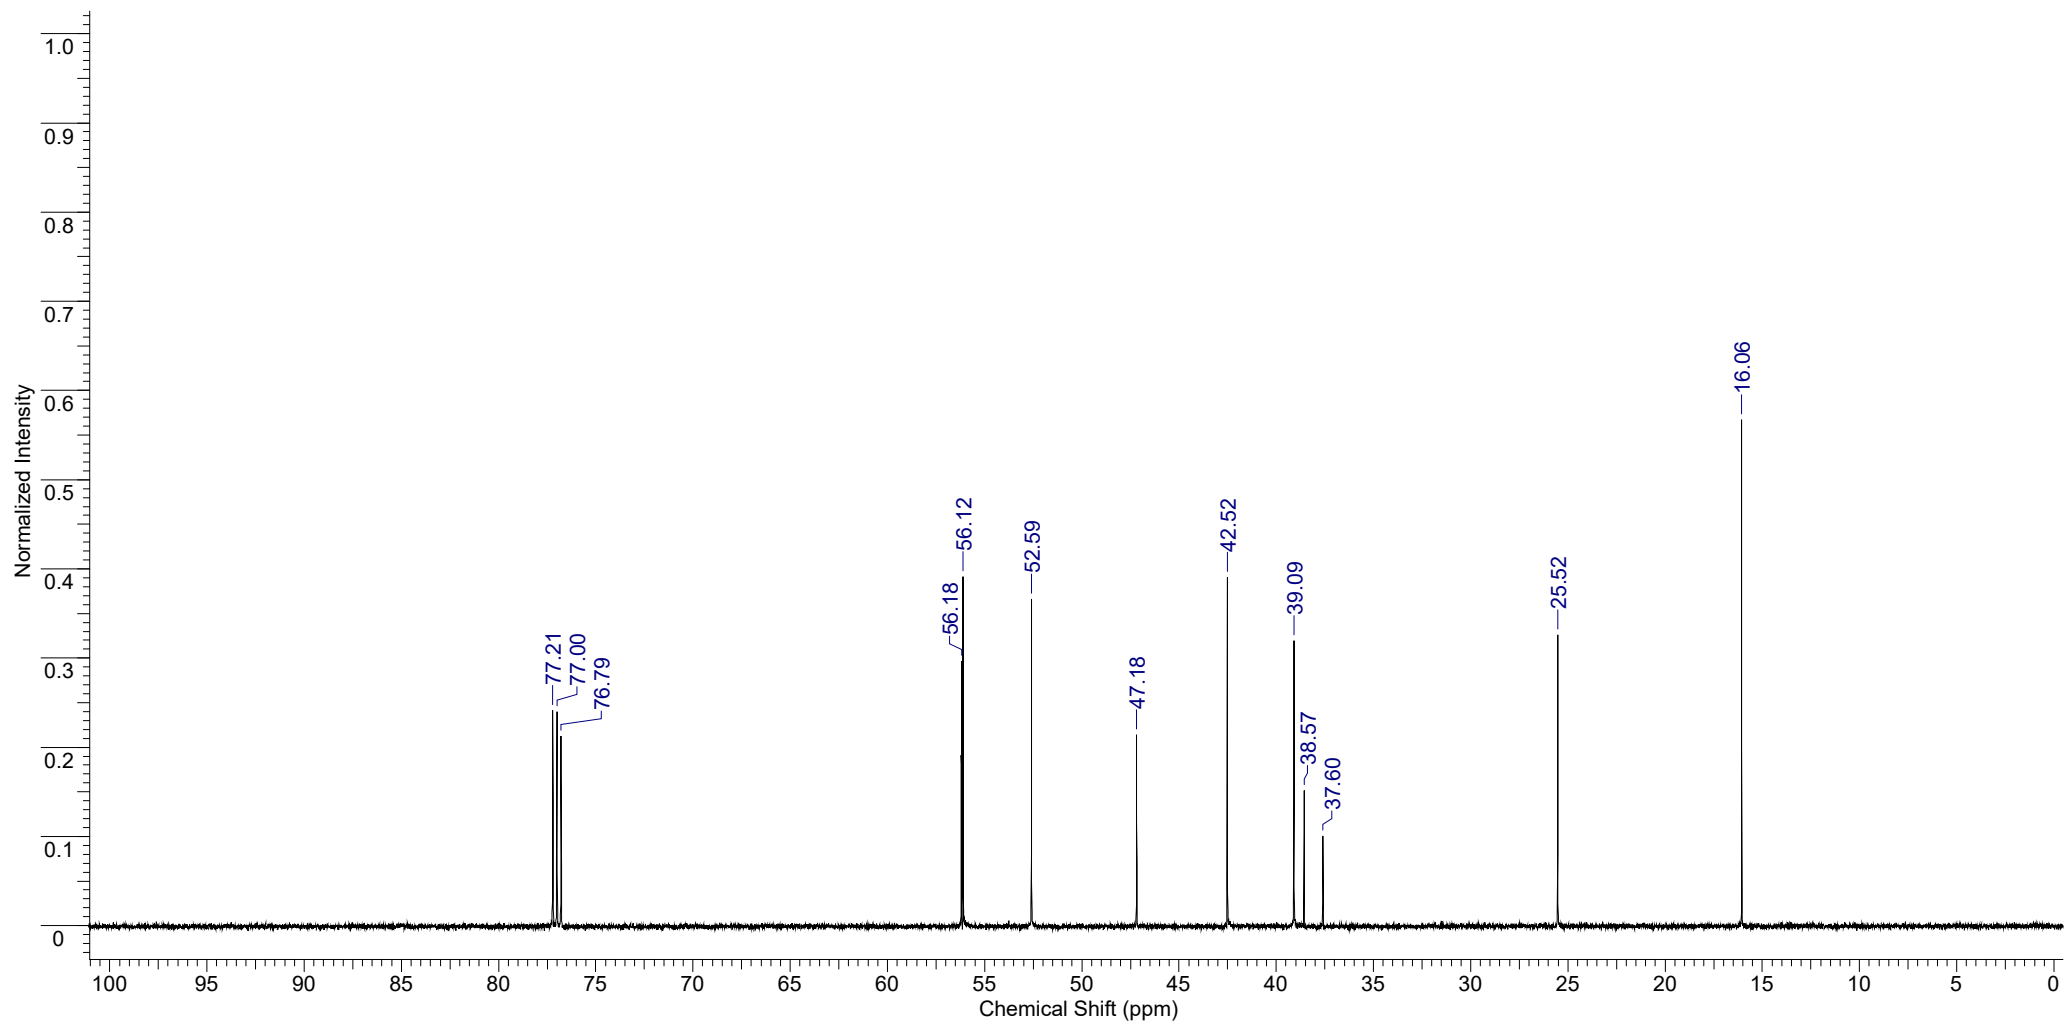

Methyl 4b-ethyl-6,7-dimethoxy-2-methyl-4a-phenyl-1,2,4a,4b,8b,8c-hexahydro-2-azabenzocyclopropa[cd]azulene-4-carboxylate (2c)

$^1\text{H}$  NMR spectra for 2c.

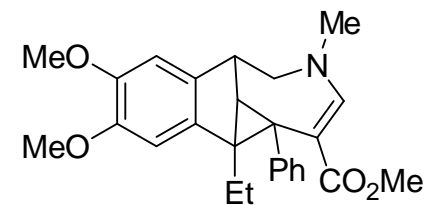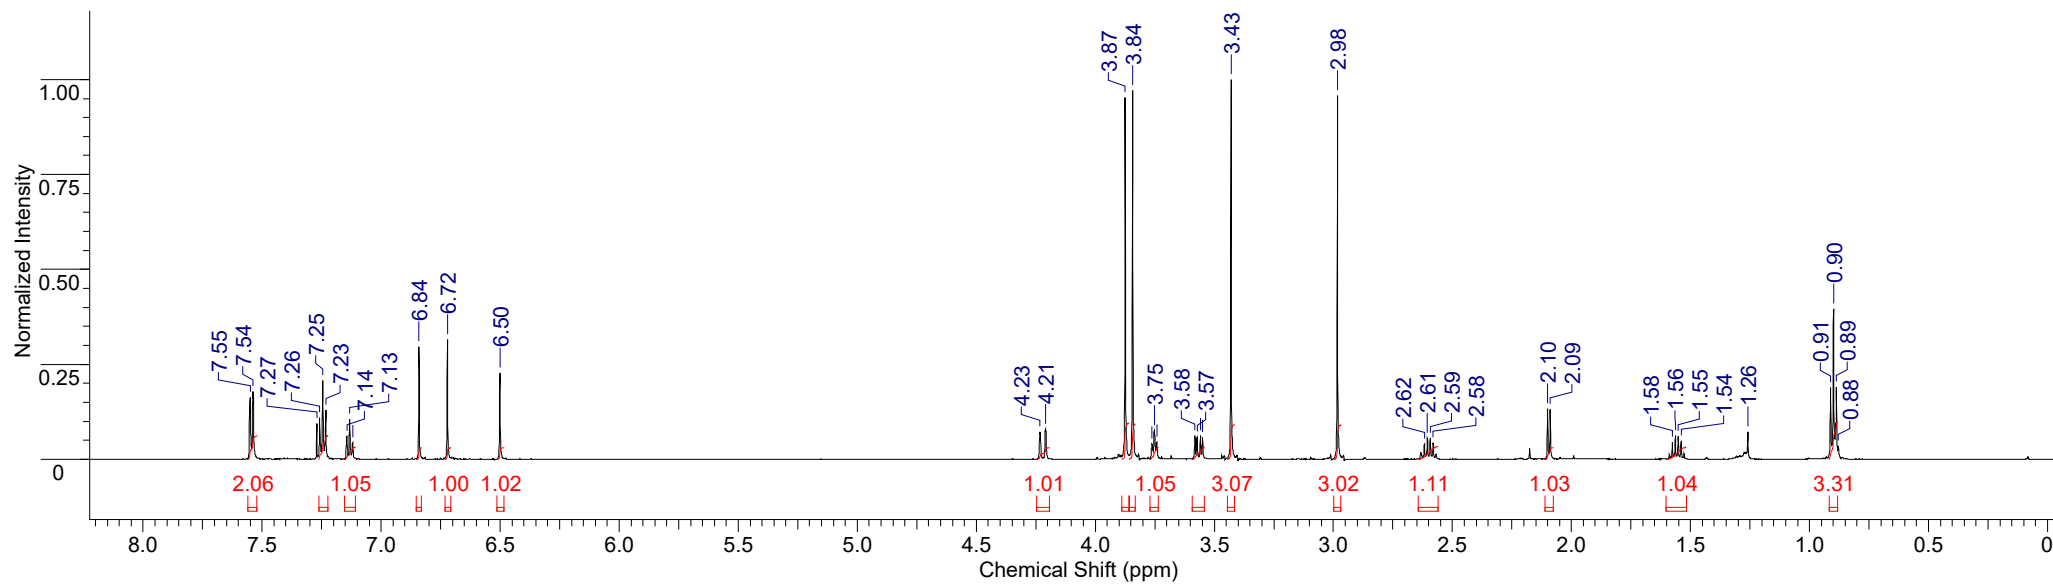

<sup>1</sup>H NMR spectra for 2c.

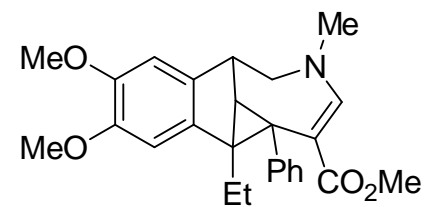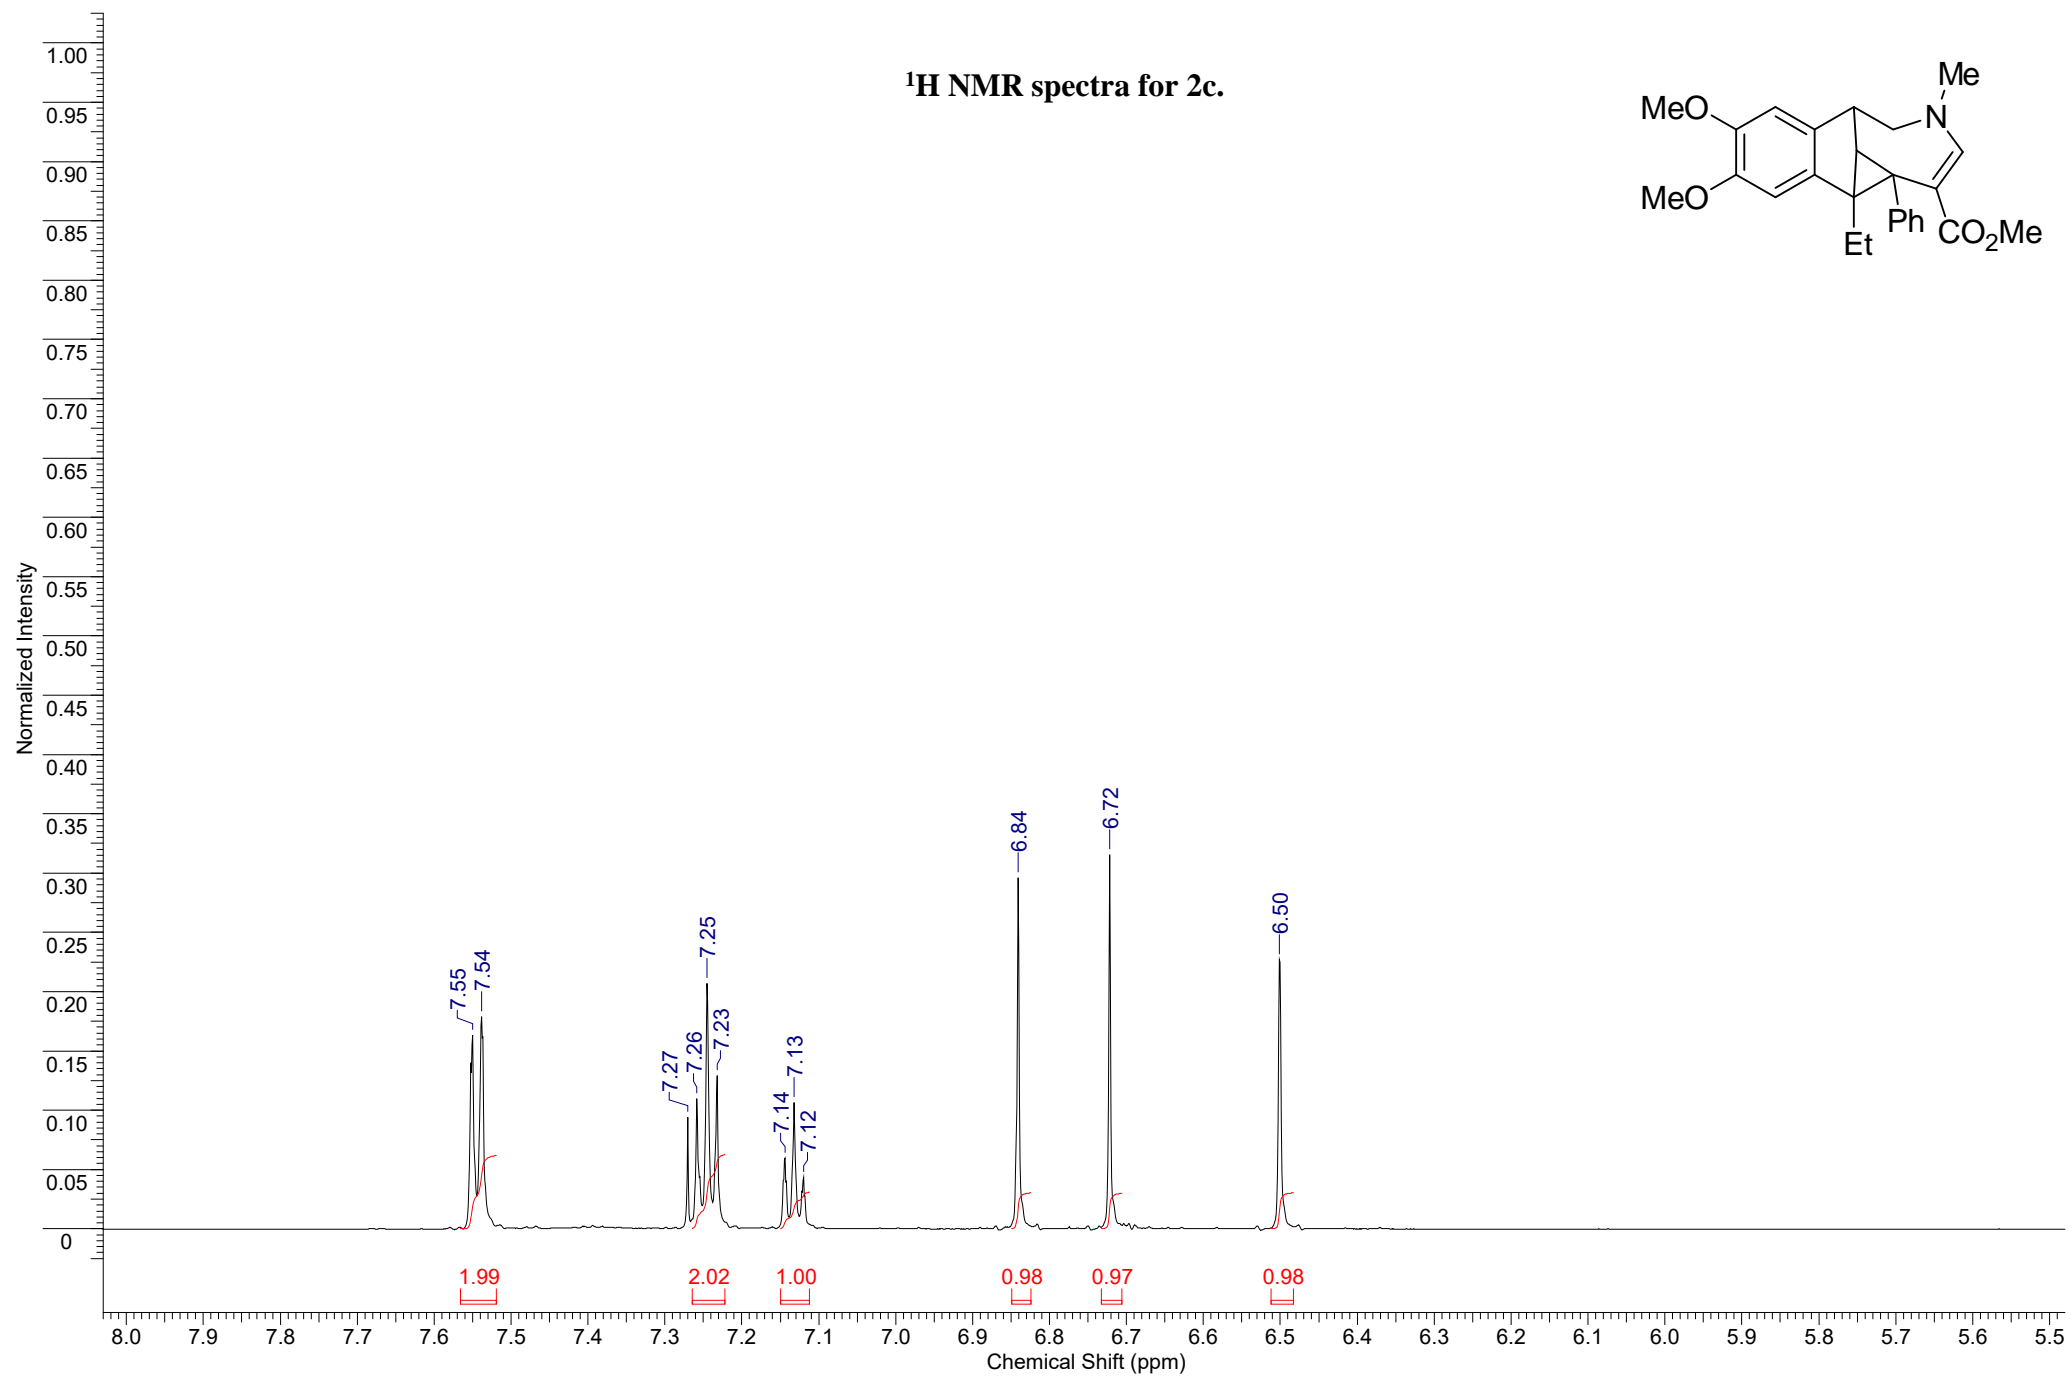

<sup>1</sup>H NMR spectra for 2c.

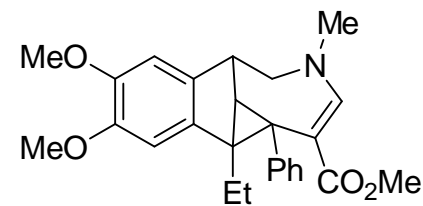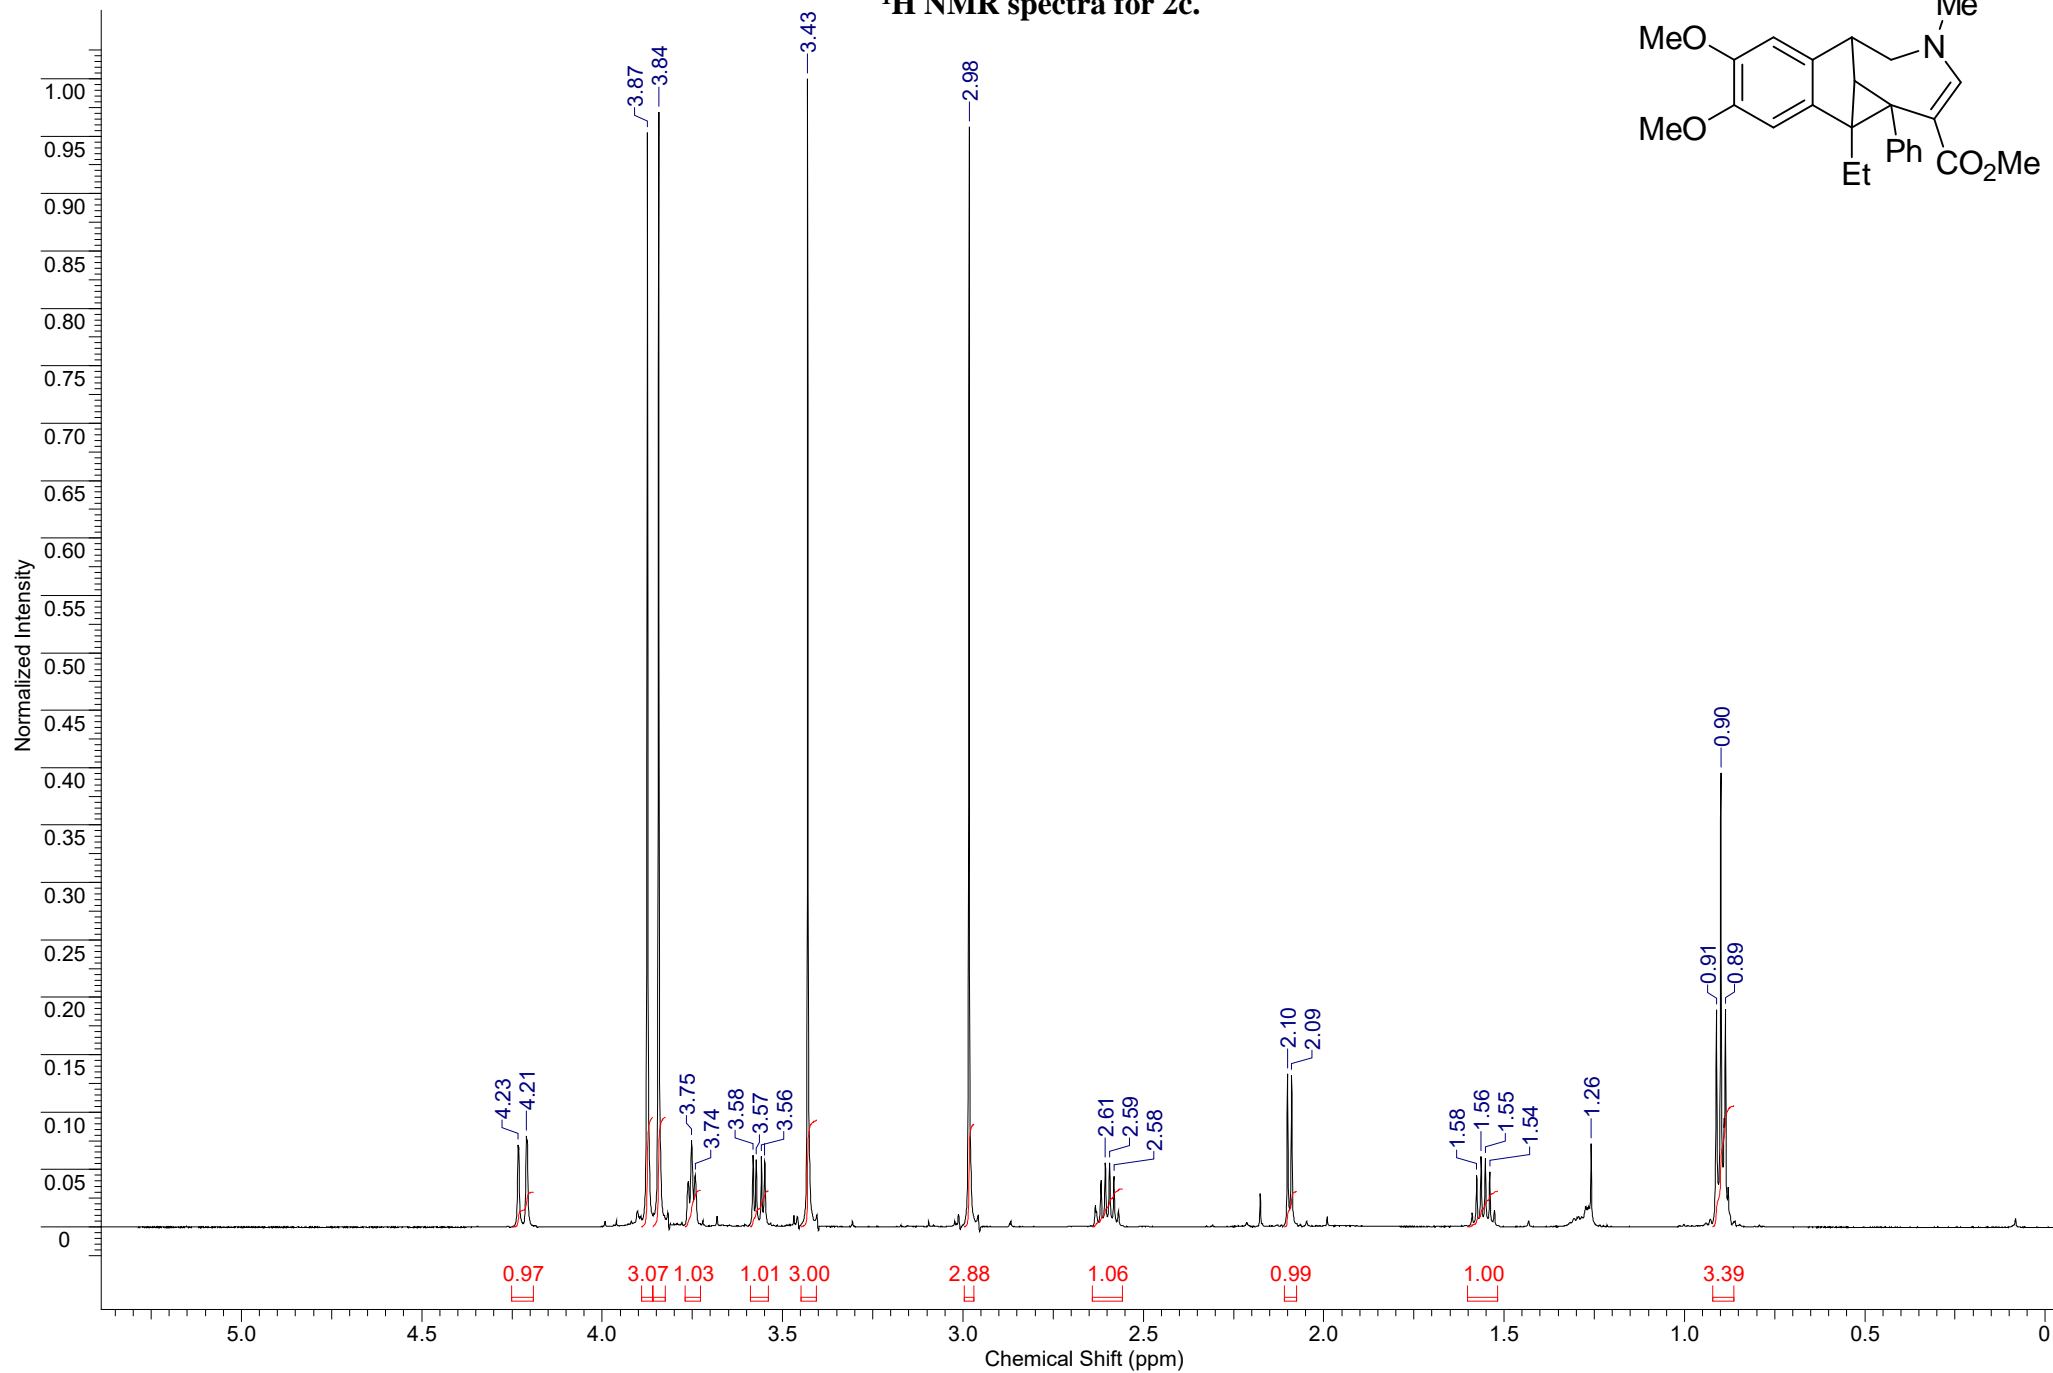

<sup>1</sup>H NMR spectra for 2c.

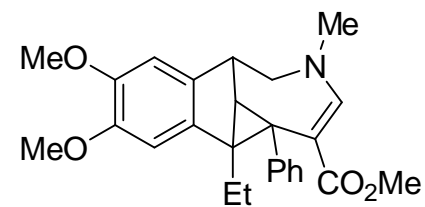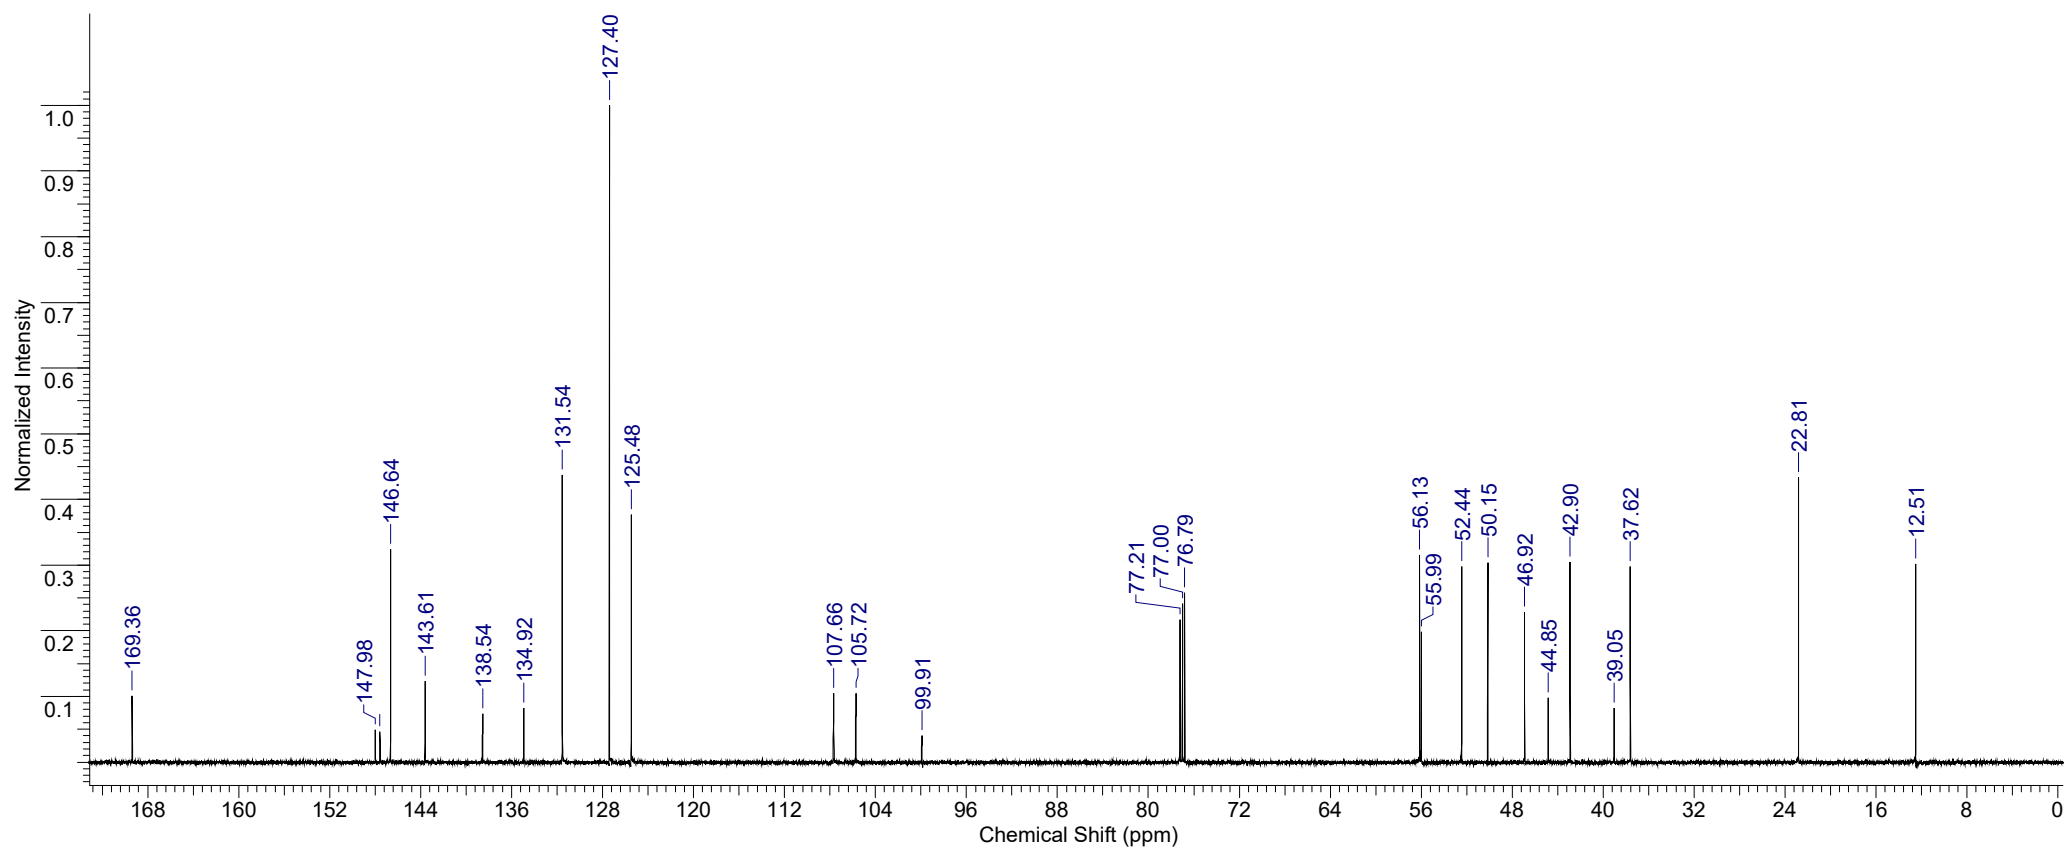

<sup>13</sup>C NMR spectra for 2c.

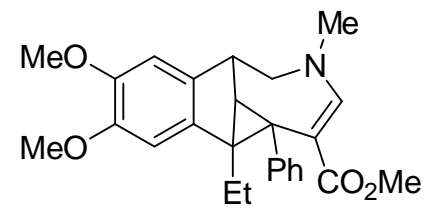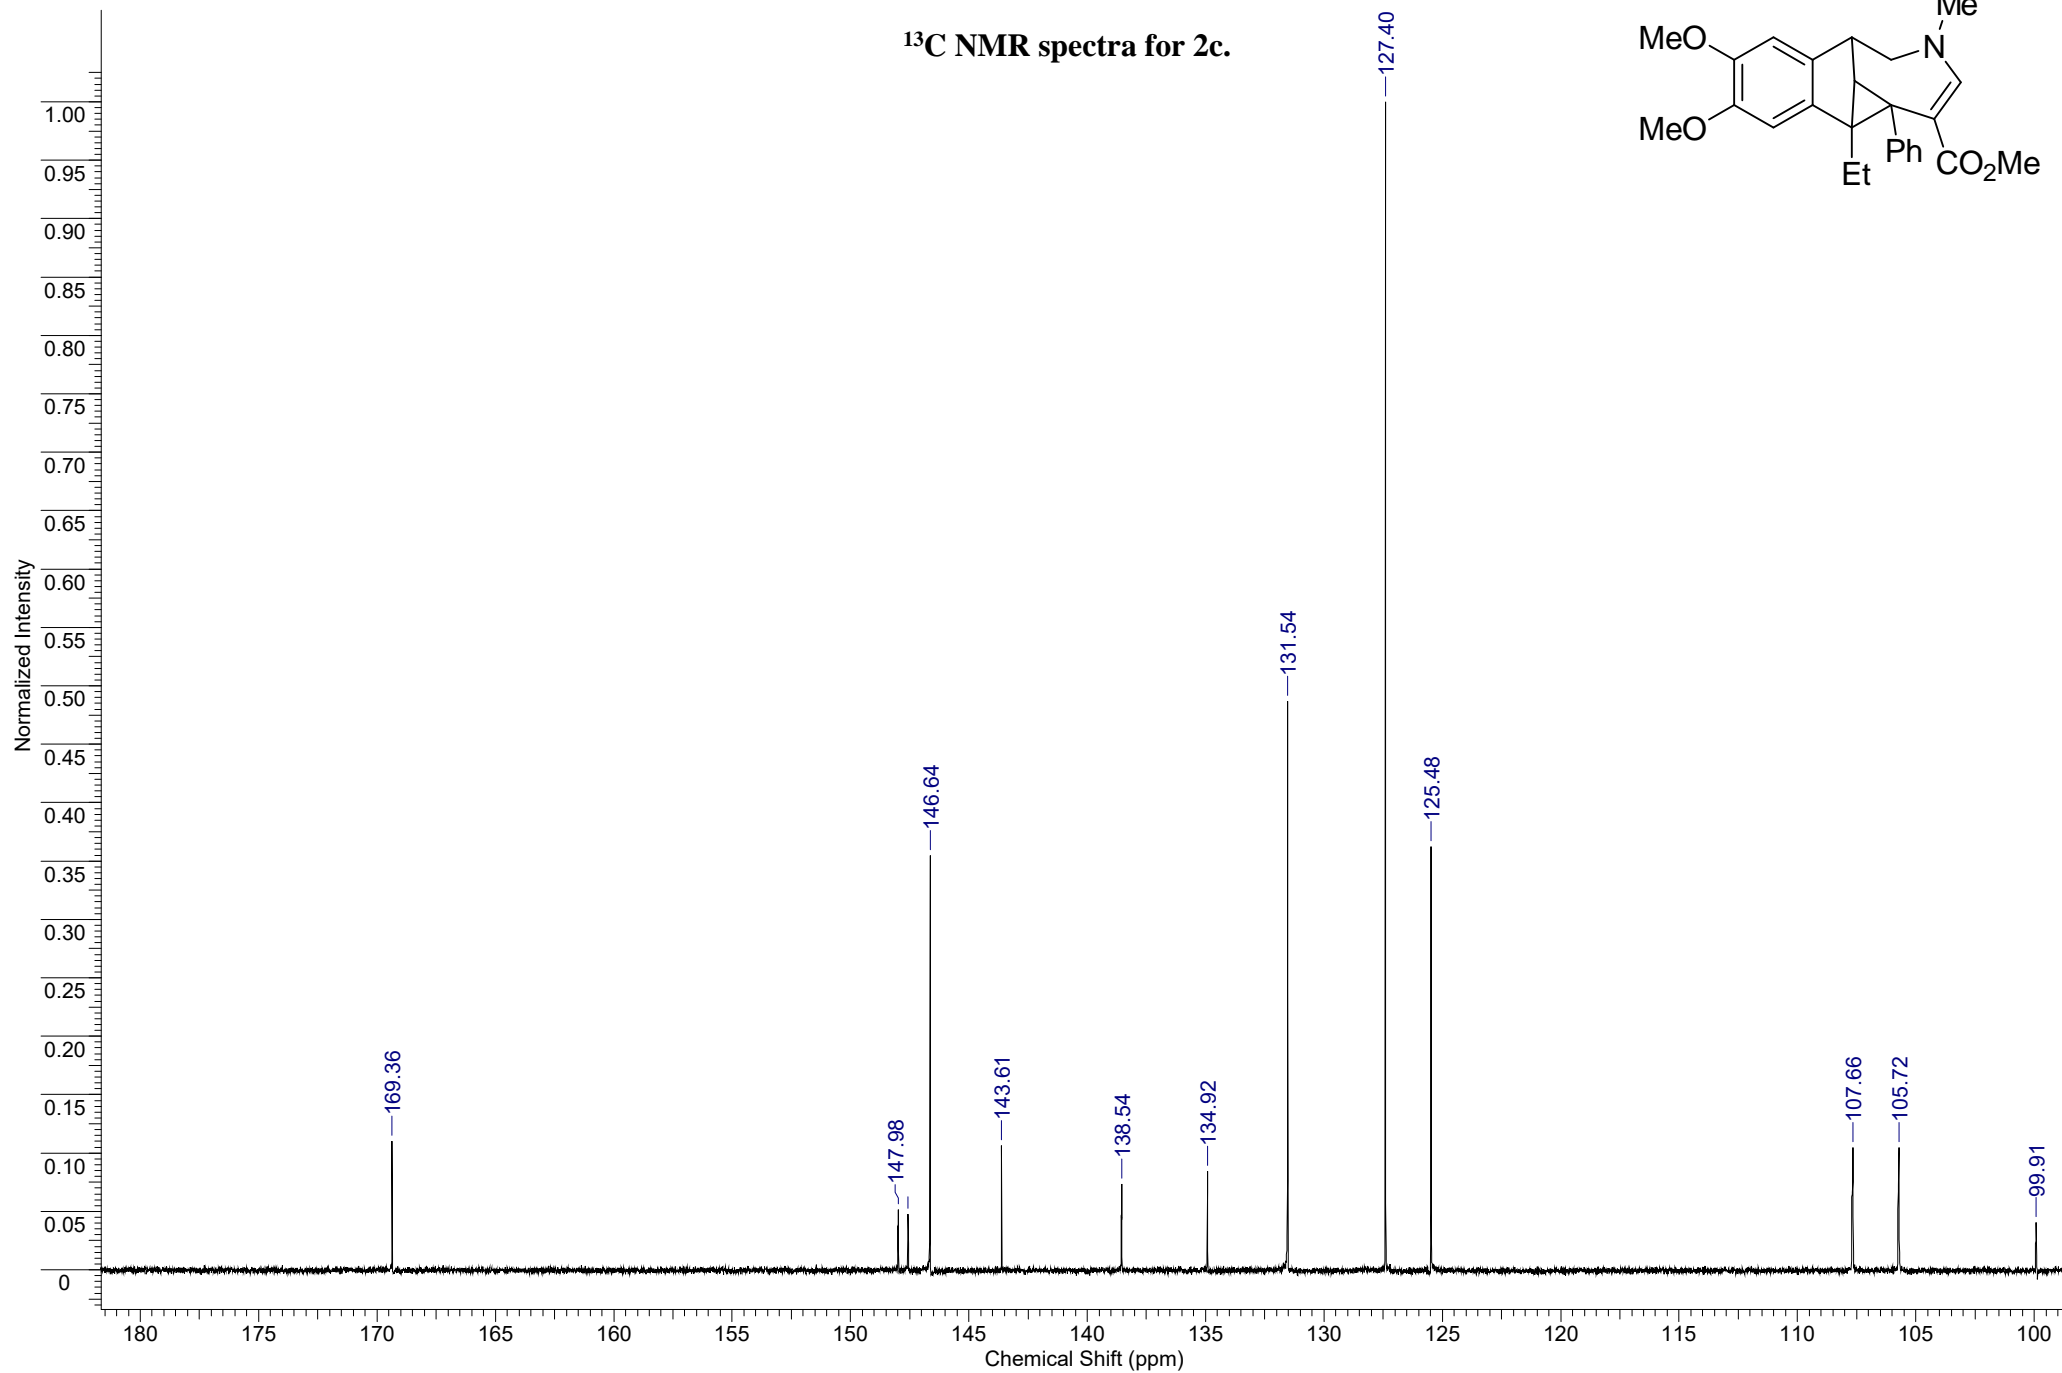

<sup>13</sup>C NMR spectra for 2c.

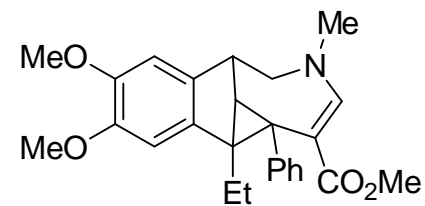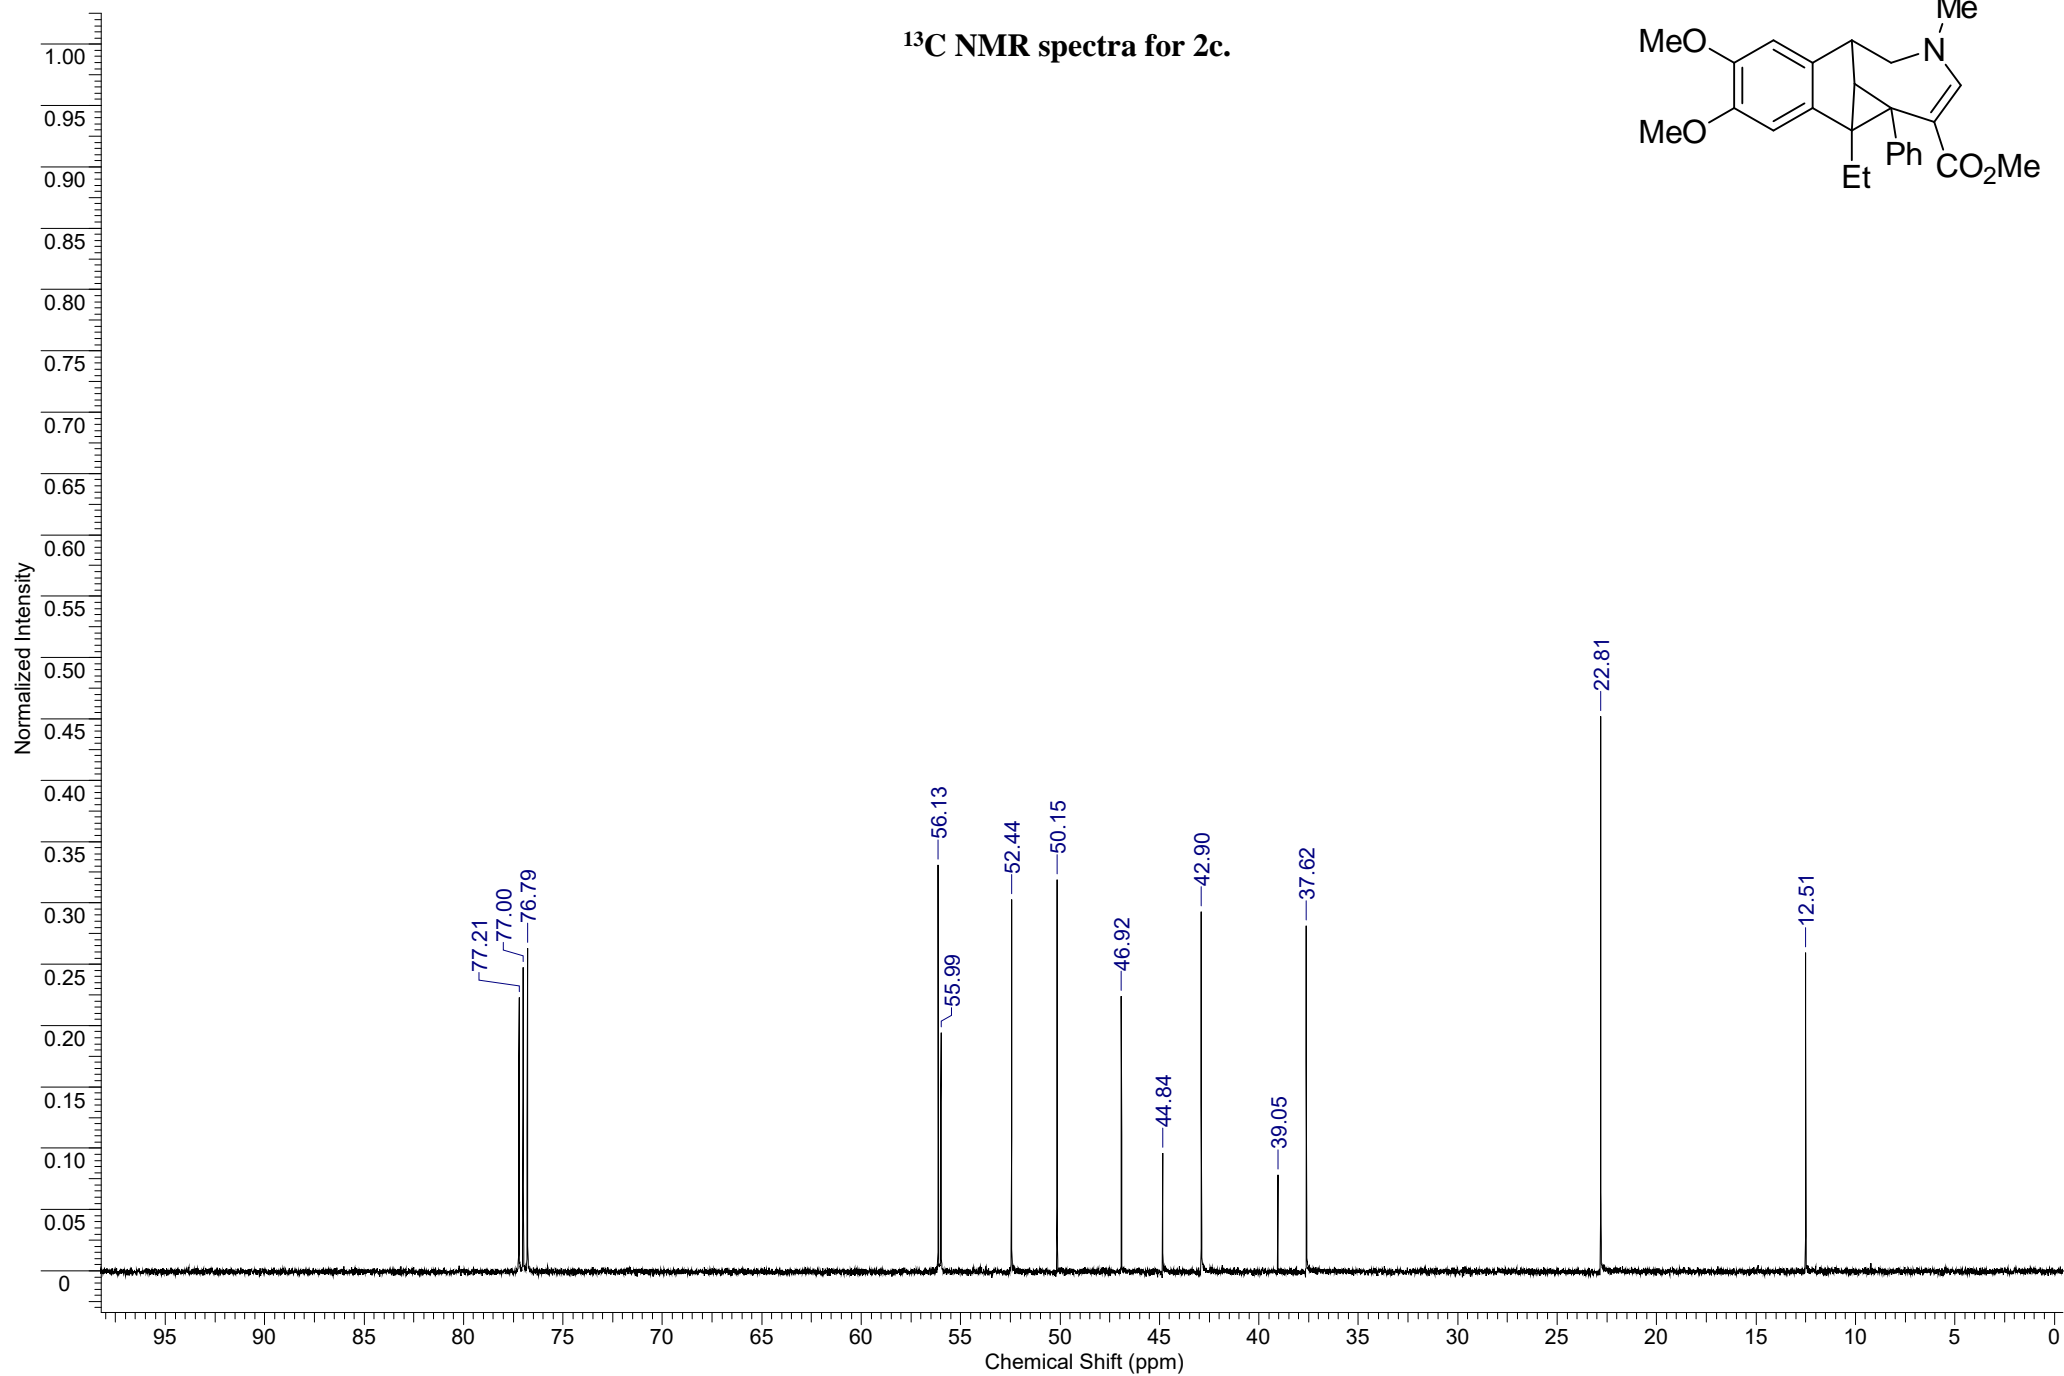

Methyl 6,7-dimethoxy-2-methyl-4b-(2-methylpropyl)-4a-phenyl-1,2,4a,4b,8b,8c-hexahydro-2-azabenzocyclopropa[cd]azulene-4-carboxylate (2e)

<sup>1</sup>H NMR spectra for 2e.

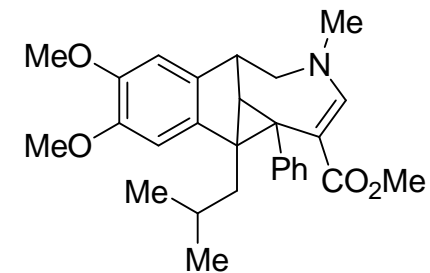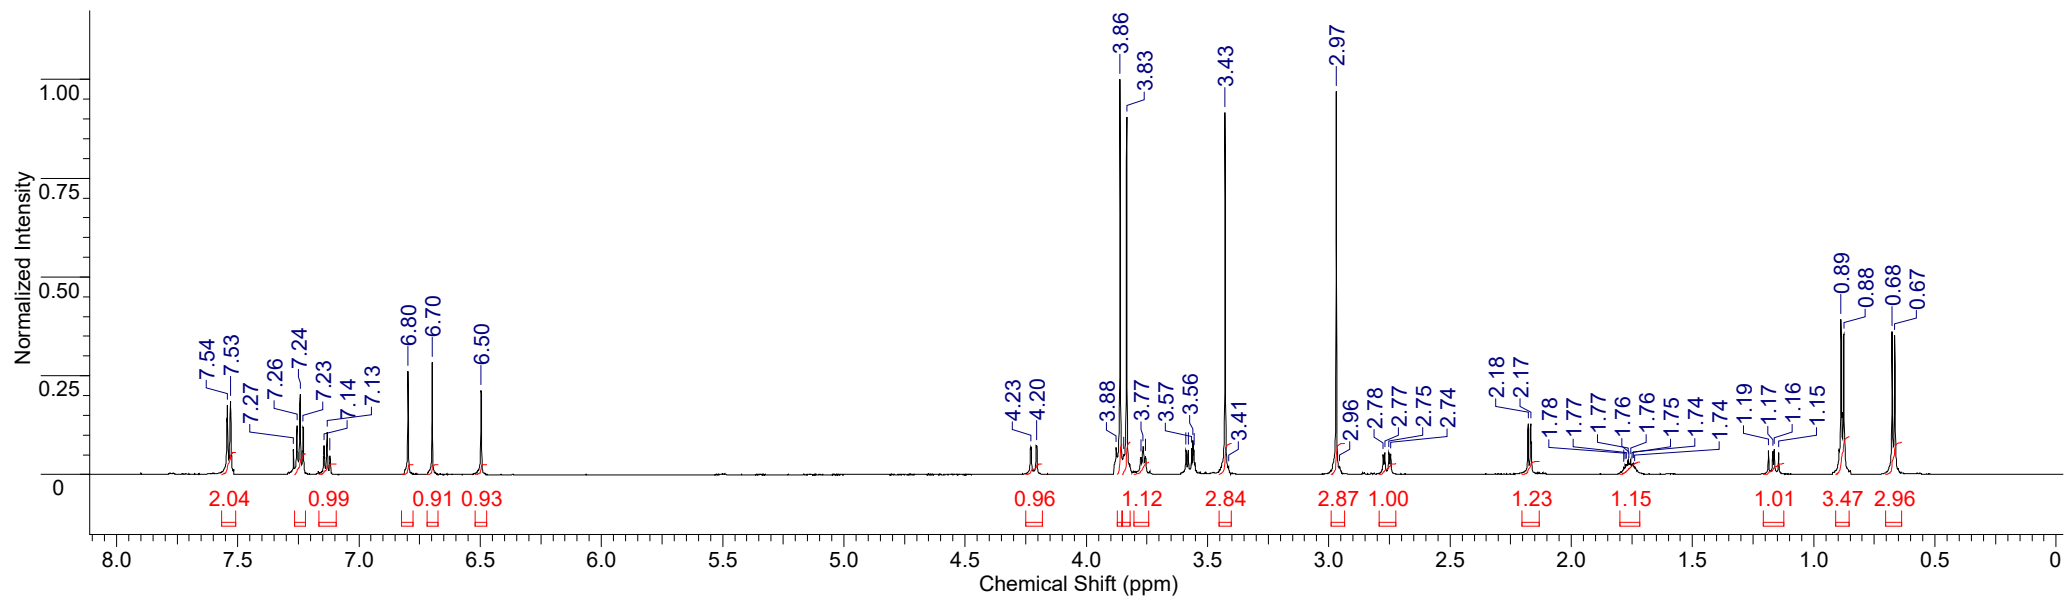



<sup>1</sup>H NMR spectra for 2e.

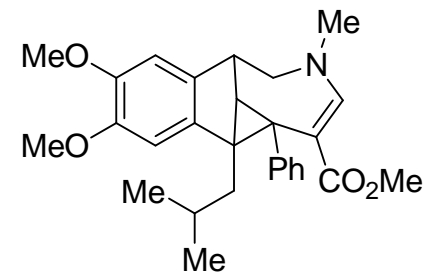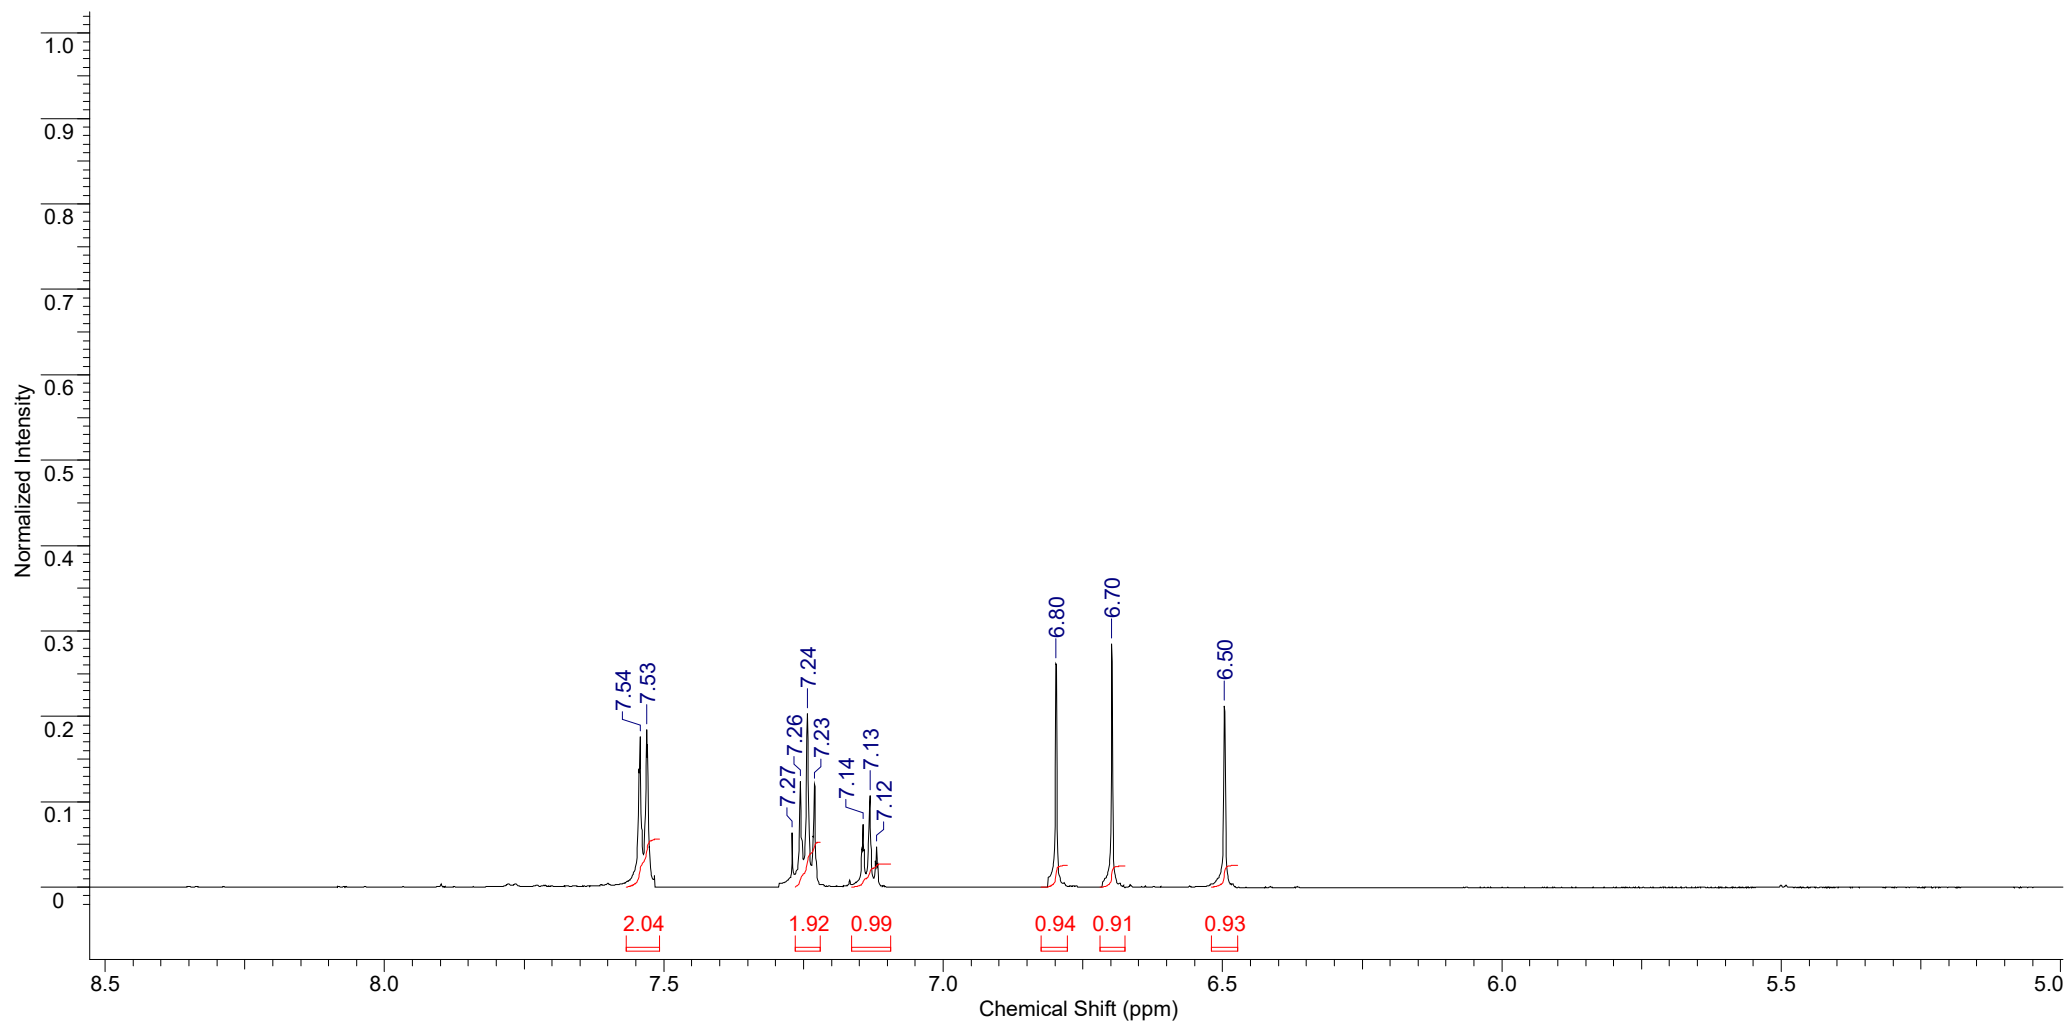

<sup>1</sup>H NMR spectra for 2e.

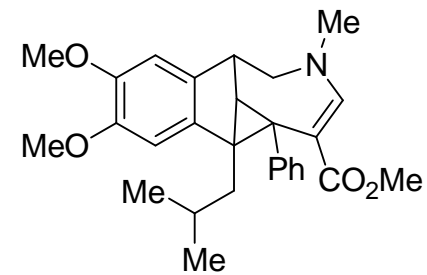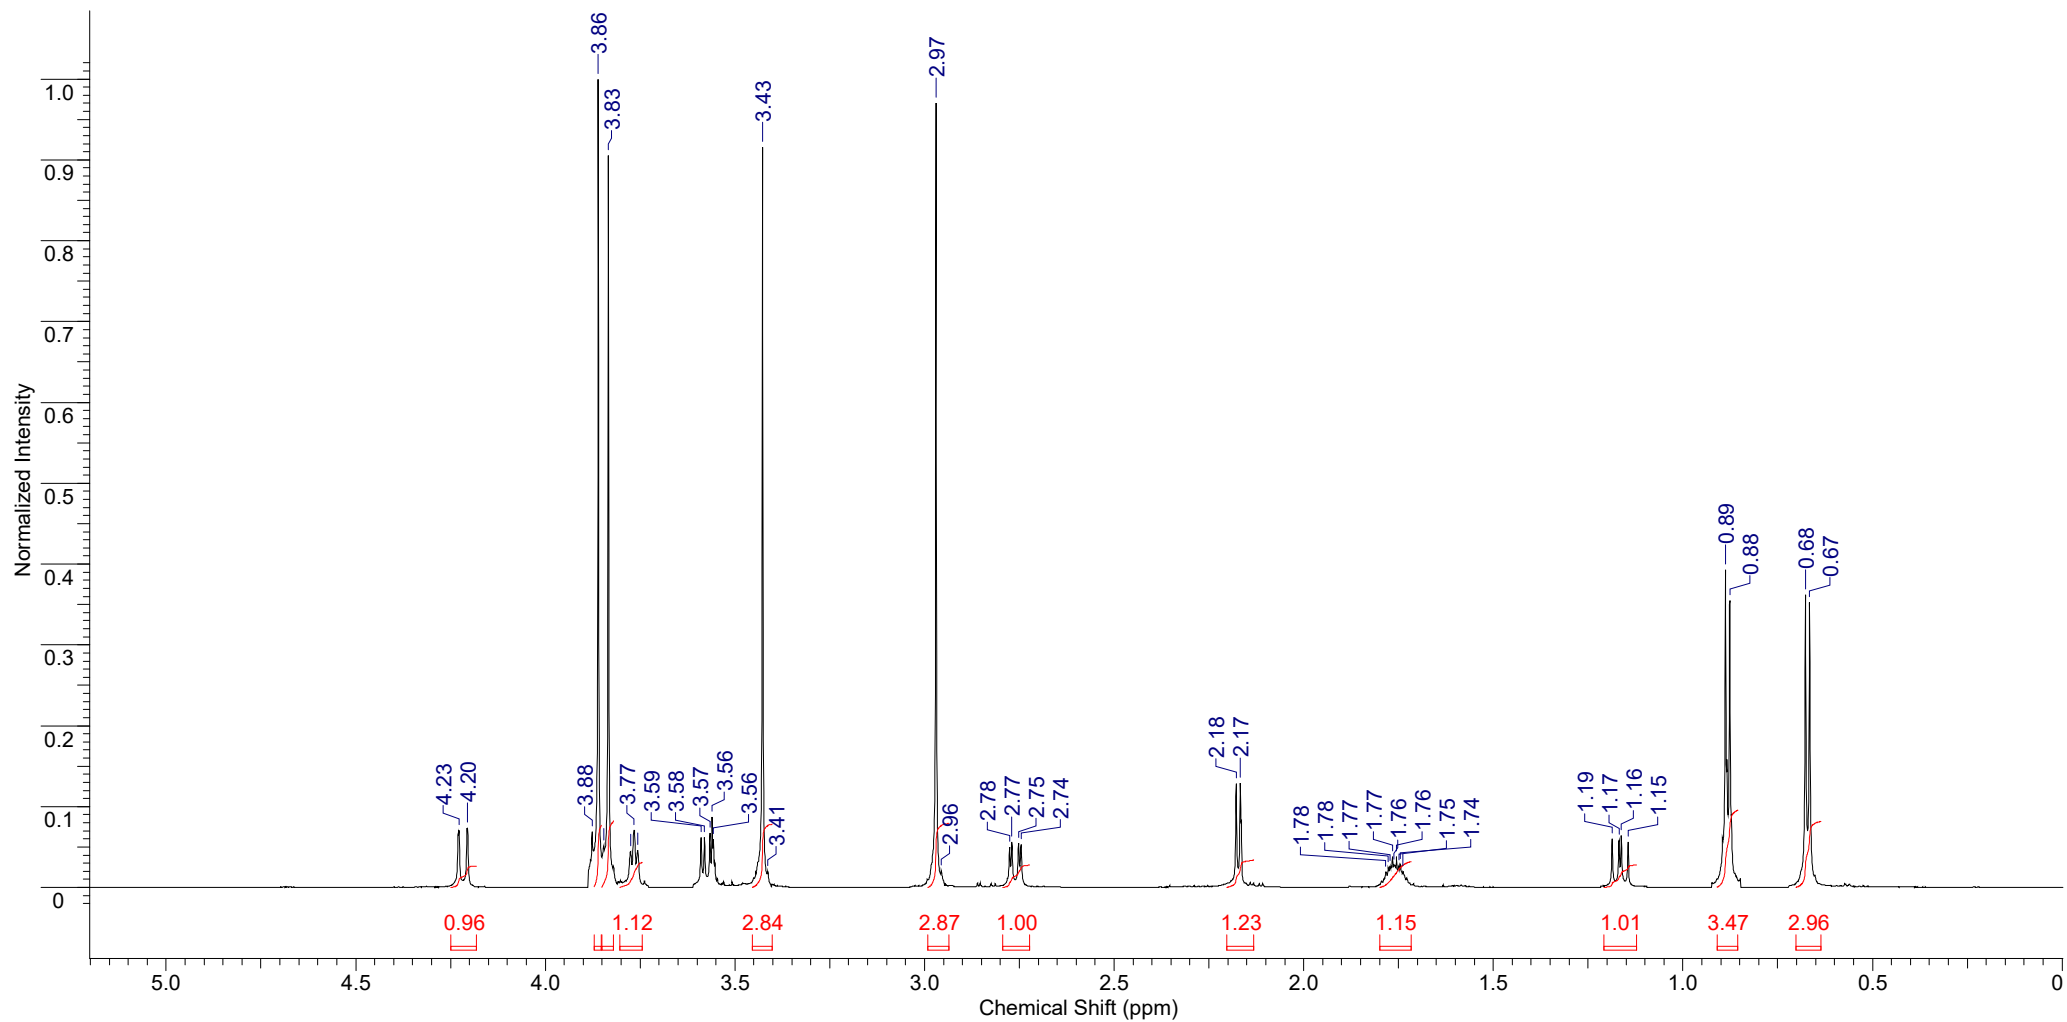

<sup>13</sup>C NMR spectra for 2e.

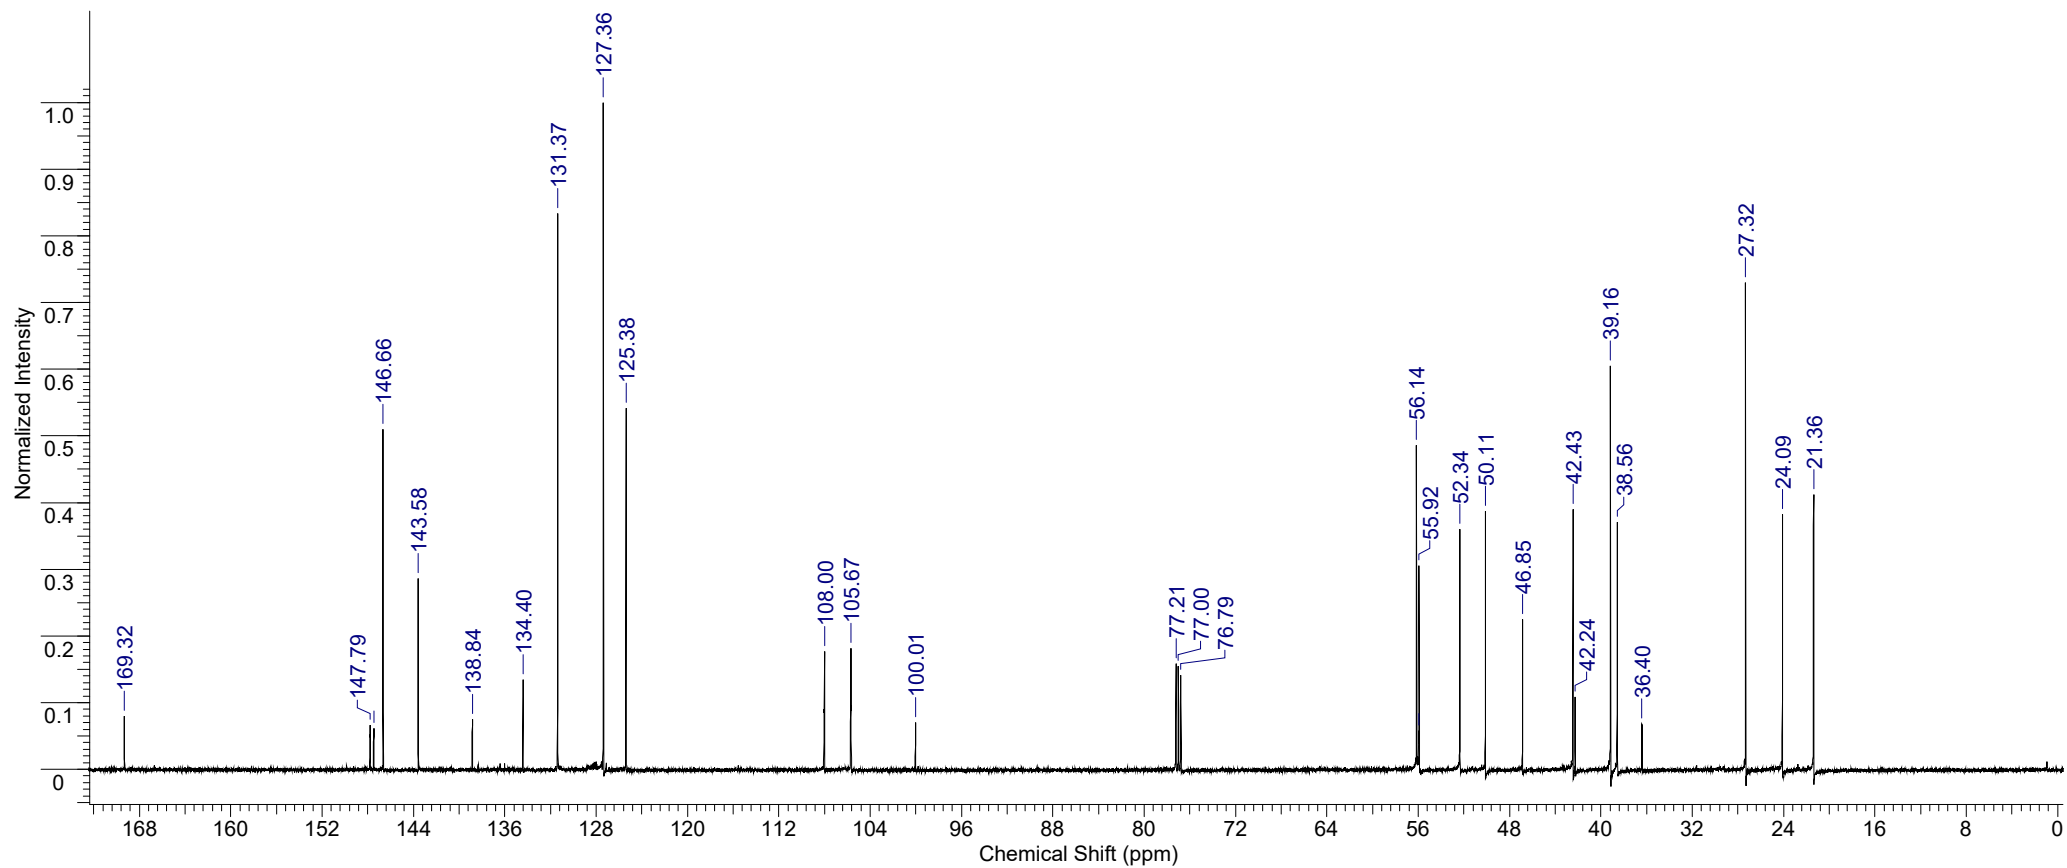

<sup>13</sup>C NMR spectra for 2e.

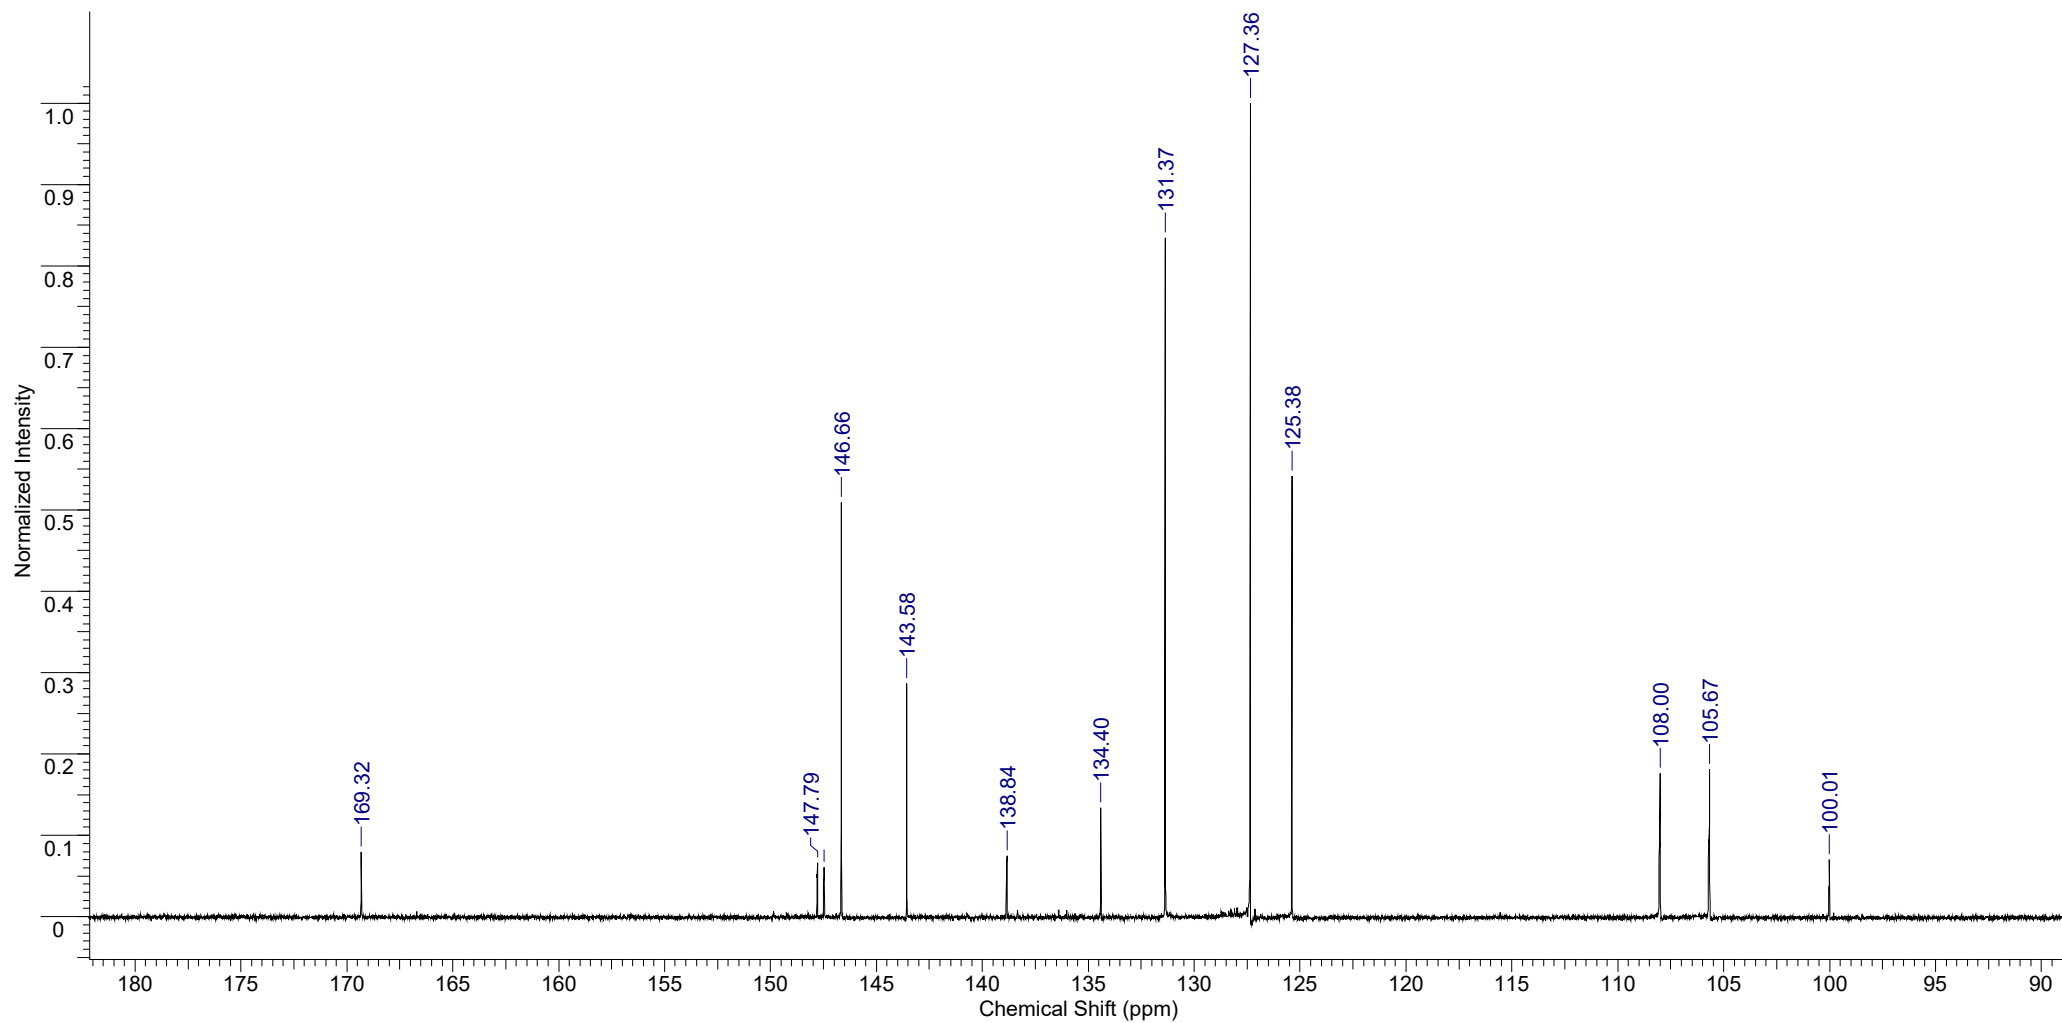

<sup>13</sup>C NMR spectra for 2e.

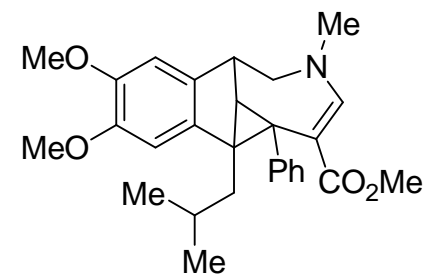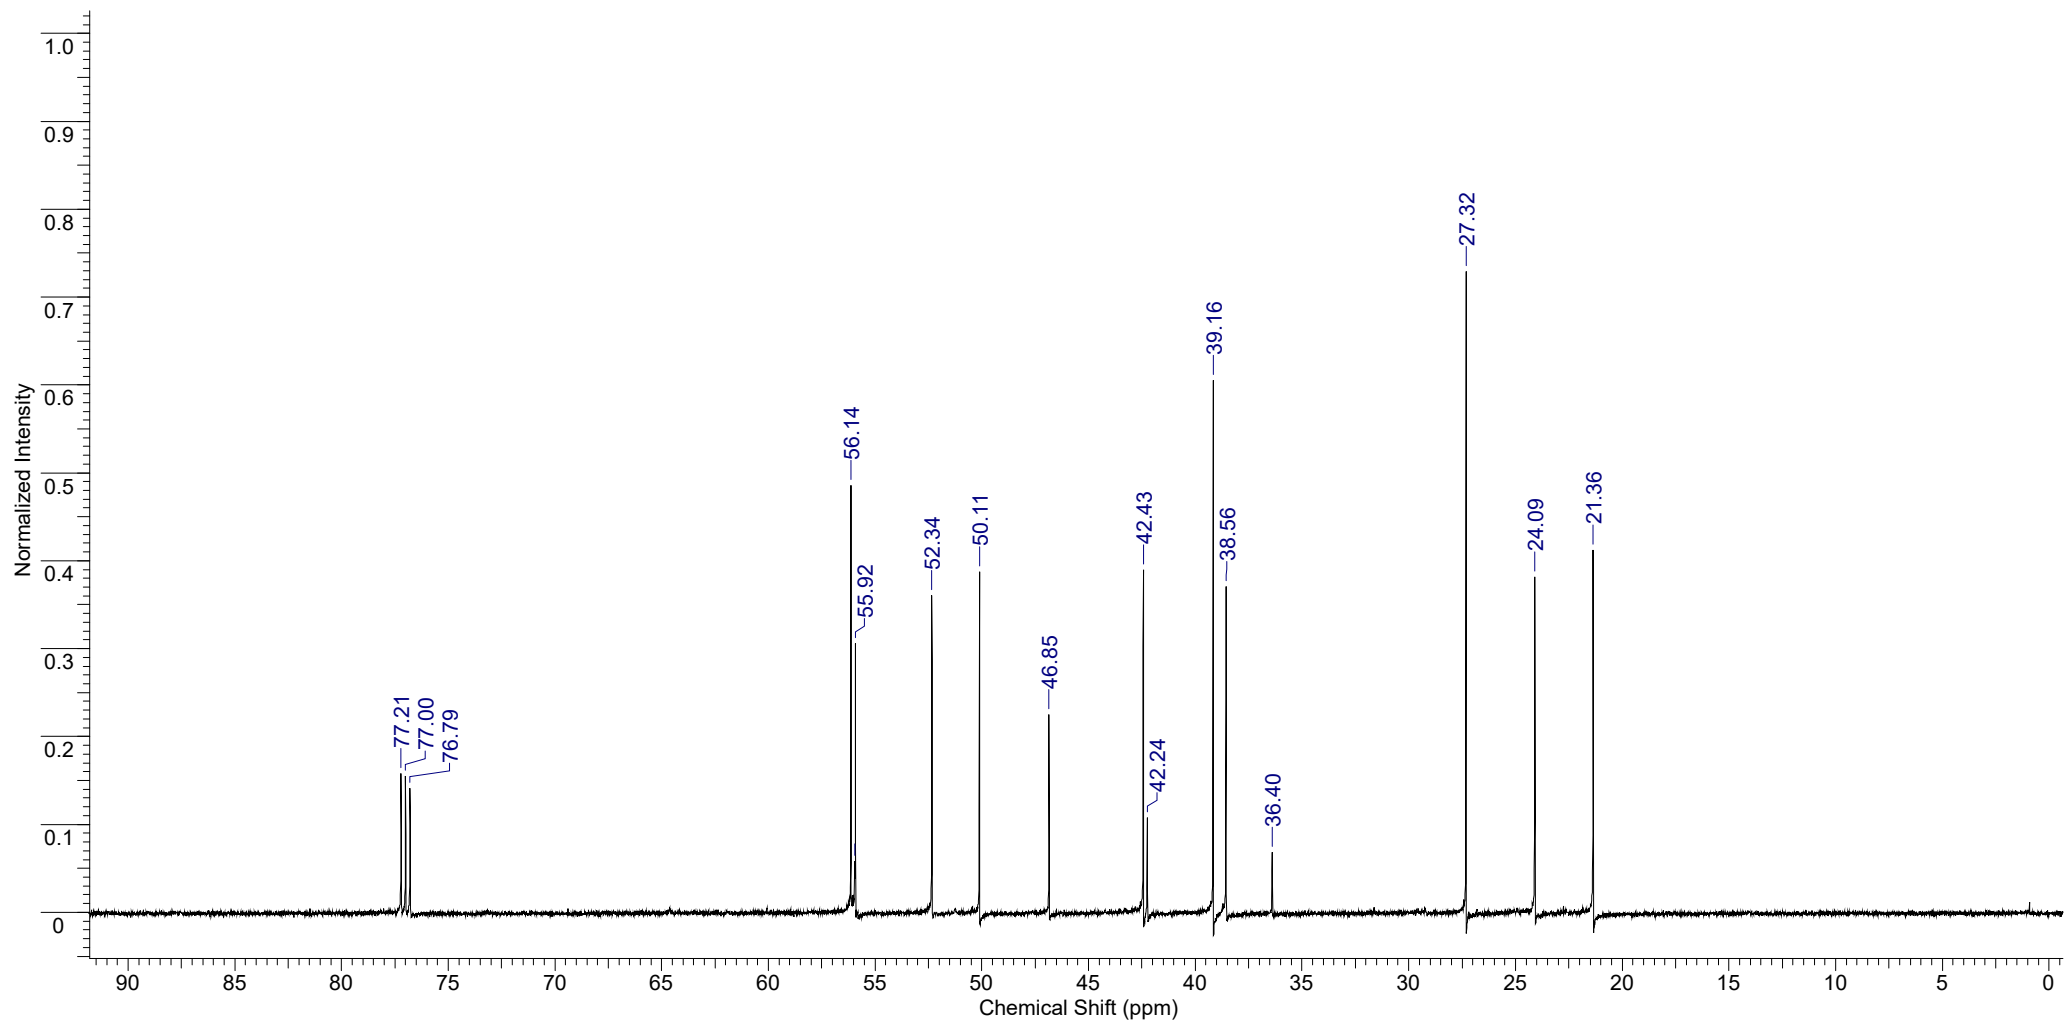

1-[6,7-dimethoxy-2-methyl-4b-(2-methylpropyl)-4a-phenyl-1,2,4a,4b,8b,8c-hexahydro-2-azabenzocyclopropa[cd]azulen-4-yl]ethanone (2f)

<sup>1</sup>H NMR spectra for 2f.

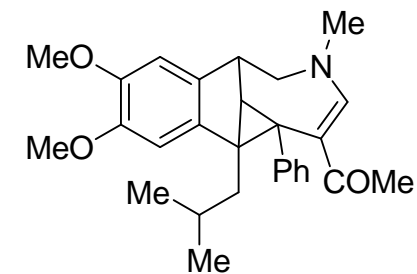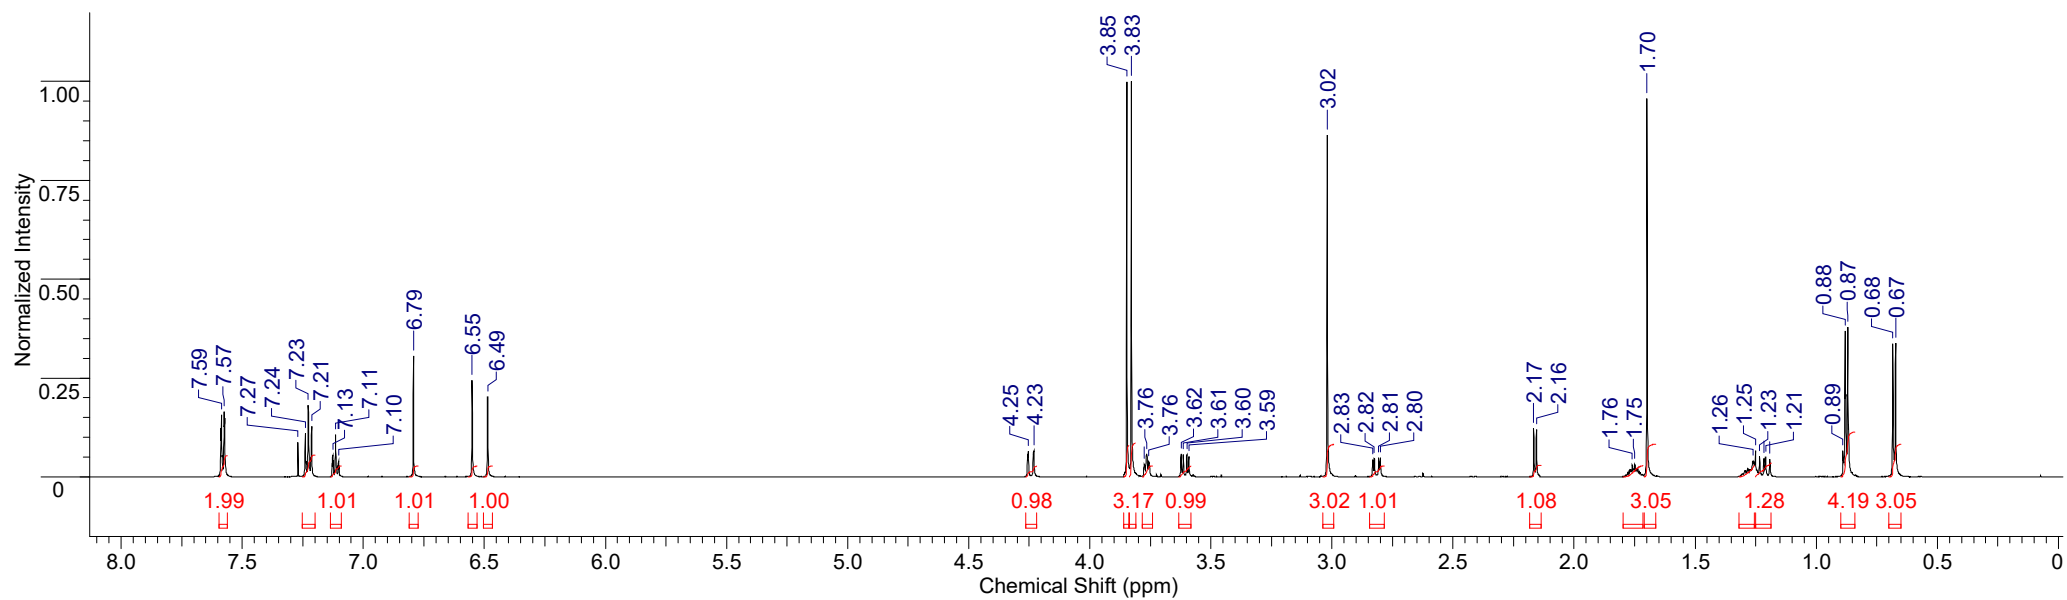

<sup>1</sup>H NMR spectra for 2f.

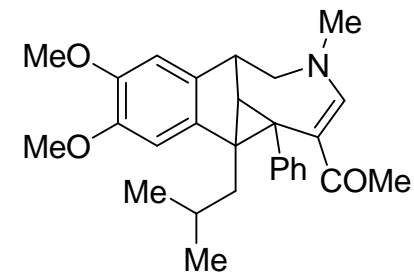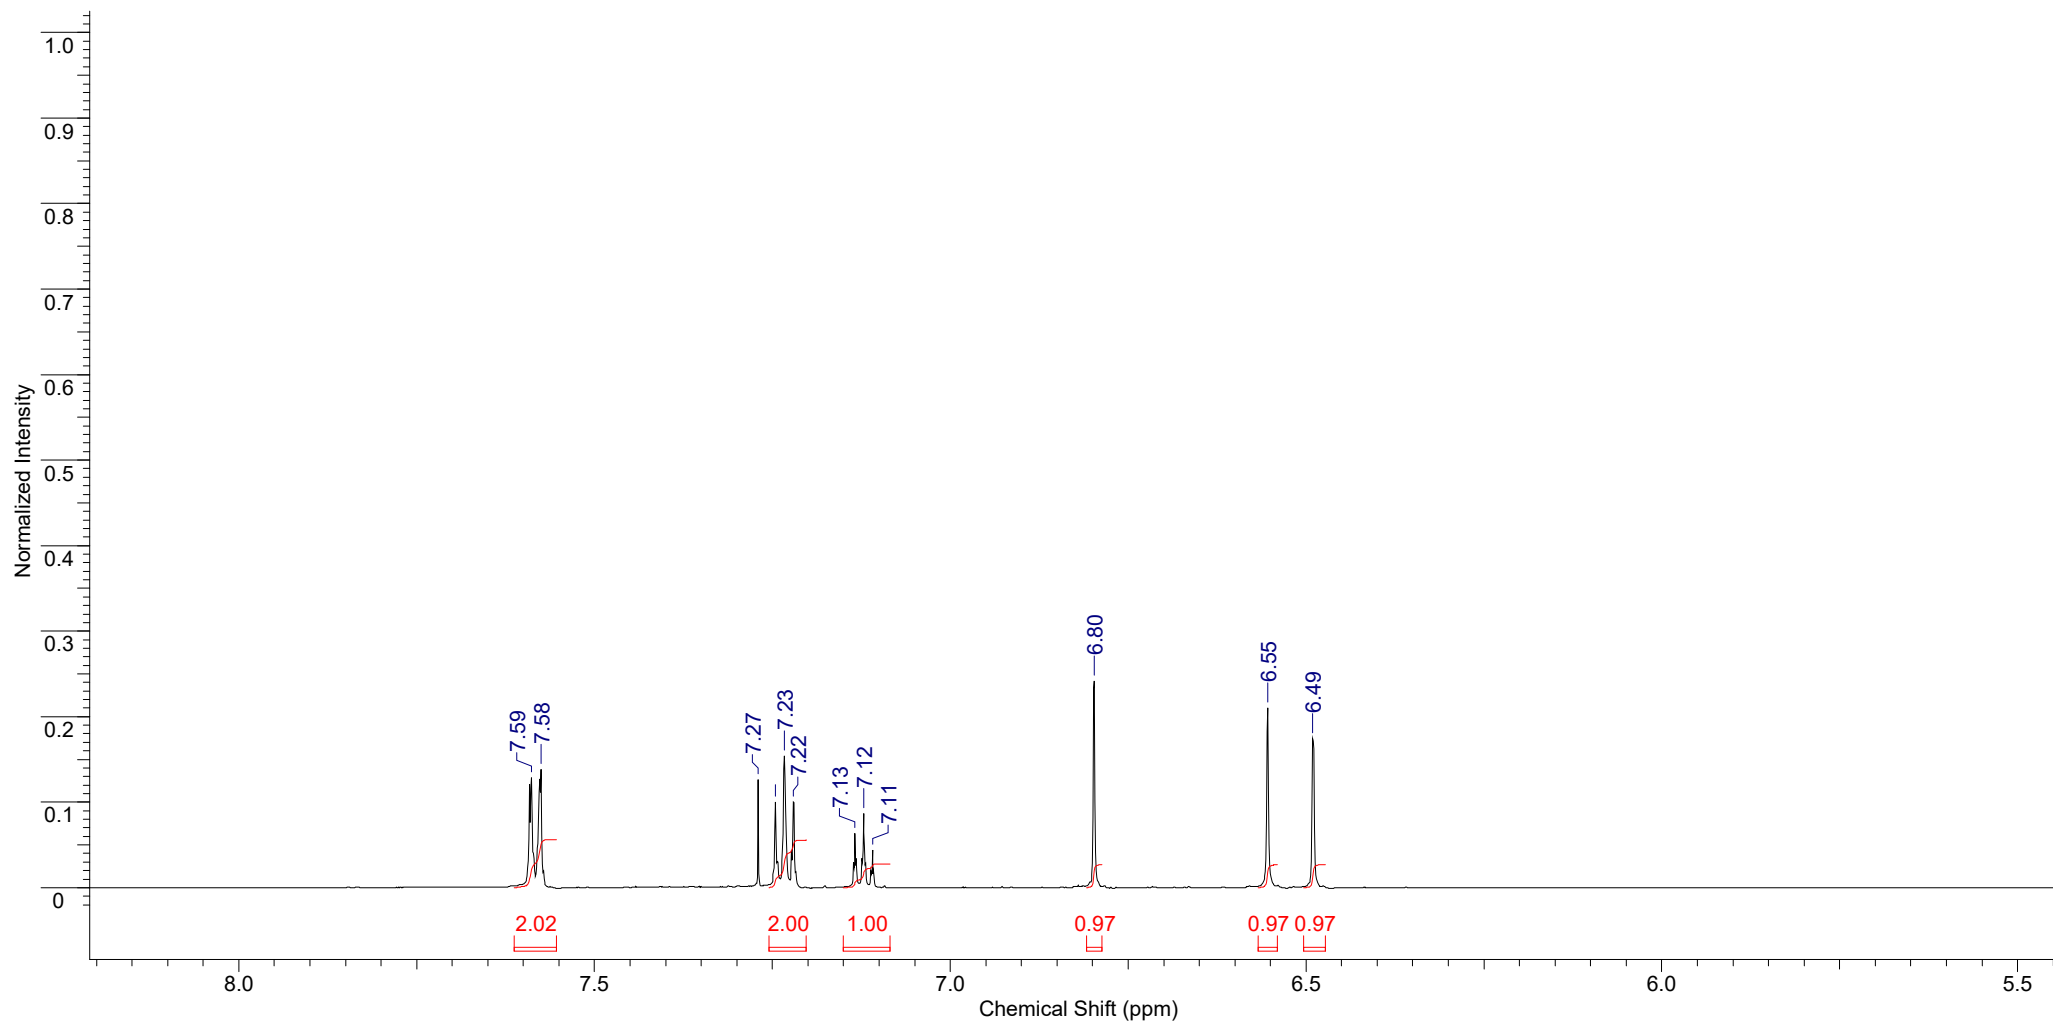

<sup>1</sup>H NMR spectra for 2f.

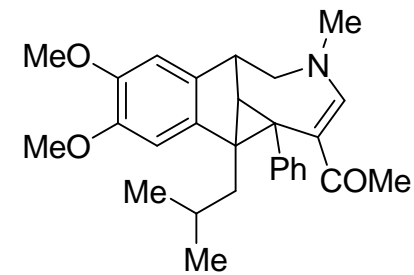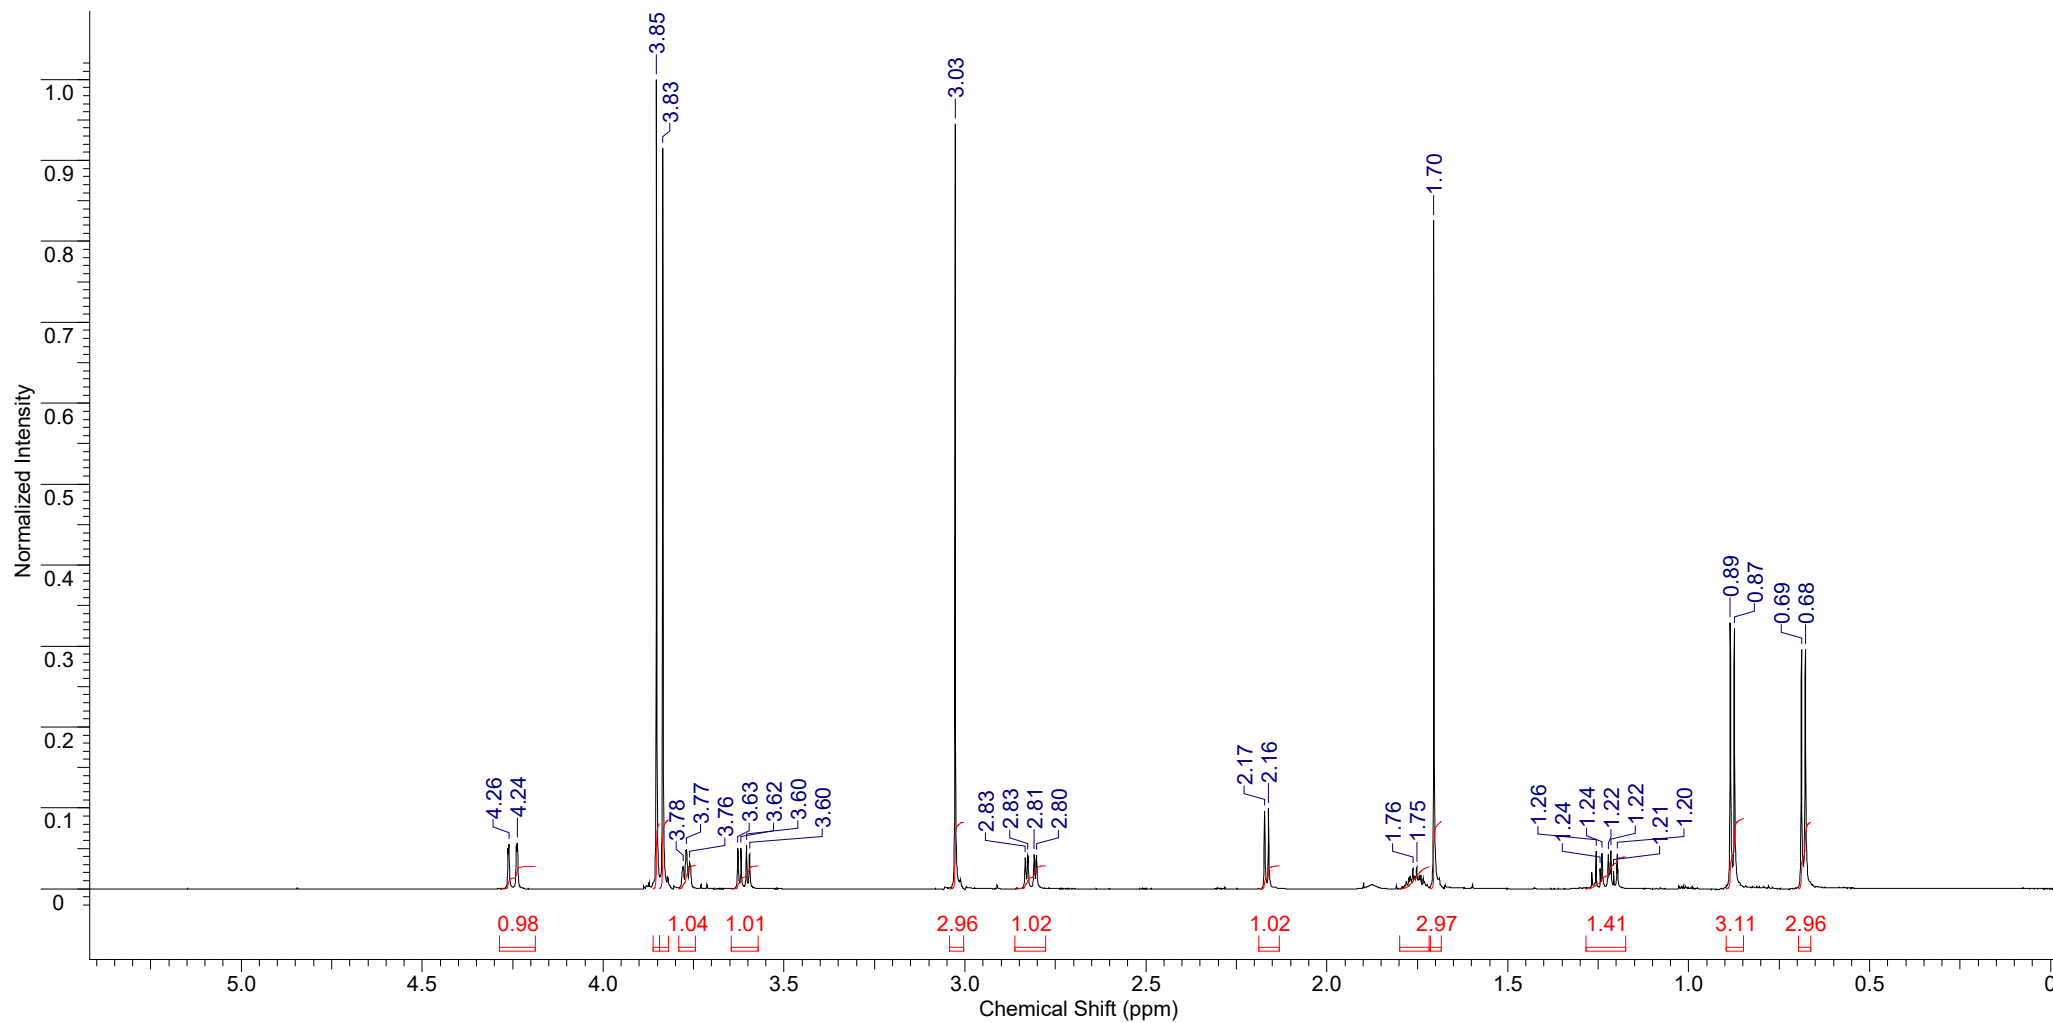



<sup>13</sup>C NMR spectra for 2f.

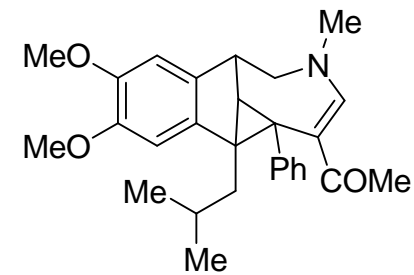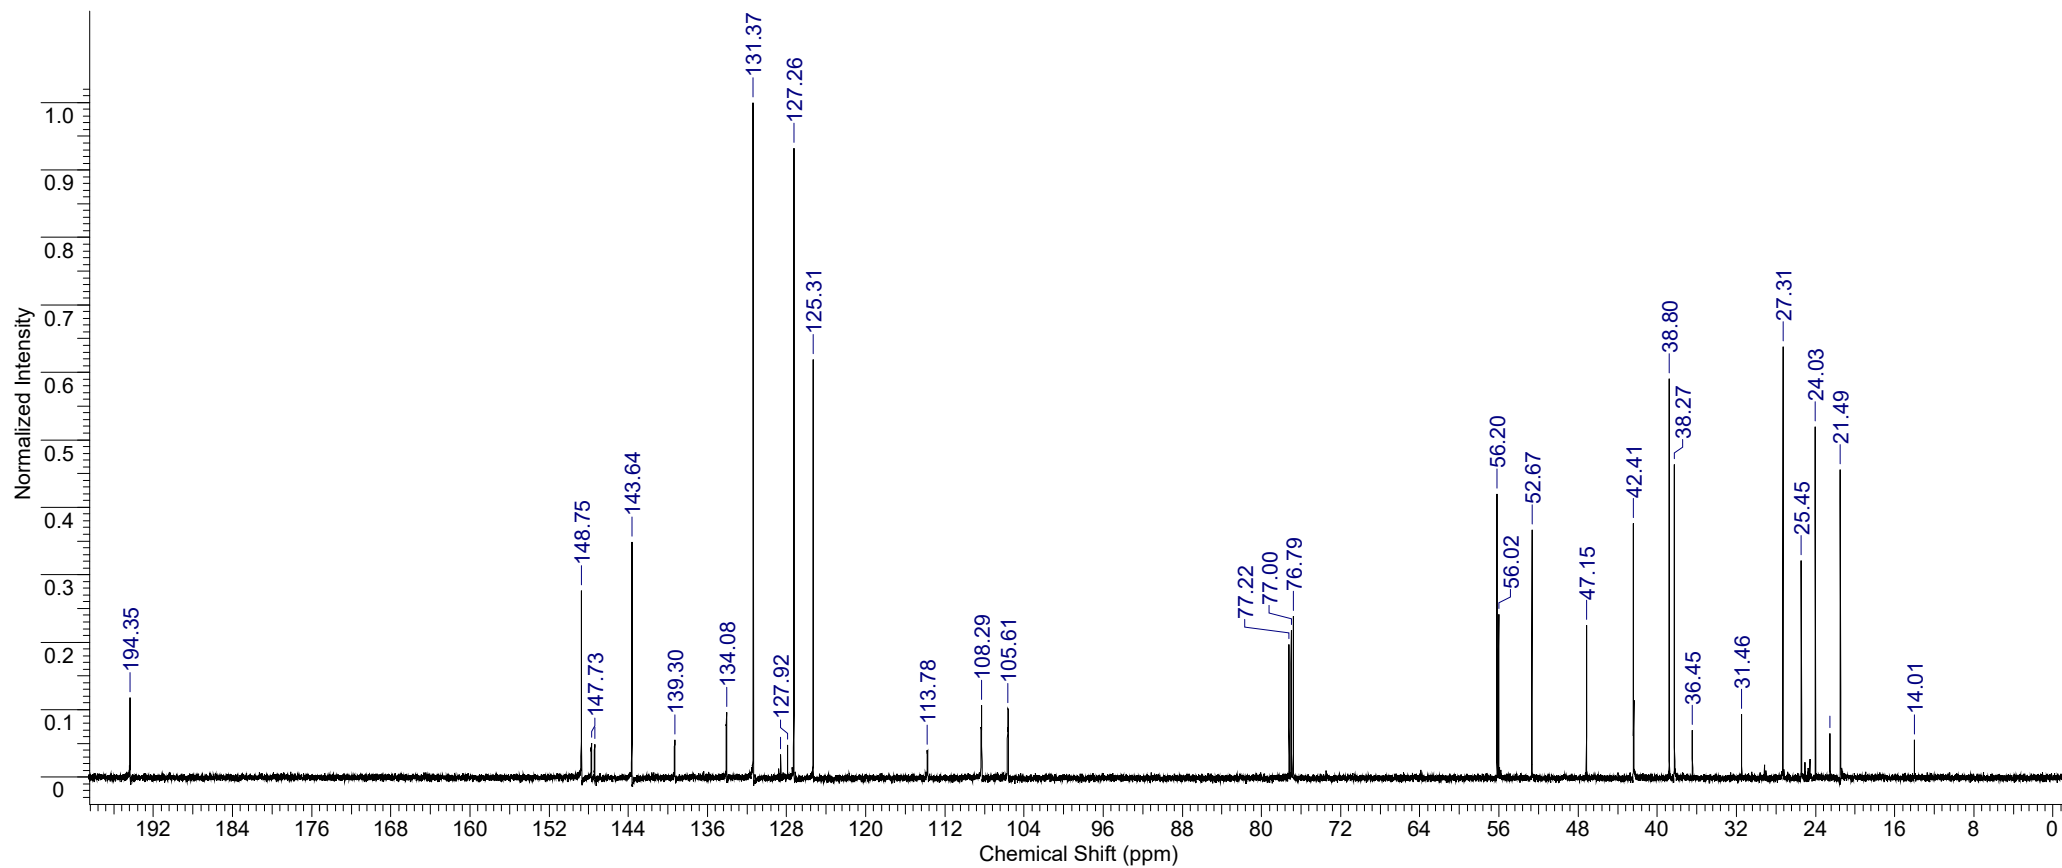

<sup>13</sup>C NMR spectra for 2f.

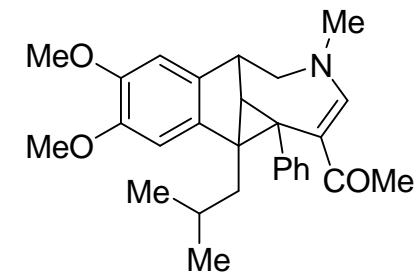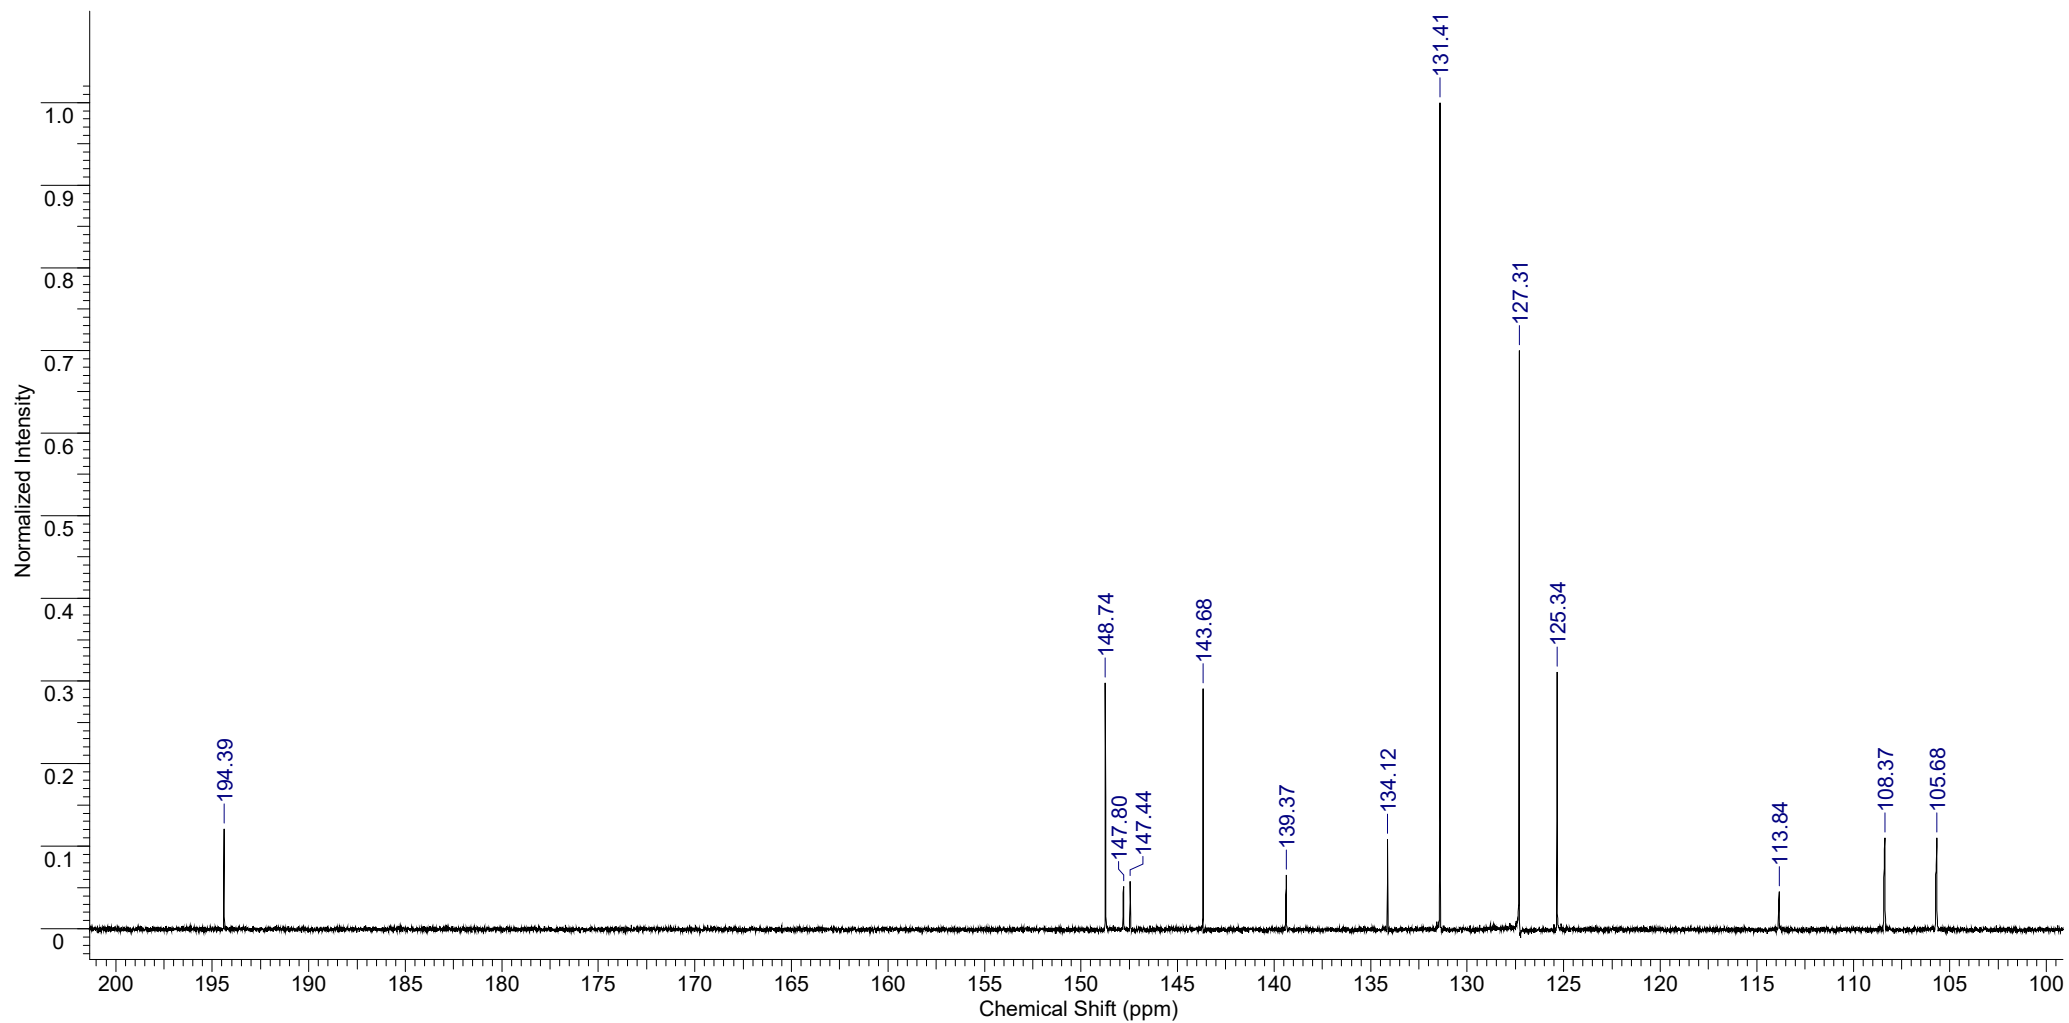

<sup>13</sup>C NMR spectra for 2f.

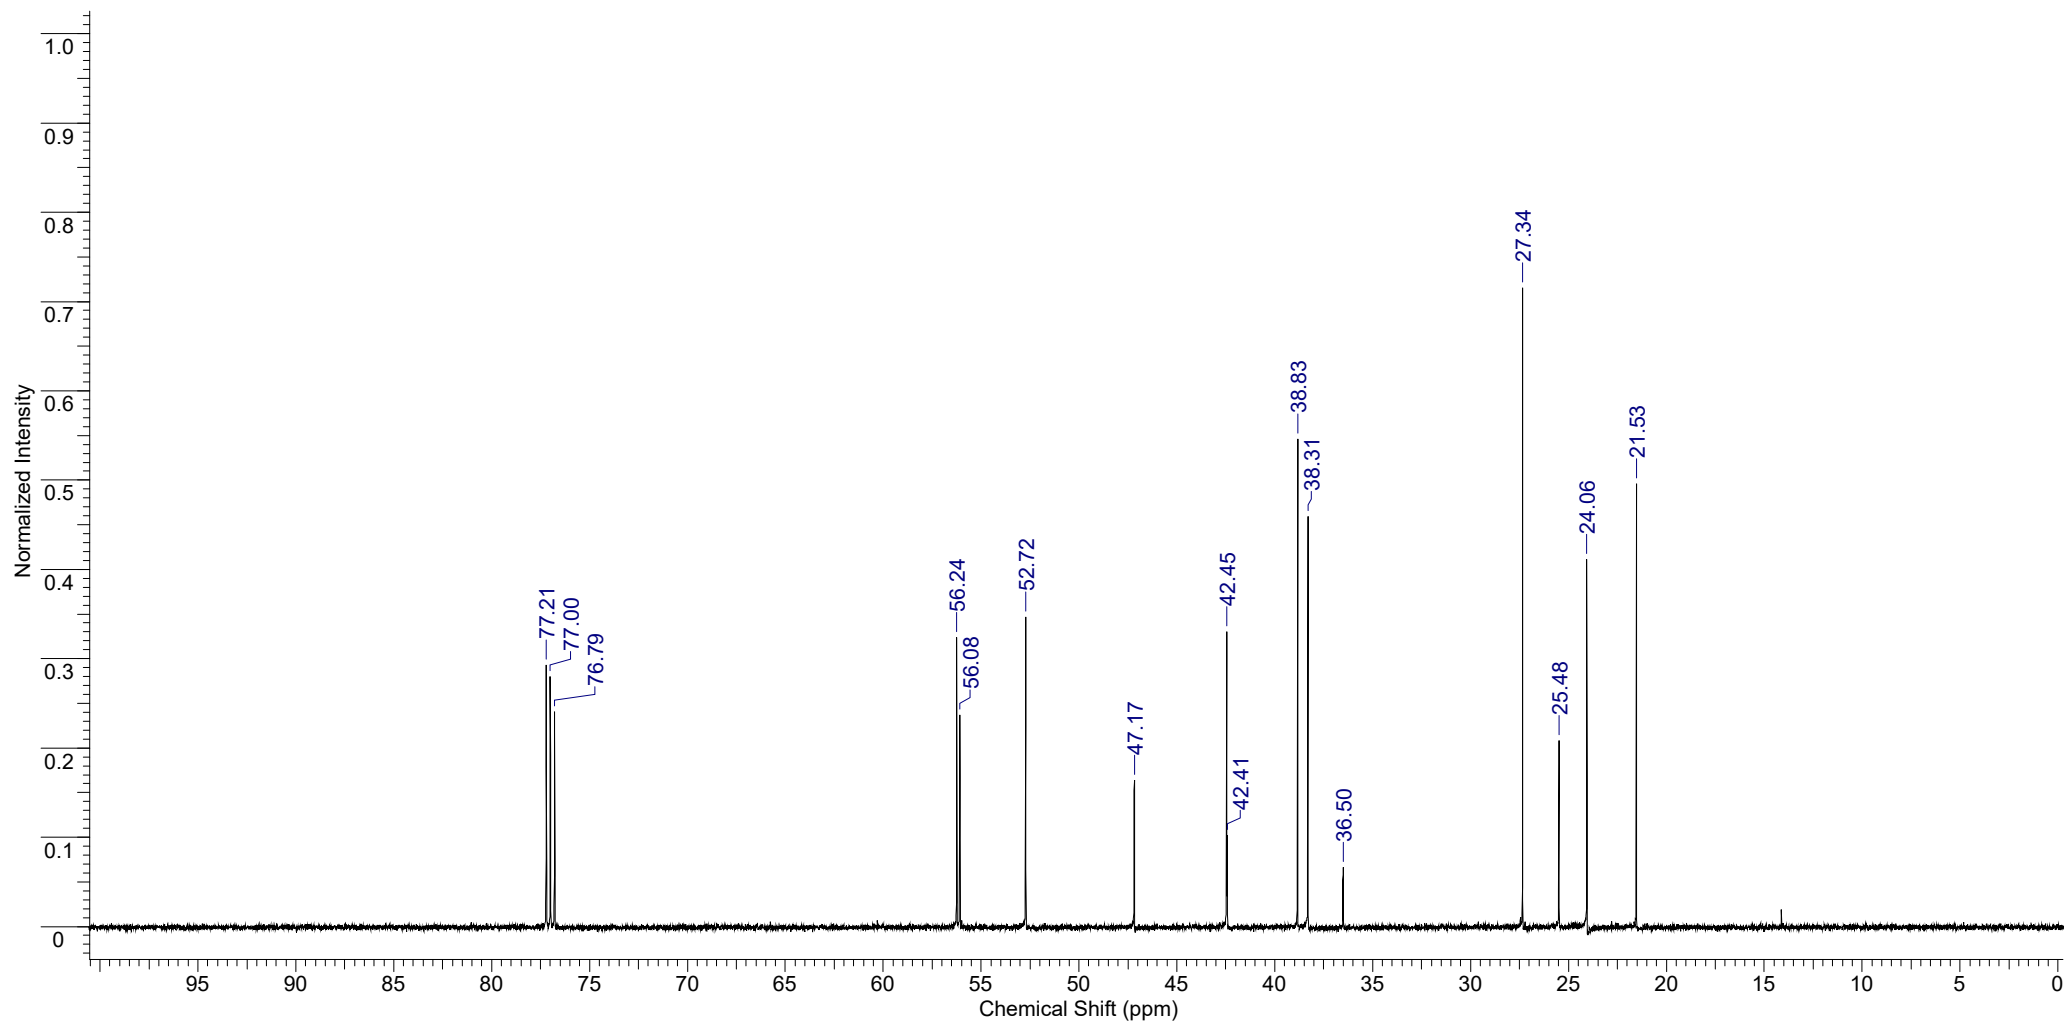

1-(4b-benzyl-6,7-dimethoxy-2-methyl-4a-phenyl-1,2,4a,4b,8b,8c-hexahydro-2-azabenzocyclopropa[cd]azulen-4-yl)ethanone (2h)

<sup>1</sup>H NMR spectra for 2h.

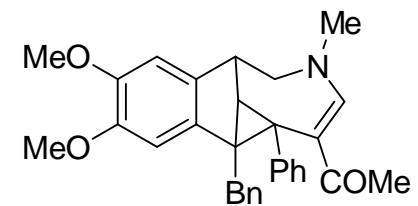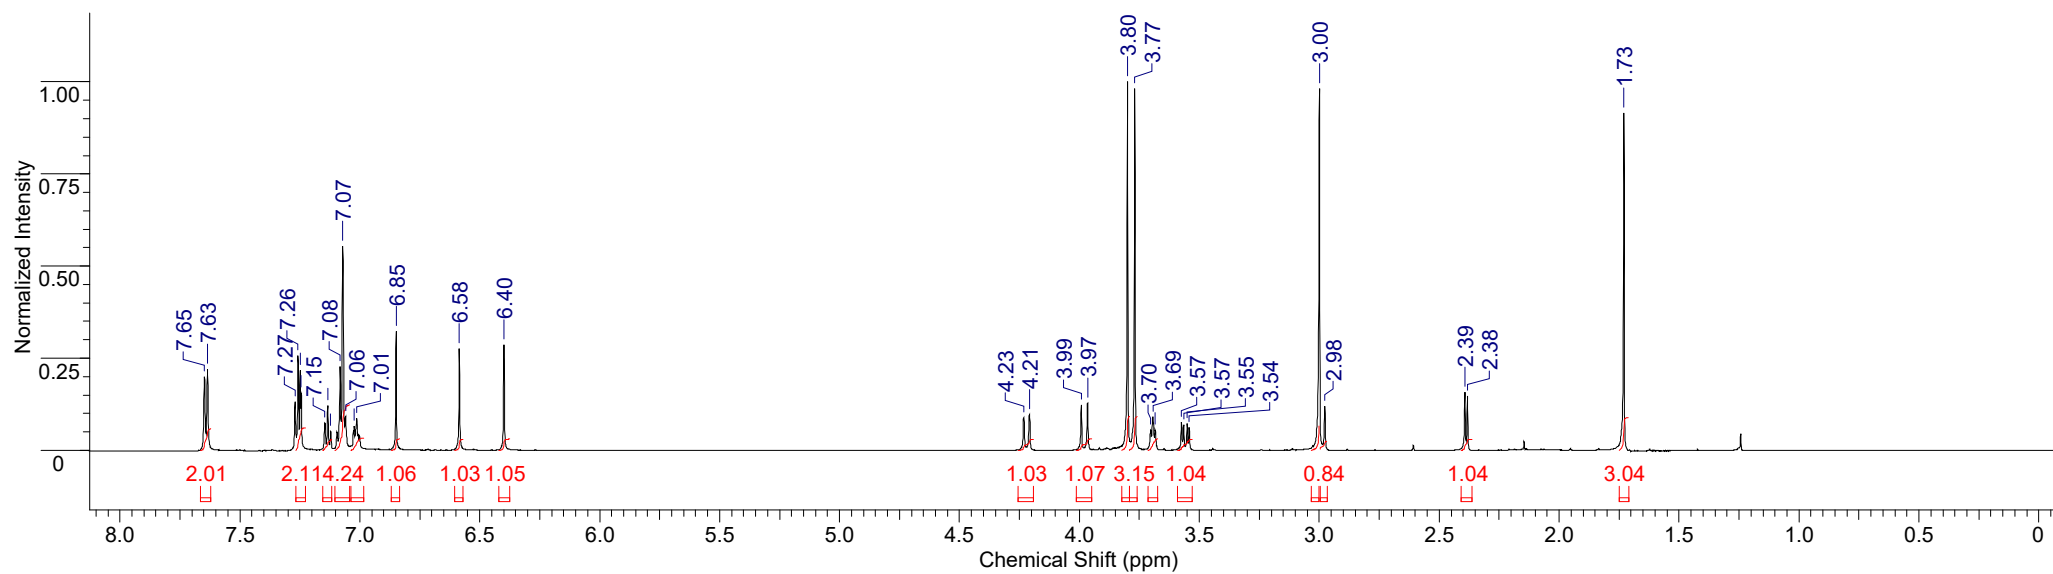

<sup>1</sup>H NMR spectra for 2h.

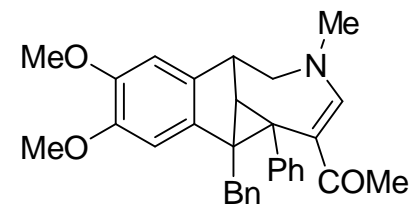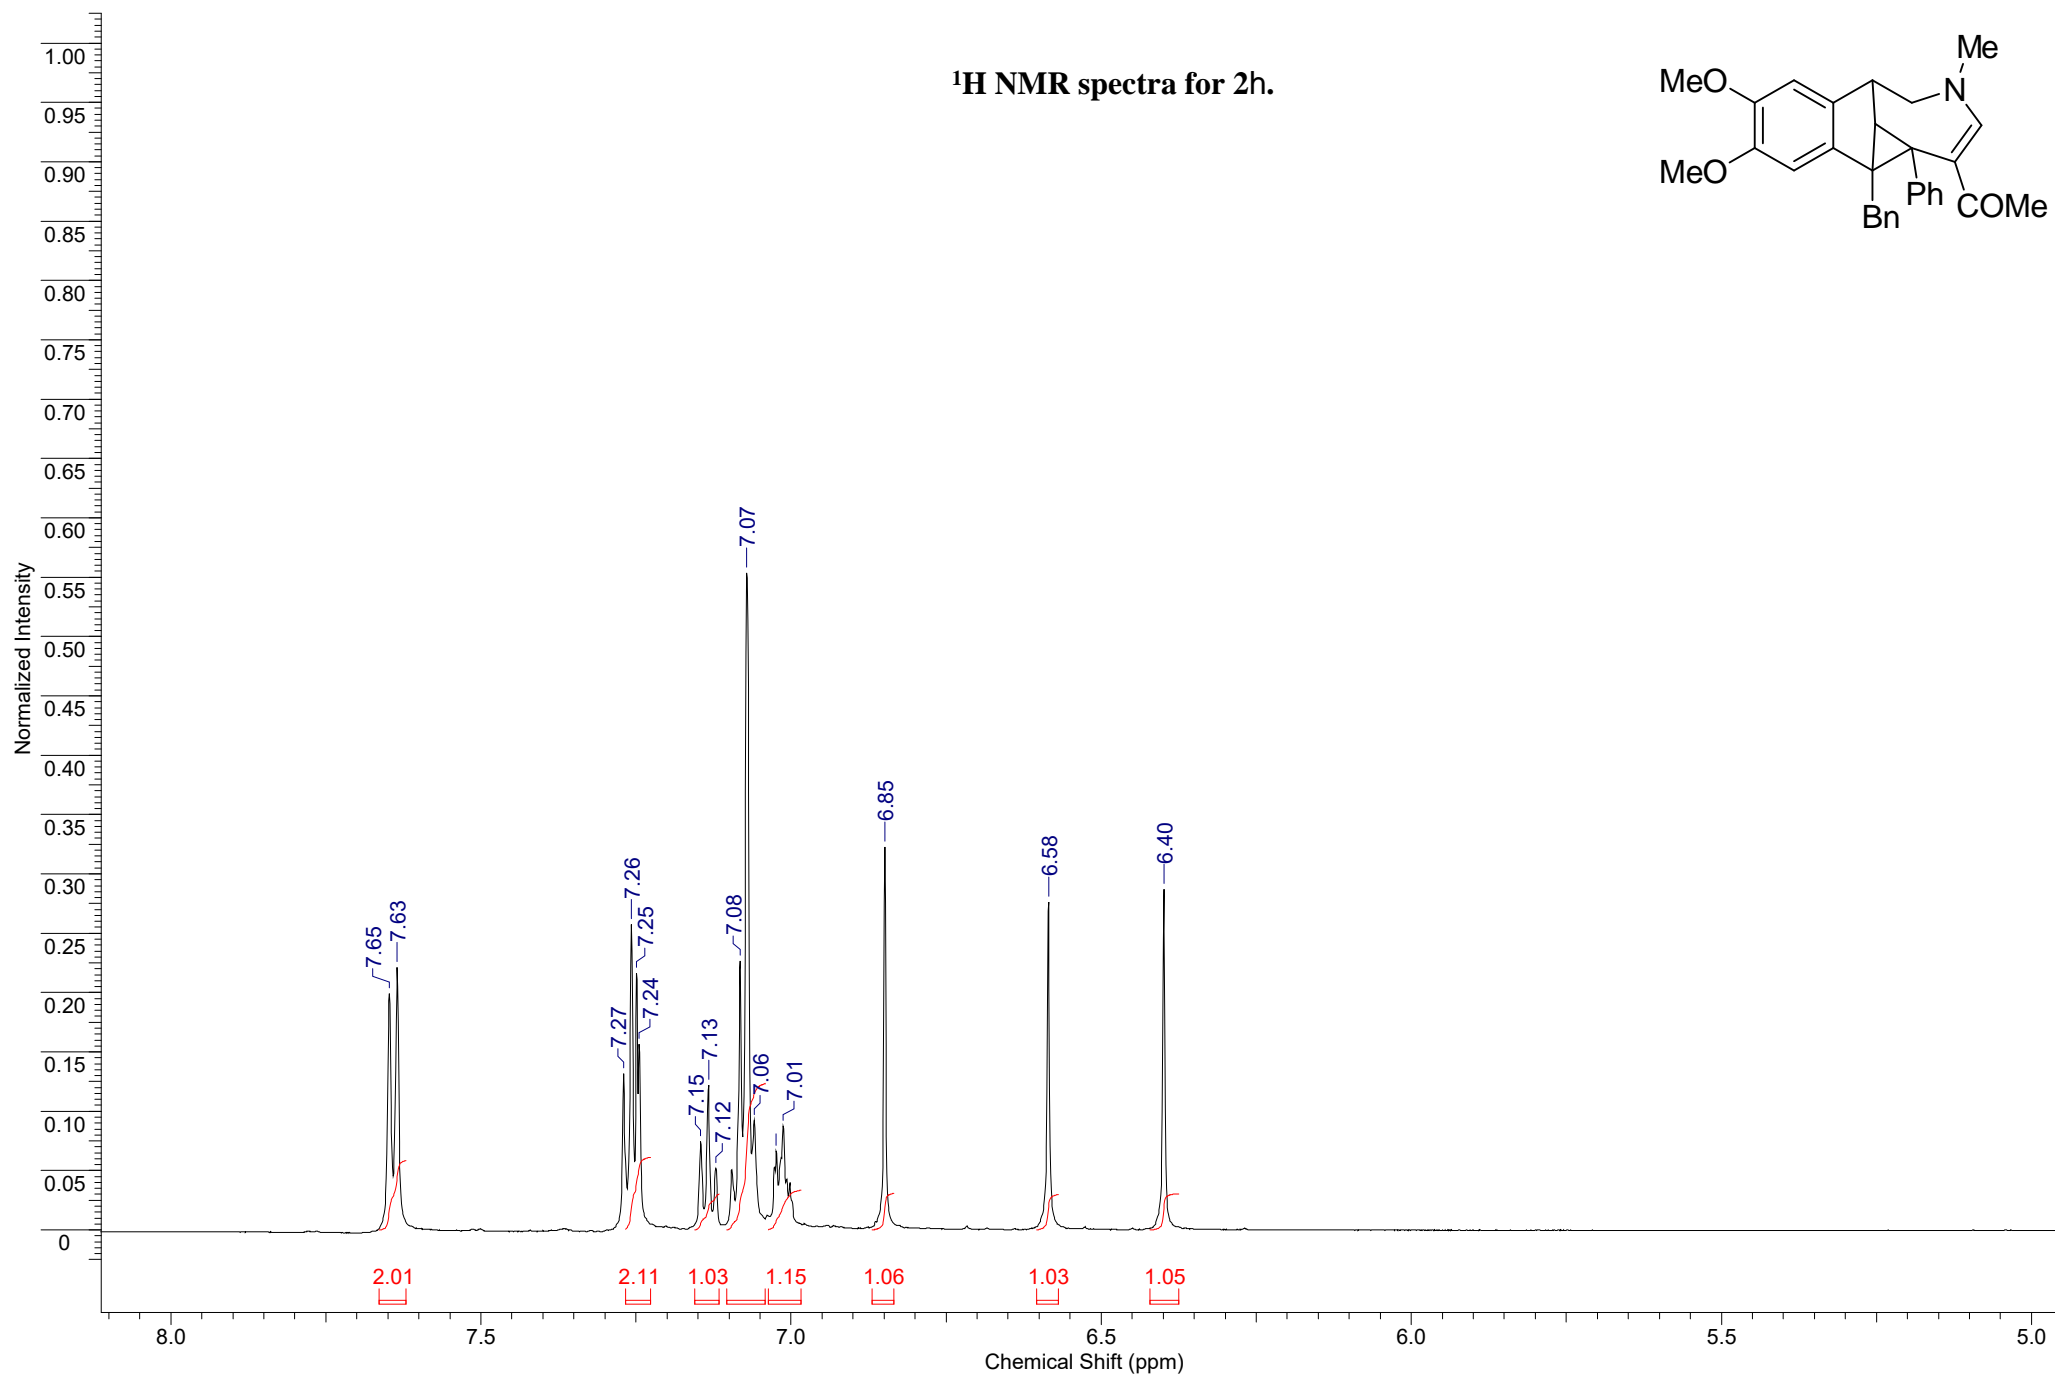

<sup>1</sup>H NMR spectra for 2h.

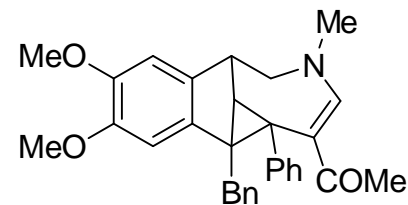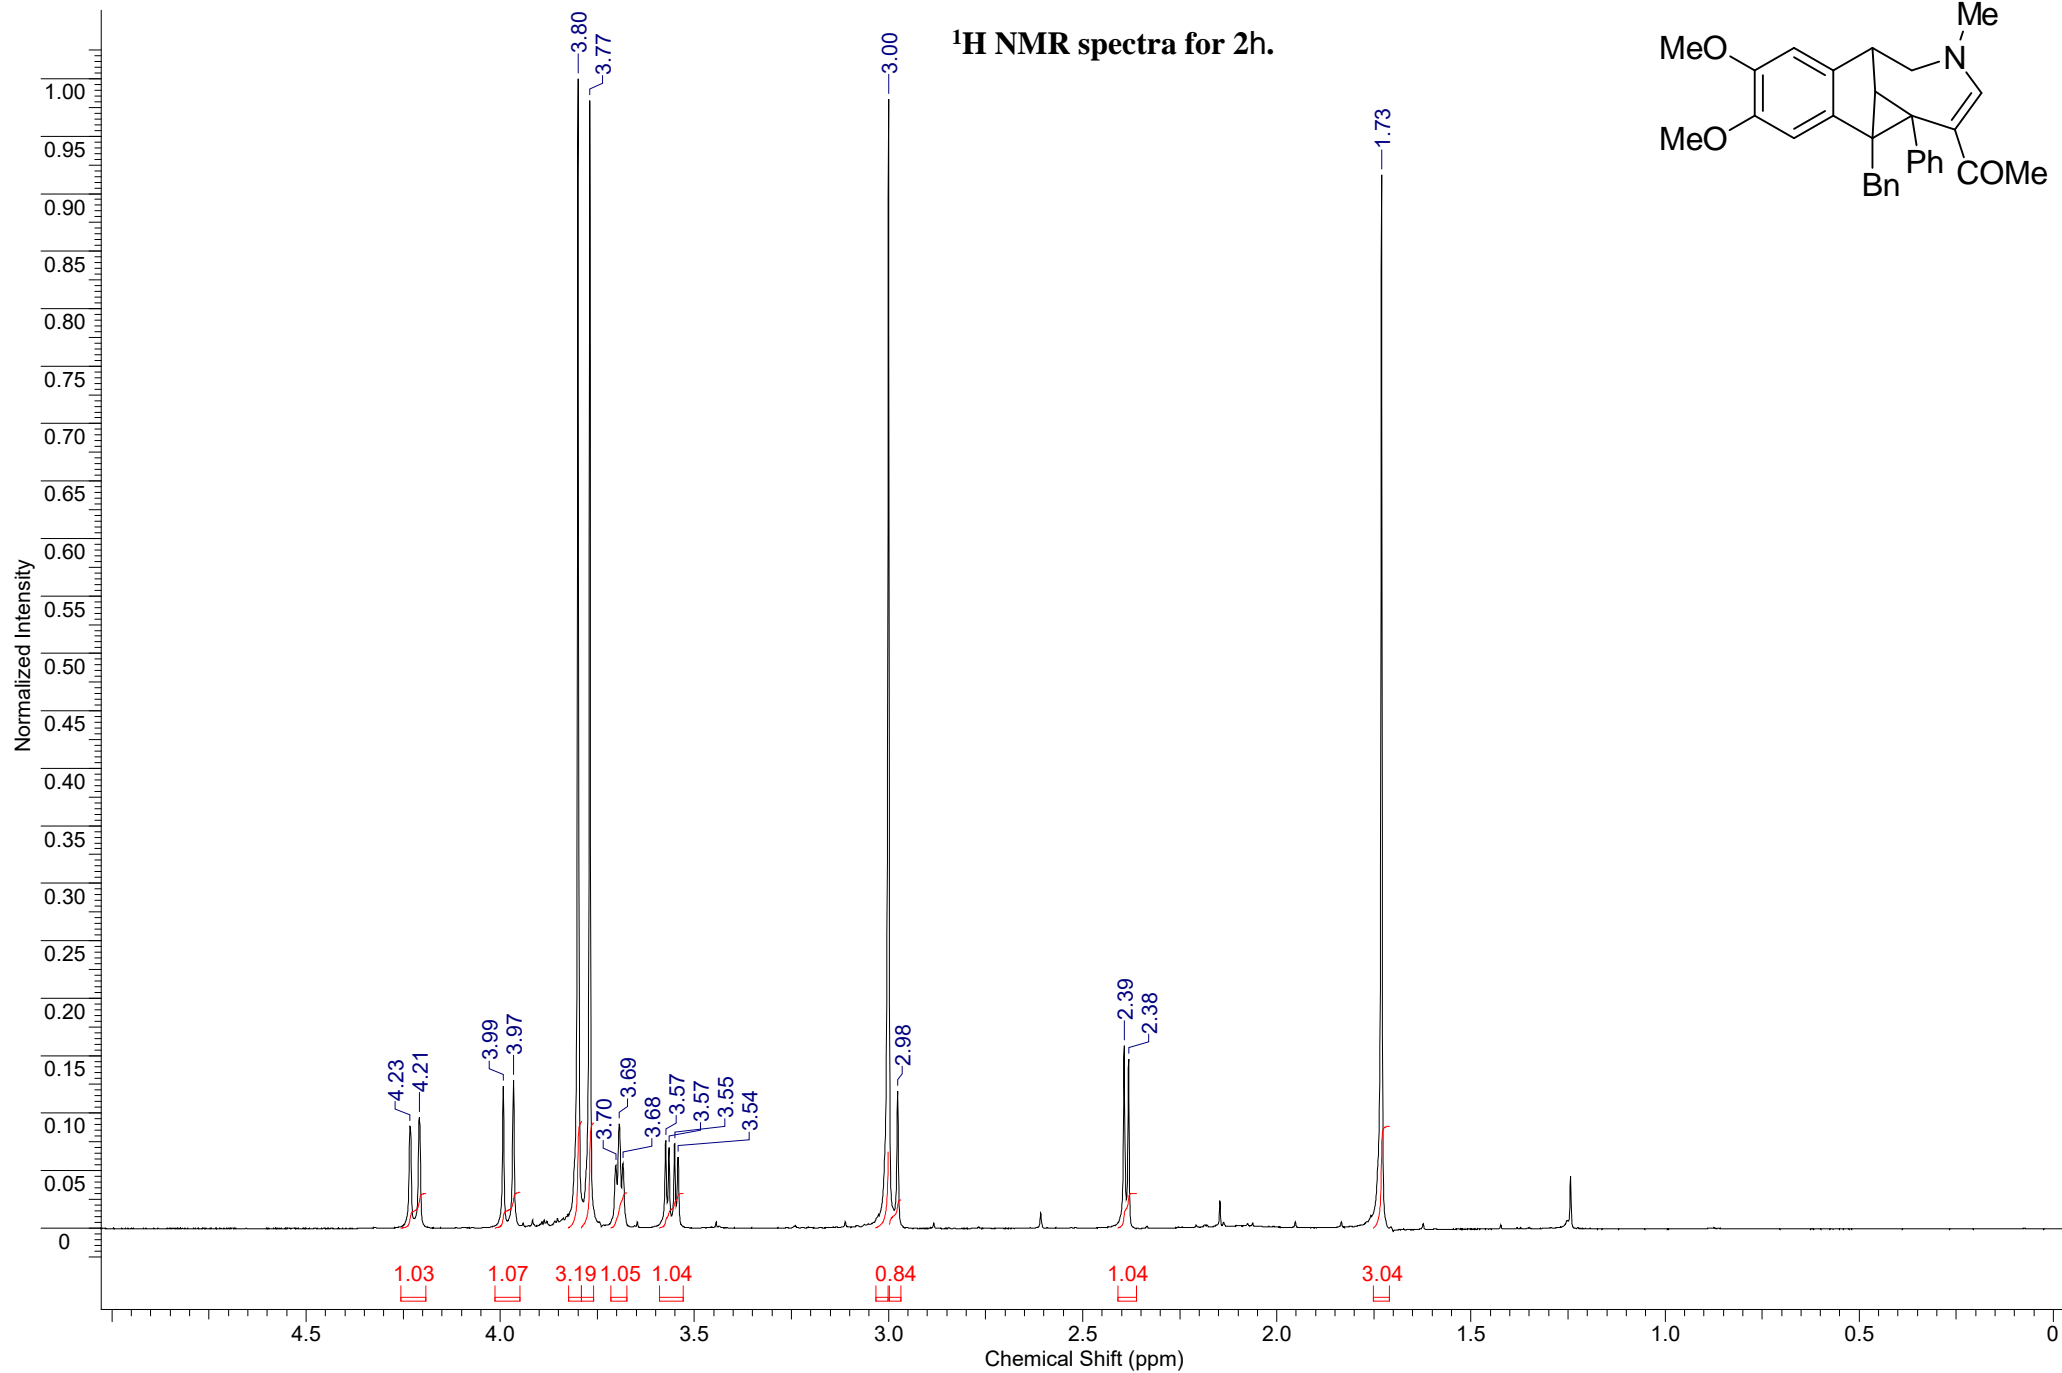

<sup>13</sup>C NMR spectra for 2h.

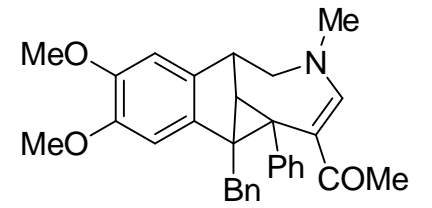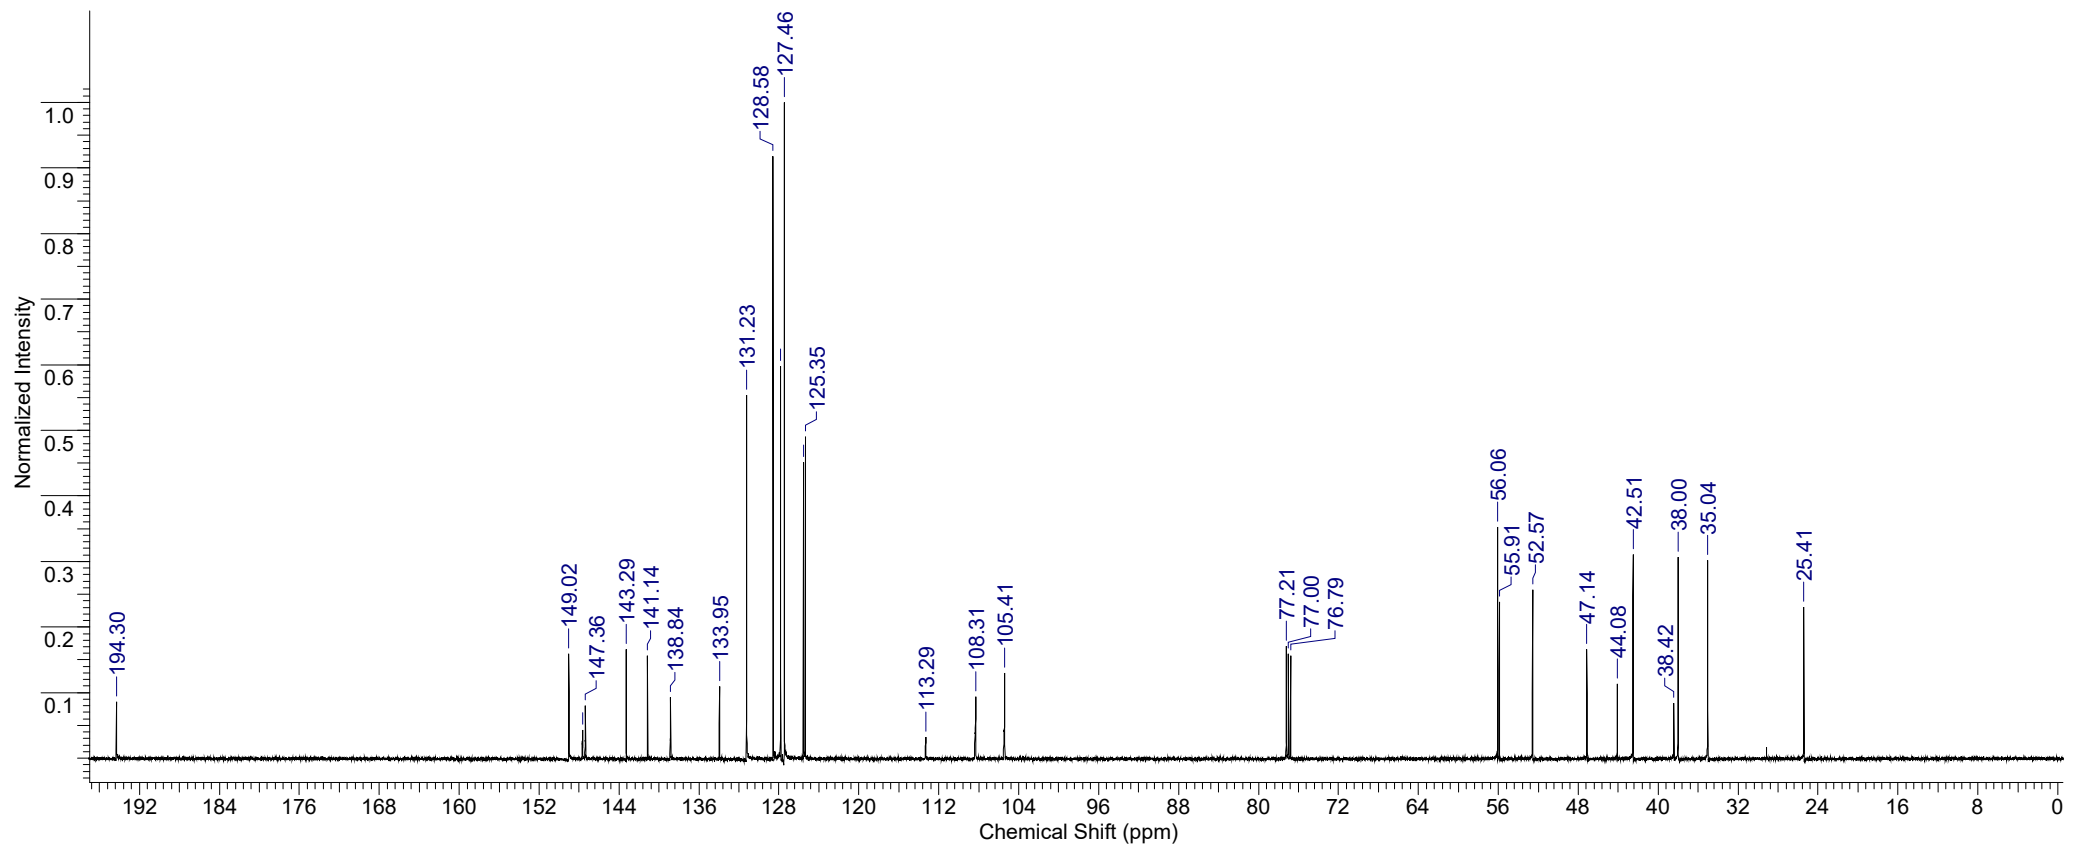

<sup>13</sup>C NMR spectra for 2h.

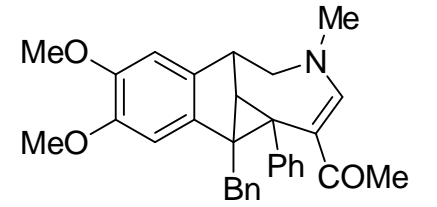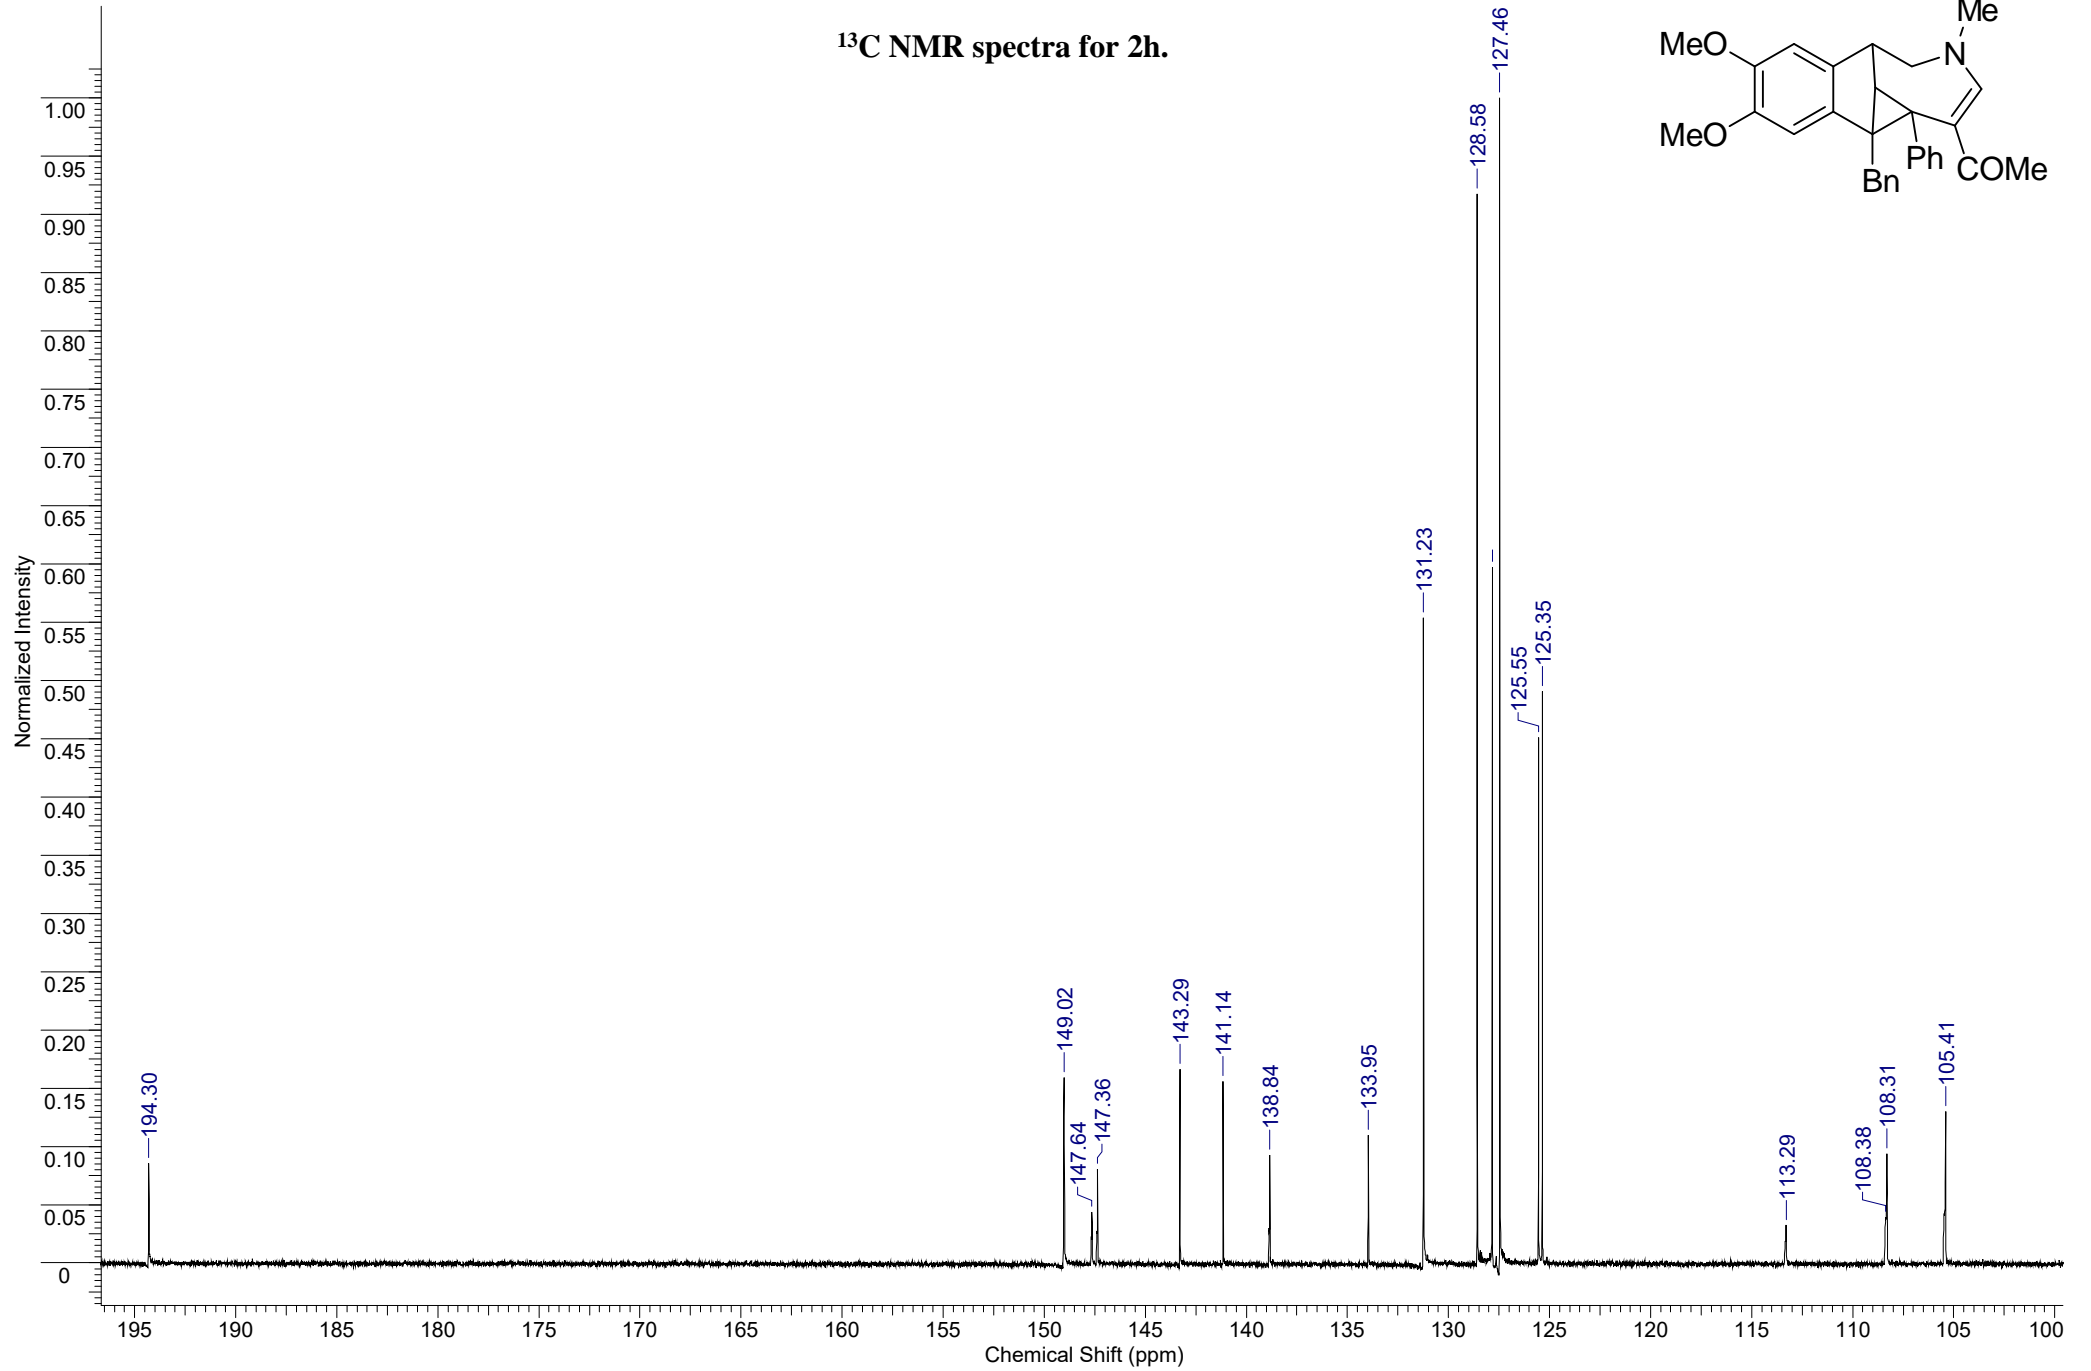



<sup>13</sup>C NMR spectra for 2h.

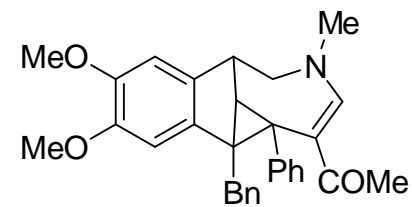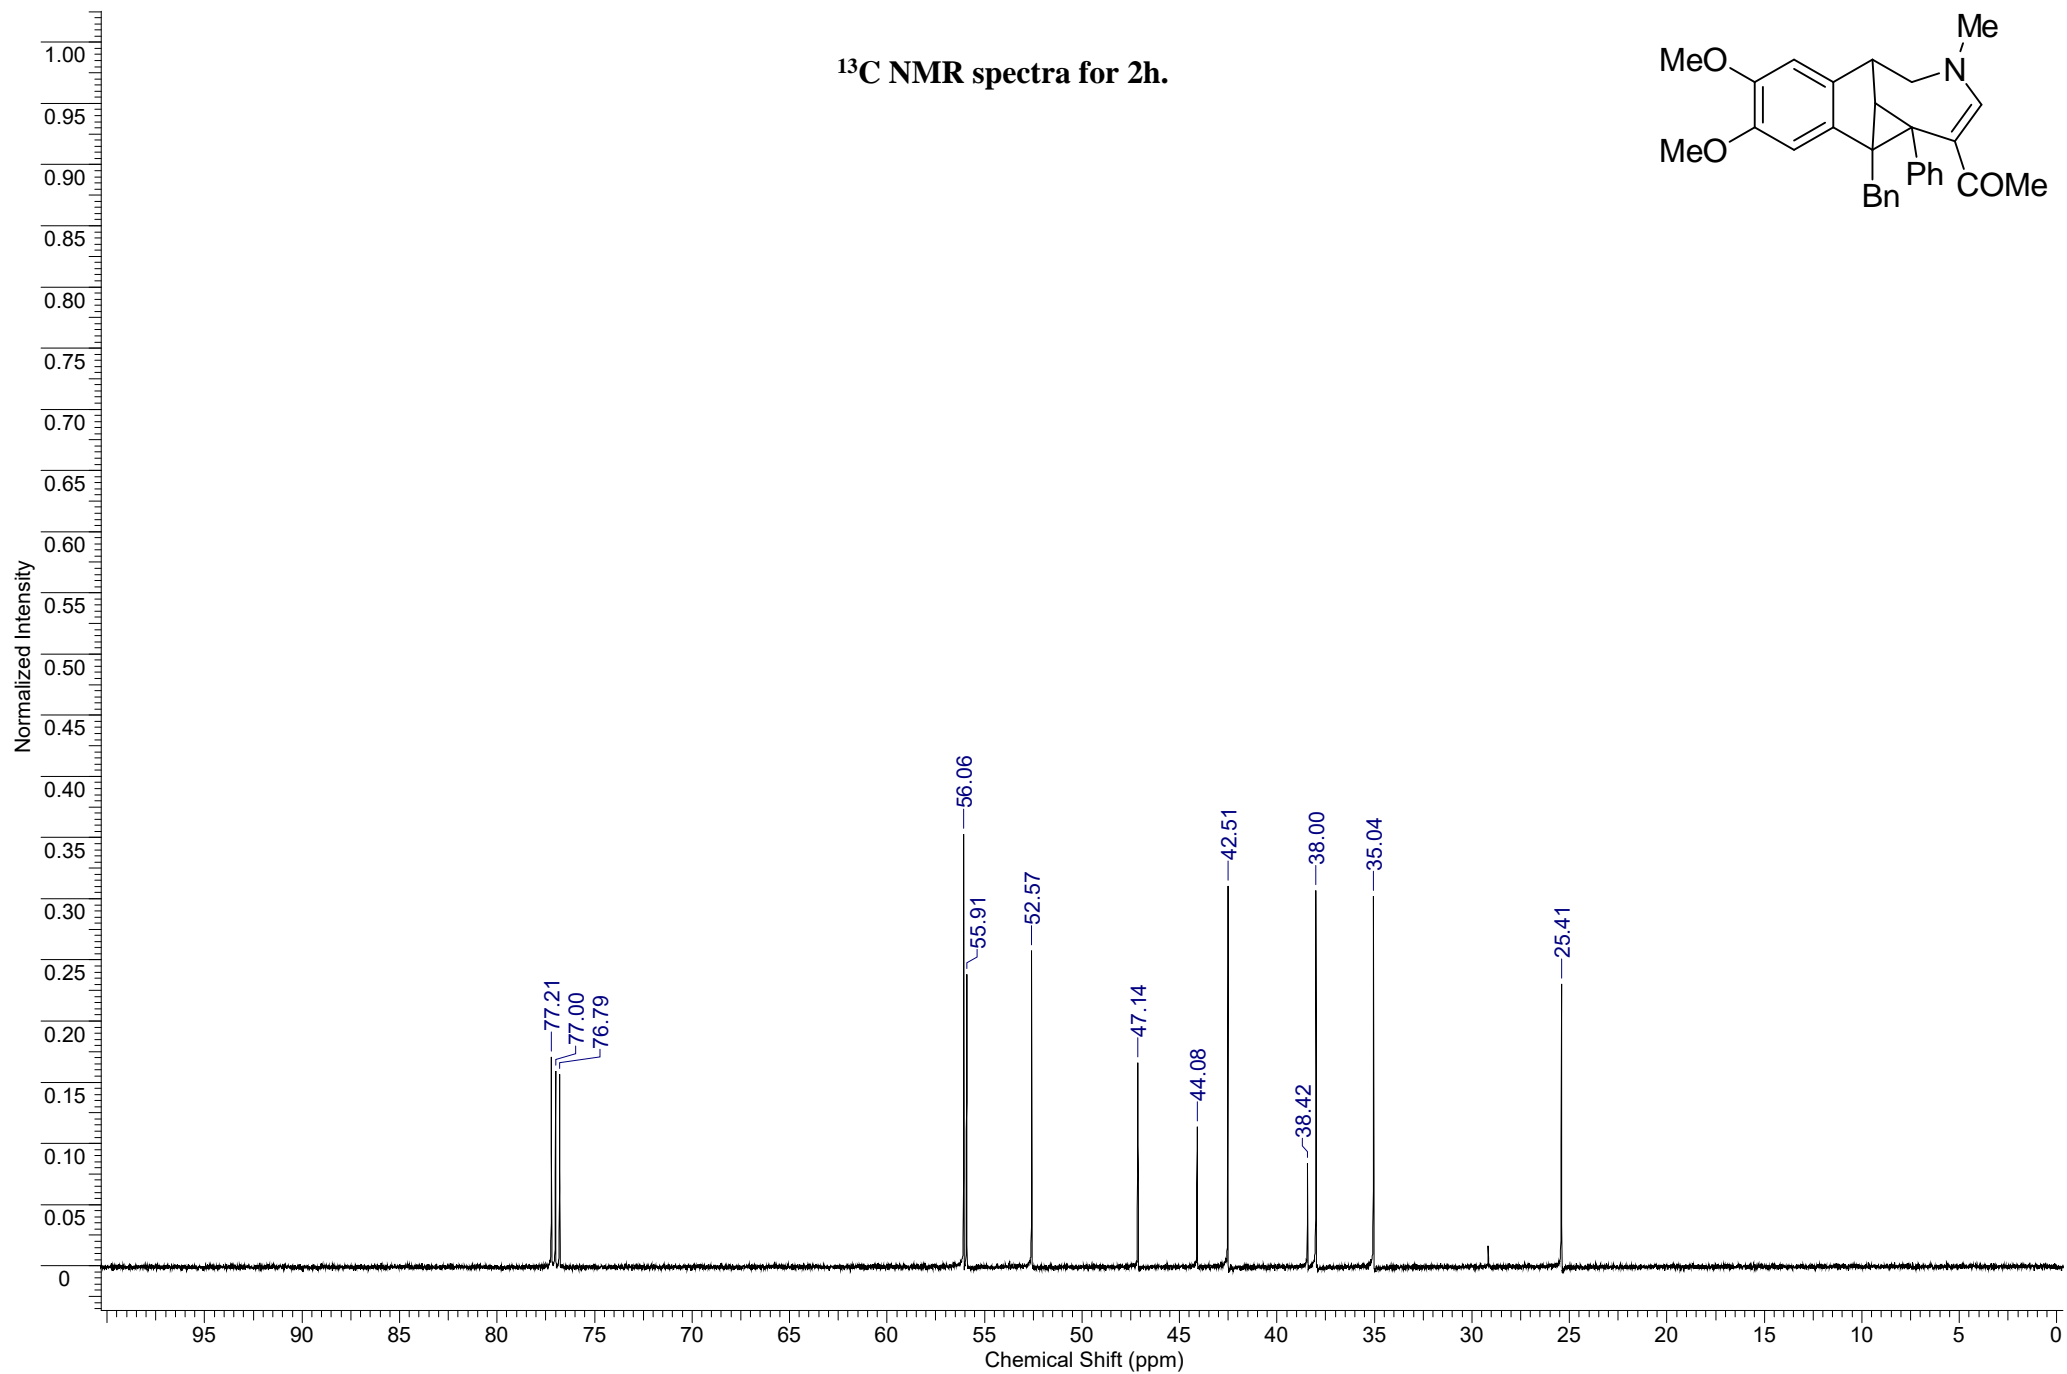

Methyl 2-methyl-4a,4b-diphenyl-1,2,4a,4b,8b,8c-hexahydro-2-azabenz[a]cyclopropa[cd]azulene-4-carboxylate (2i)

$^1\text{H}$  NMR spectra for 2i.

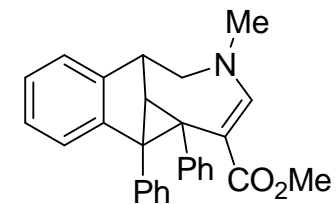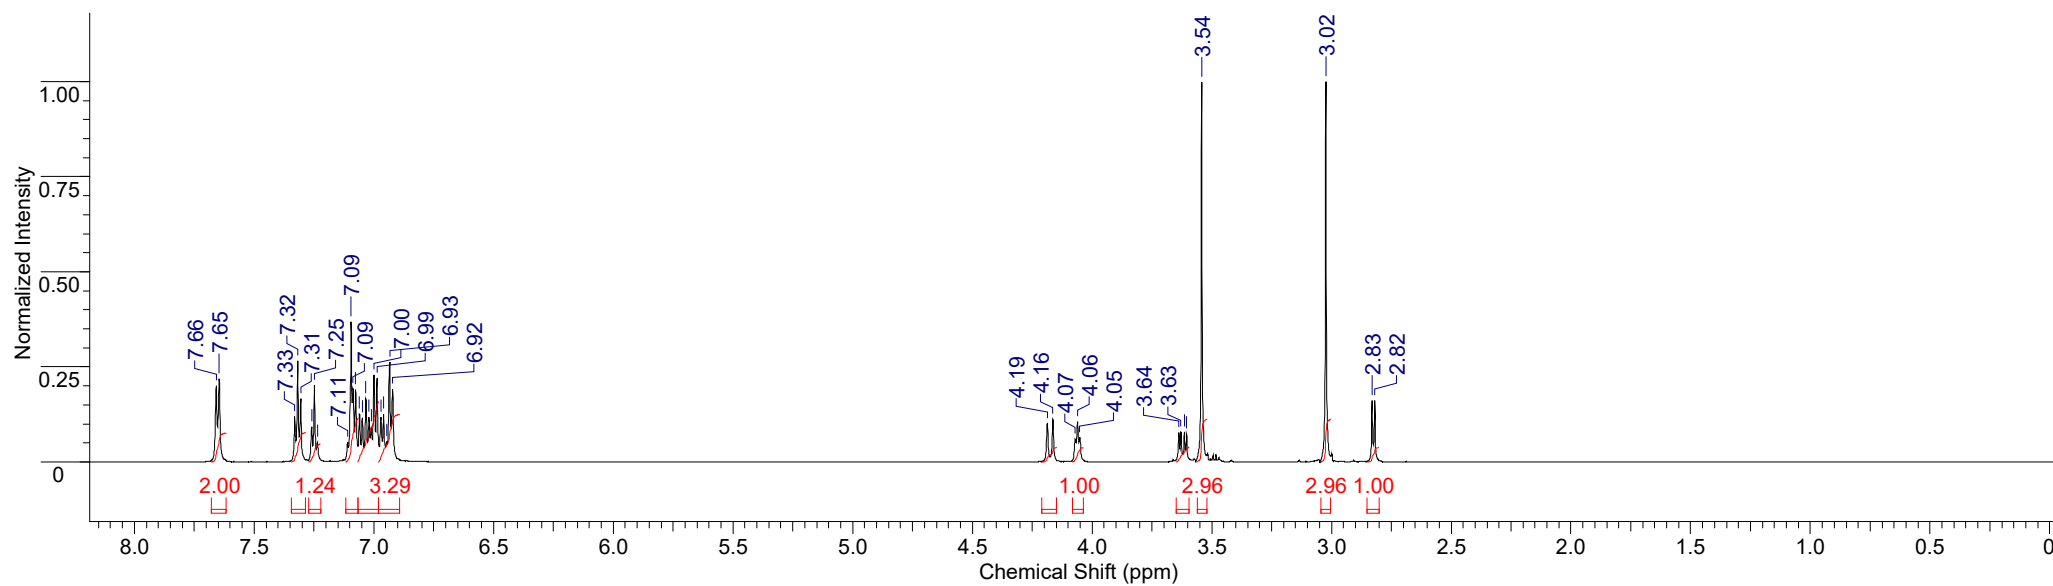

<sup>1</sup>H NMR spectra for 2i.

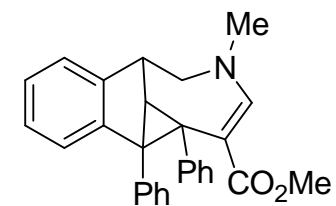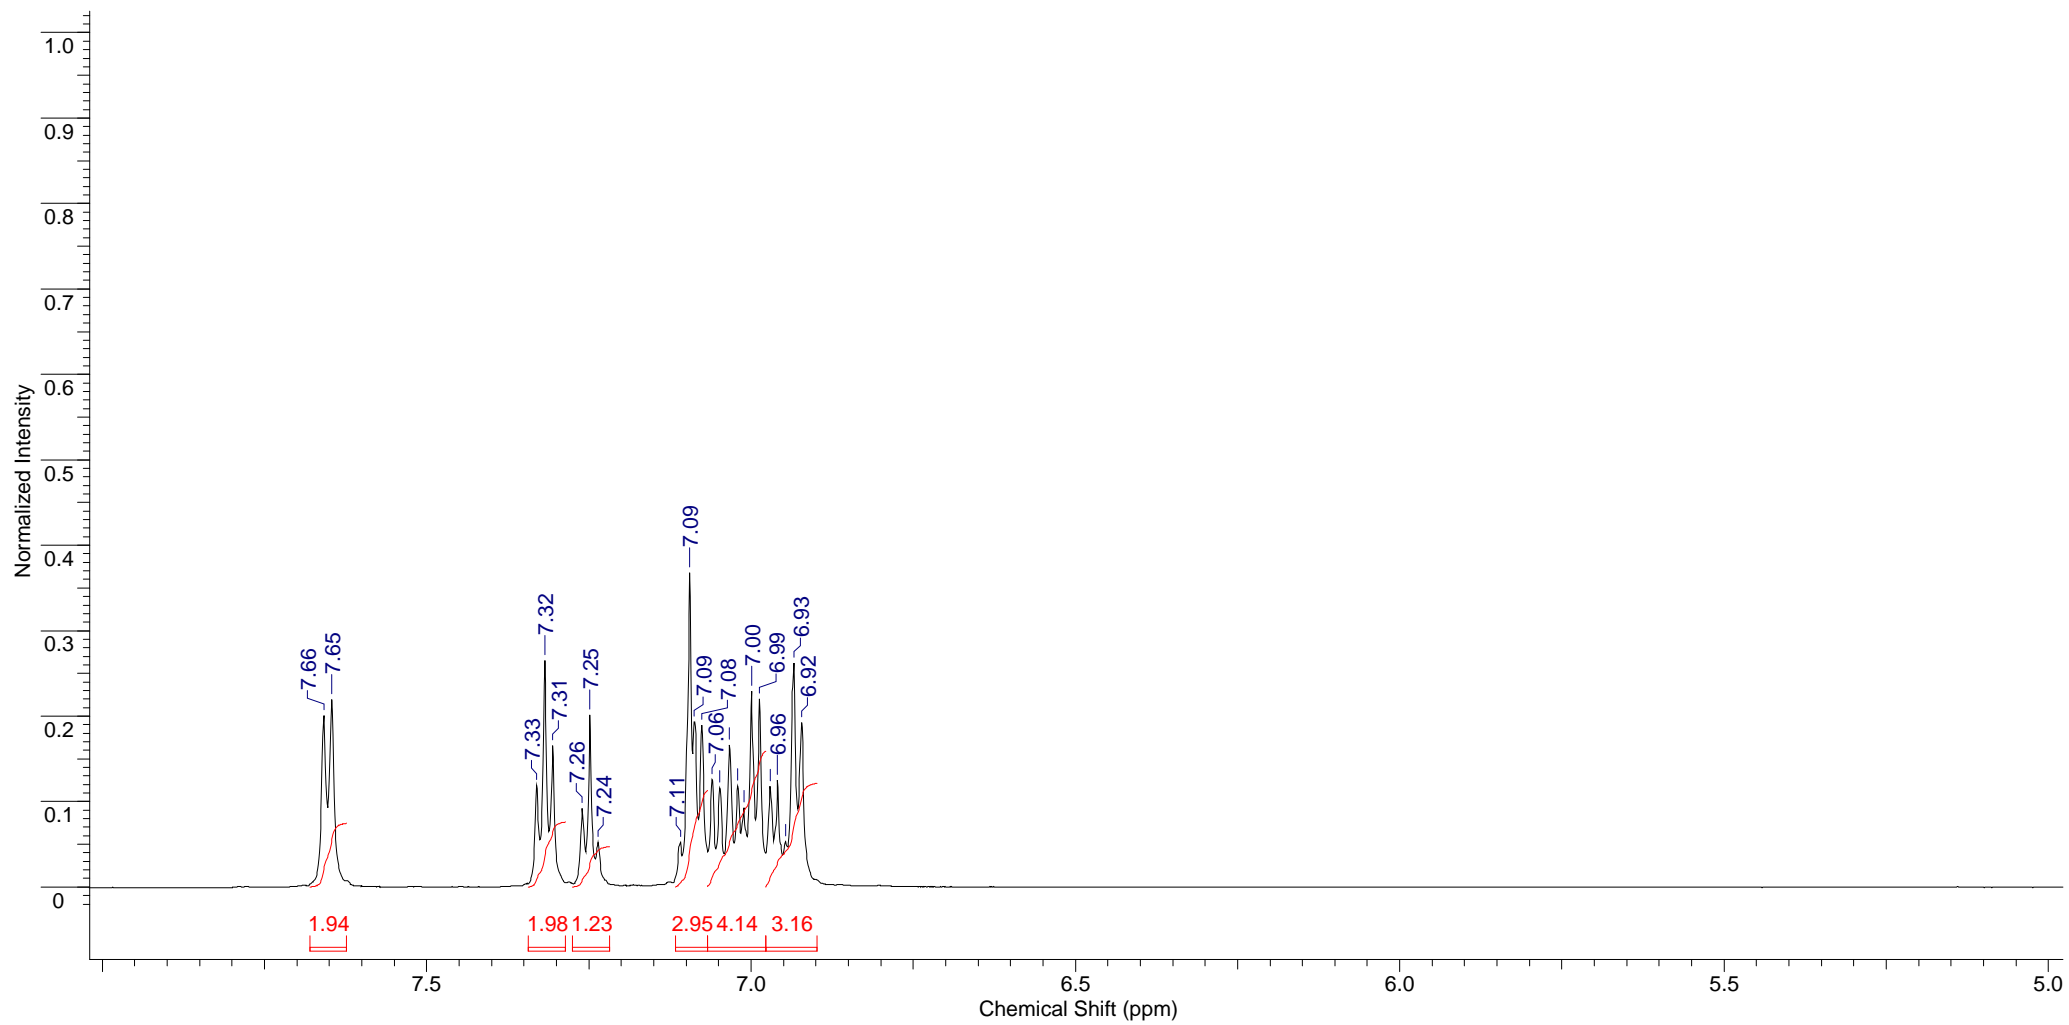

<sup>1</sup>H NMR spectra for 2i.

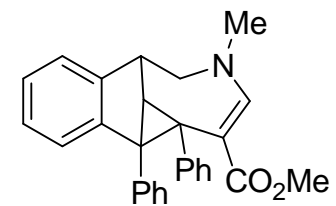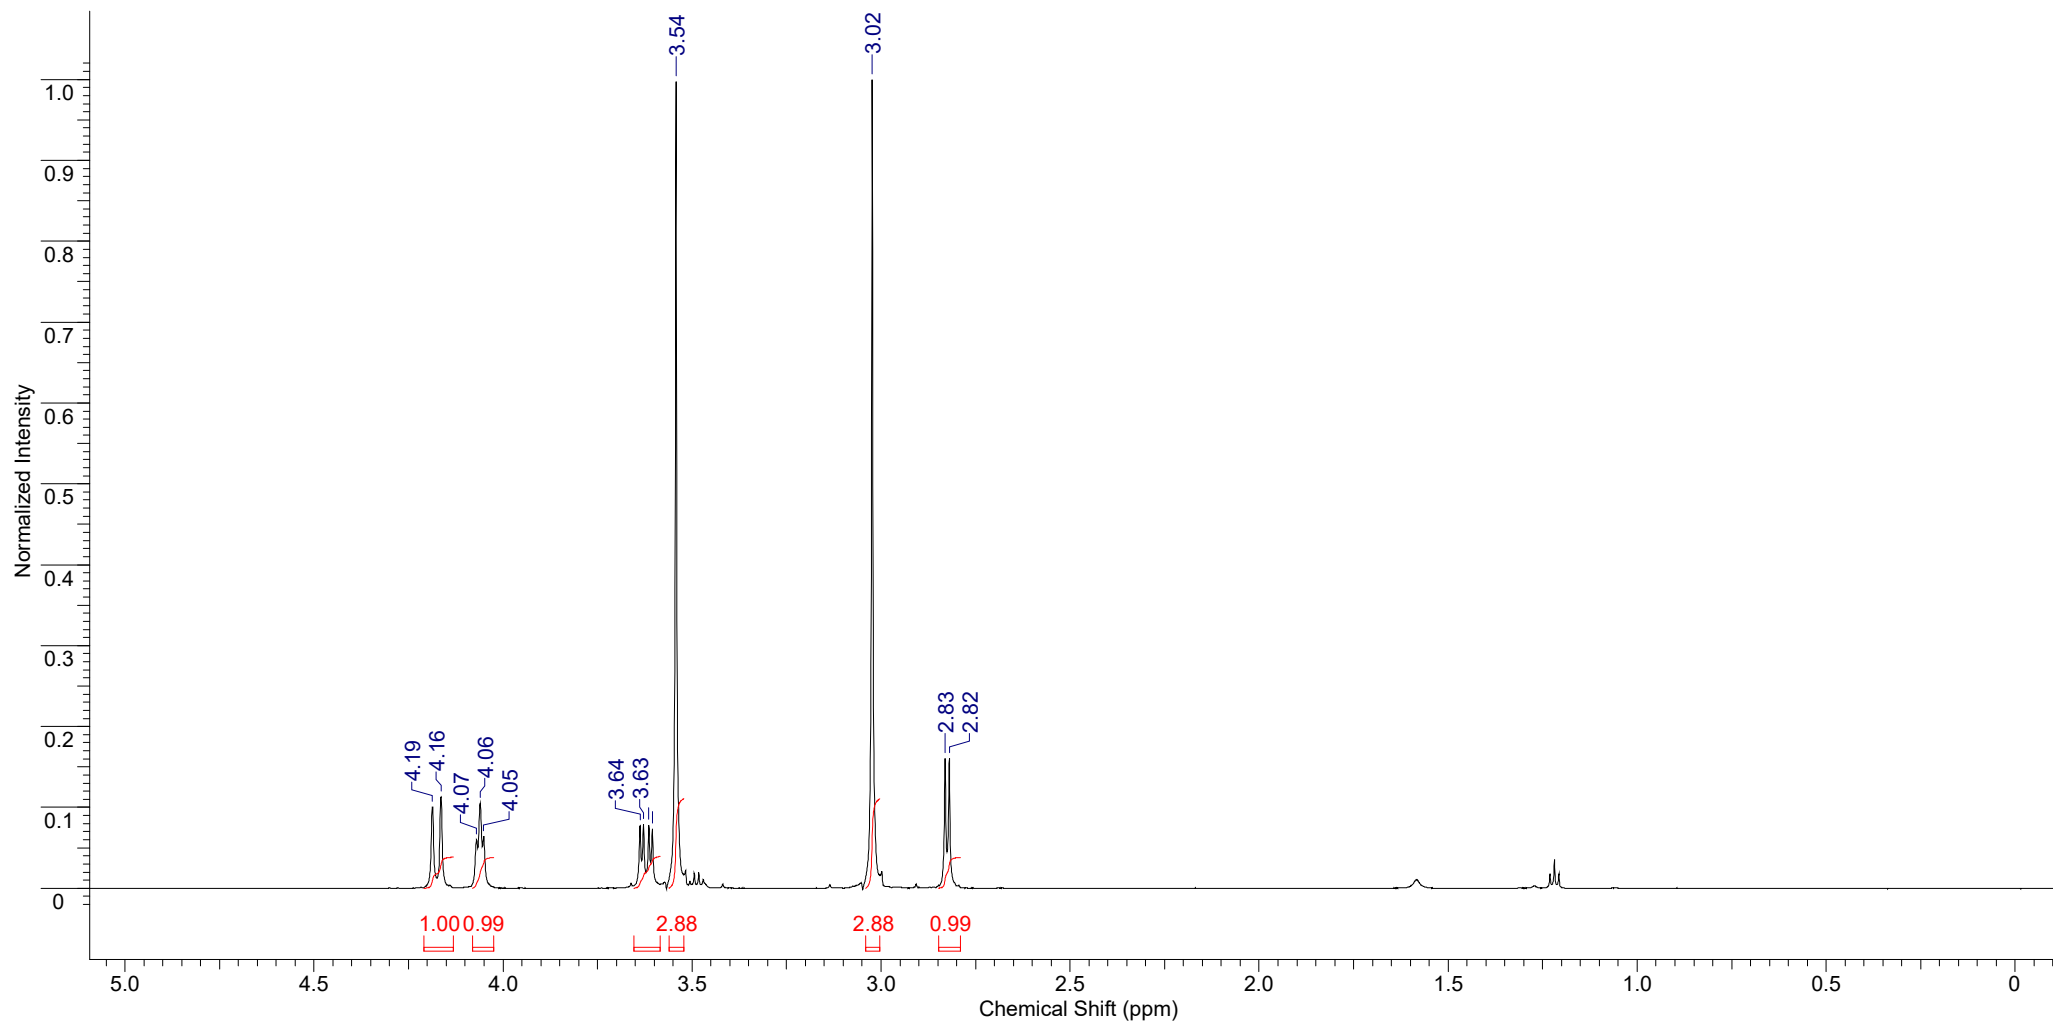

<sup>13</sup>C NMR spectra for 2i.

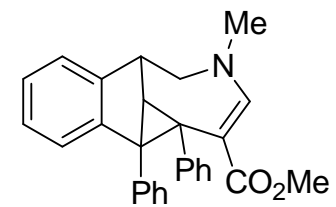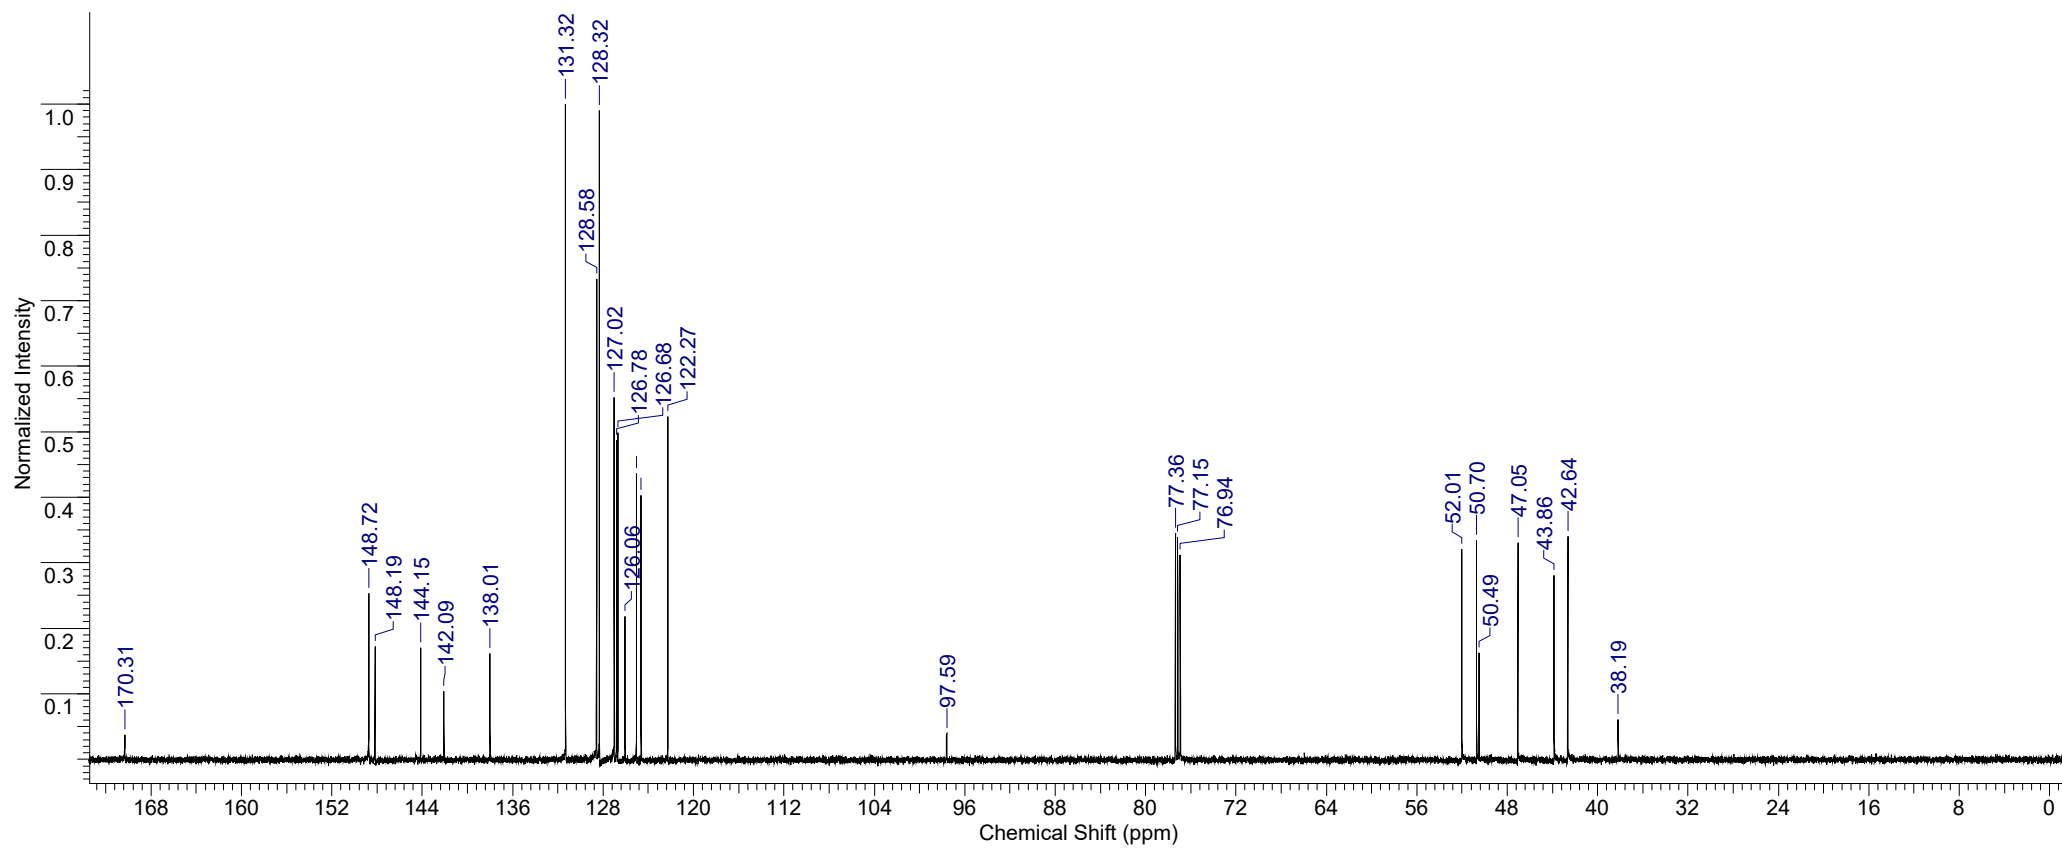

<sup>13</sup>C NMR spectra for 2i.

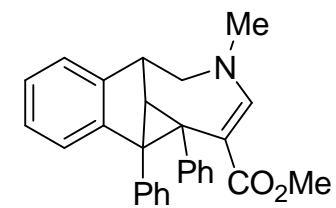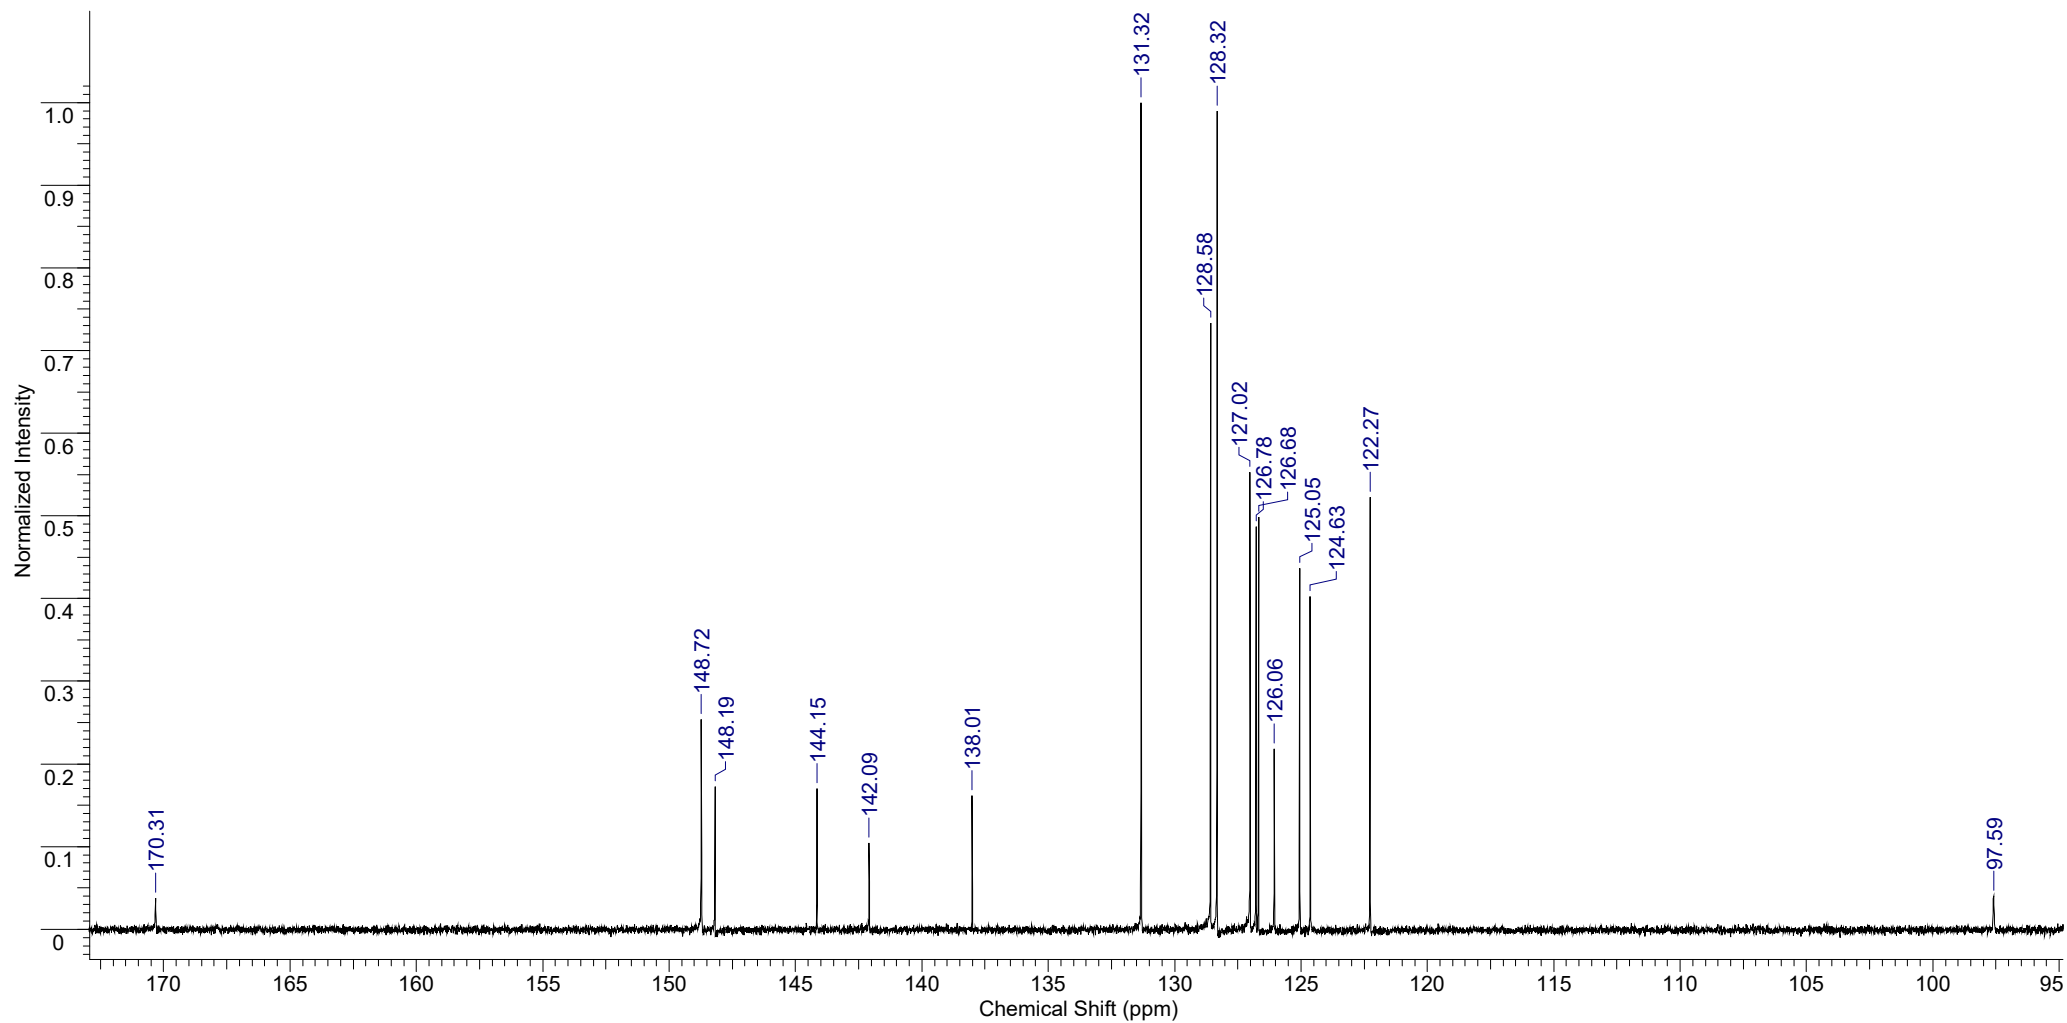

<sup>13</sup>C NMR spectra for 2i.

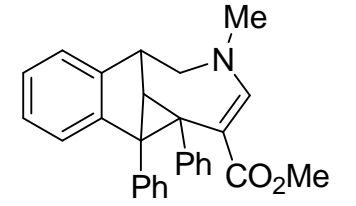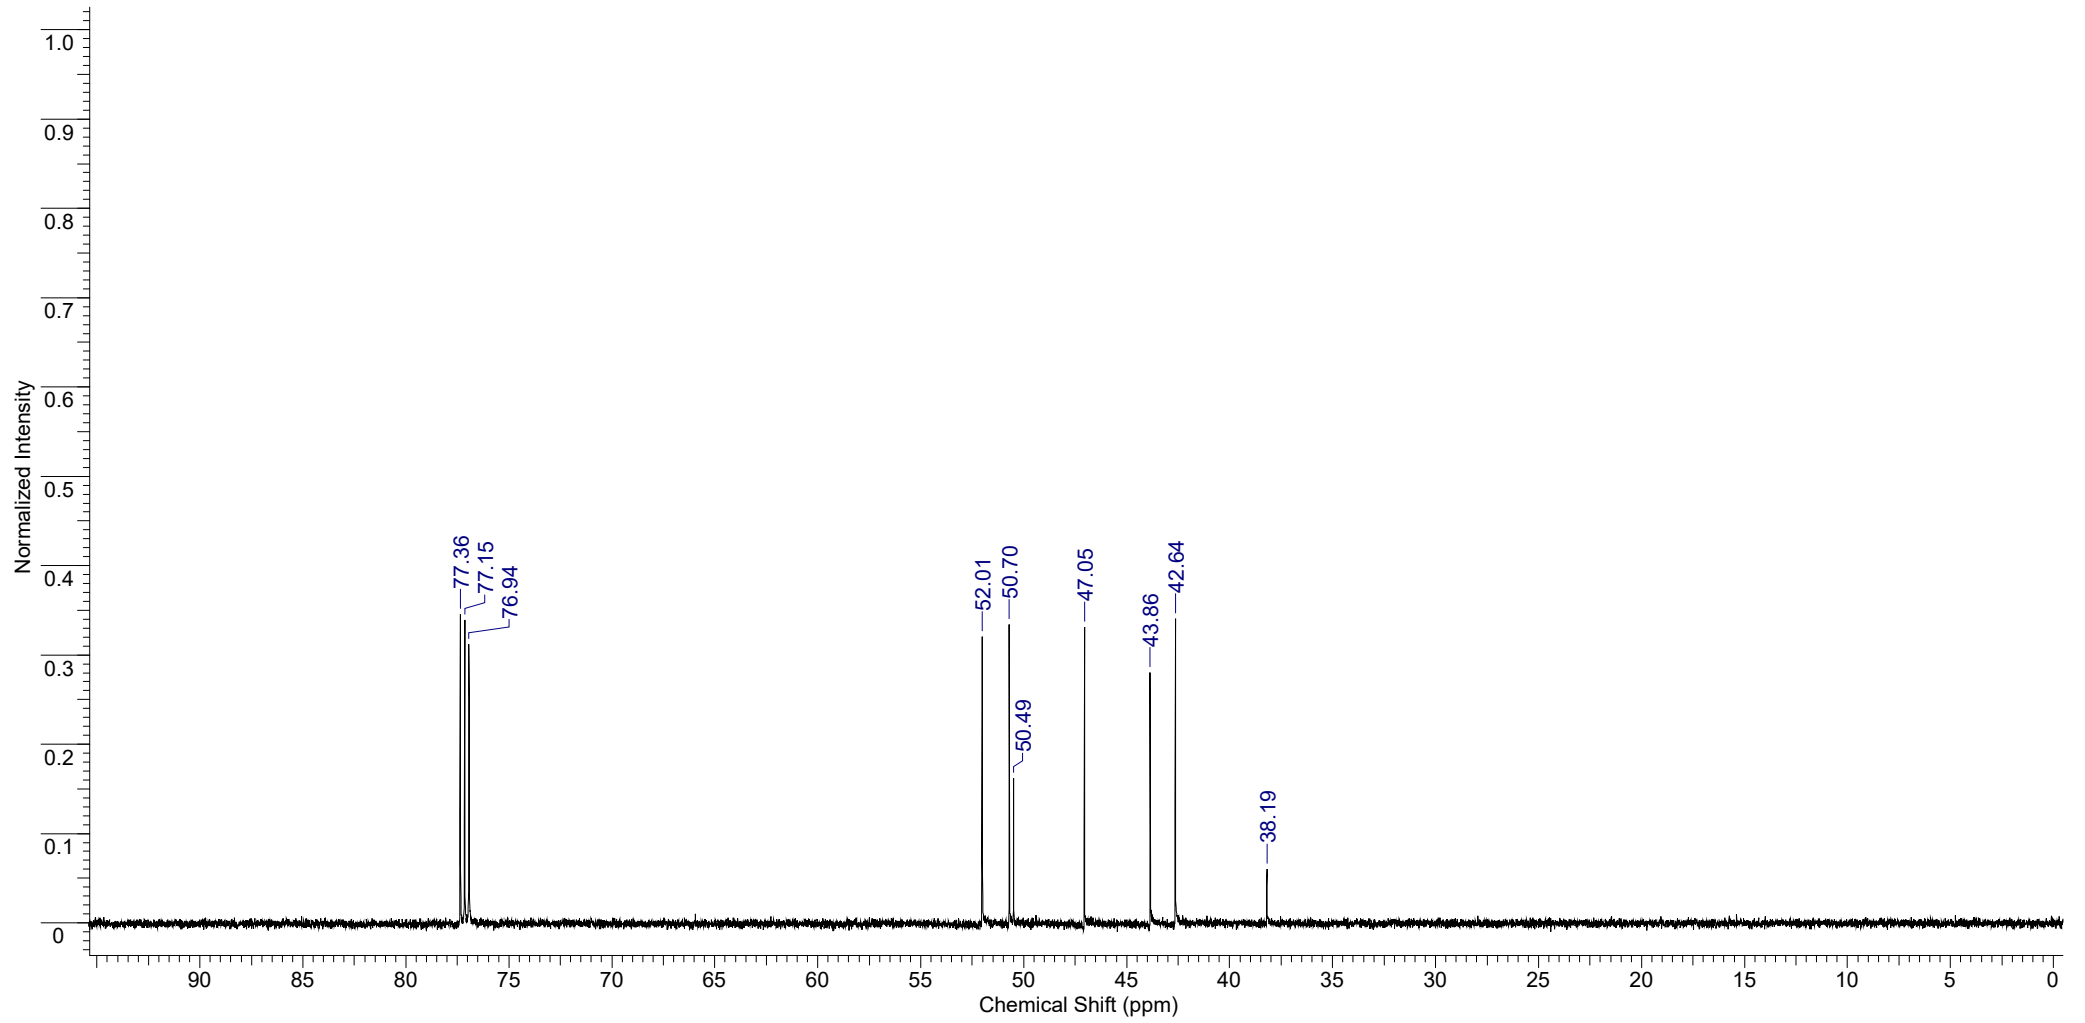

1-(2-Methyl-4a,4b-diphenyl-1,2,4a,4b,8b,8c-hexahydro-2-azabenzocyclopropa[cd]azulen-4-yl)ethanone (2j)

<sup>1</sup>H NMR spectra for 2j.

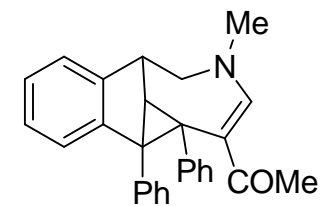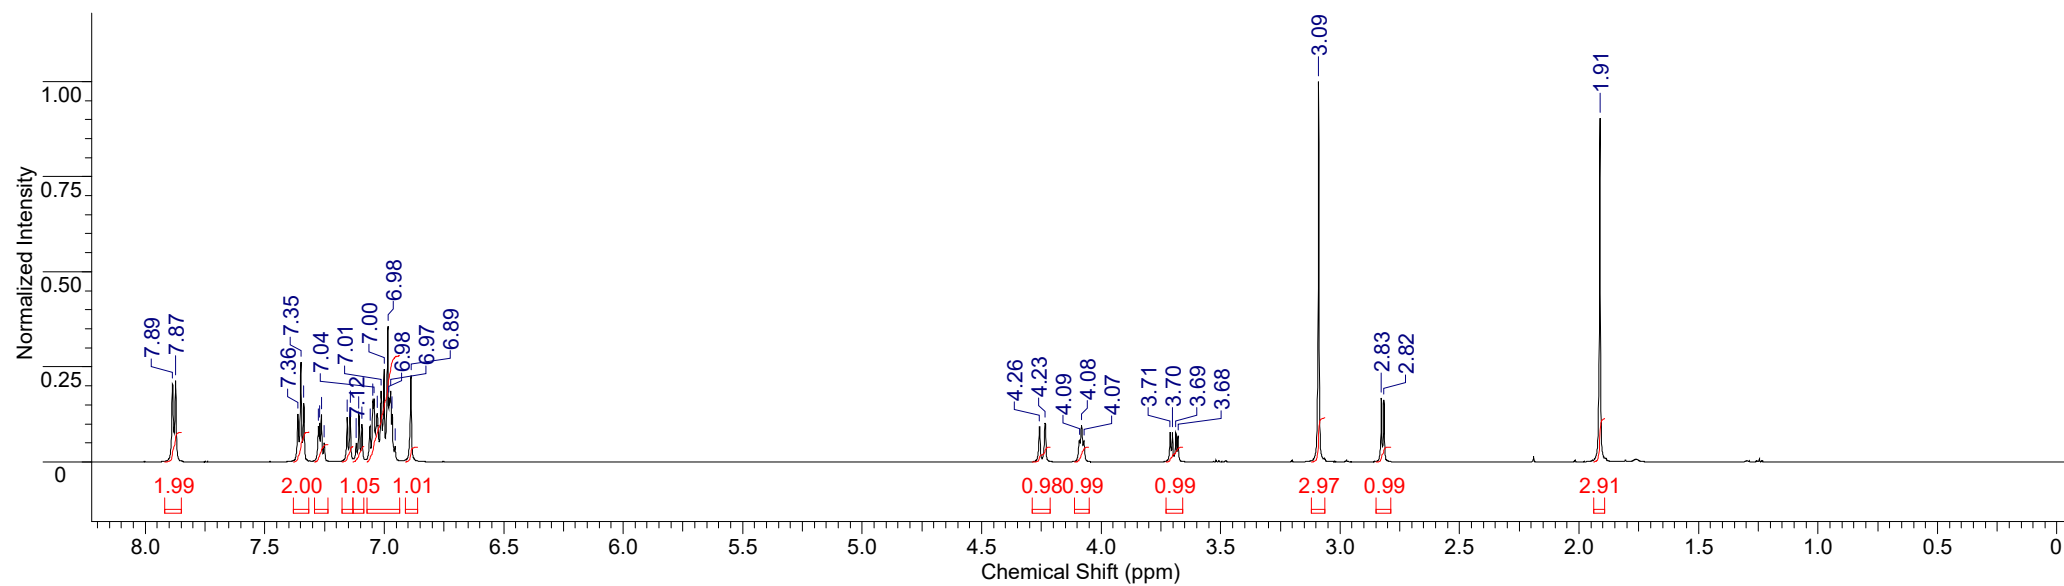



<sup>1</sup>H NMR spectra for 2j.

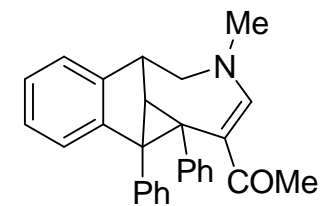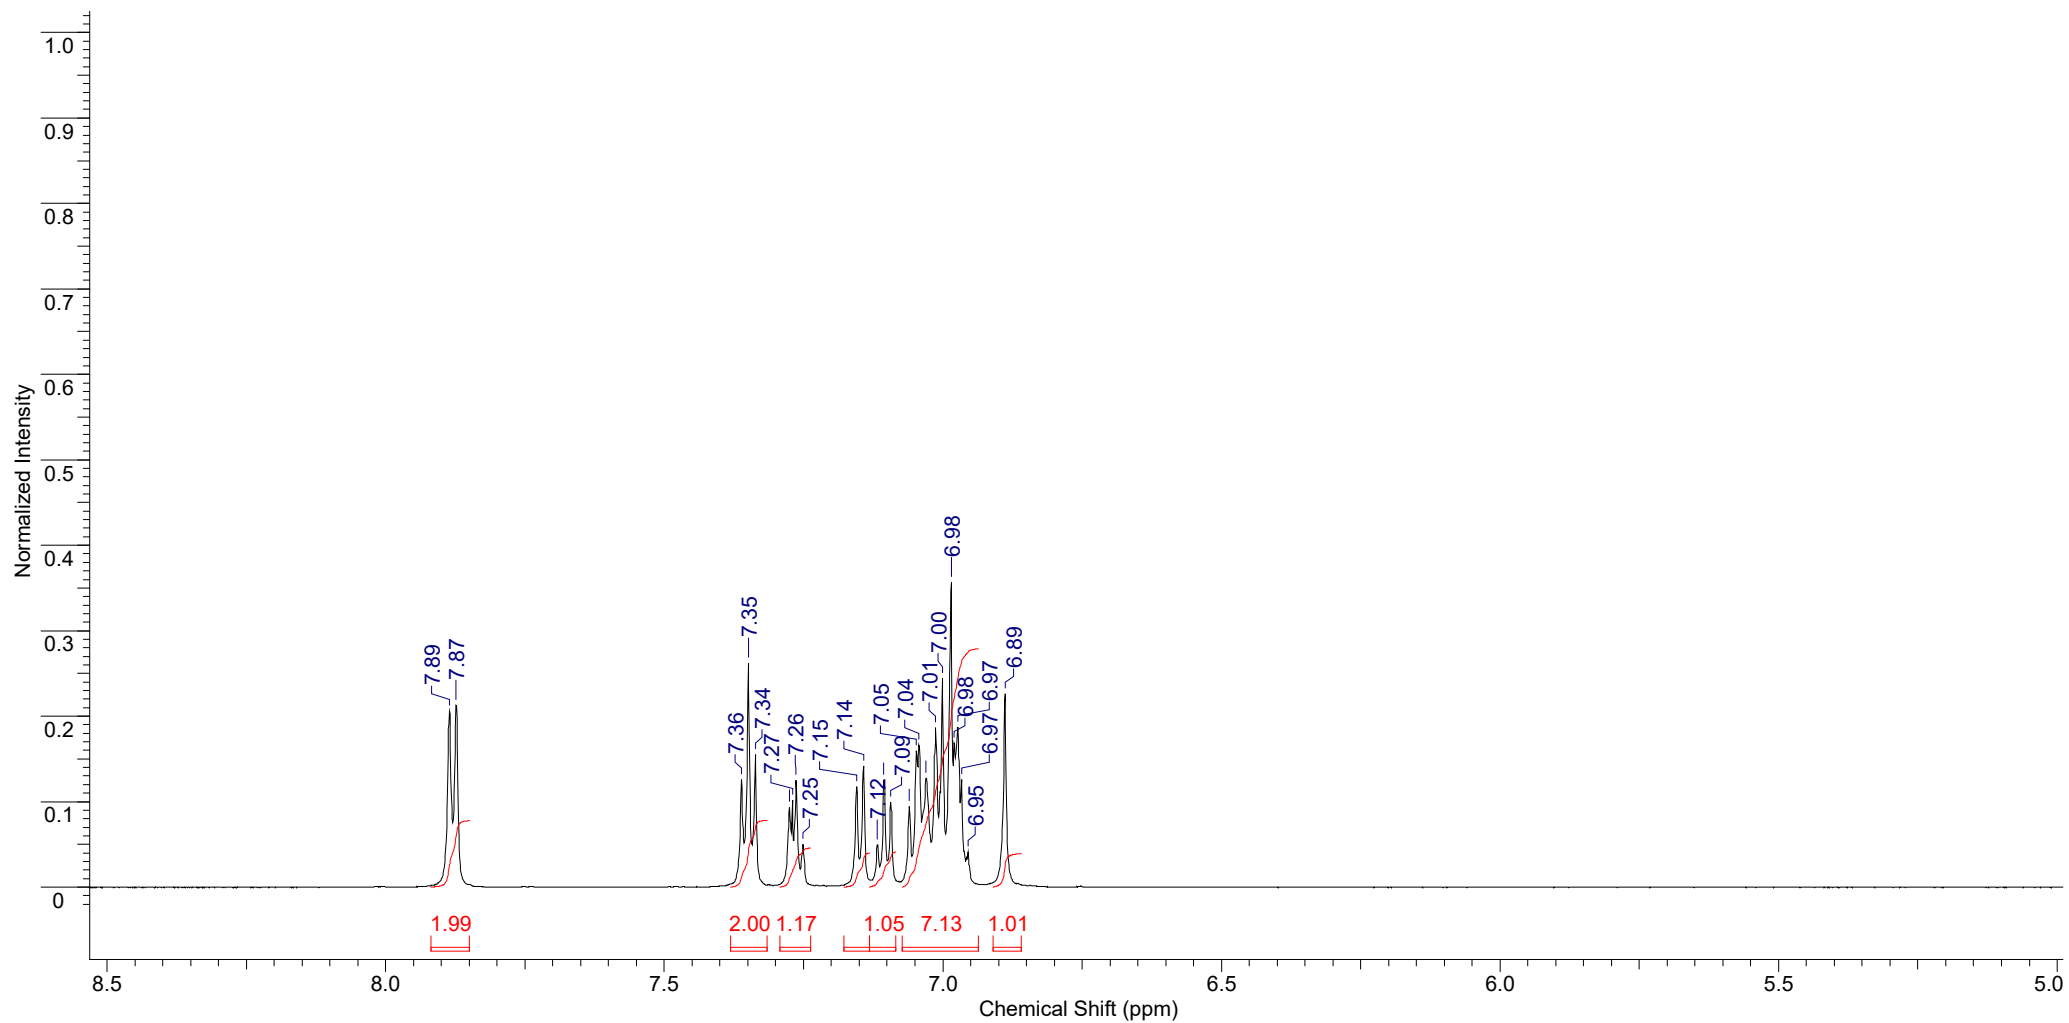

<sup>1</sup>H NMR spectra for 2j.

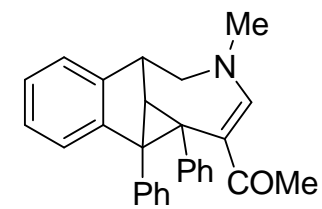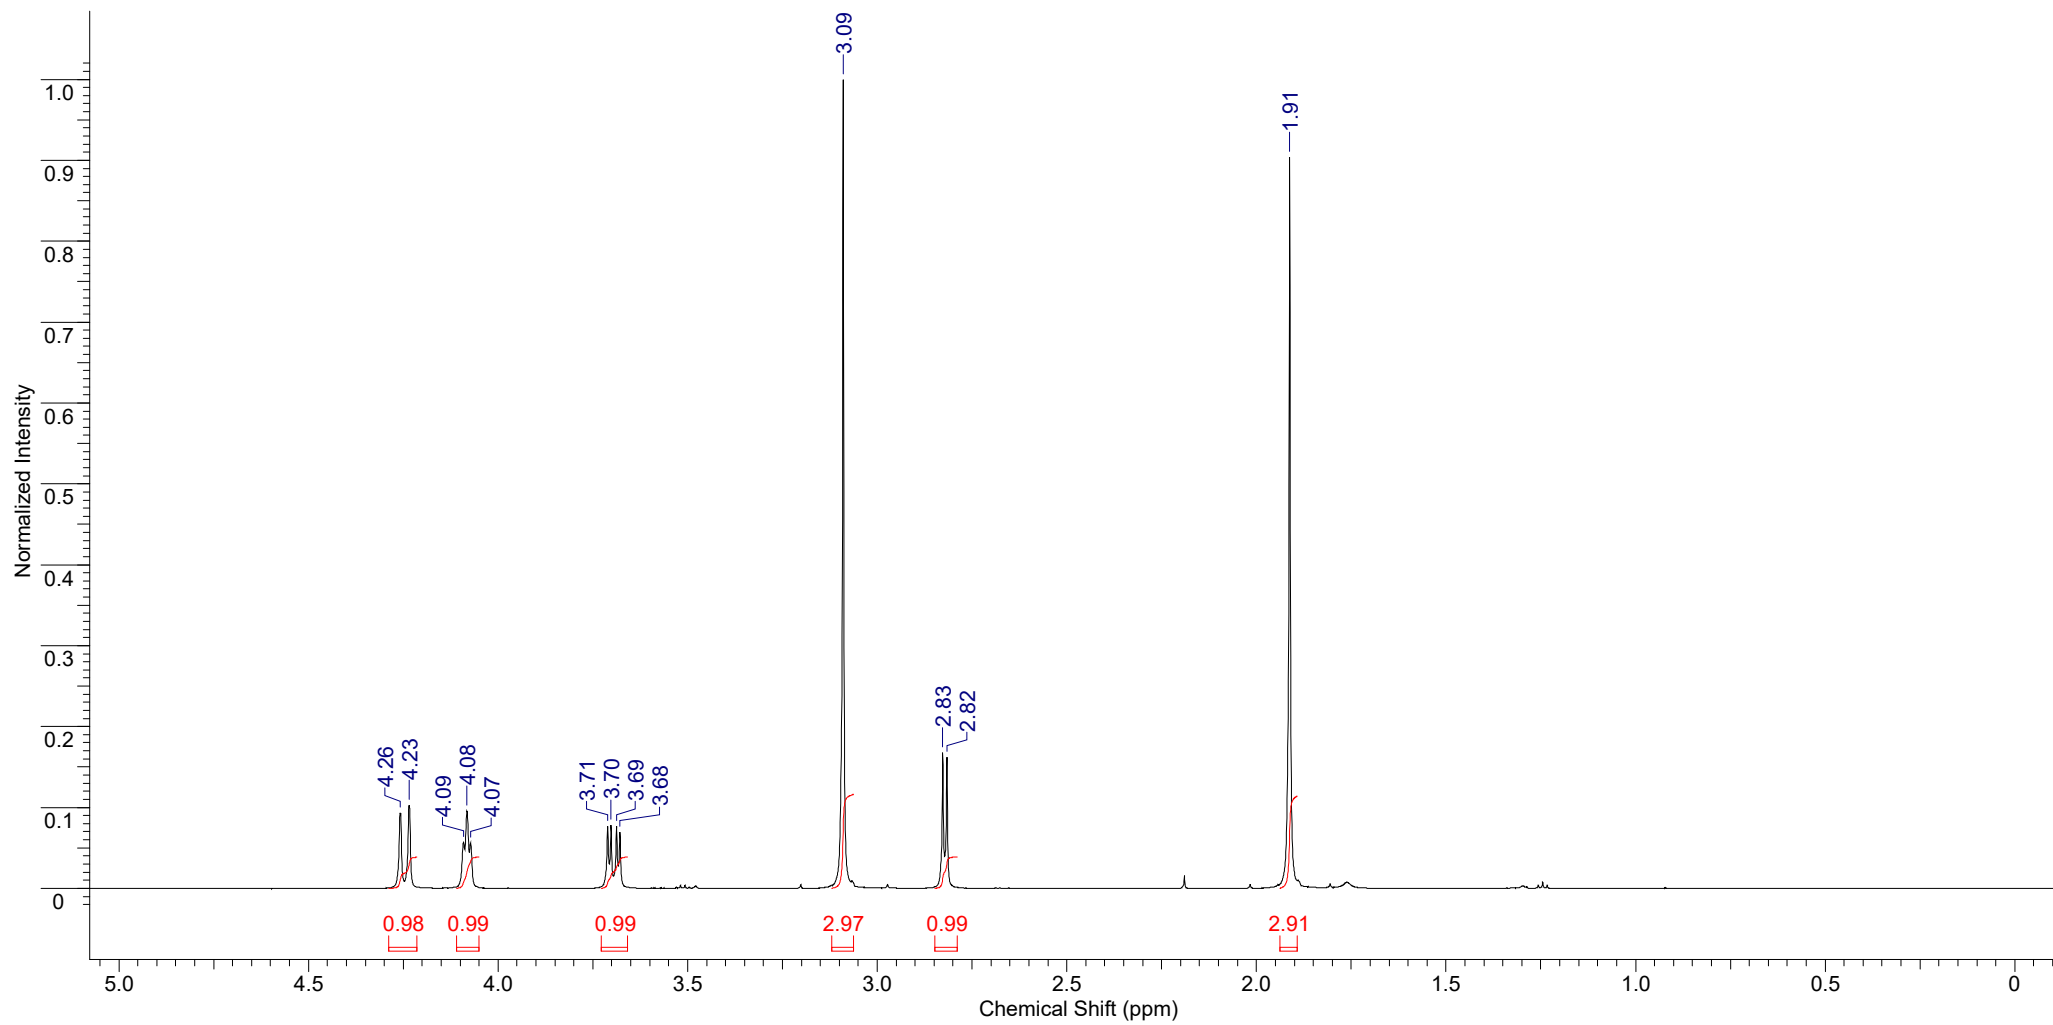

<sup>13</sup>C NMR spectra for 2j.

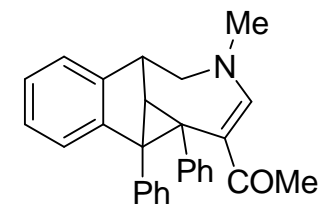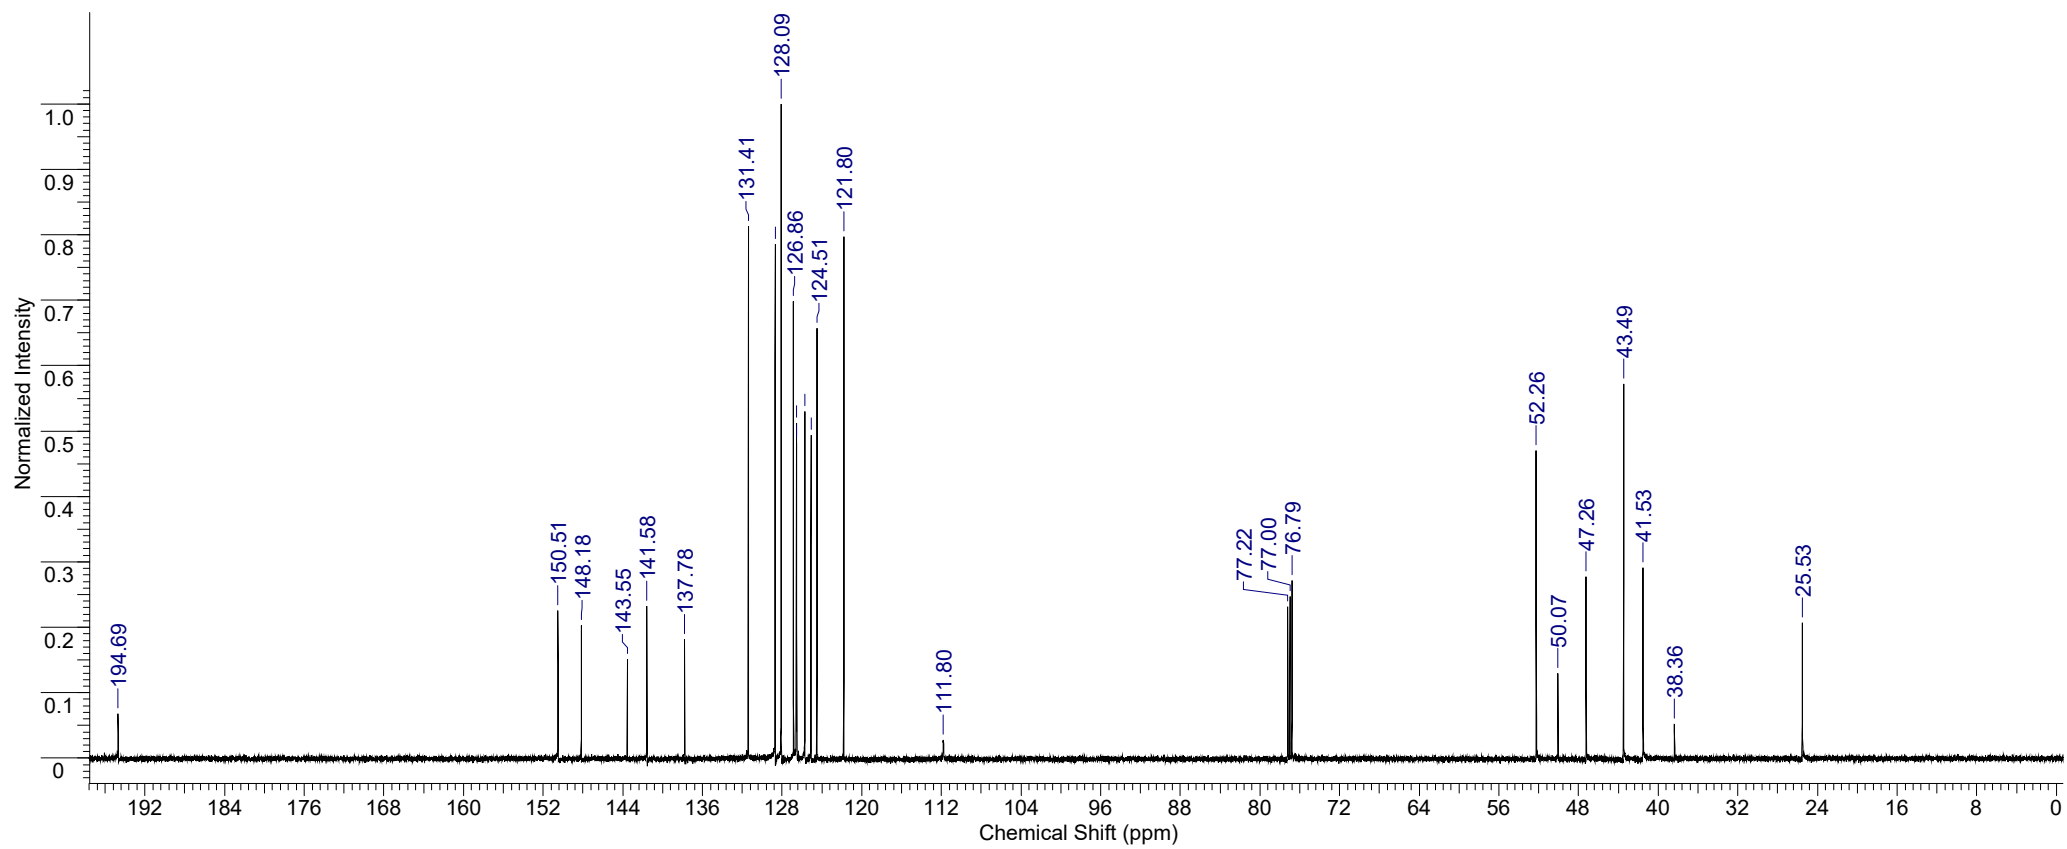

<sup>13</sup>C NMR spectra for 2j.

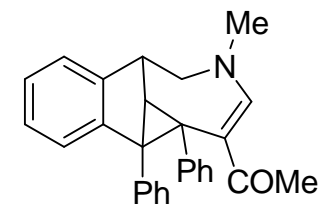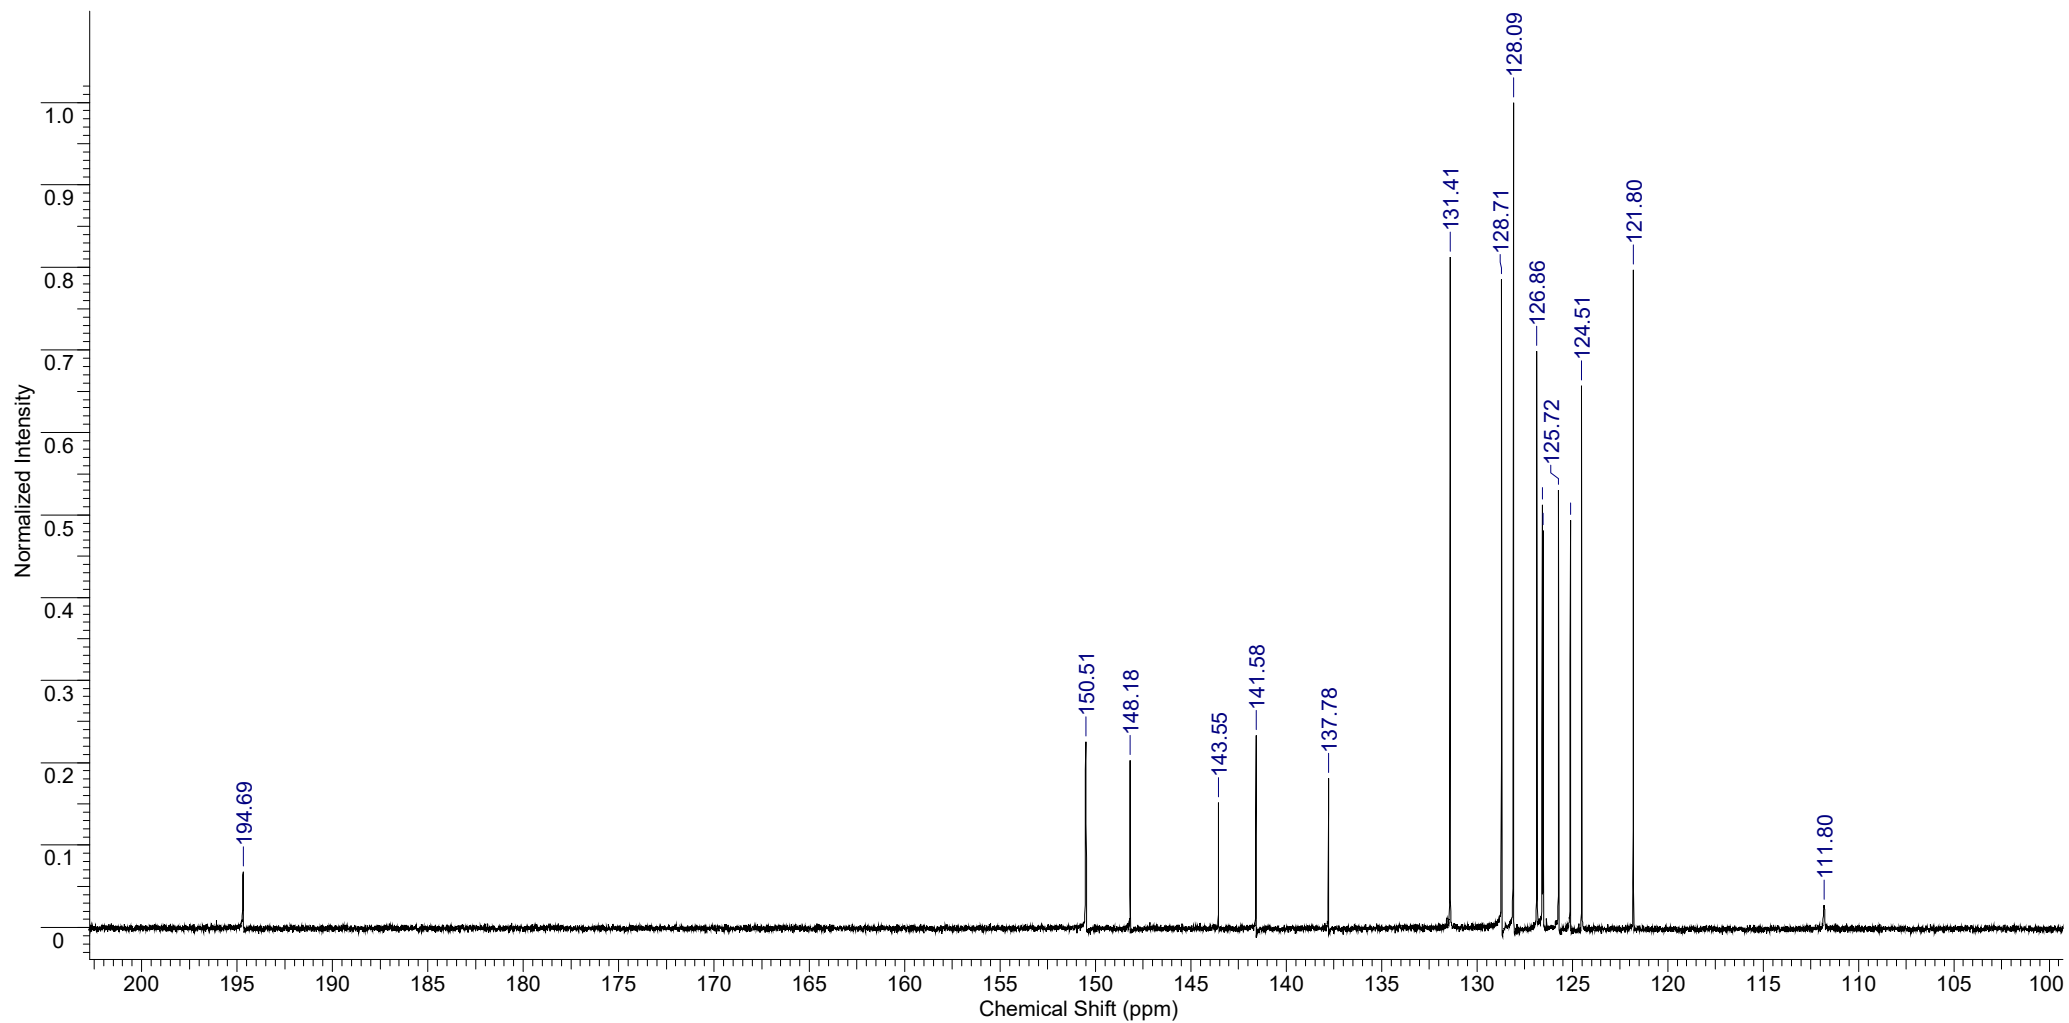

<sup>13</sup>C NMR spectra for 2j.

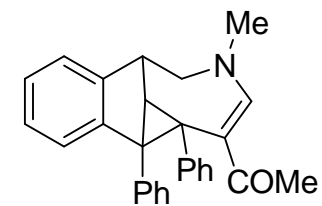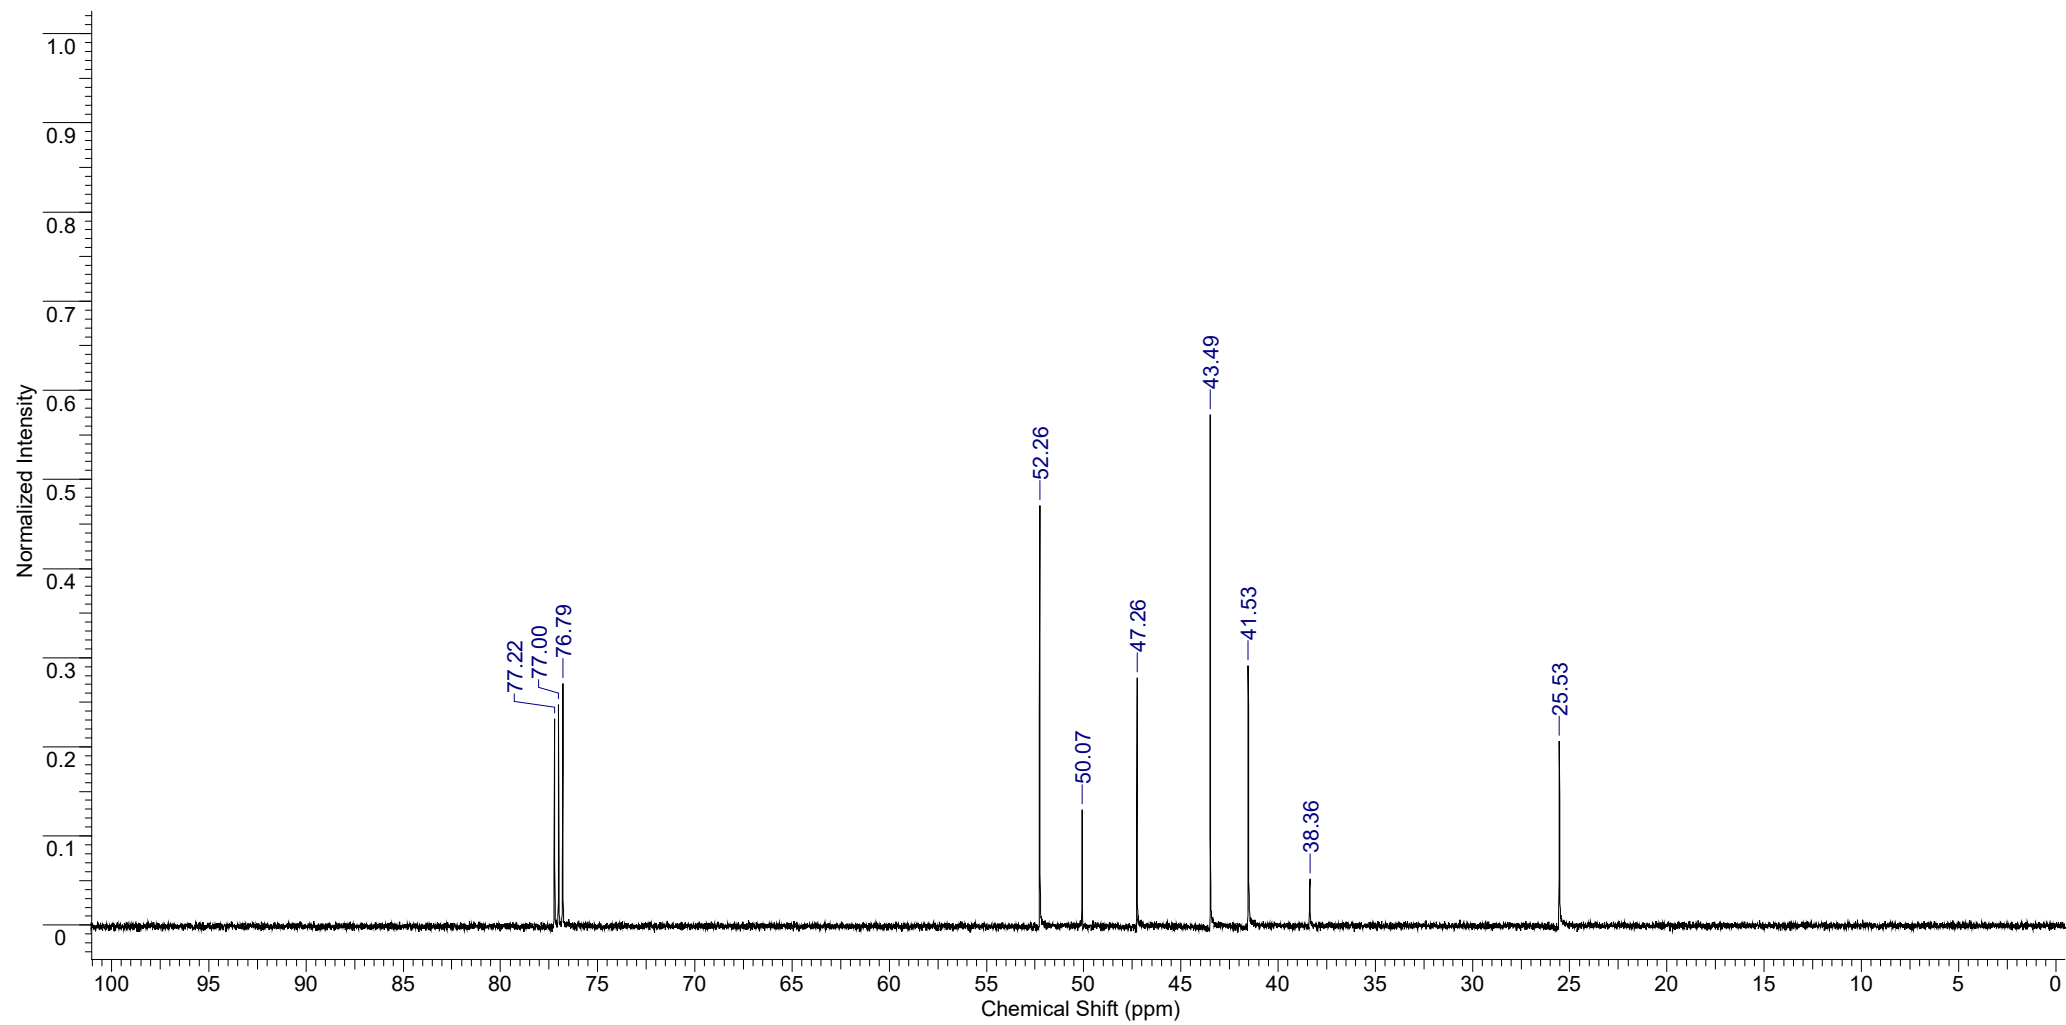

Methyl 6,7-dimethoxy-2-methyl-4a,4b-diphenyl-1,2,4a,4b,8b,8c-hexahydro-2-azabenz[a]cyclopropa[cd]azulene-4-carboxylate (2k)

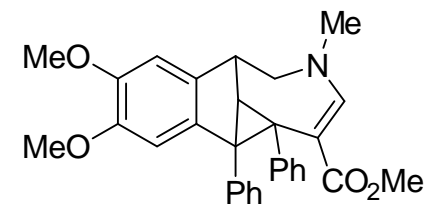

<sup>1</sup>H NMR spectra for 2k.

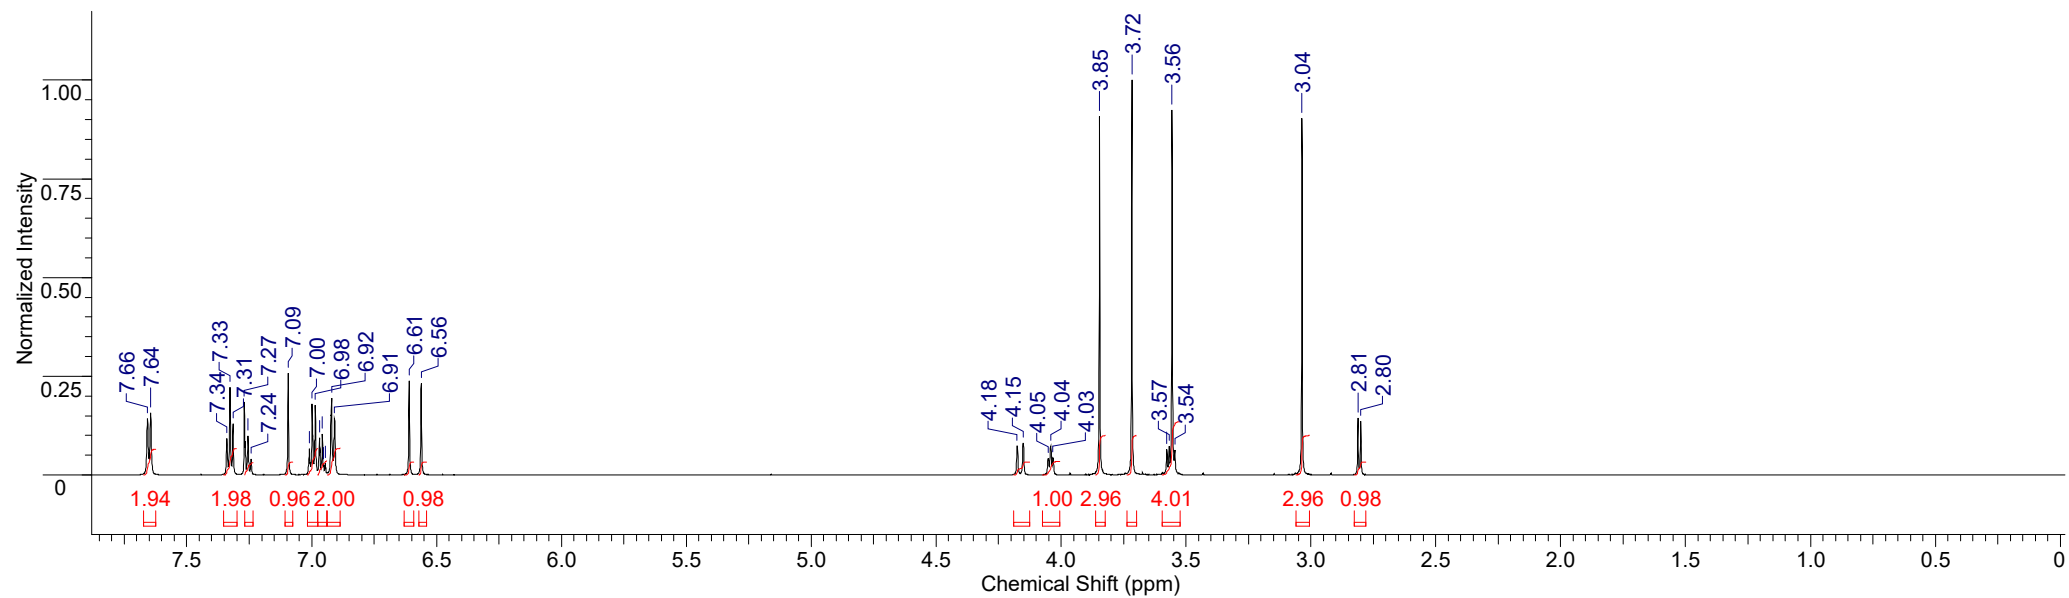

<sup>1</sup>H NMR spectra for 2k.

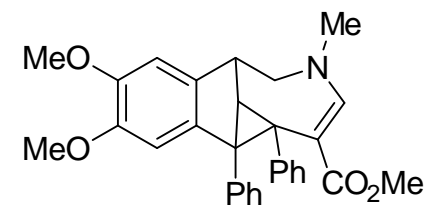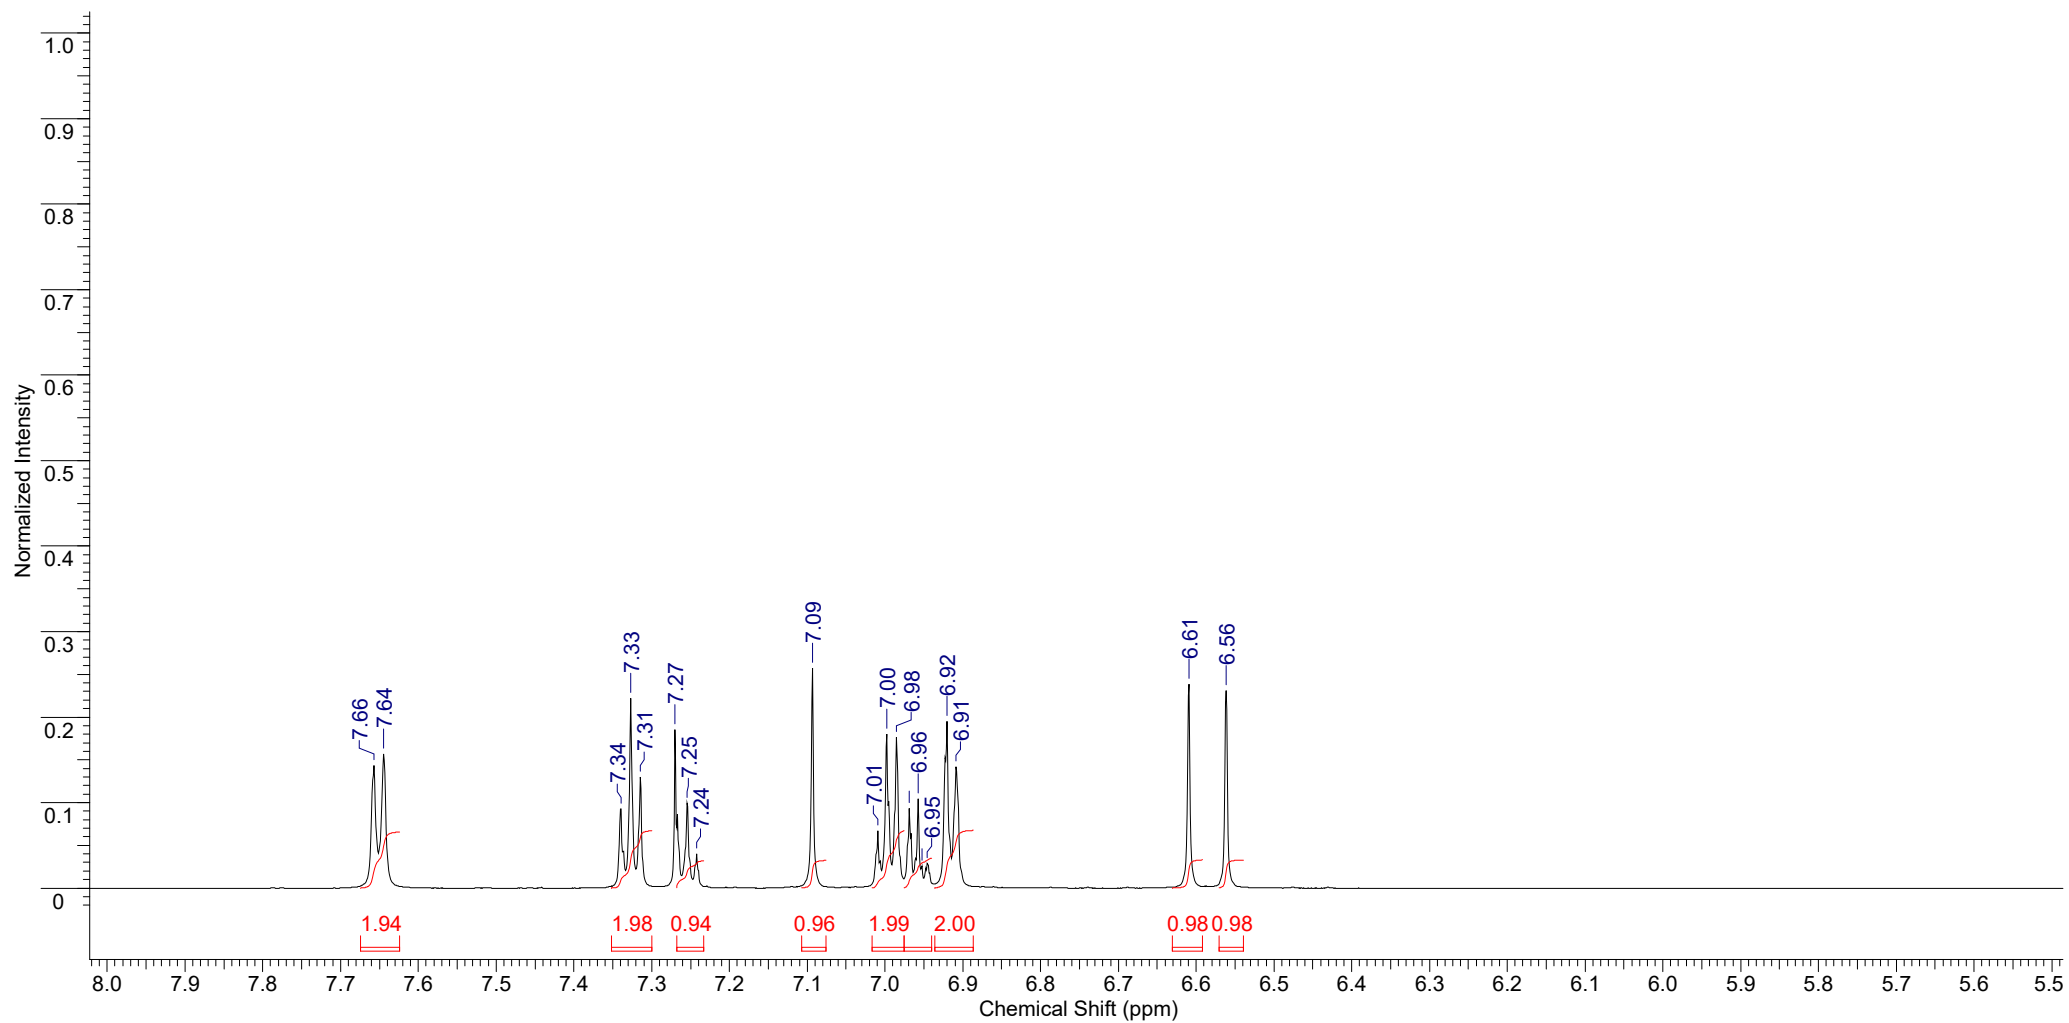

<sup>1</sup>H NMR spectra for 2k.

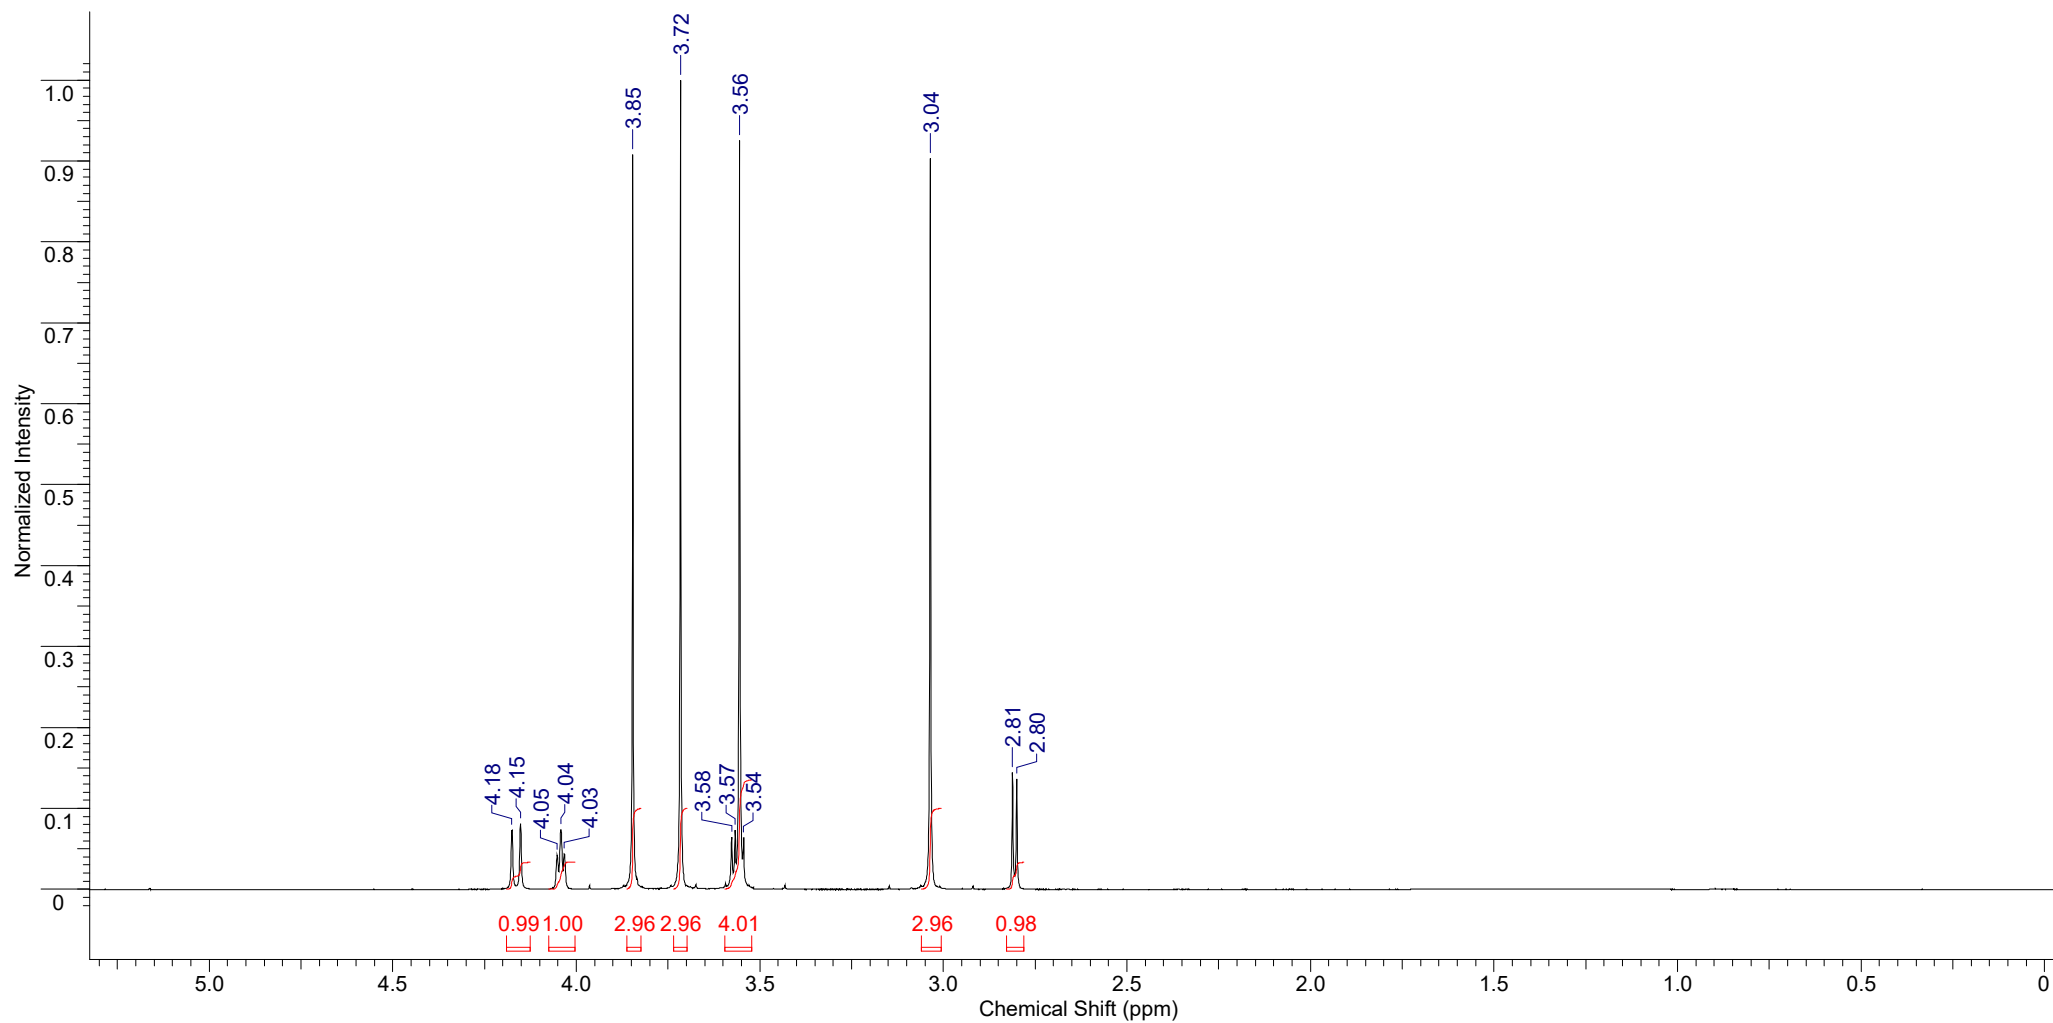



<sup>13</sup>C NMR spectra for 2k.

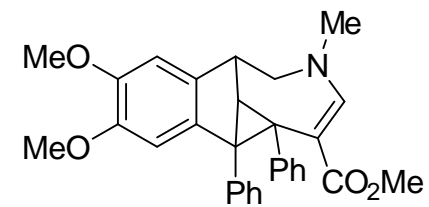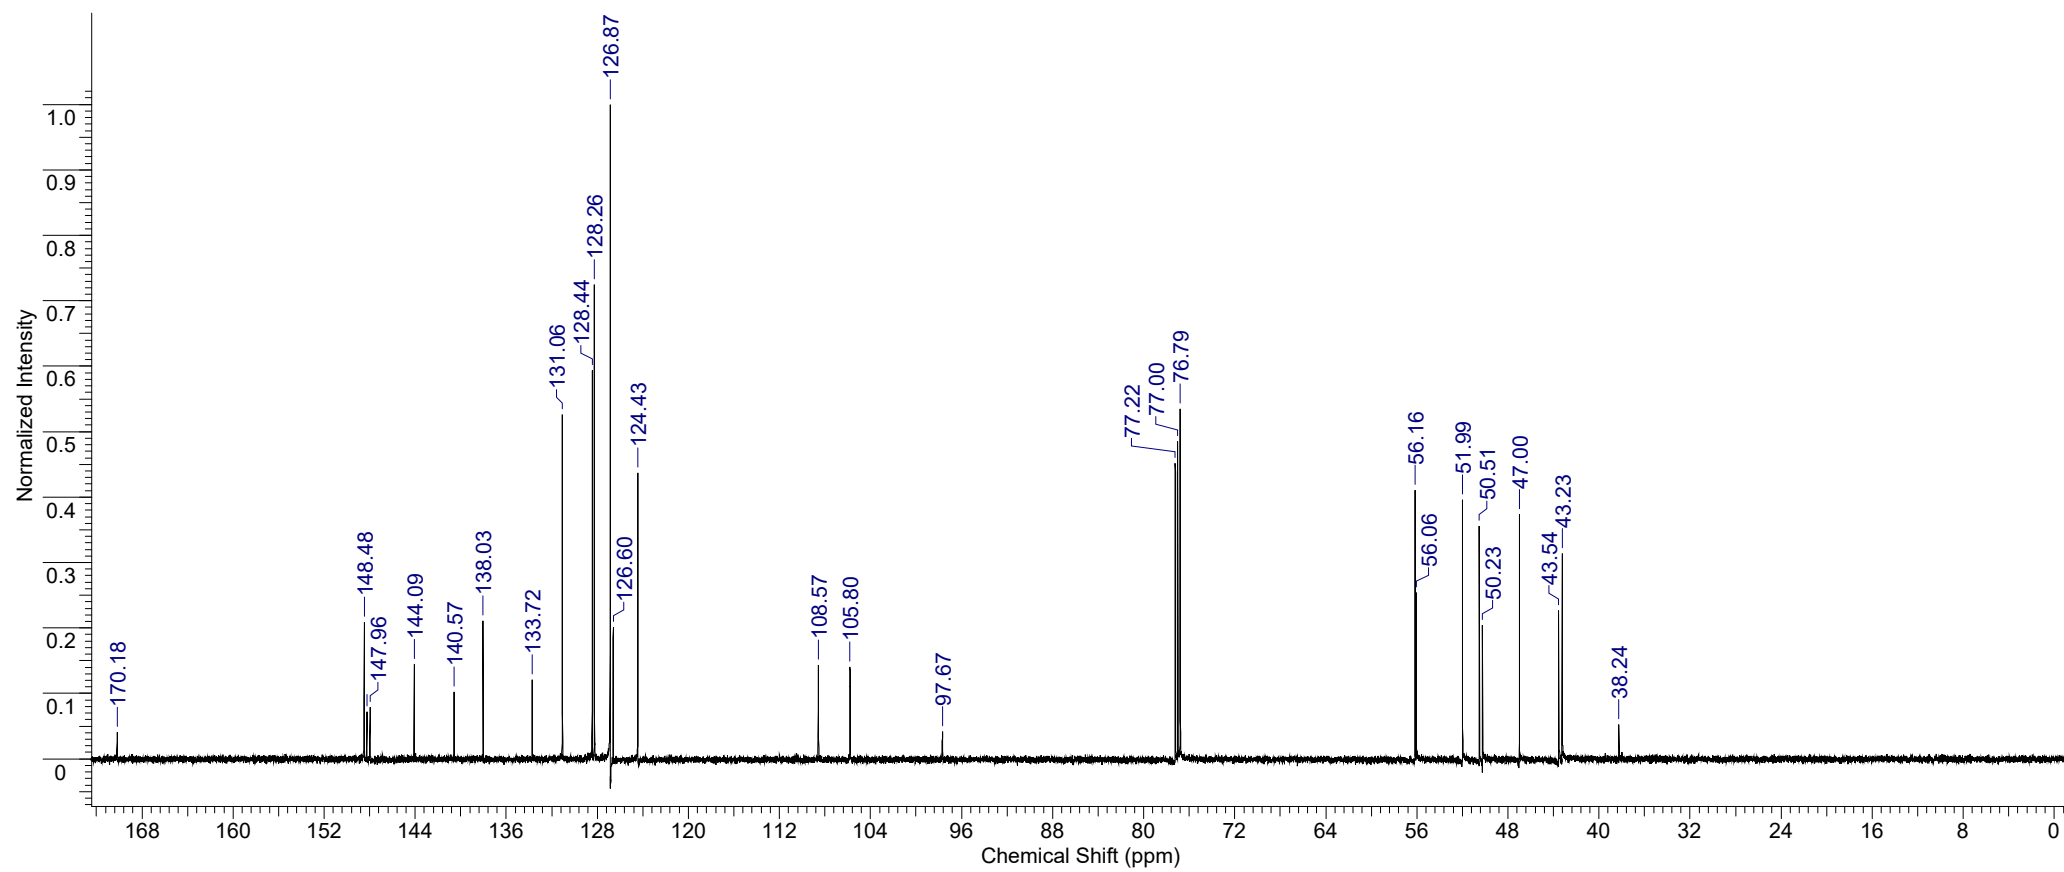

<sup>13</sup>C NMR spectra for 2k.

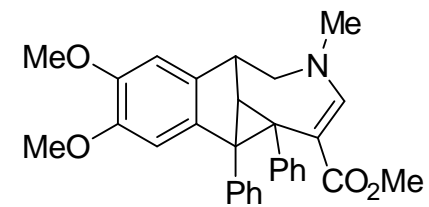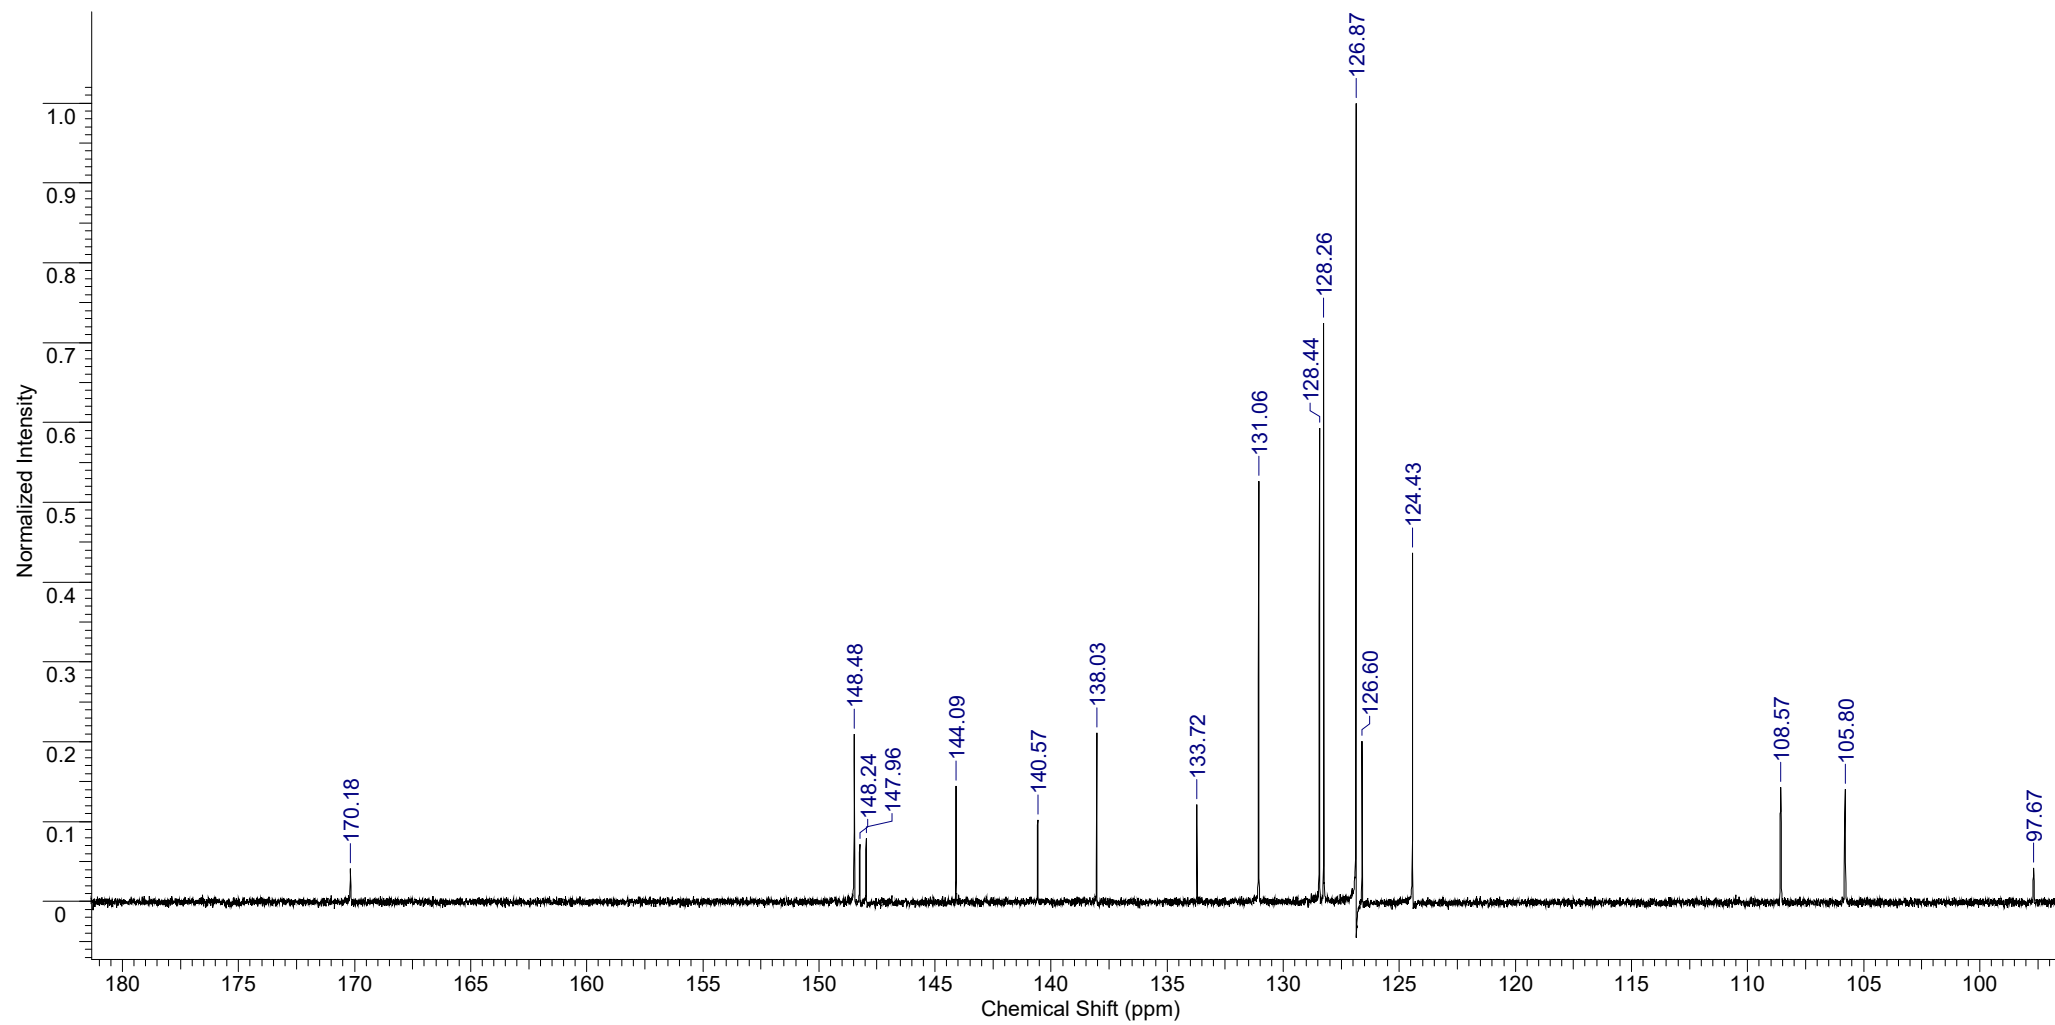

<sup>13</sup>C NMR spectra for 2k.

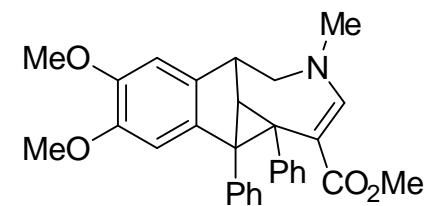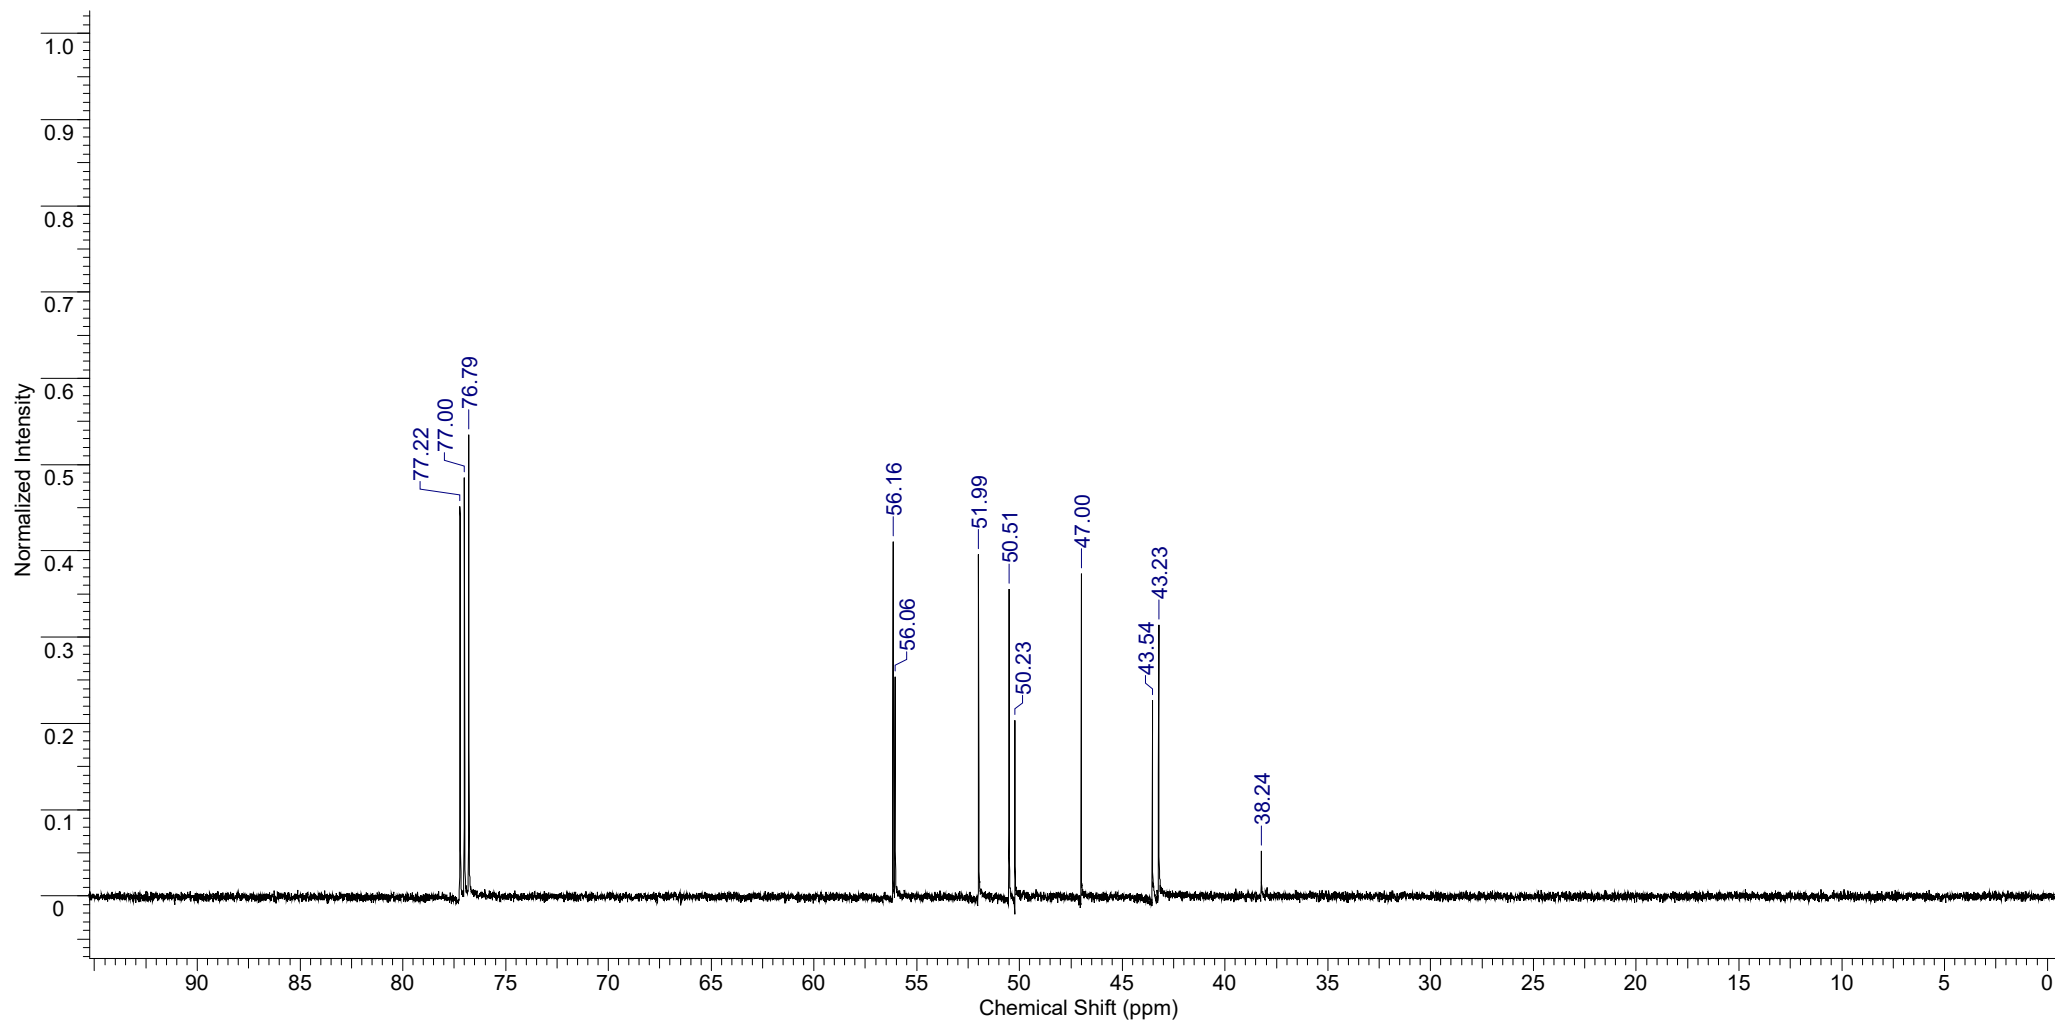

1-(6,7-Dimethoxy-2-methyl-4a,4b-diphenyl-1,2,4a,4b,8b,8c-hexahydro-2-azabenz[*a*]cyclopropa[*cd*]azulen-4-yl)ethanone (2l)

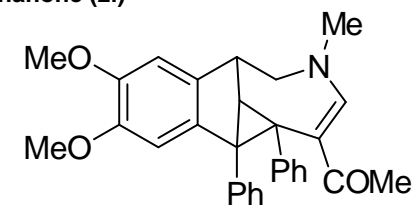

$^1\text{H}$  NMR spectra for 2l.

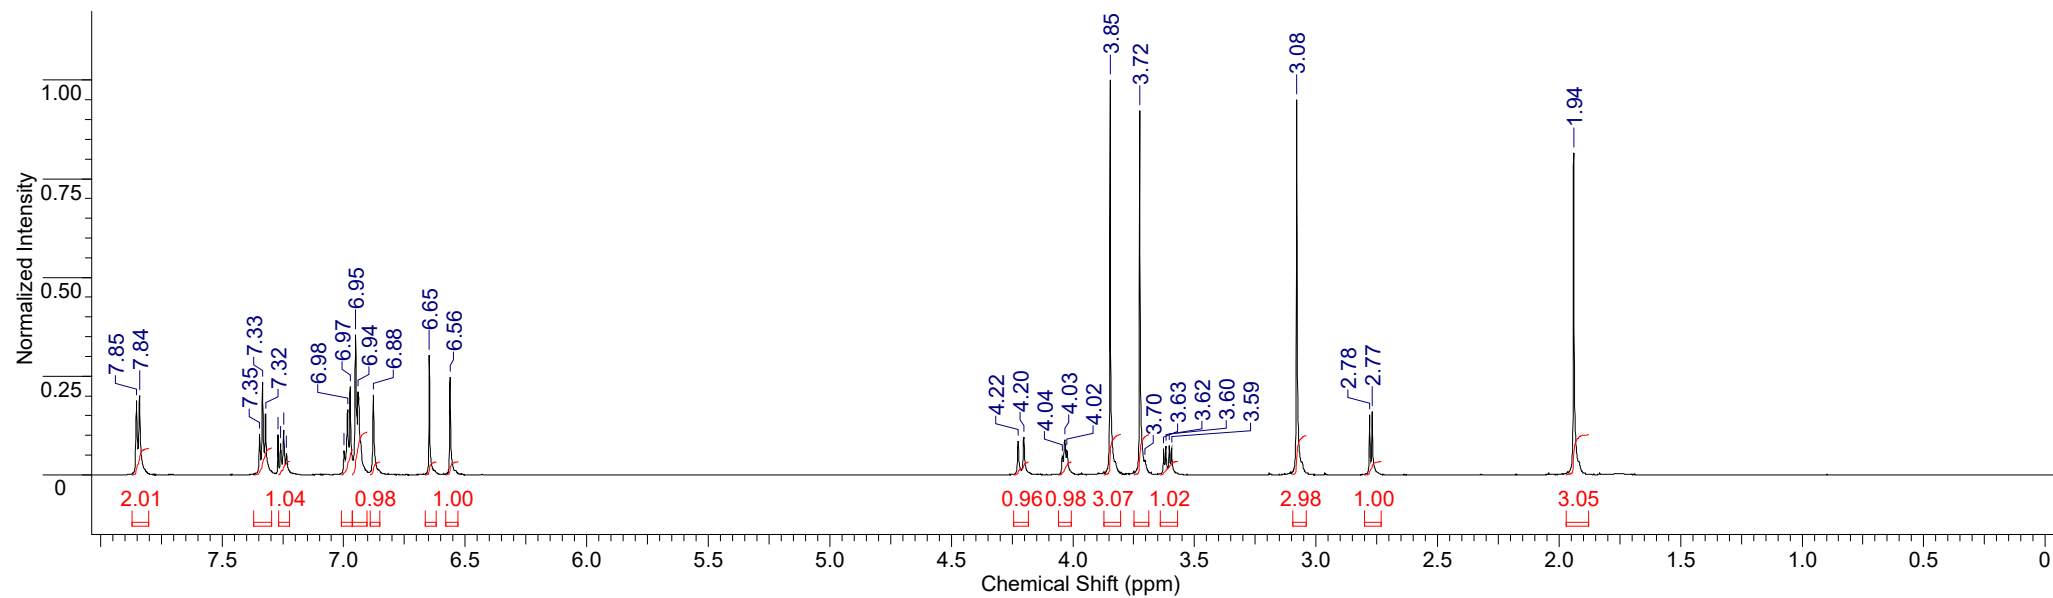

<sup>1</sup>H NMR spectra for 2l.

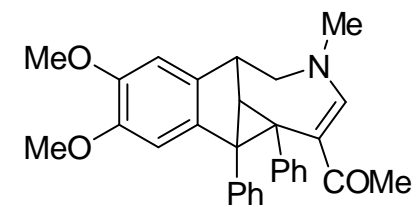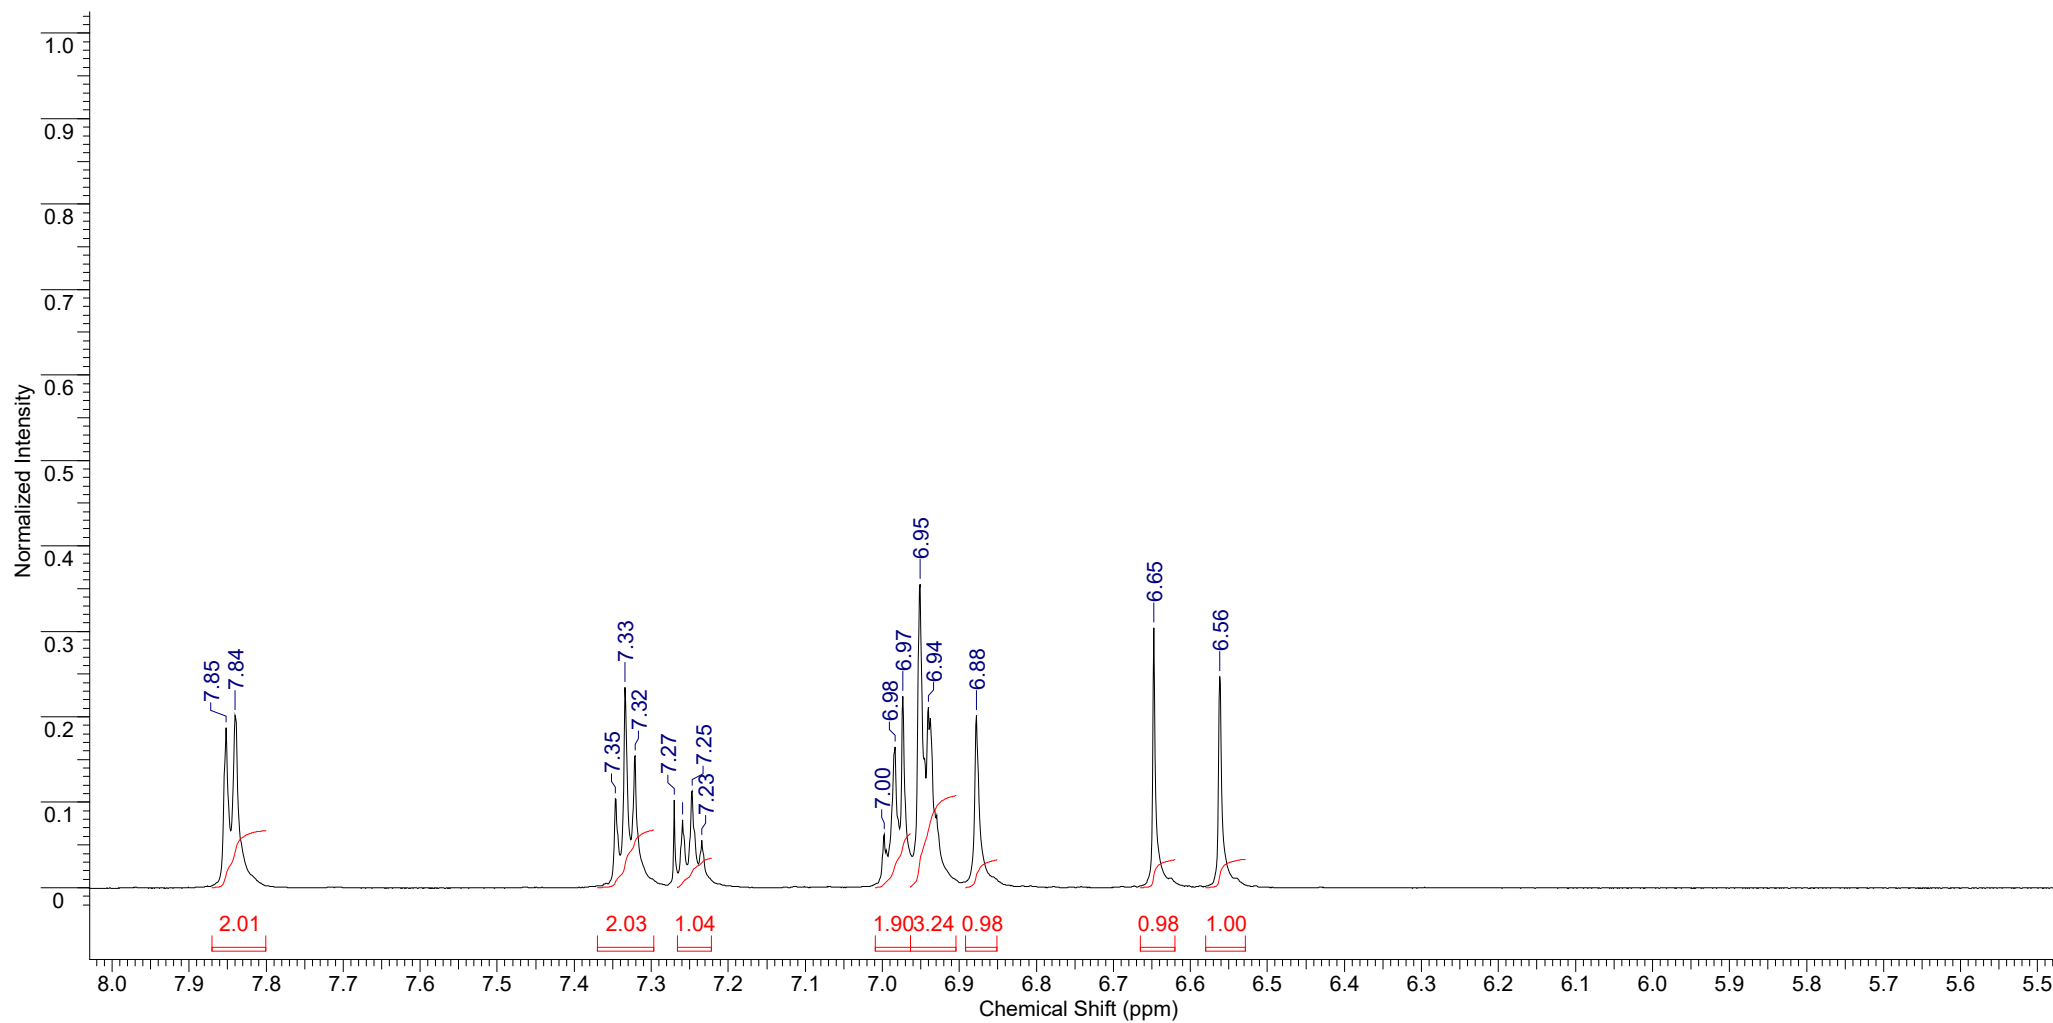

<sup>1</sup>H NMR spectra for 2l.

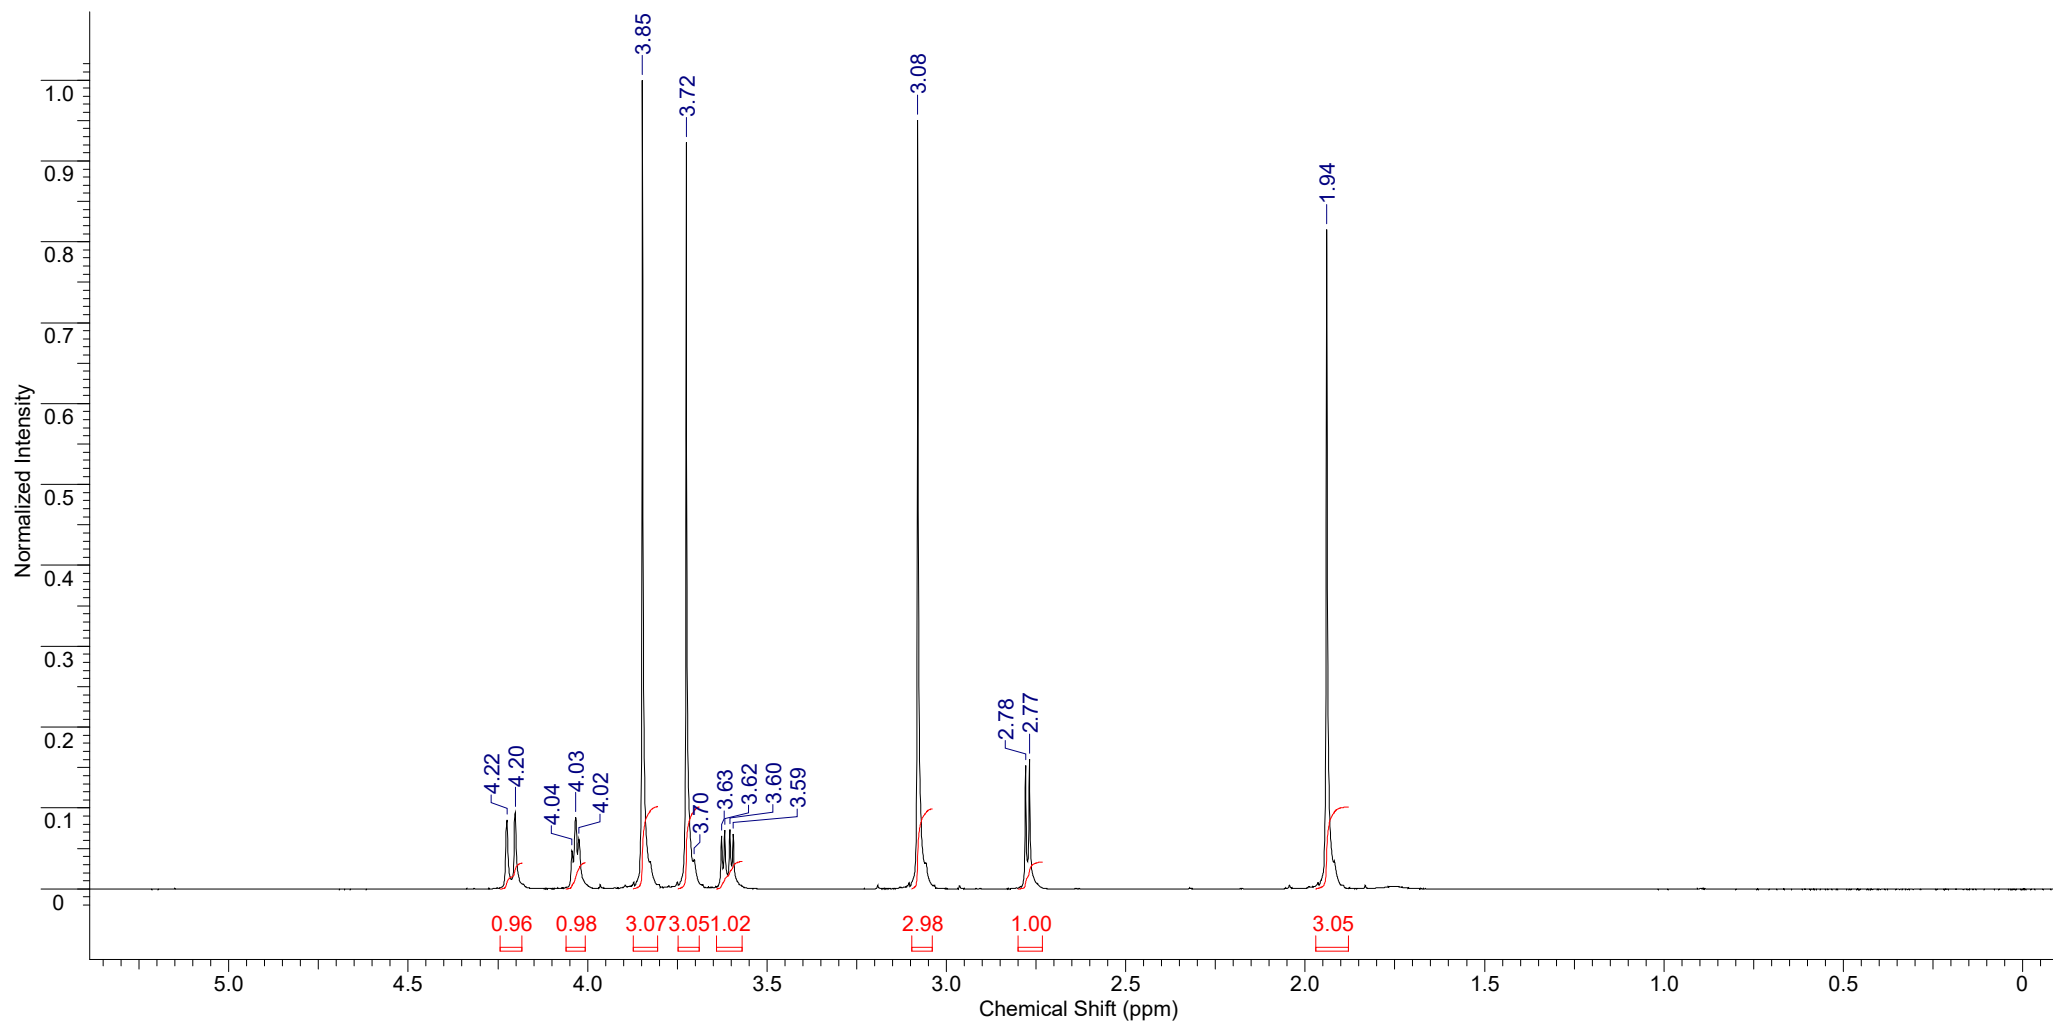

<sup>13</sup>C NMR spectra for 2l.

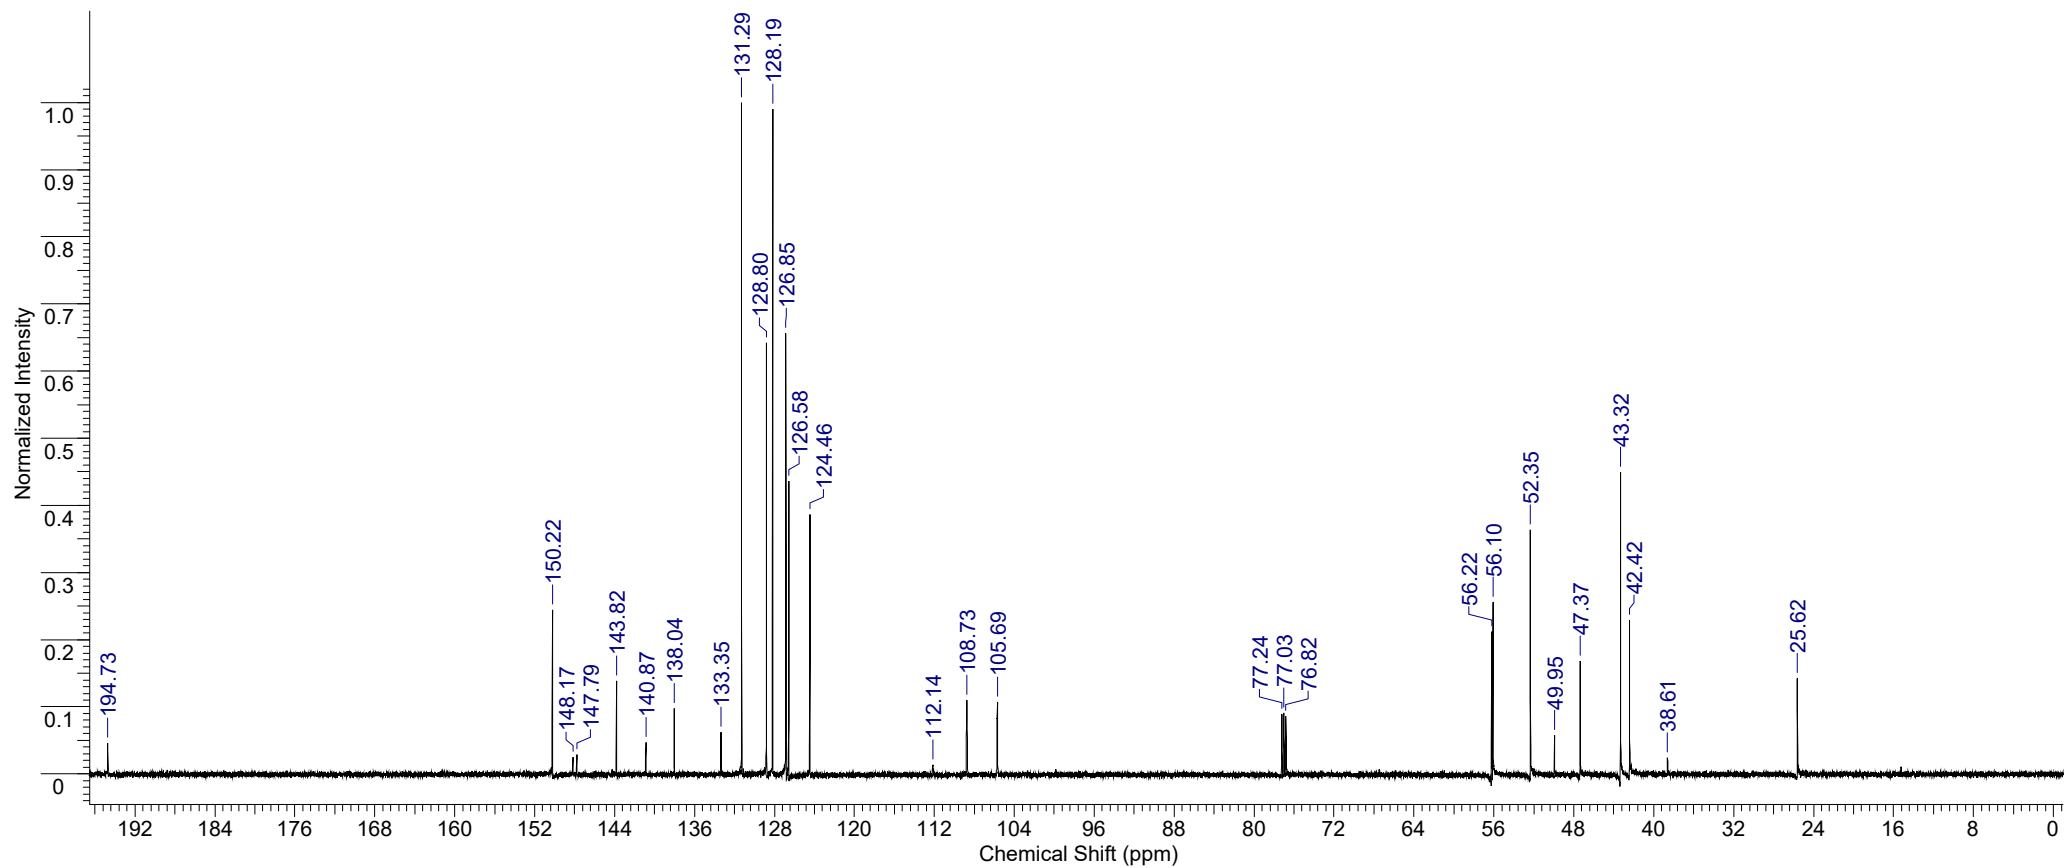

<sup>13</sup>C NMR spectra for 2l.

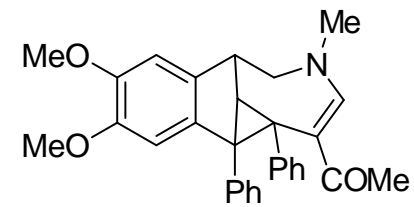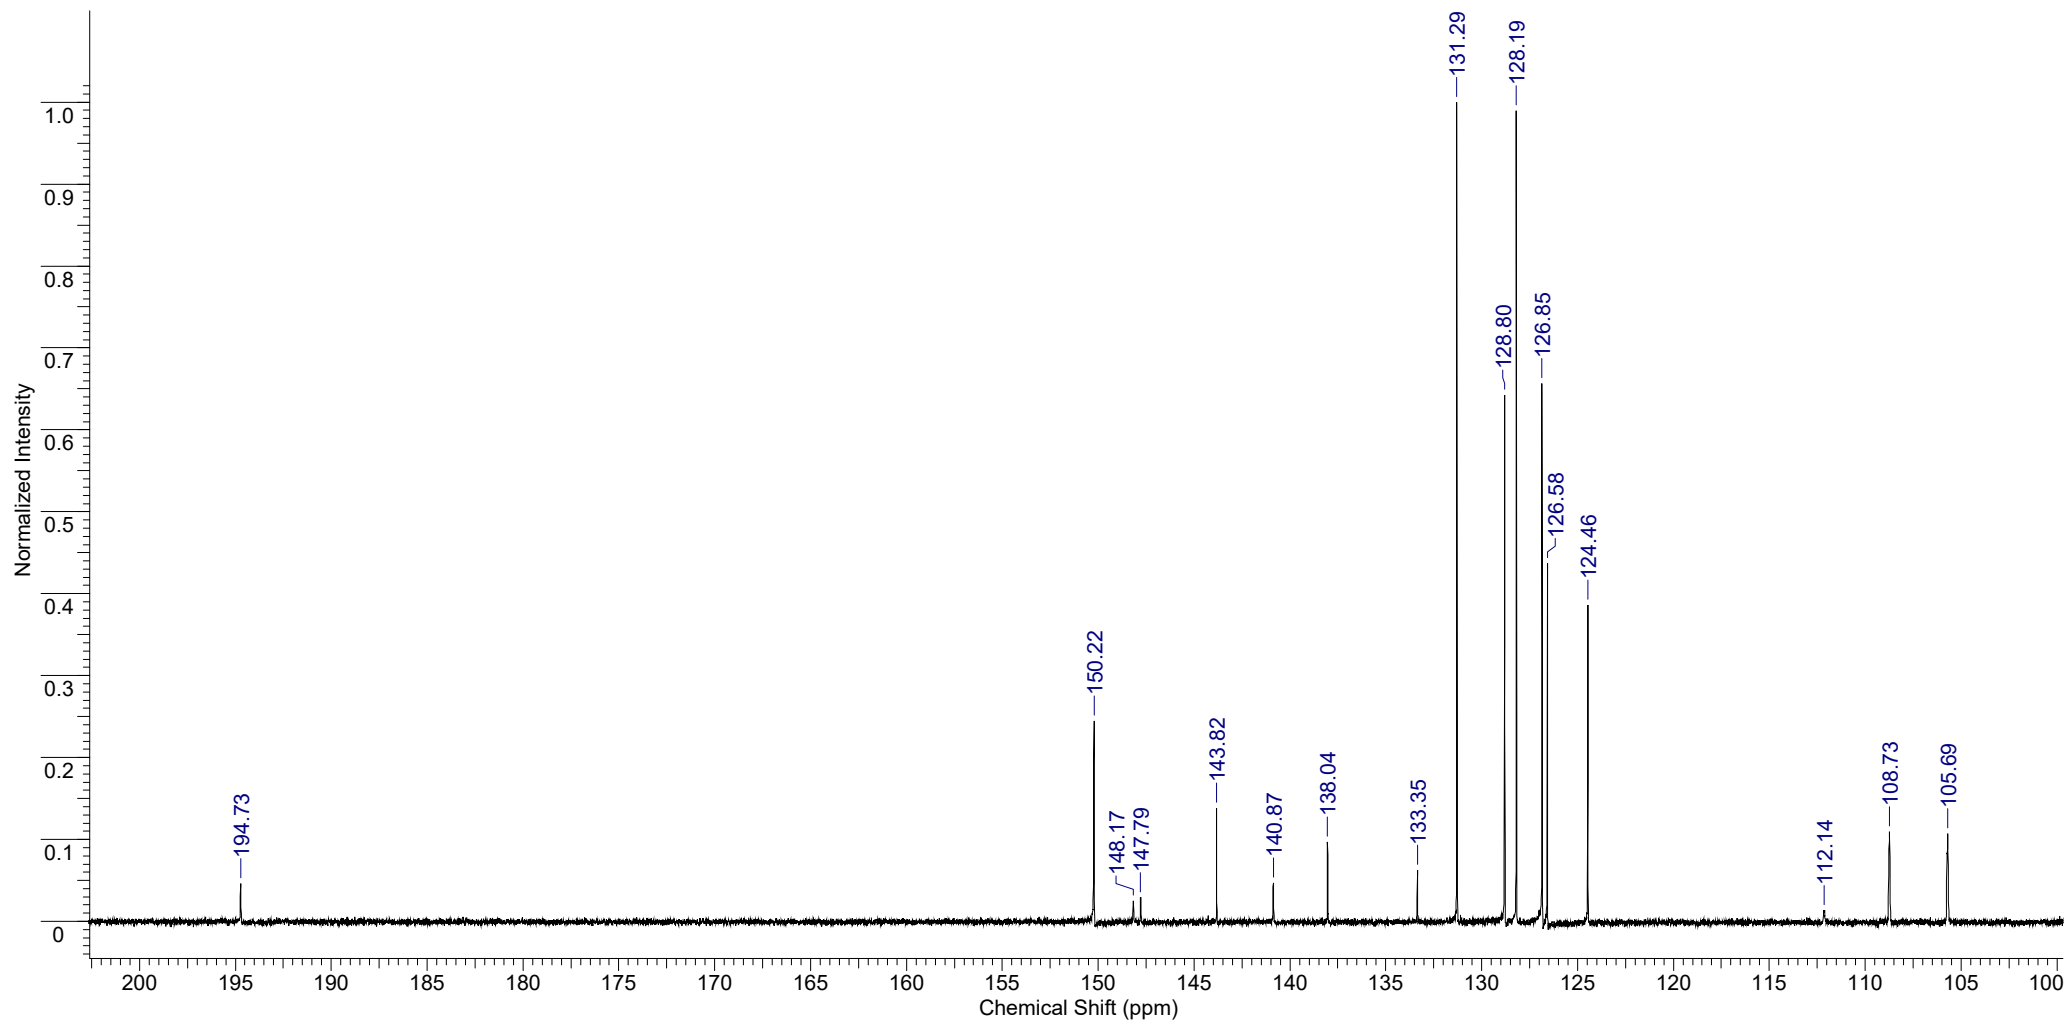



<sup>13</sup>C NMR spectra for 2l.

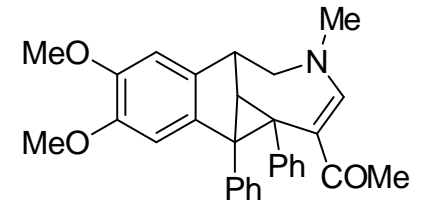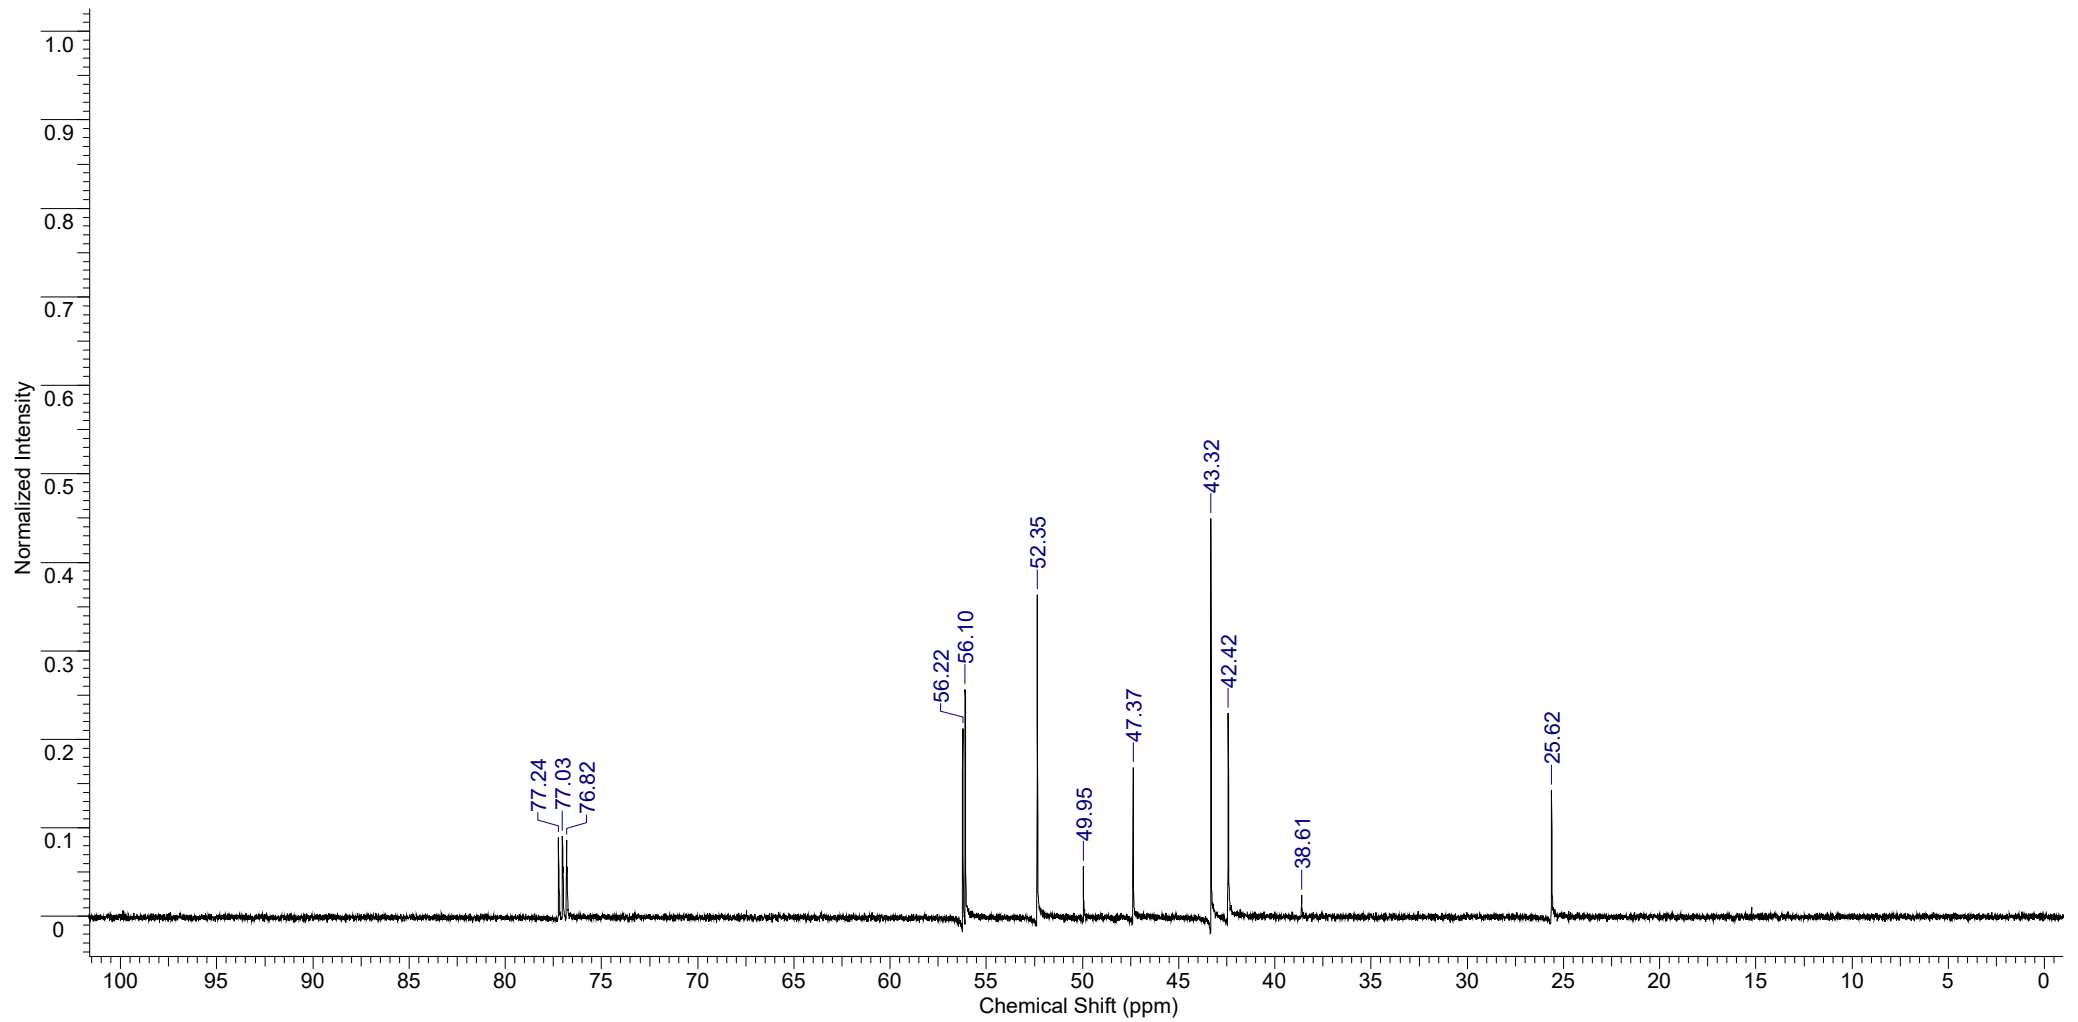

Methyl 4b-(4-fluorophenyl)-6,7-dimethoxy-2-methyl-4a-phenyl-1,2,4a,4b,8b,8c-hexahydro-2-azabenzocyclopropa[cd]azulene-4-carboxylate (2m)

$^1\text{H}$  NMR spectra for 2m.

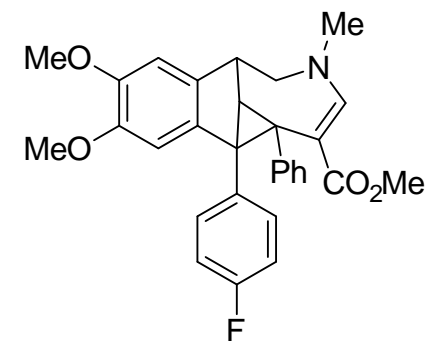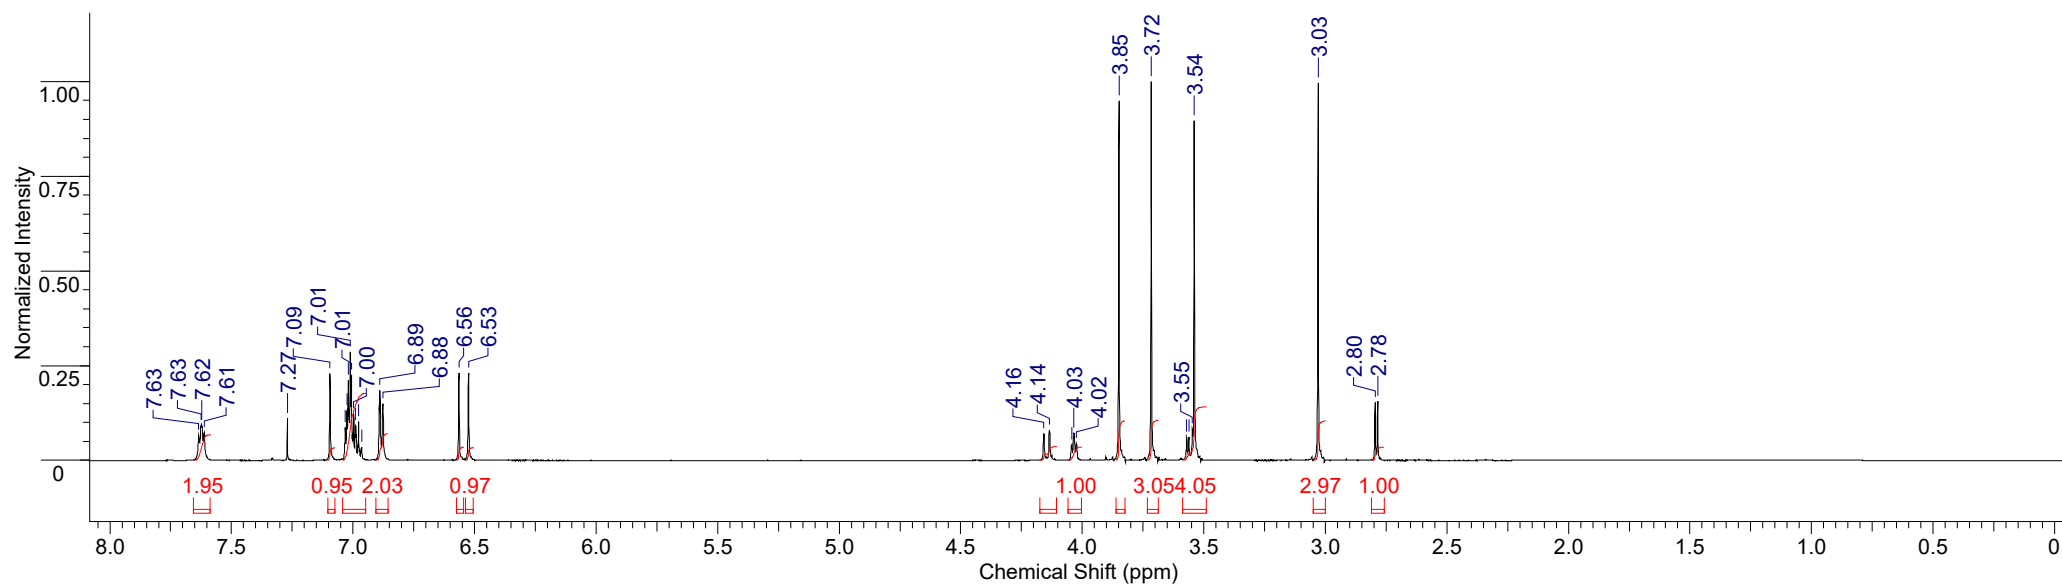

<sup>1</sup>H NMR spectra for 2m.

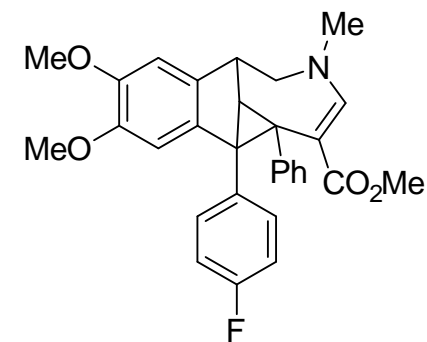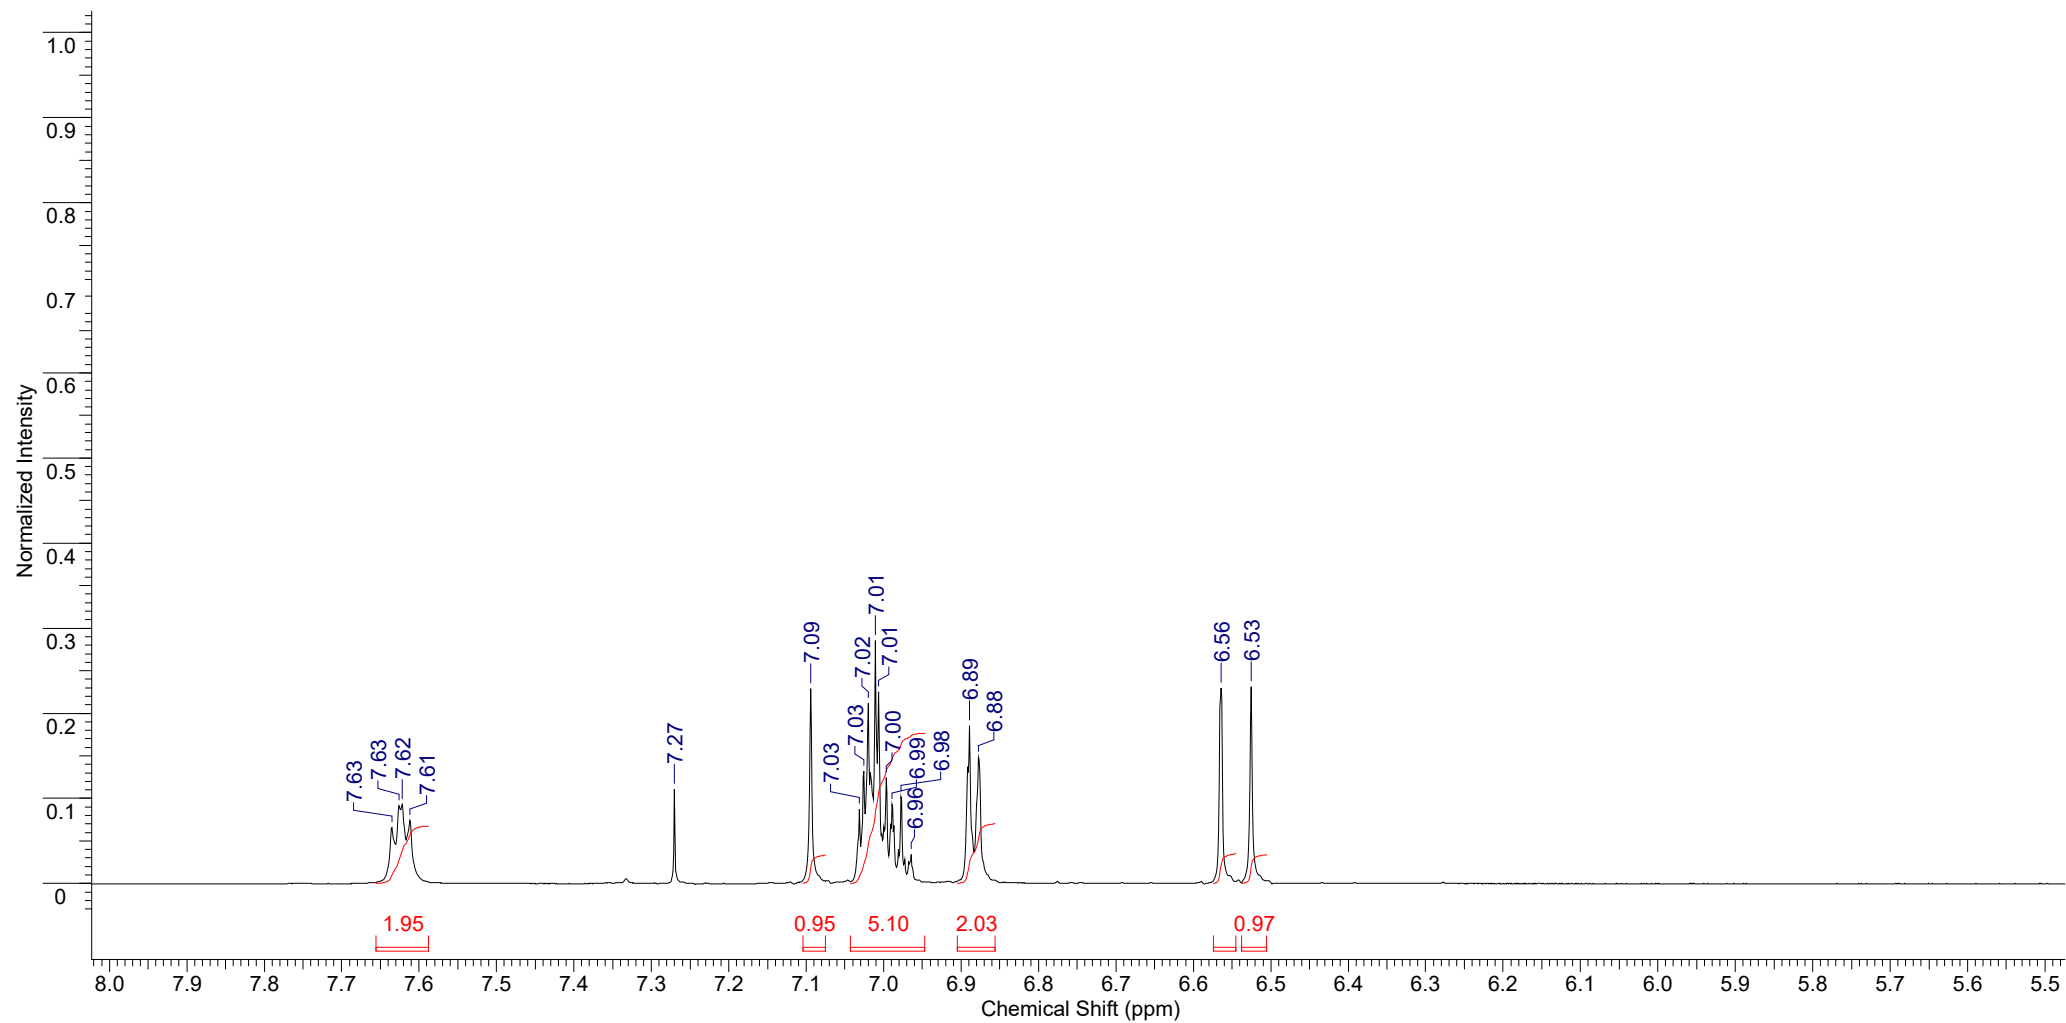

<sup>1</sup>H NMR spectra for 2m.

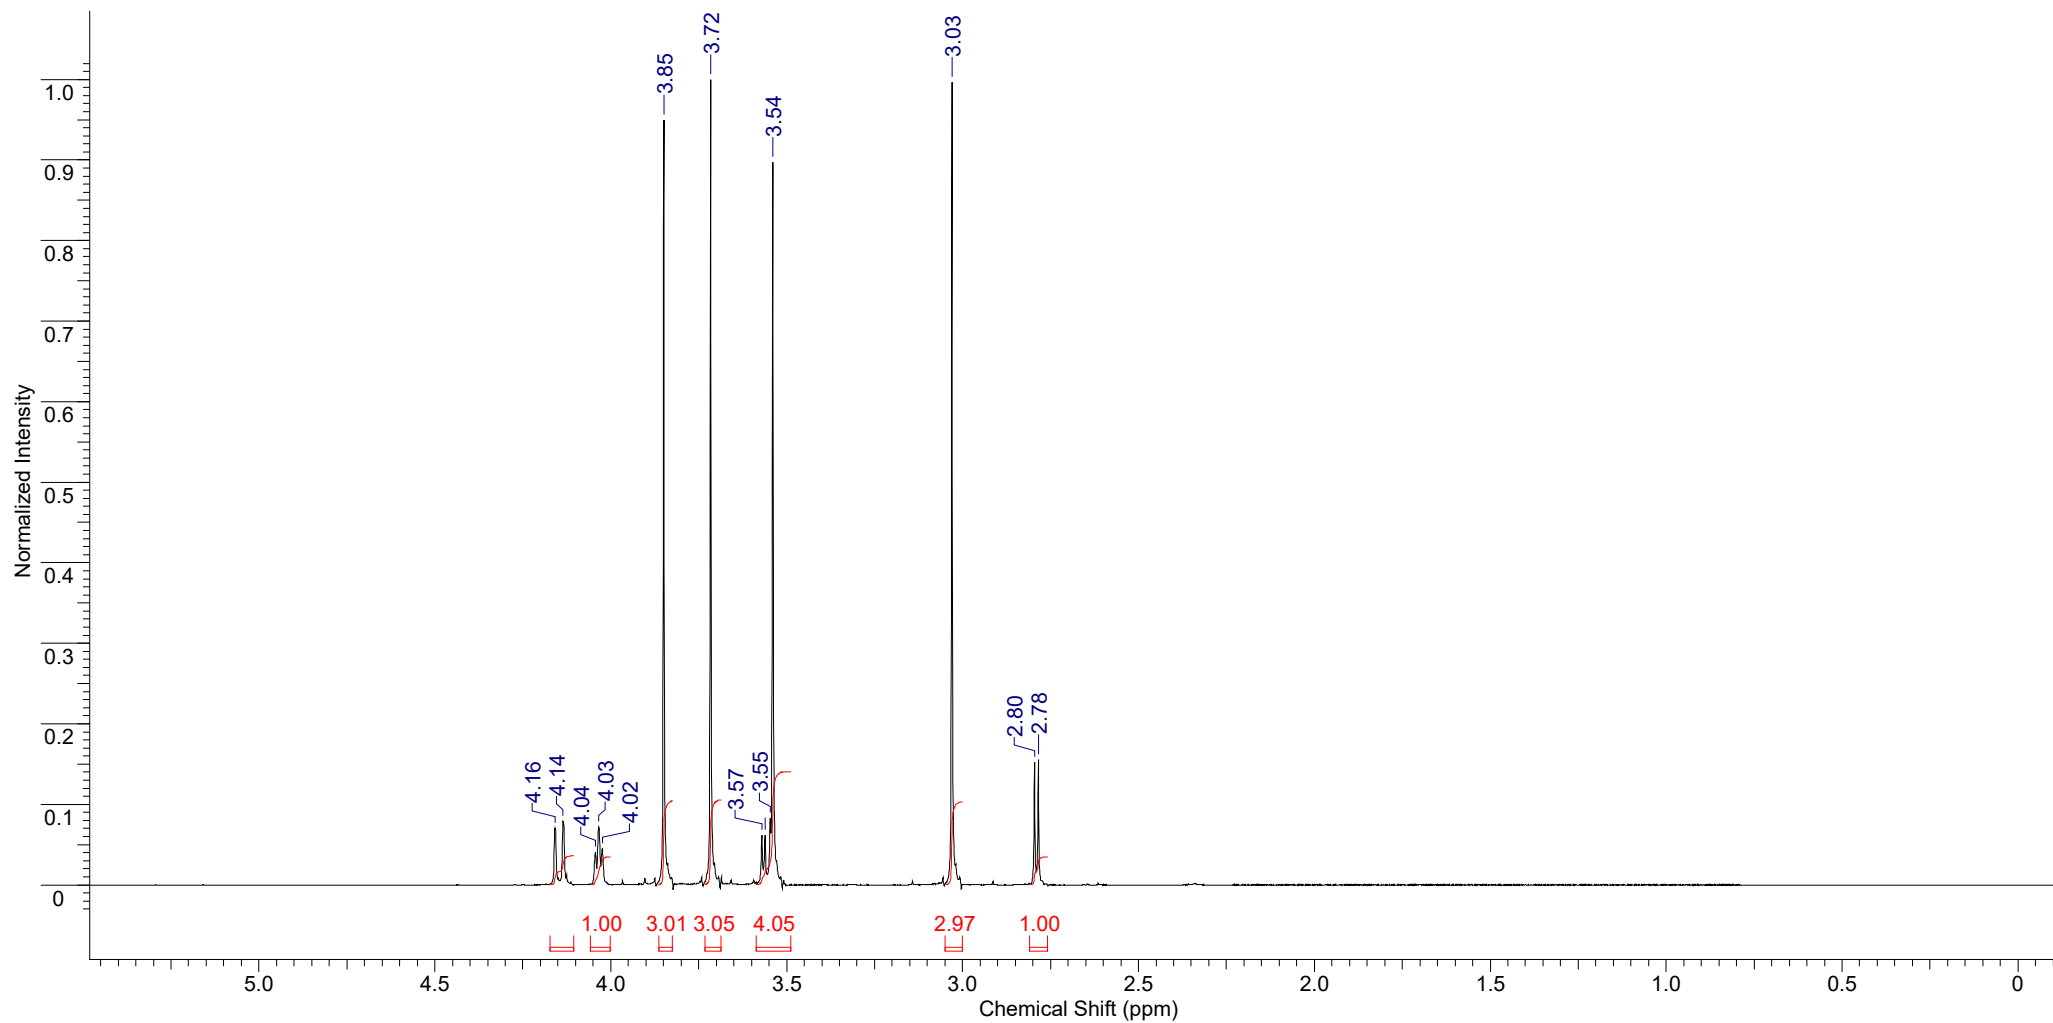

<sup>13</sup>C NMR spectra for 2m.

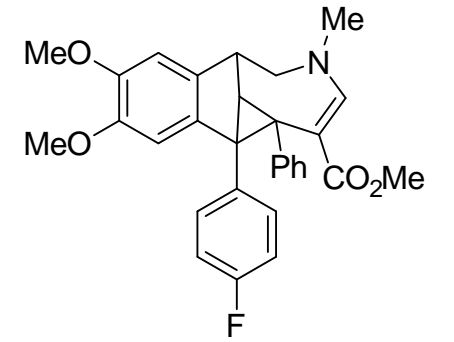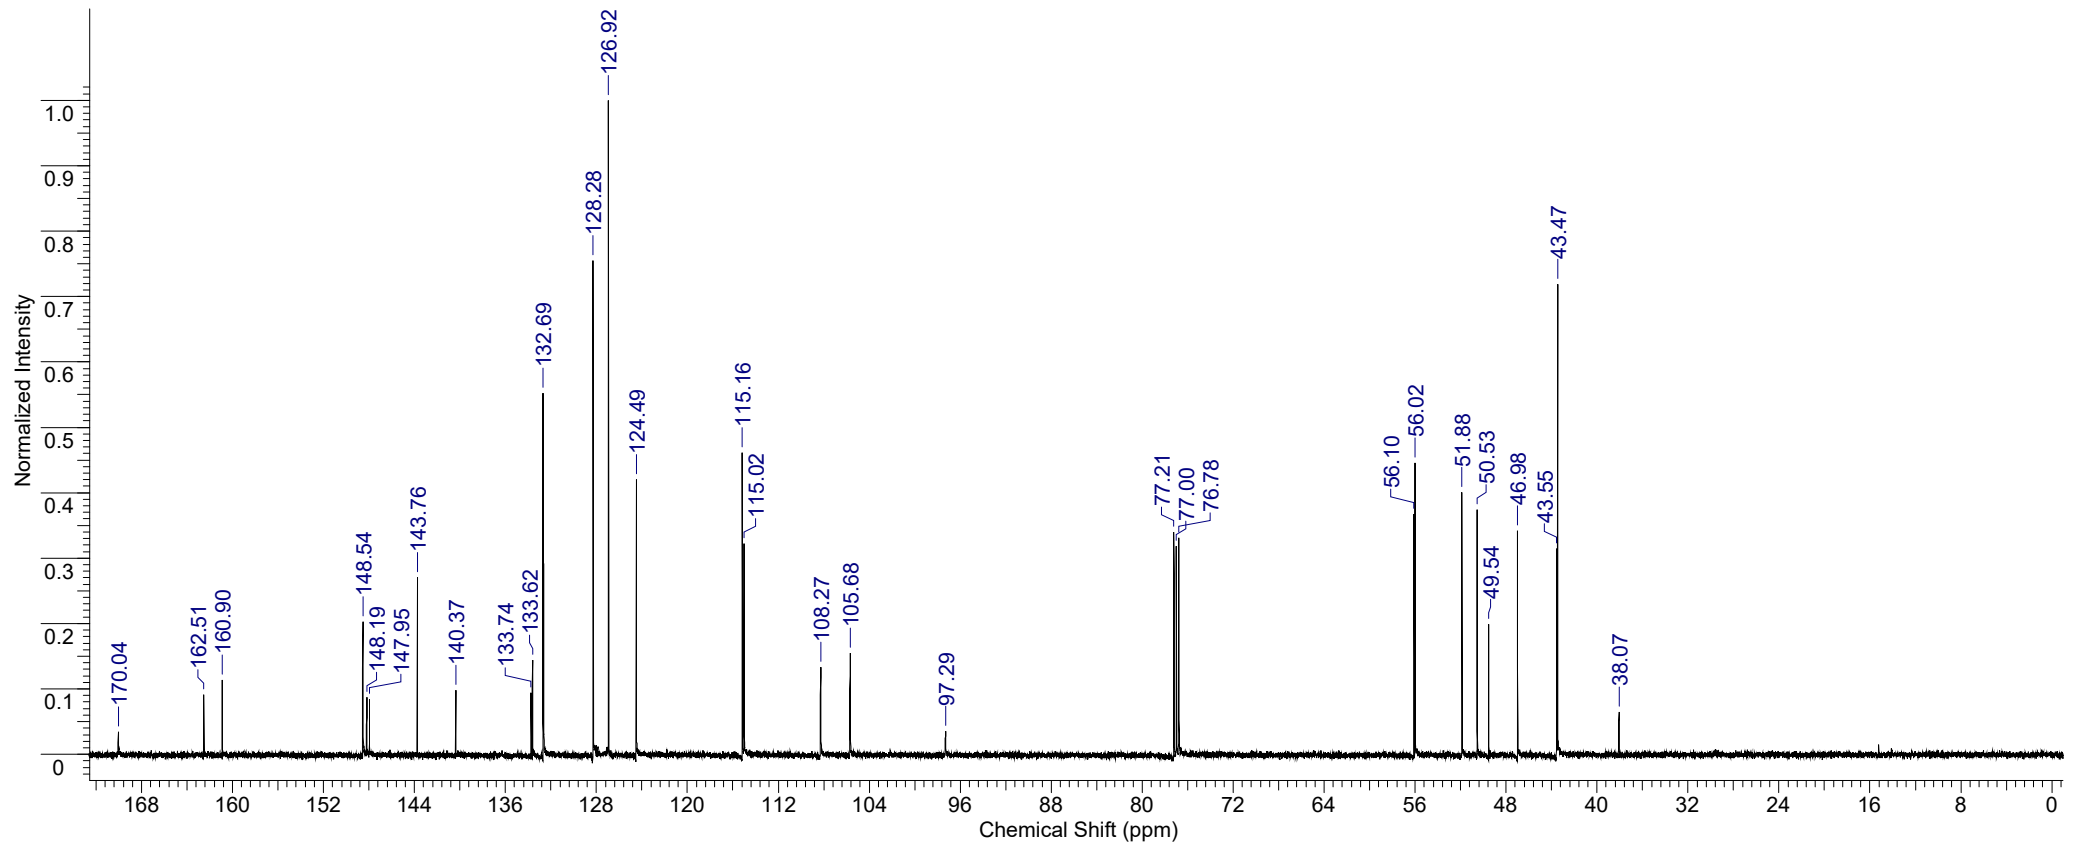

<sup>13</sup>C NMR spectra for 2m.

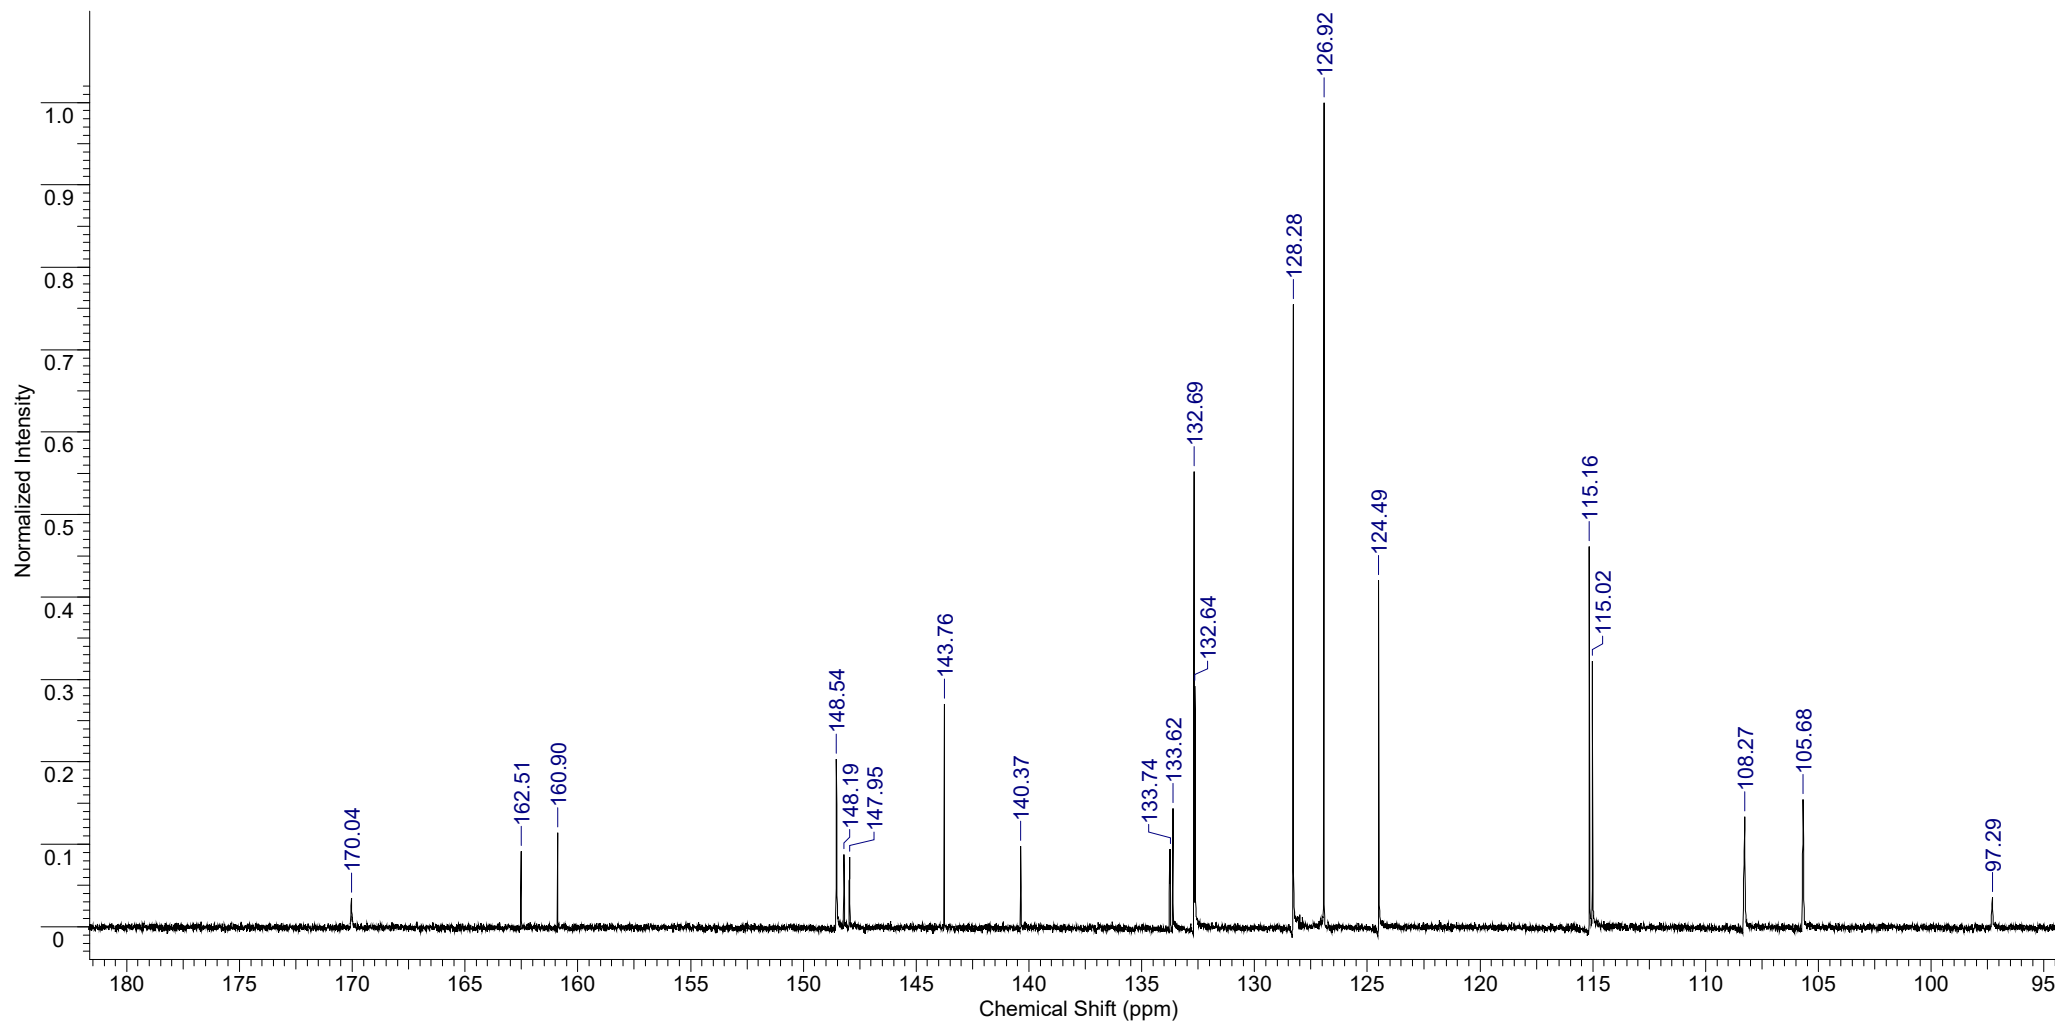

<sup>13</sup>C NMR spectra for 2m.

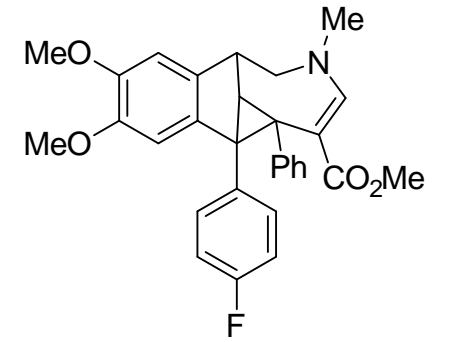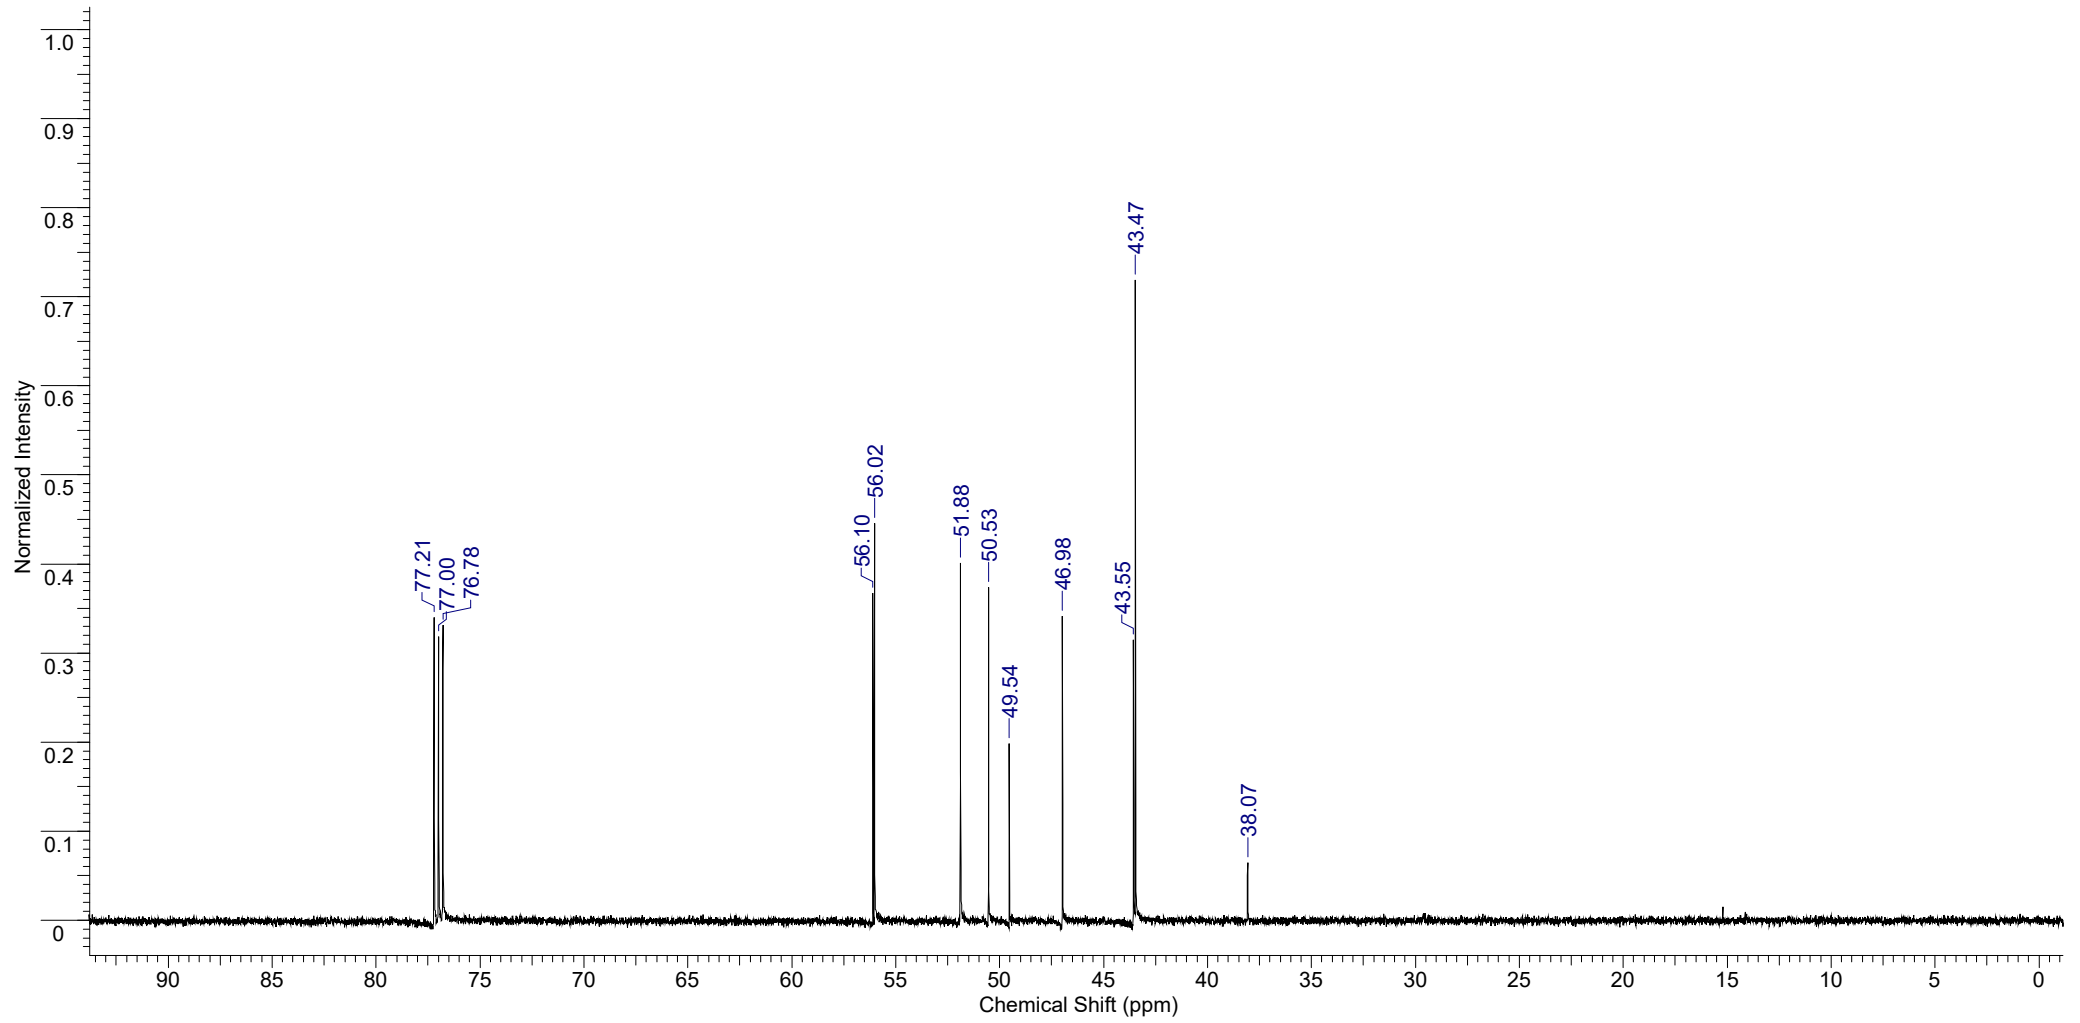

**<sup>19</sup>F NMR spectra for 2m.**

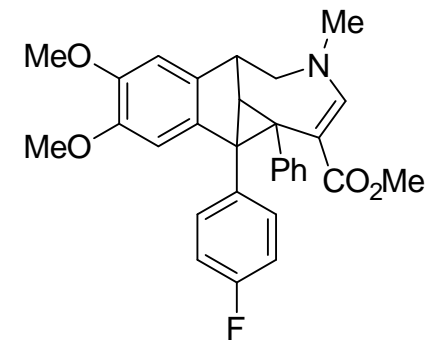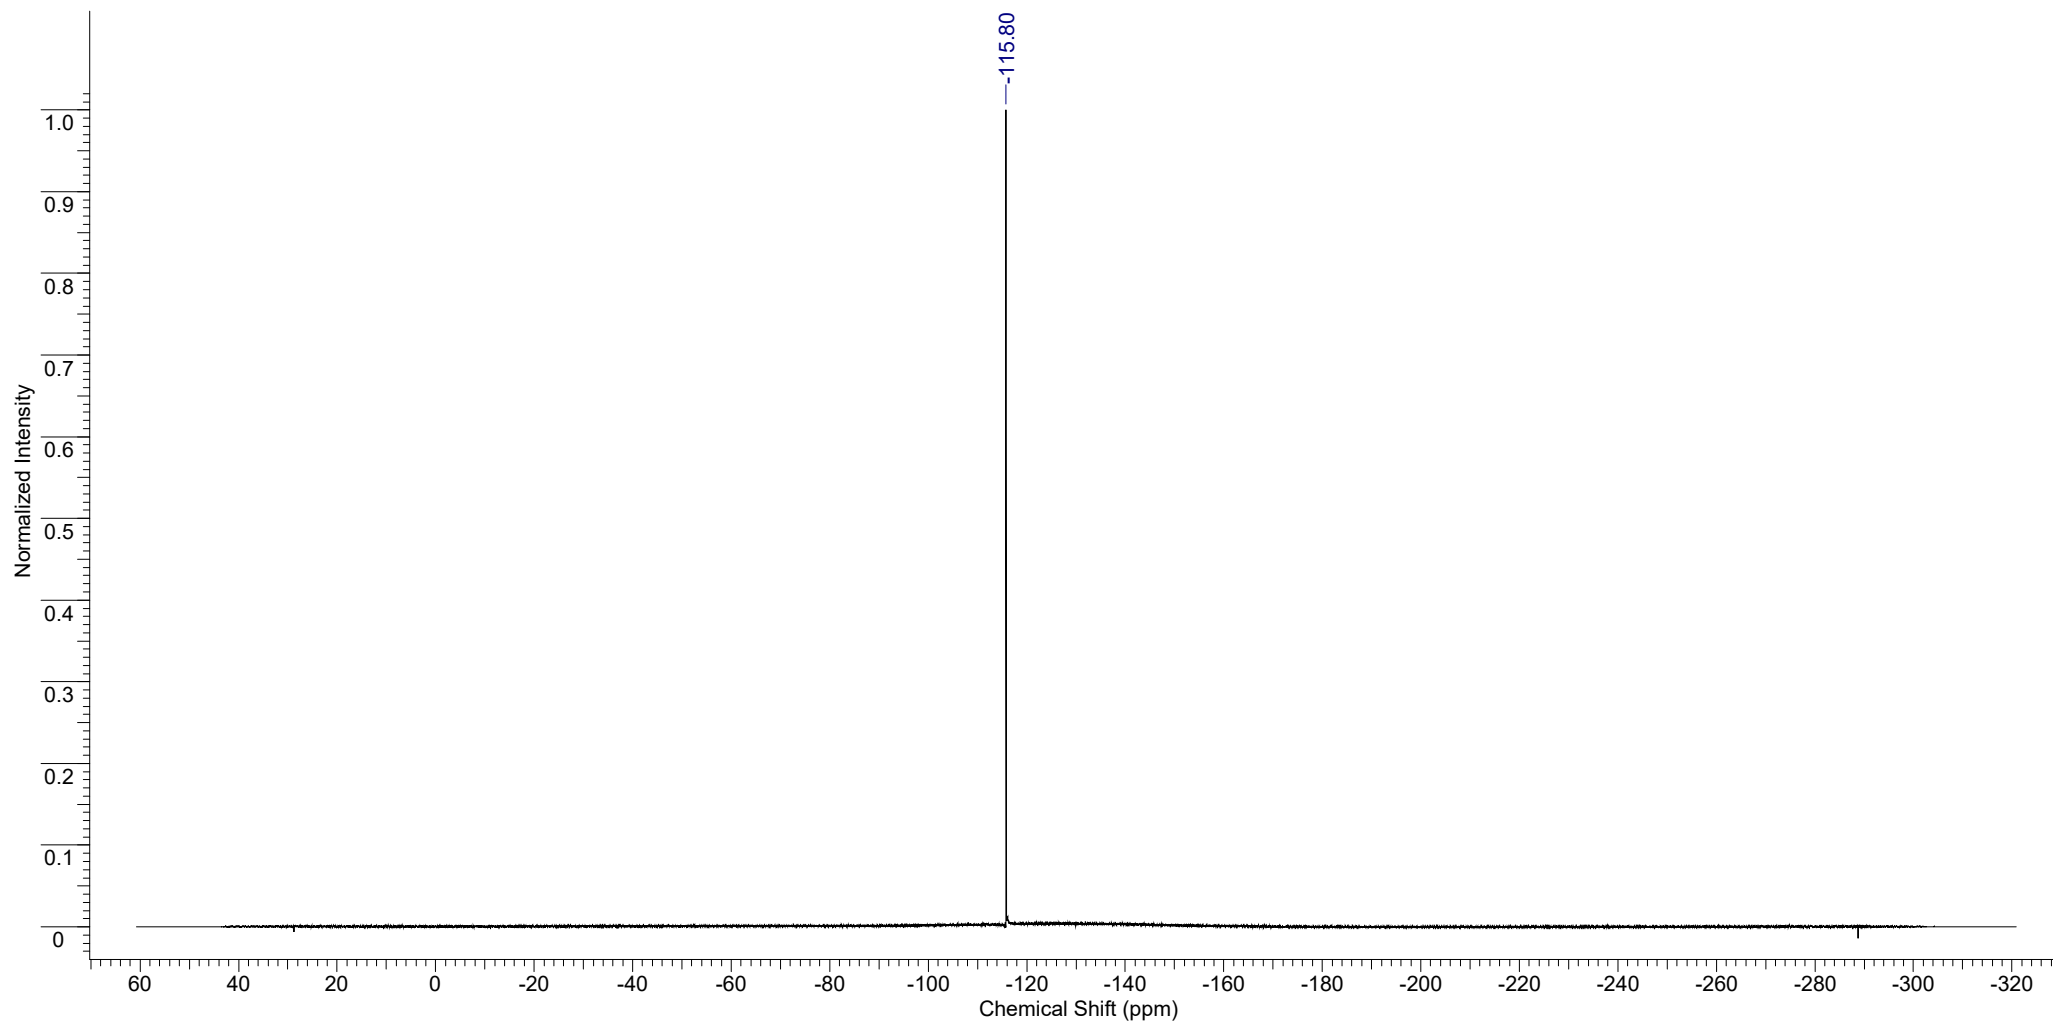



1-[4b-(4-Fluorophenyl)-6,7-dimethoxy-2-methyl-4a-phenyl-1,2,4a,4b,8b,8c-hexahydro-2-azabenzocyclopropa[cd]azulen-4-yl]ethanone (2n)

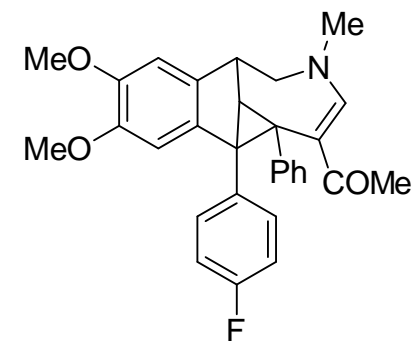

$^1\text{H}$  NMR spectra for 2n.

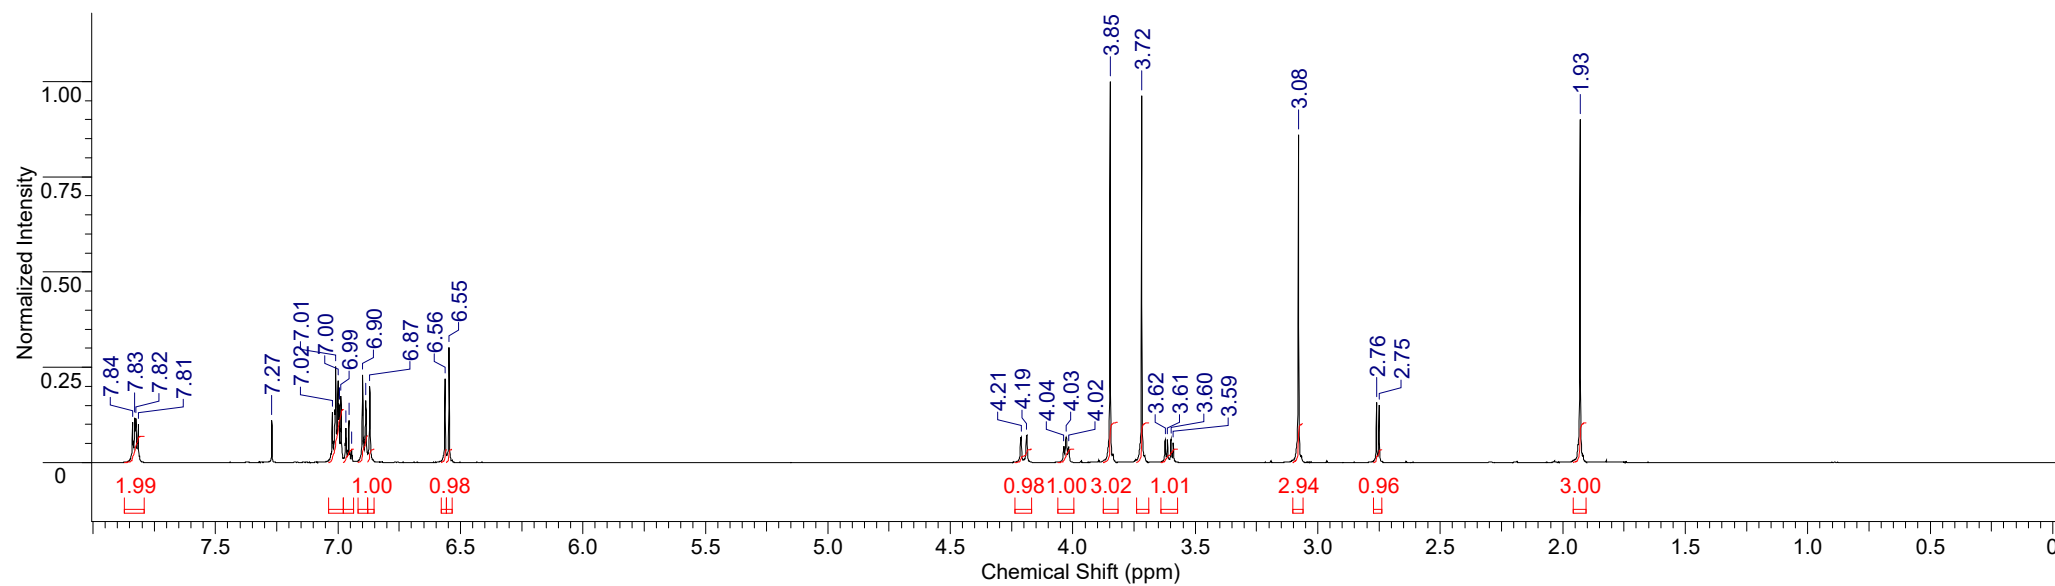

<sup>1</sup>H NMR spectra for 2n.

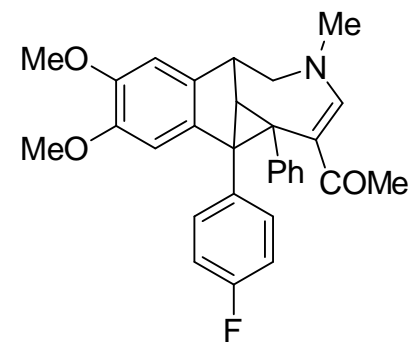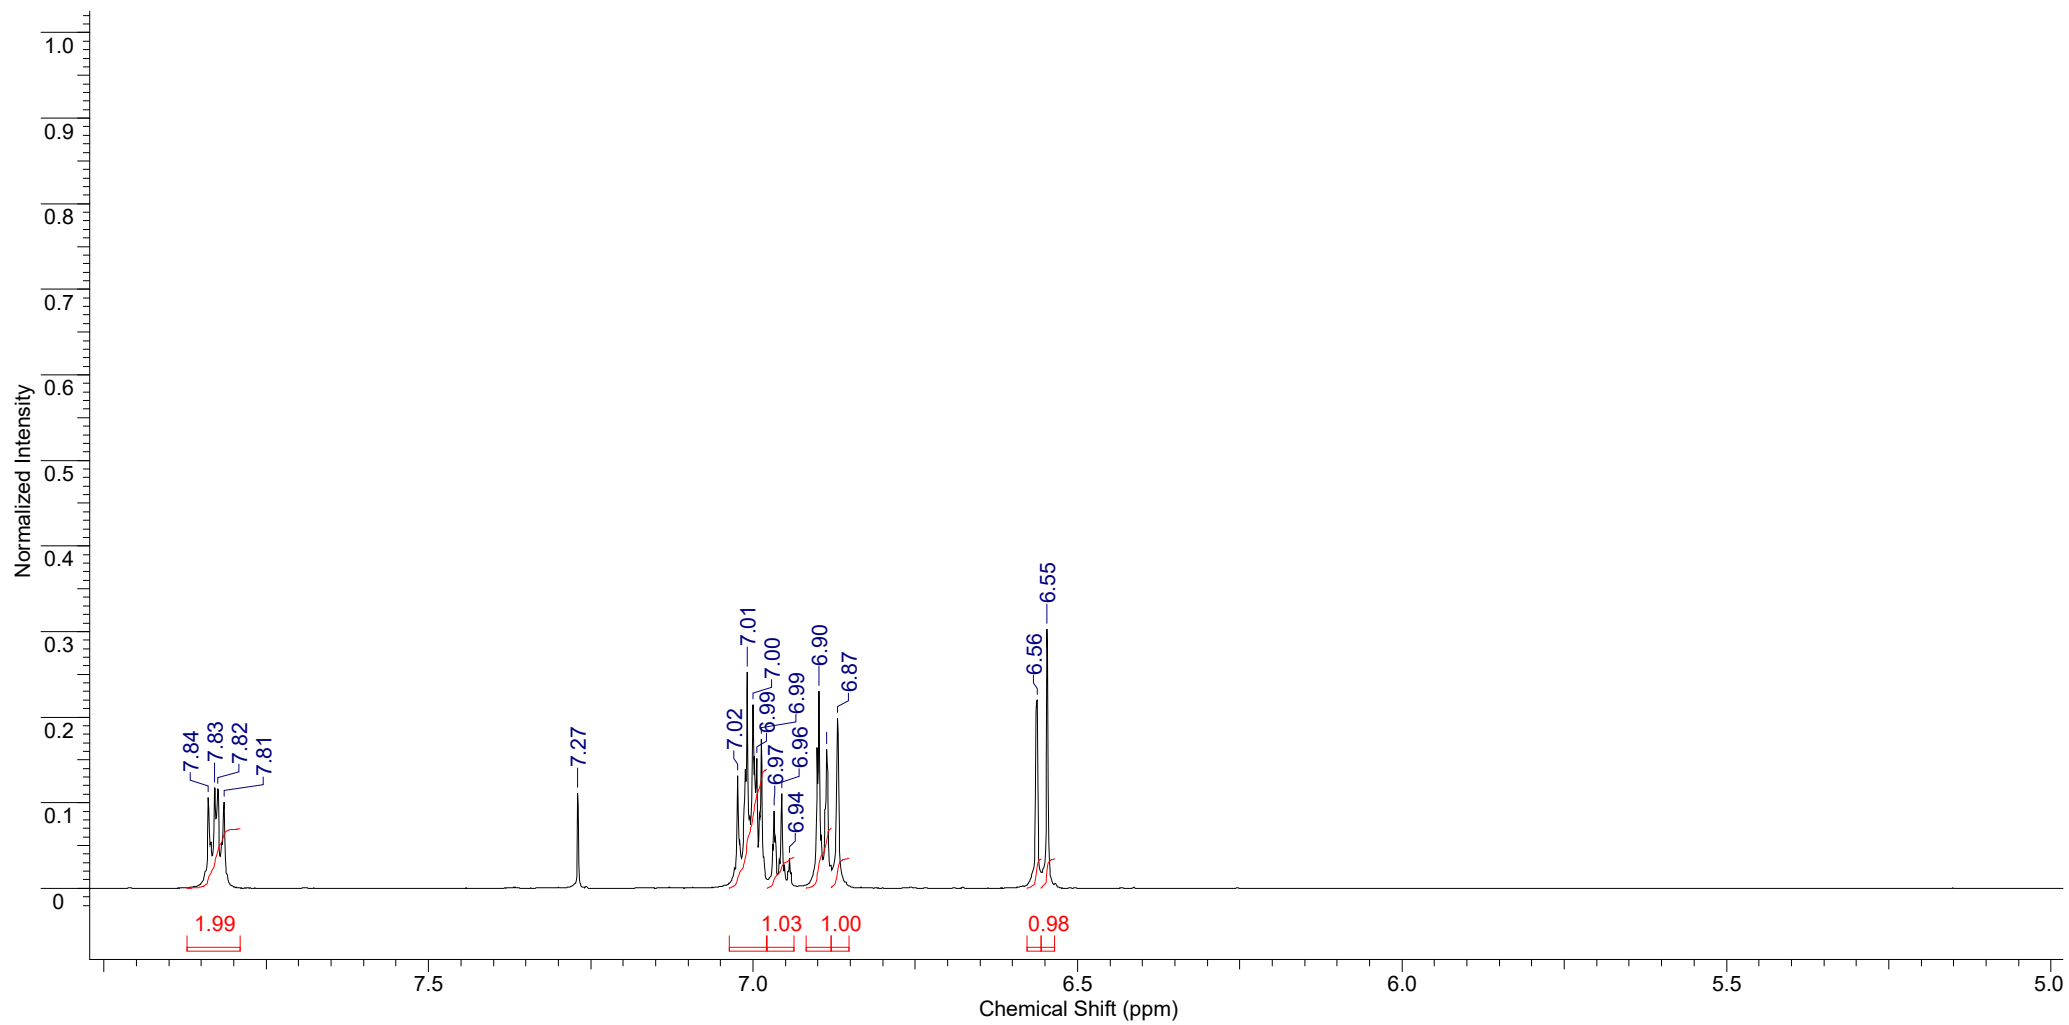

<sup>1</sup>H NMR spectra for 2n.

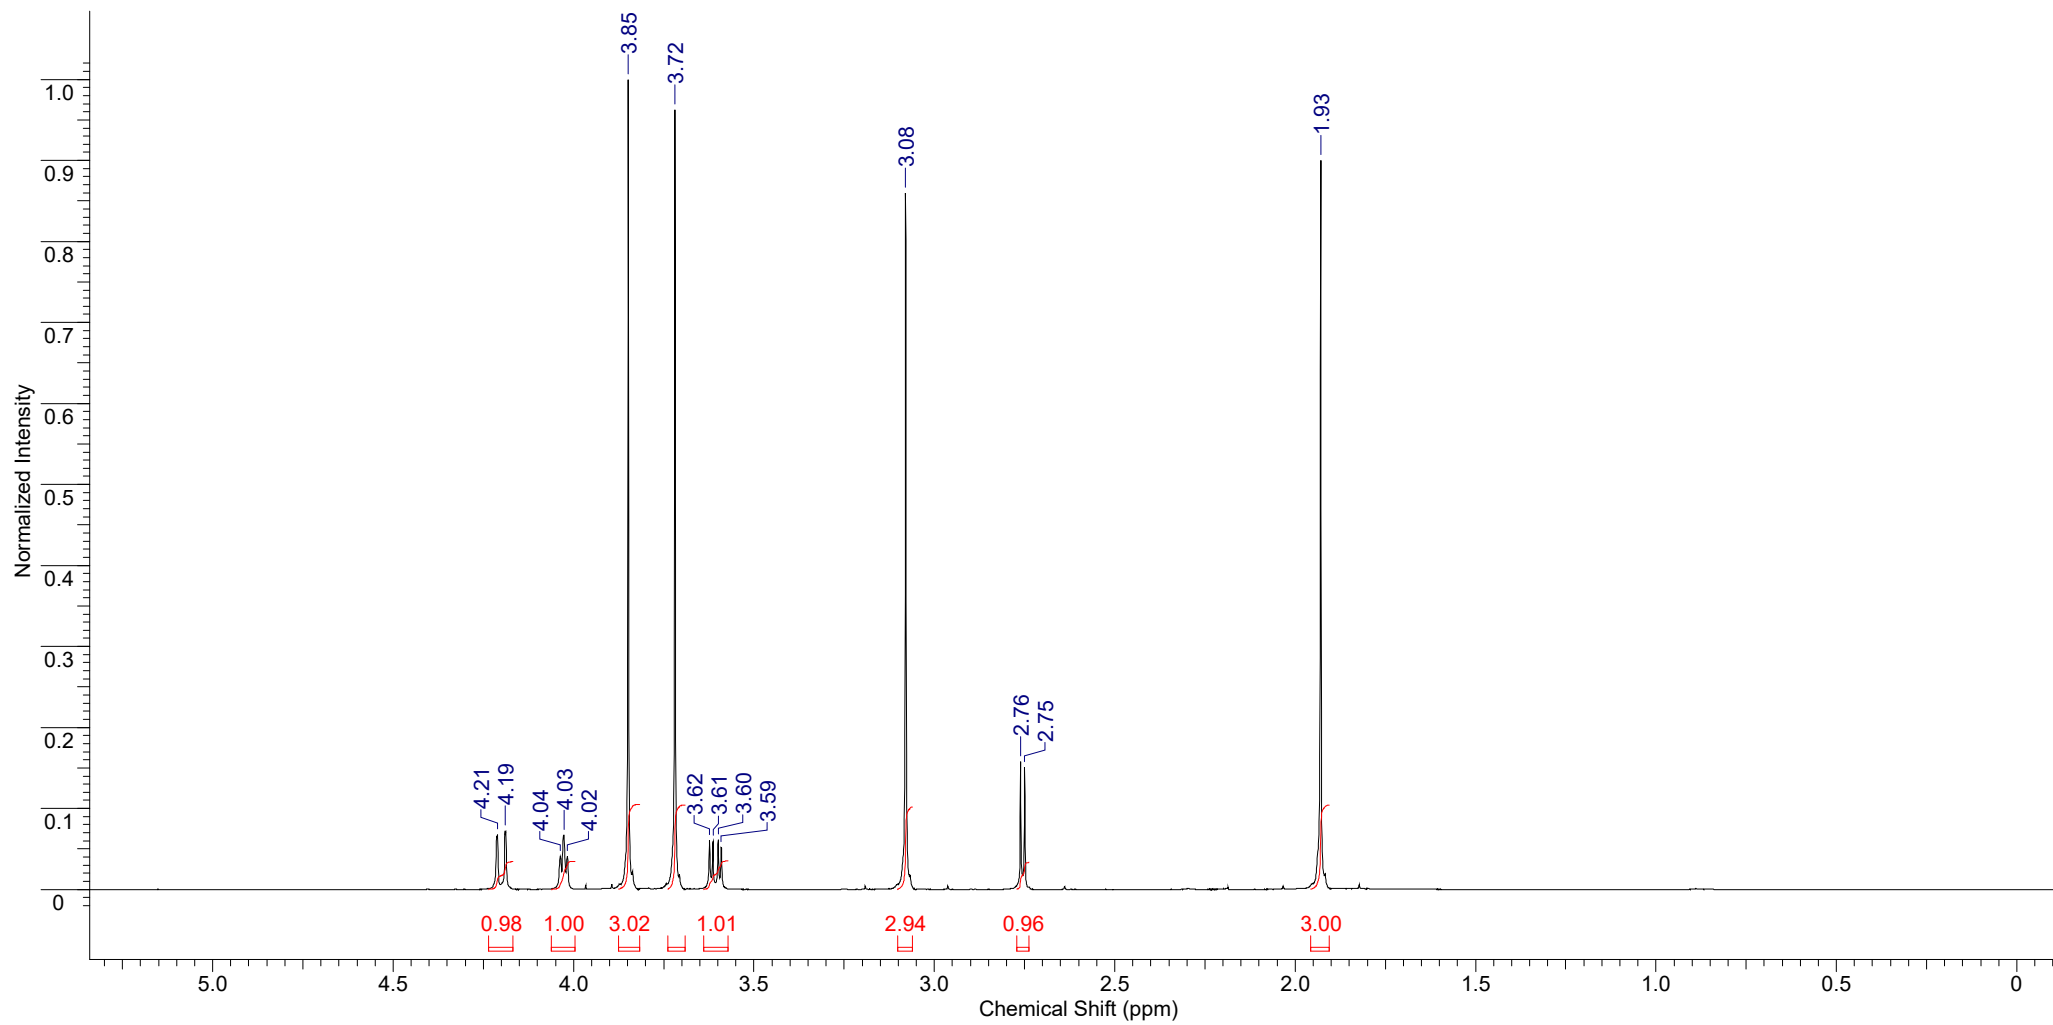

<sup>13</sup>C NMR spectra for 2n.

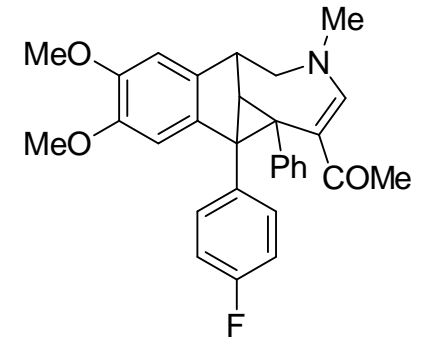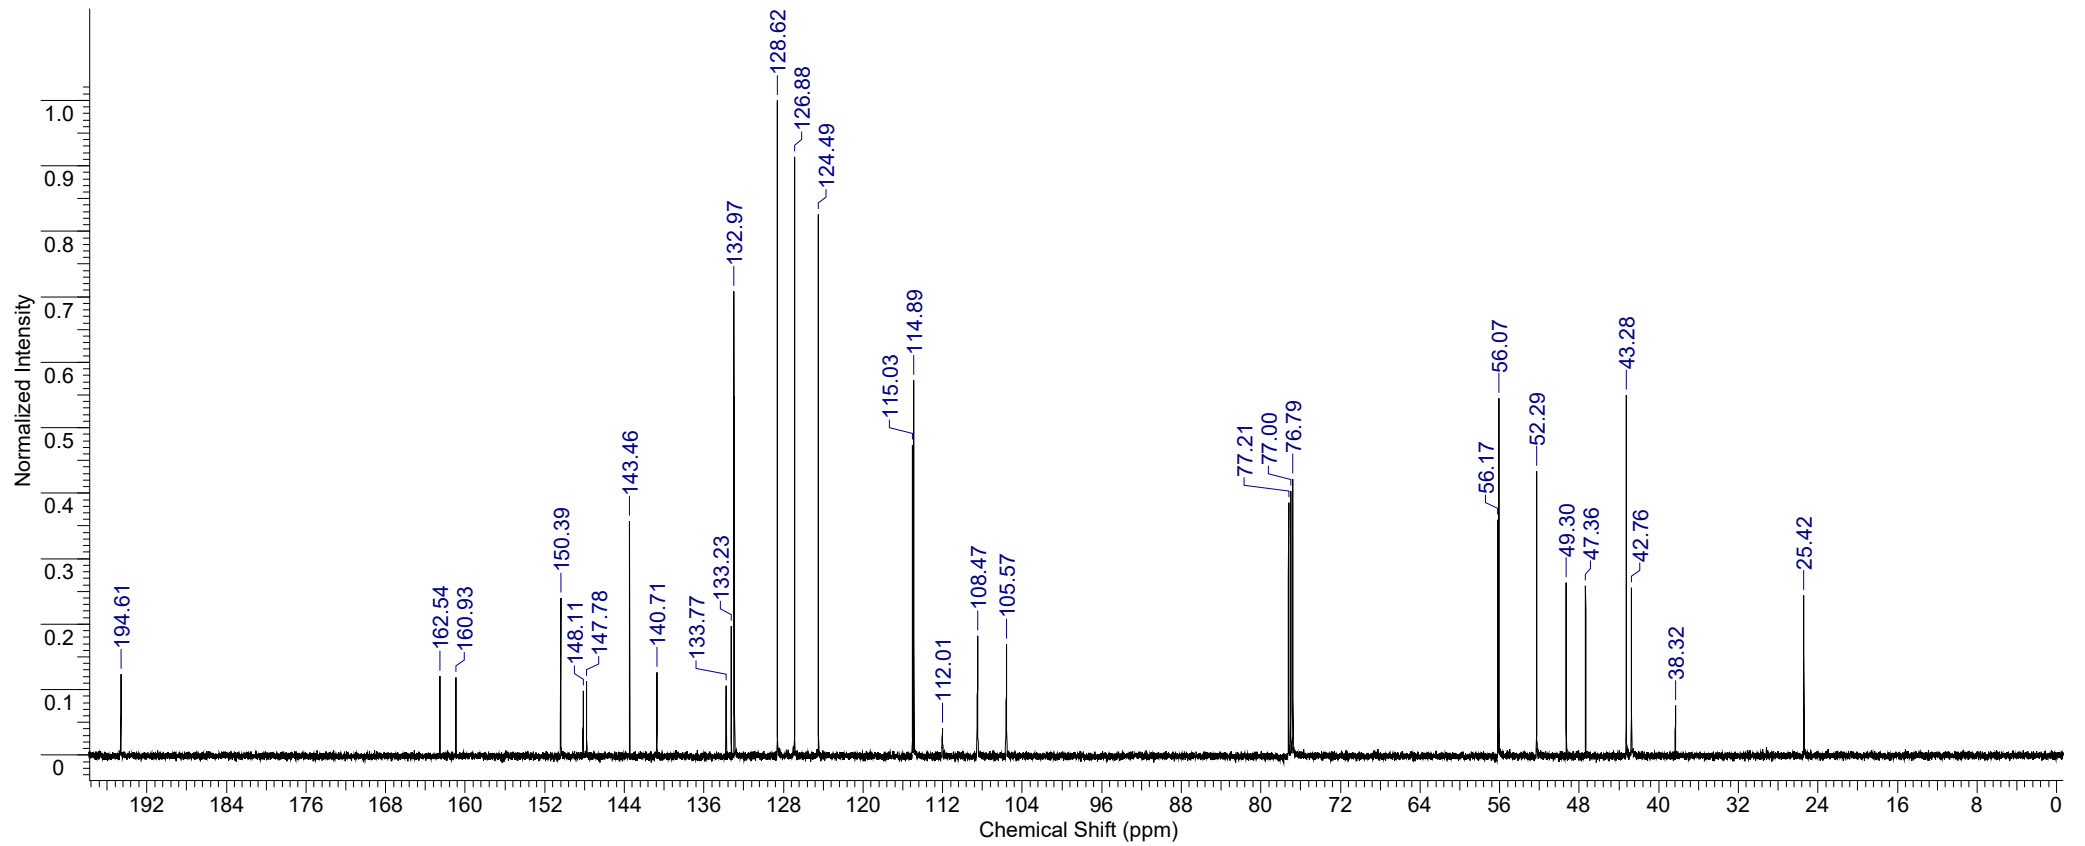

<sup>13</sup>C NMR spectra for 2n.

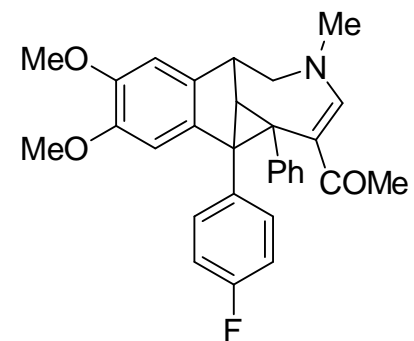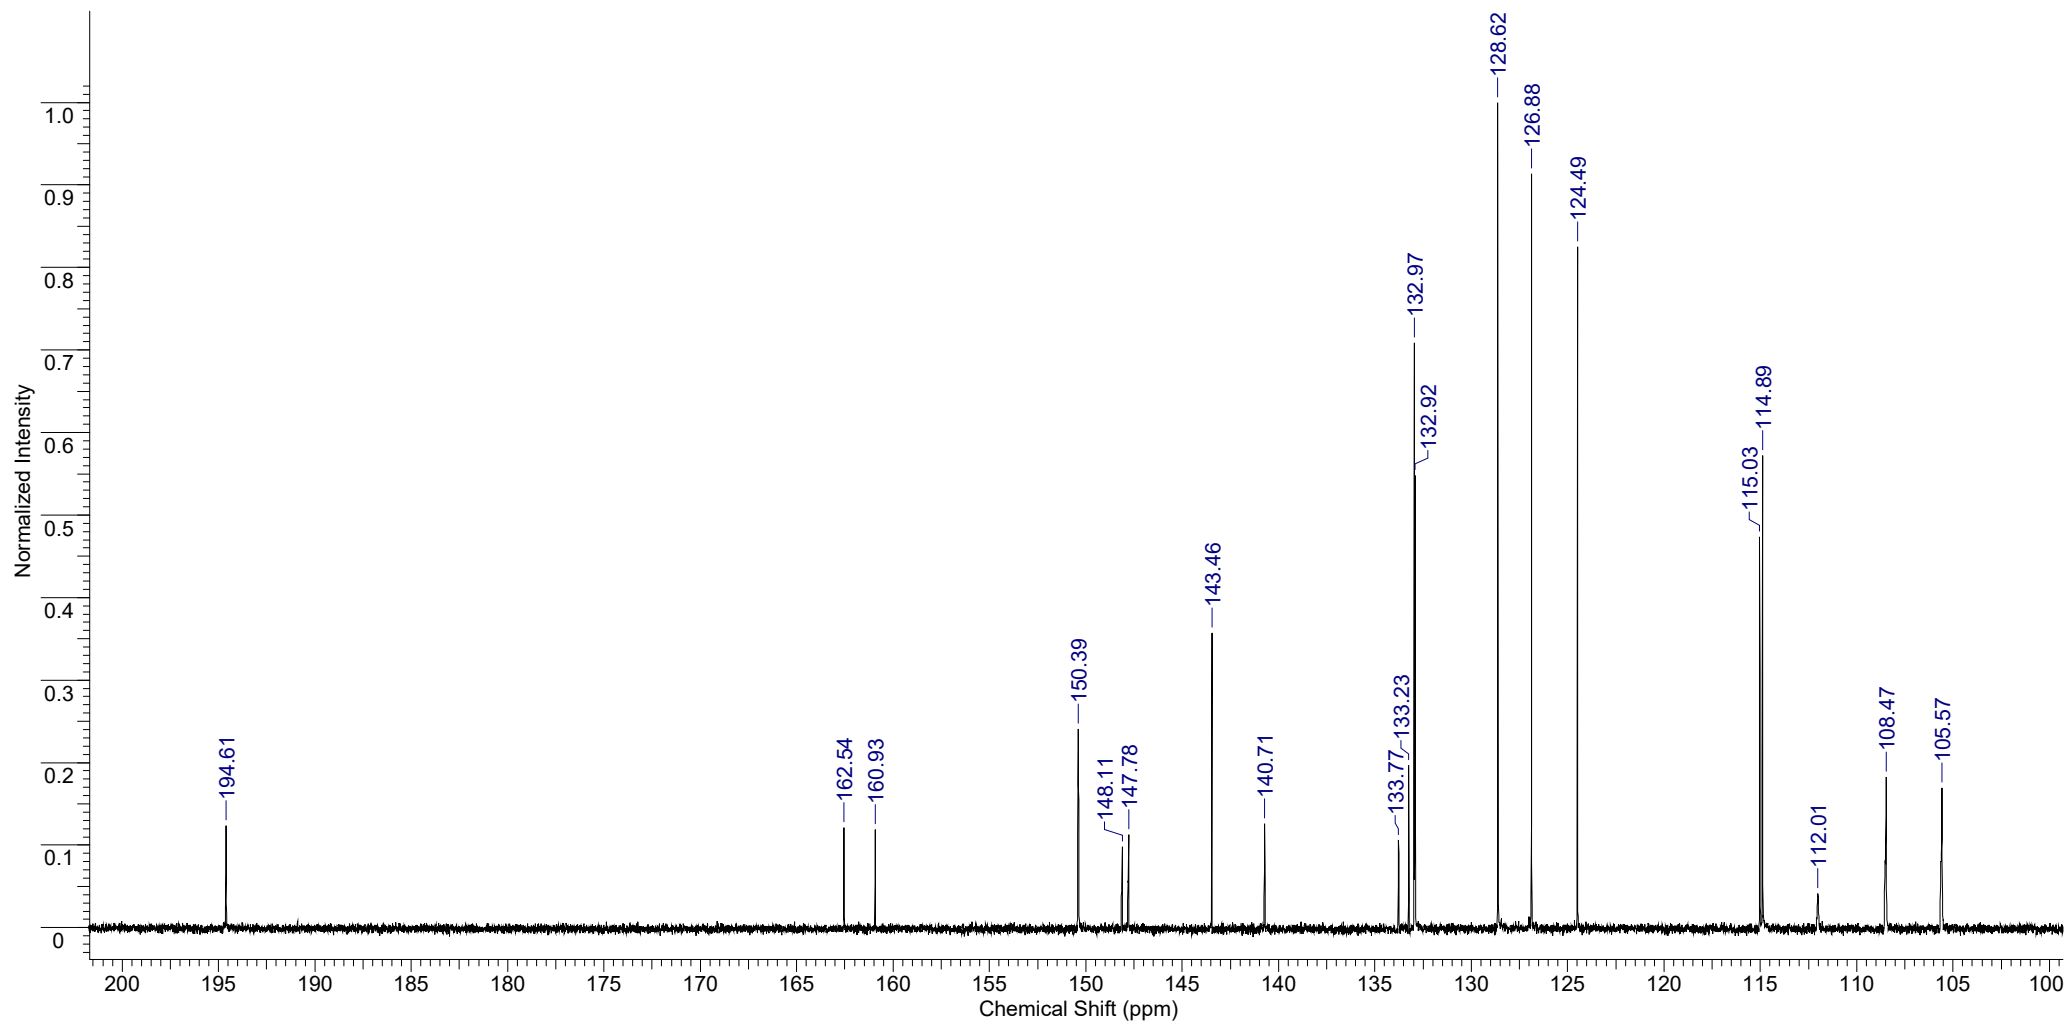

<sup>13</sup>C NMR spectra for 2n.

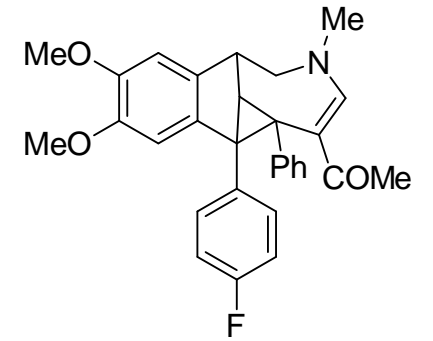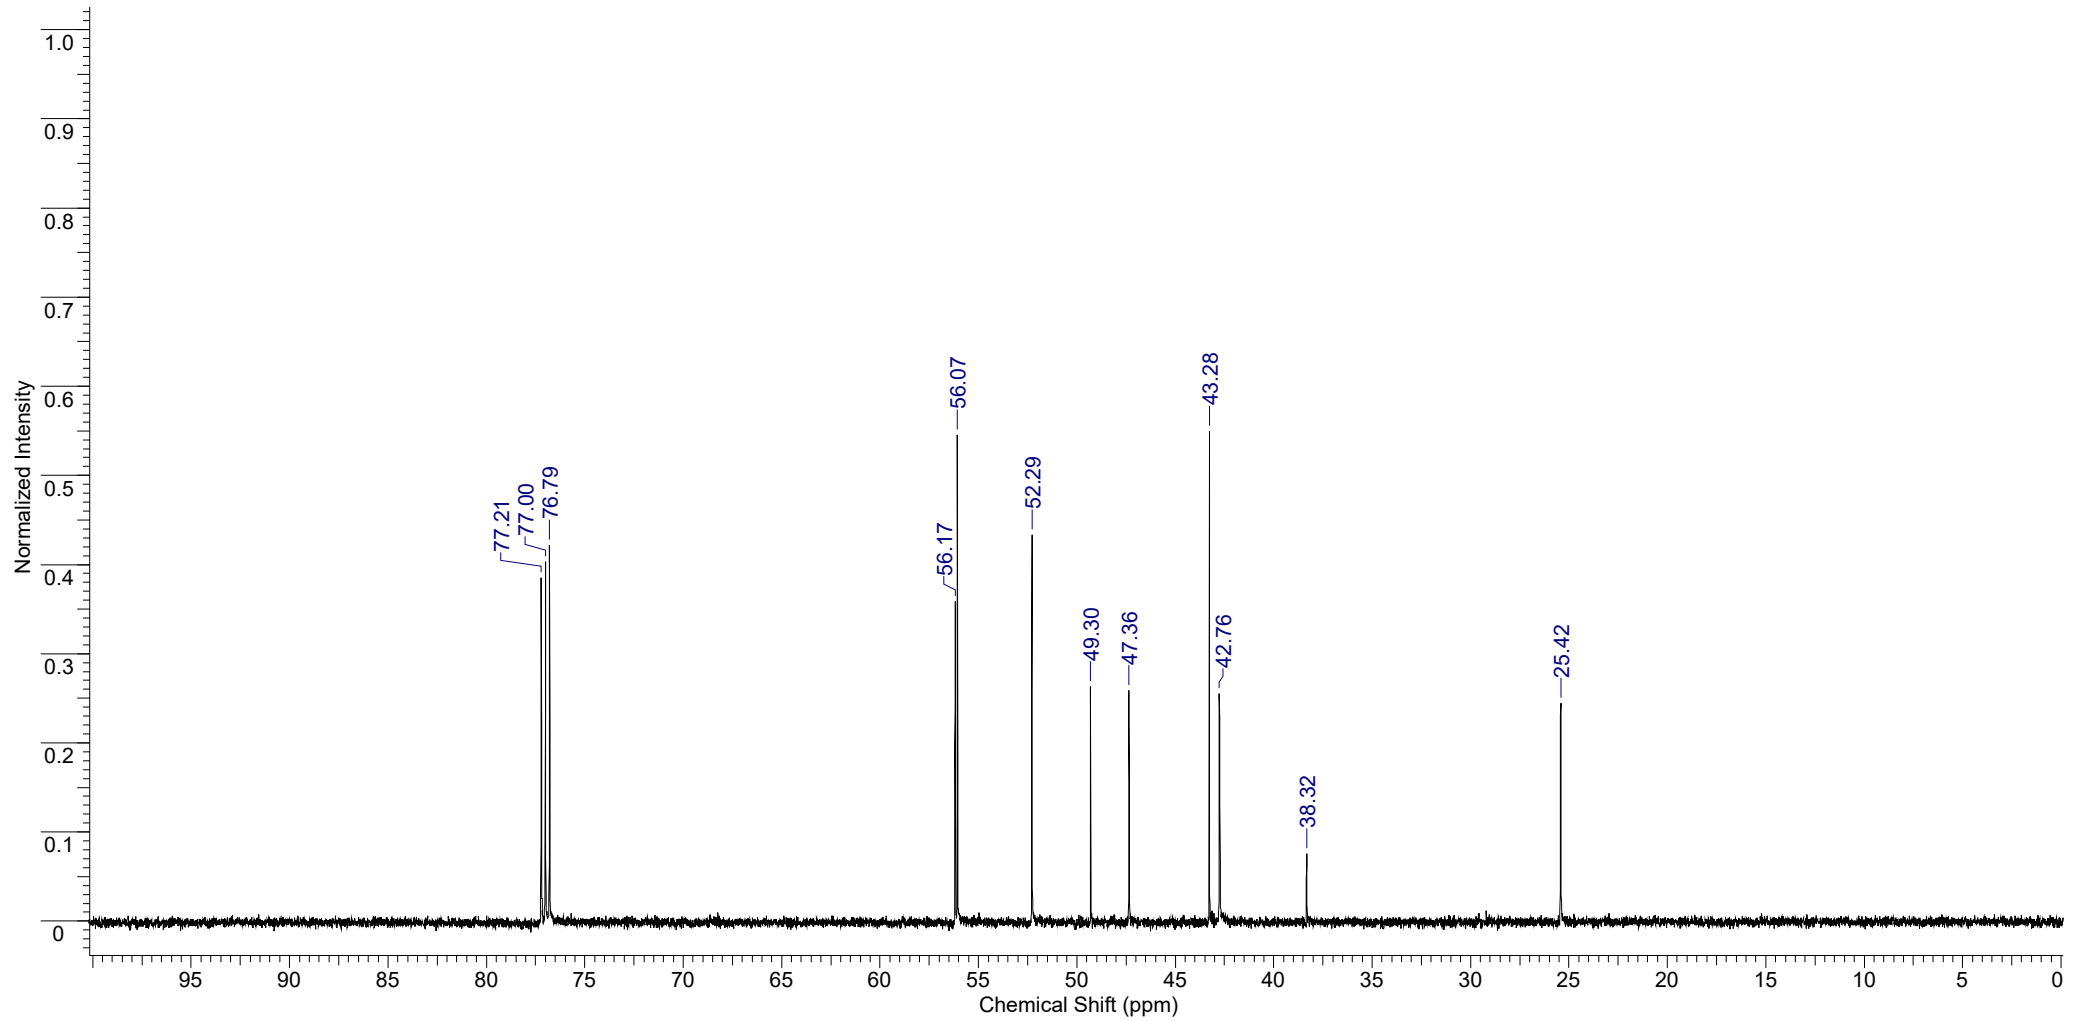

<sup>19</sup>F NMR spectra for 2n.

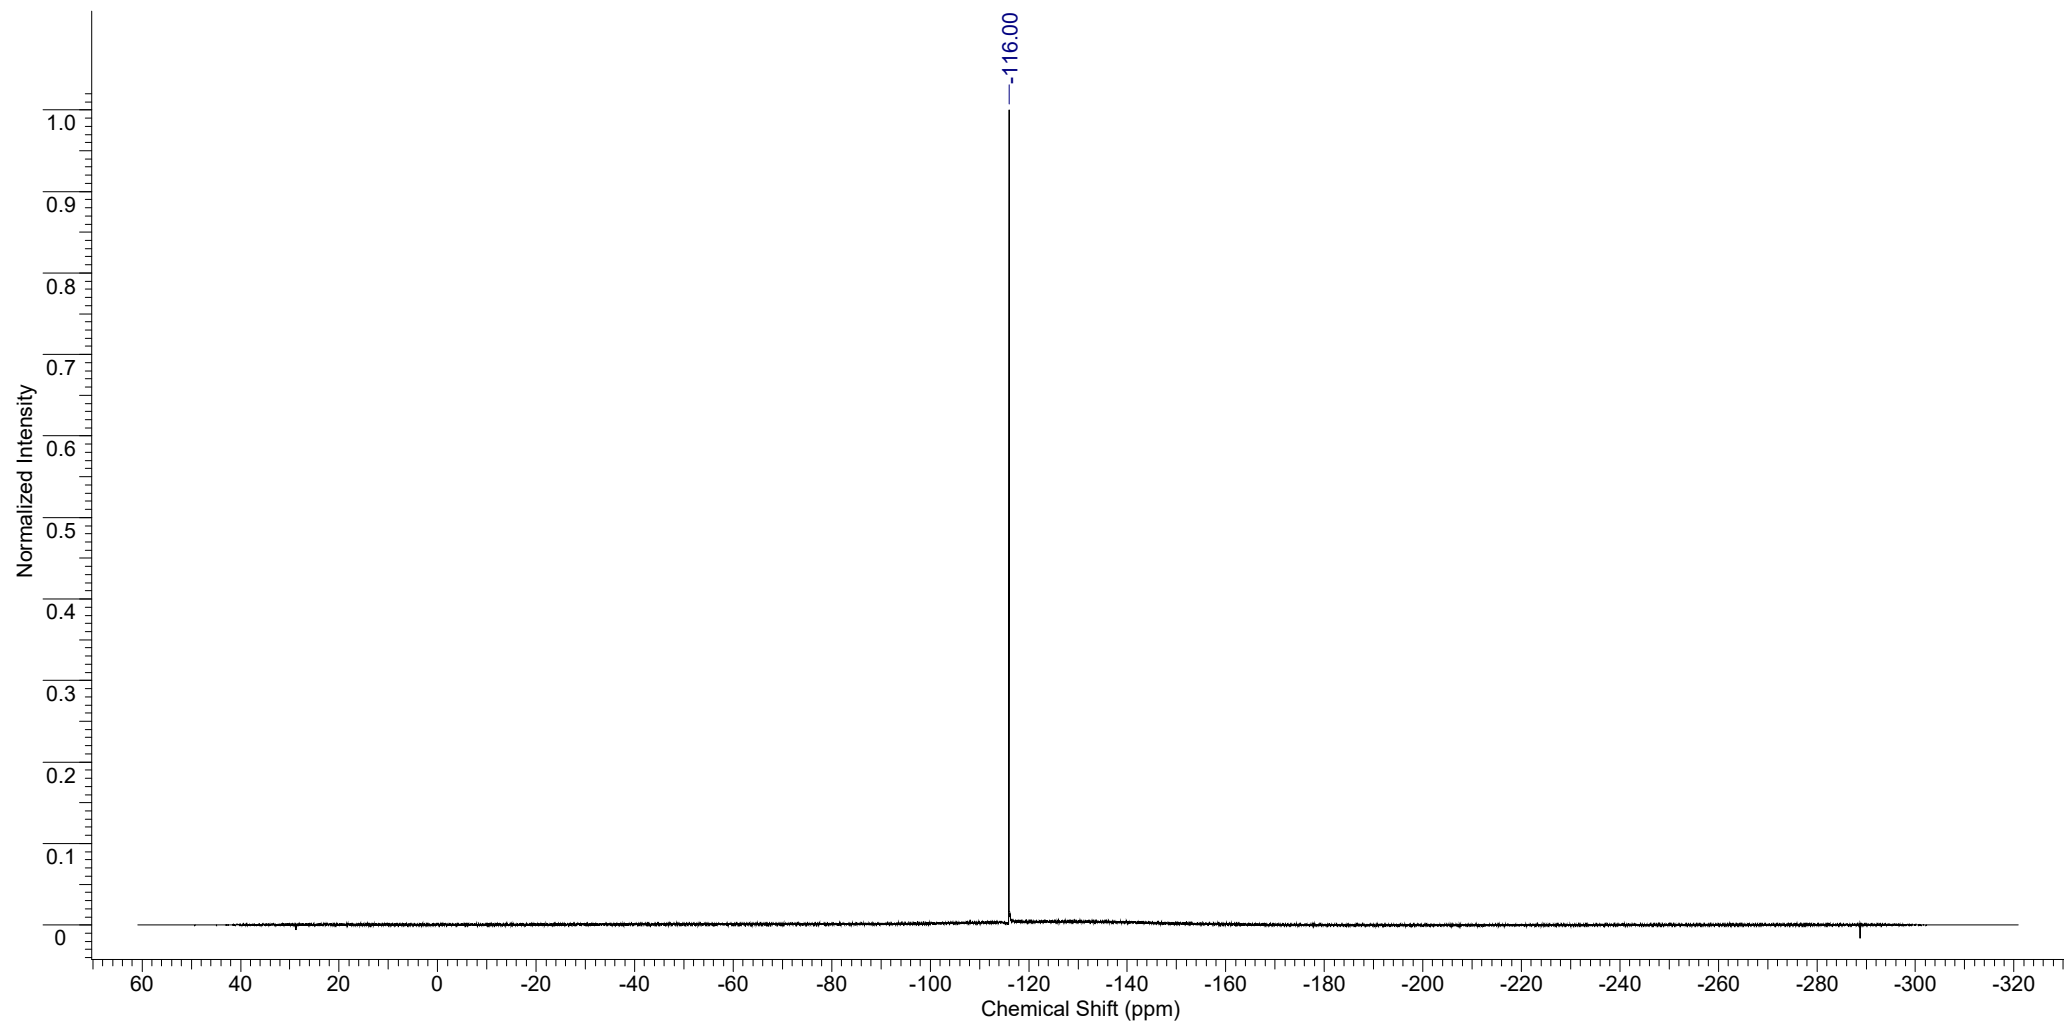

Methyl 6,7-dimethoxy-4b-(4-methoxyphenyl)-2-methyl-4a-phenyl-1,2,4a,4b,8b,8c-hexahydro-2-azabenz[*a*]cyclopropa[*cd*]azulene-4-carboxylate (2o)

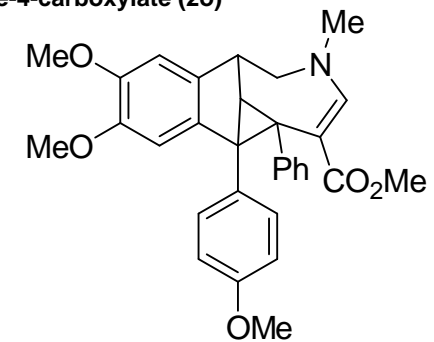

<sup>1</sup>H NMR spectra for 2o.

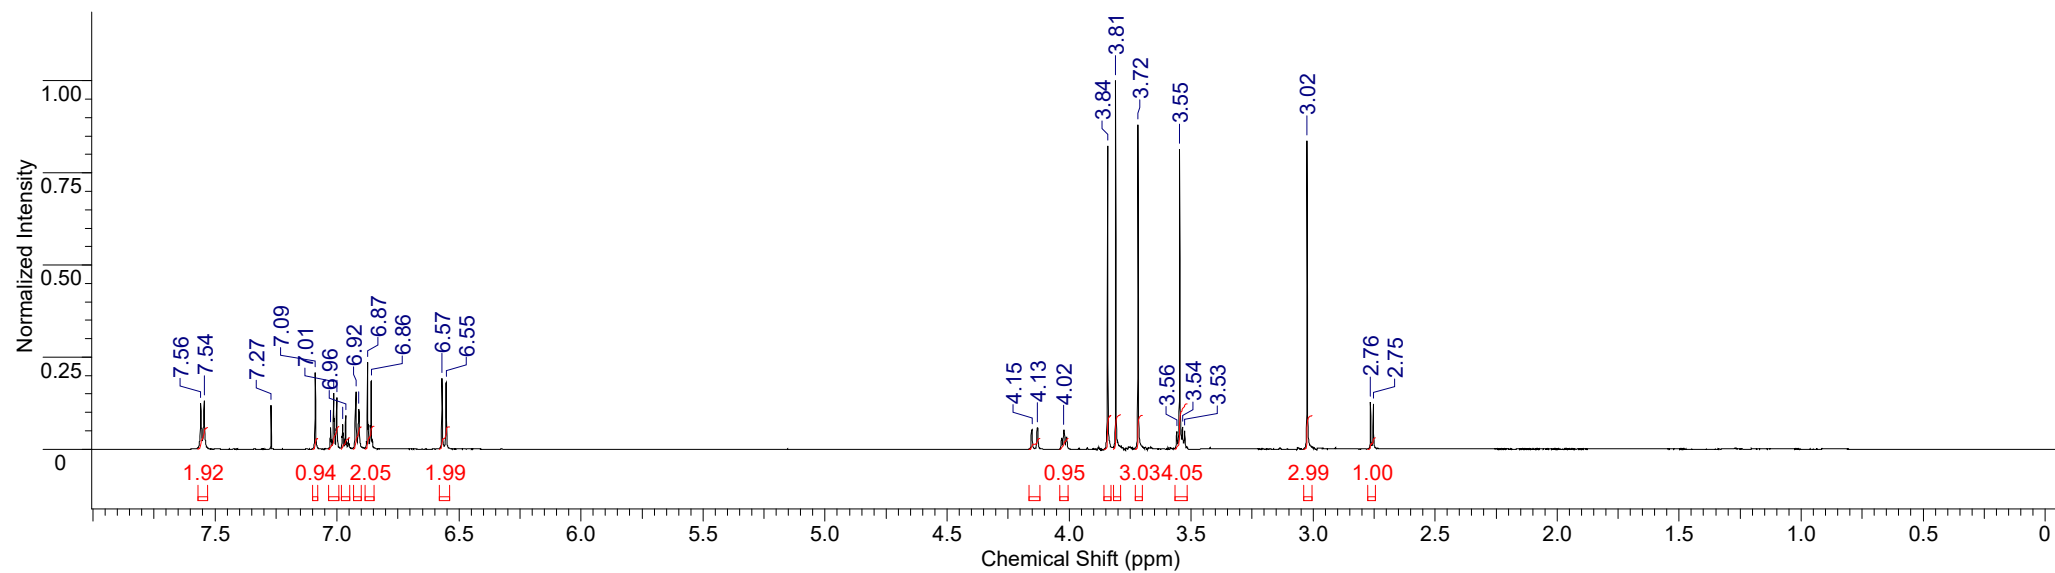



<sup>1</sup>H NMR spectra for 2o.

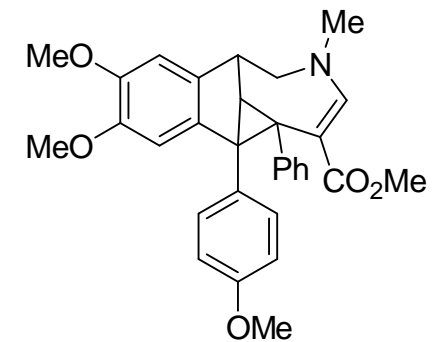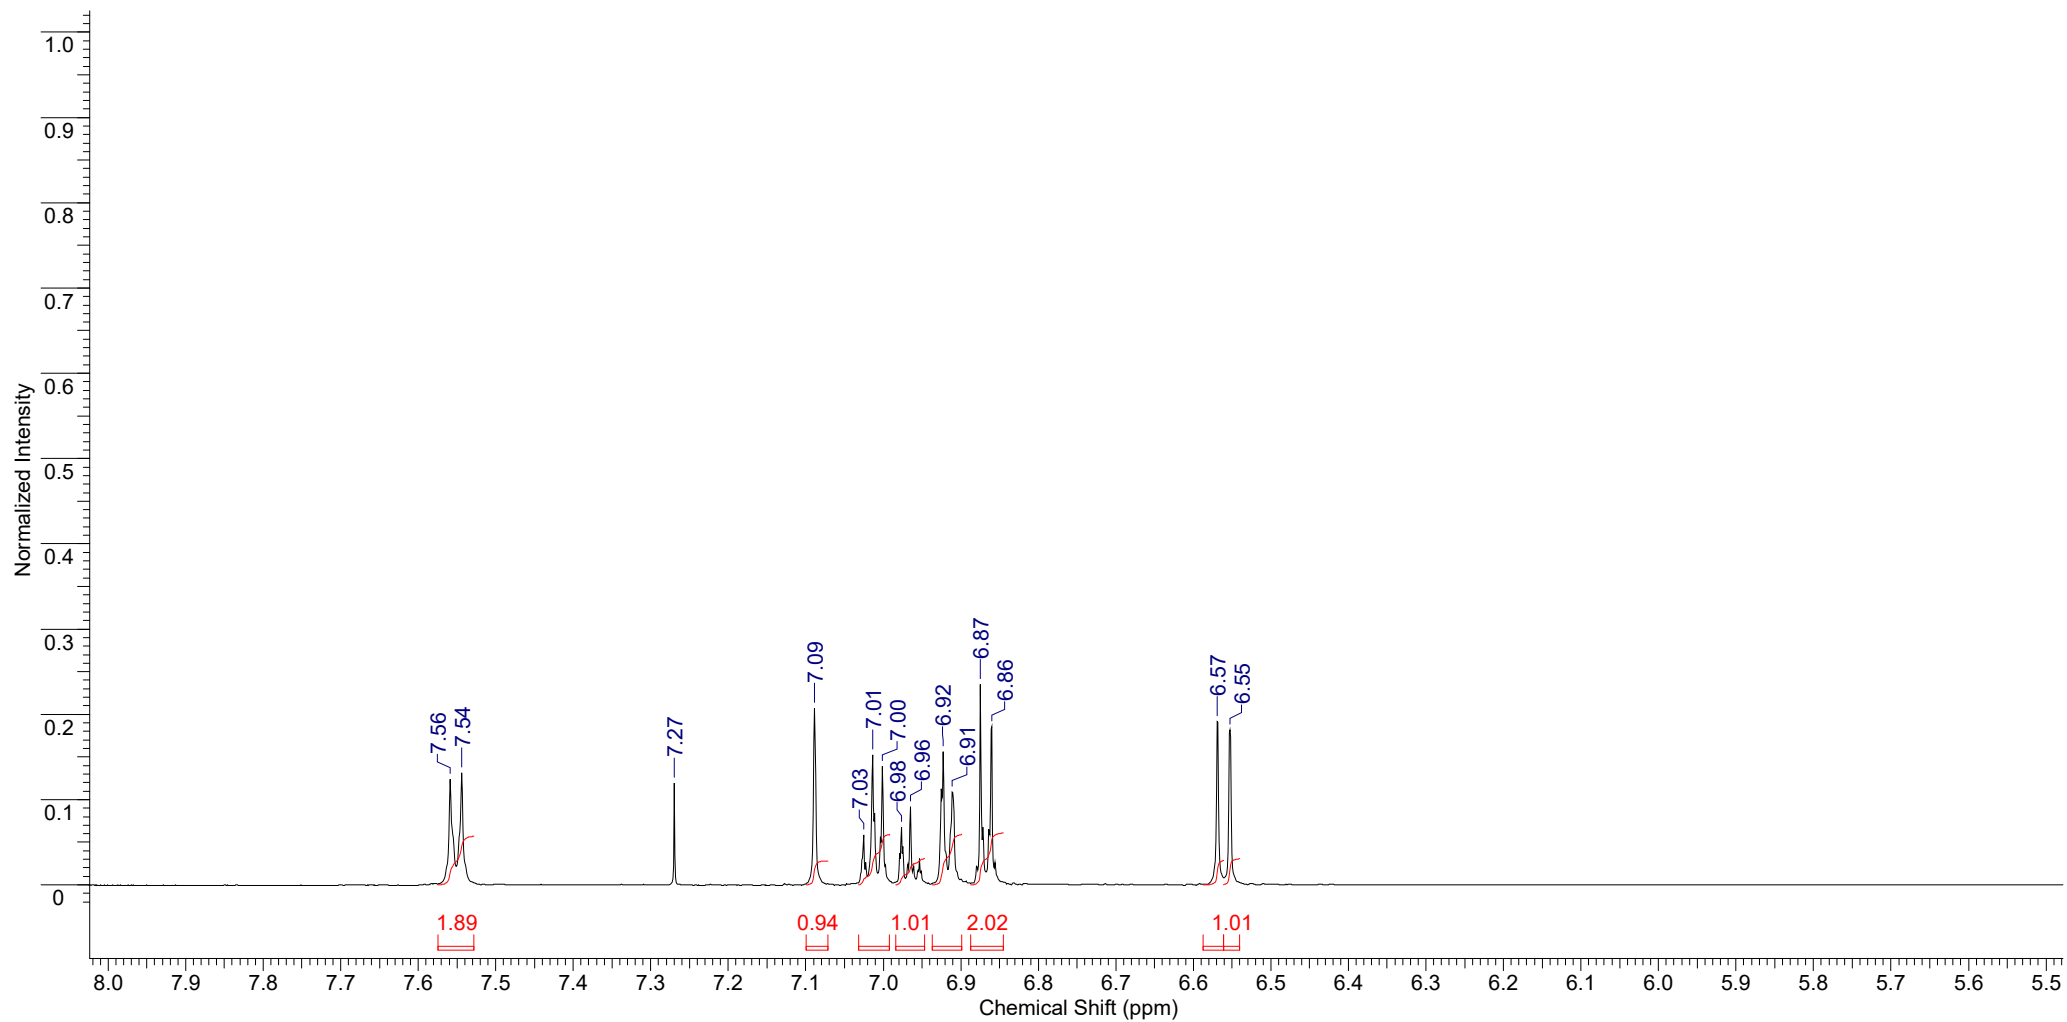

<sup>1</sup>H NMR spectra for 2o.

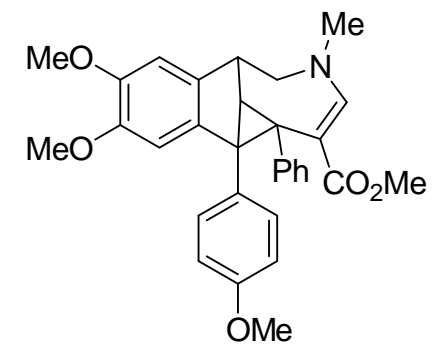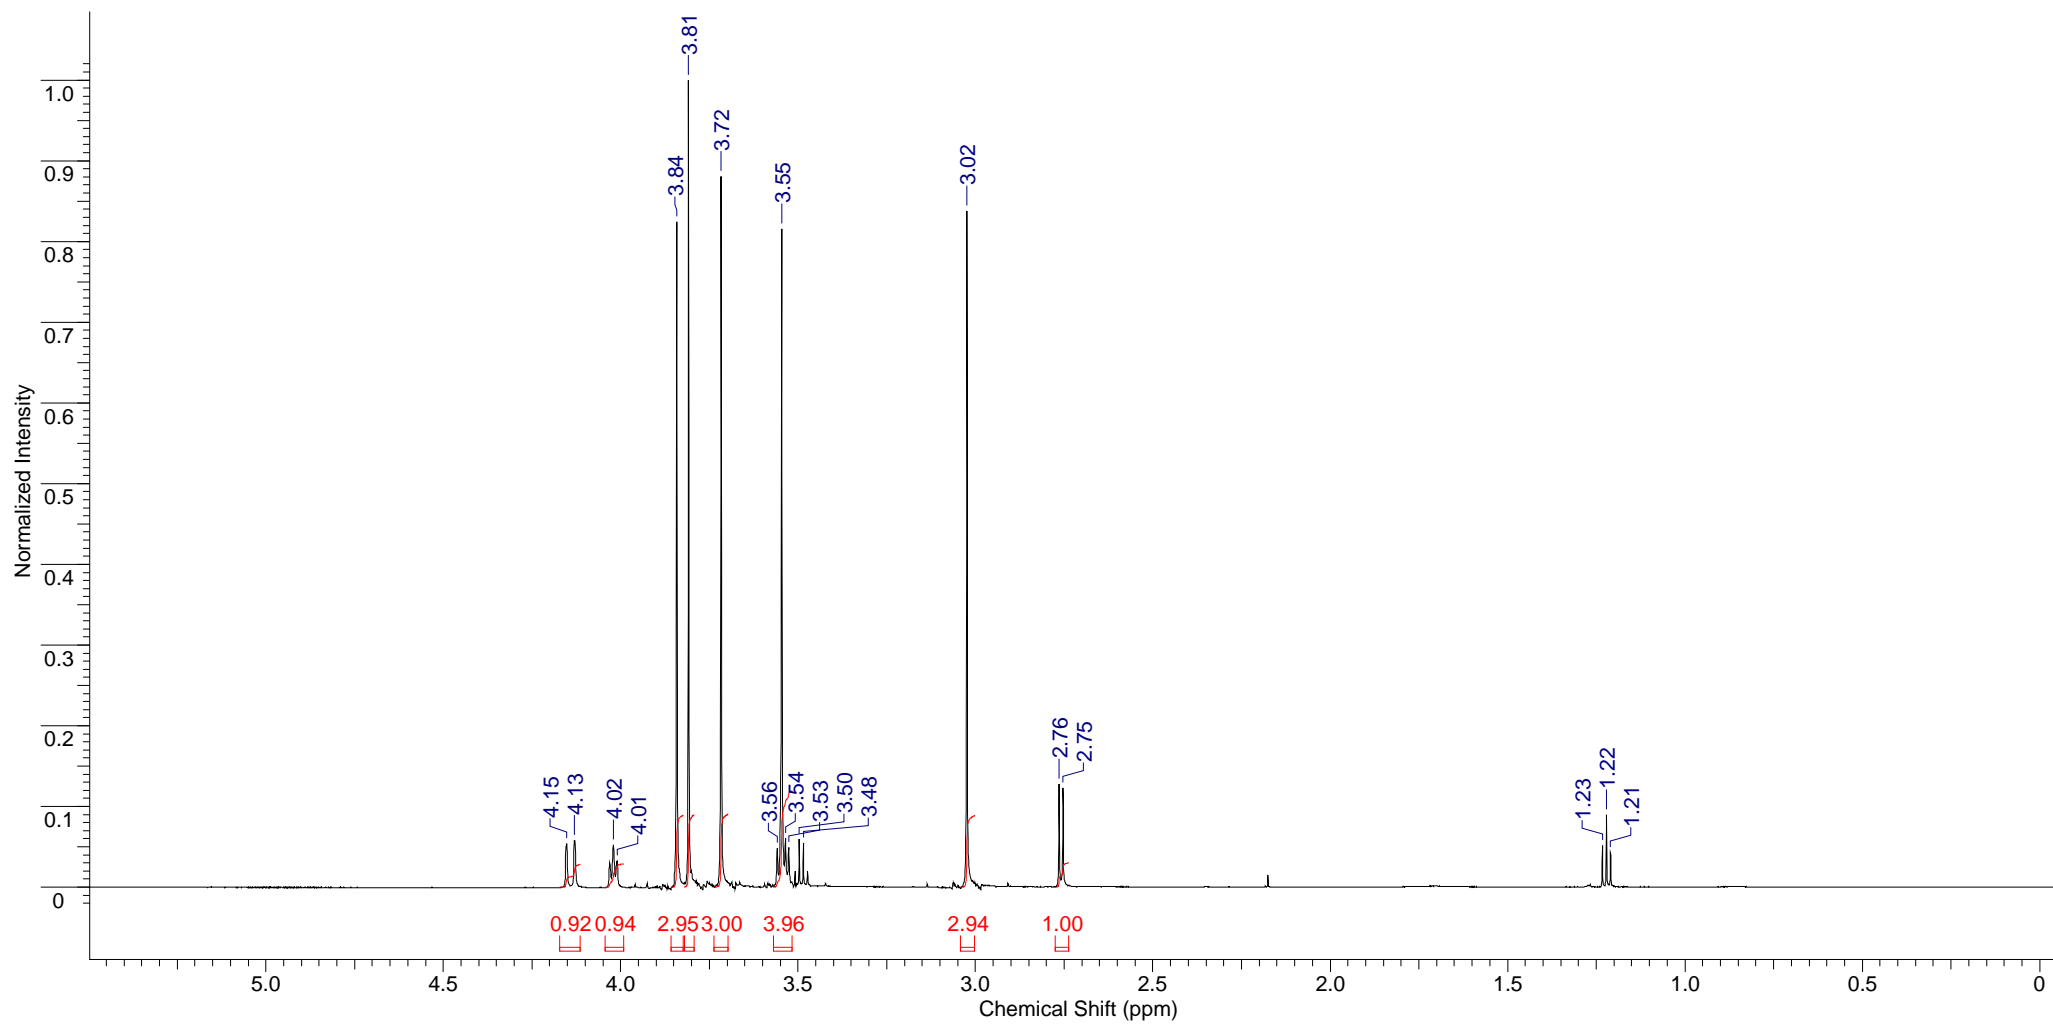

<sup>13</sup>C NMR spectra for 2o.

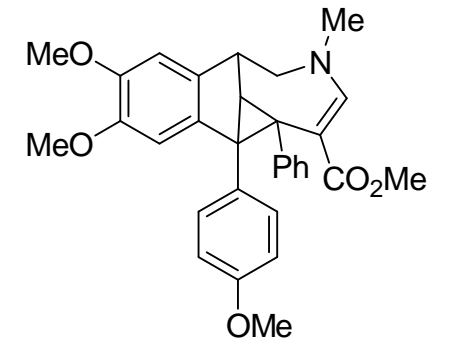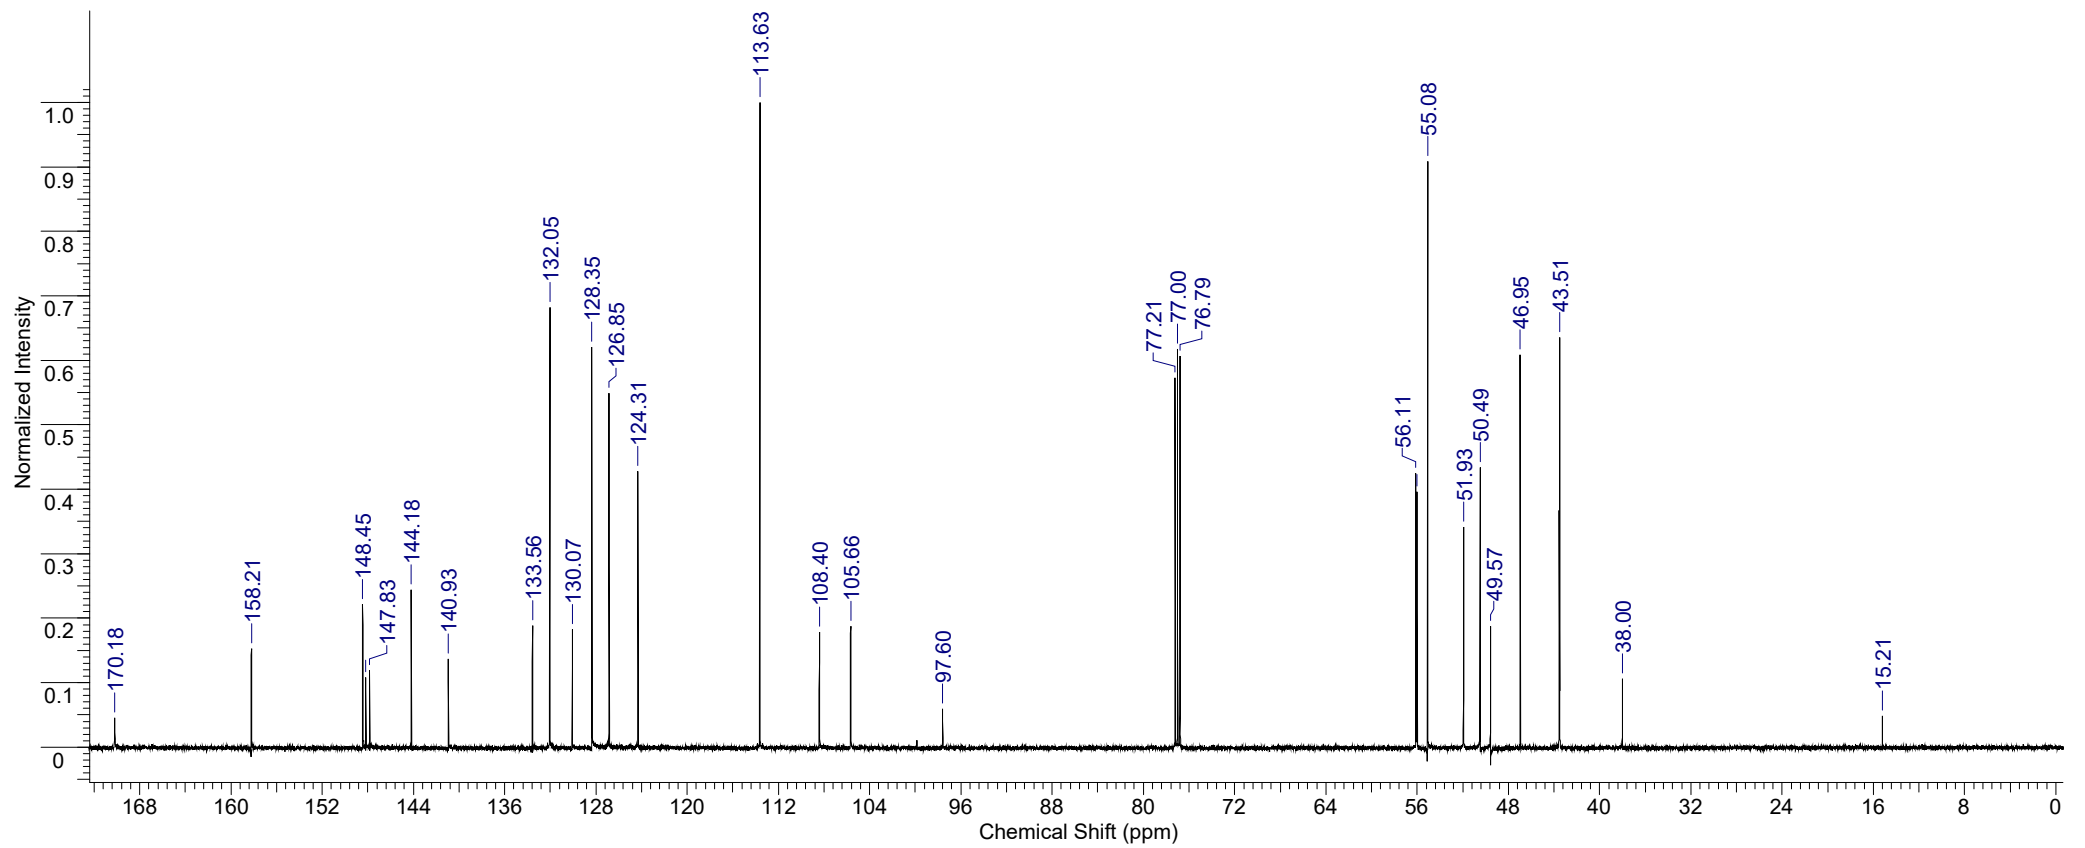

<sup>13</sup>C NMR spectra for 2o.

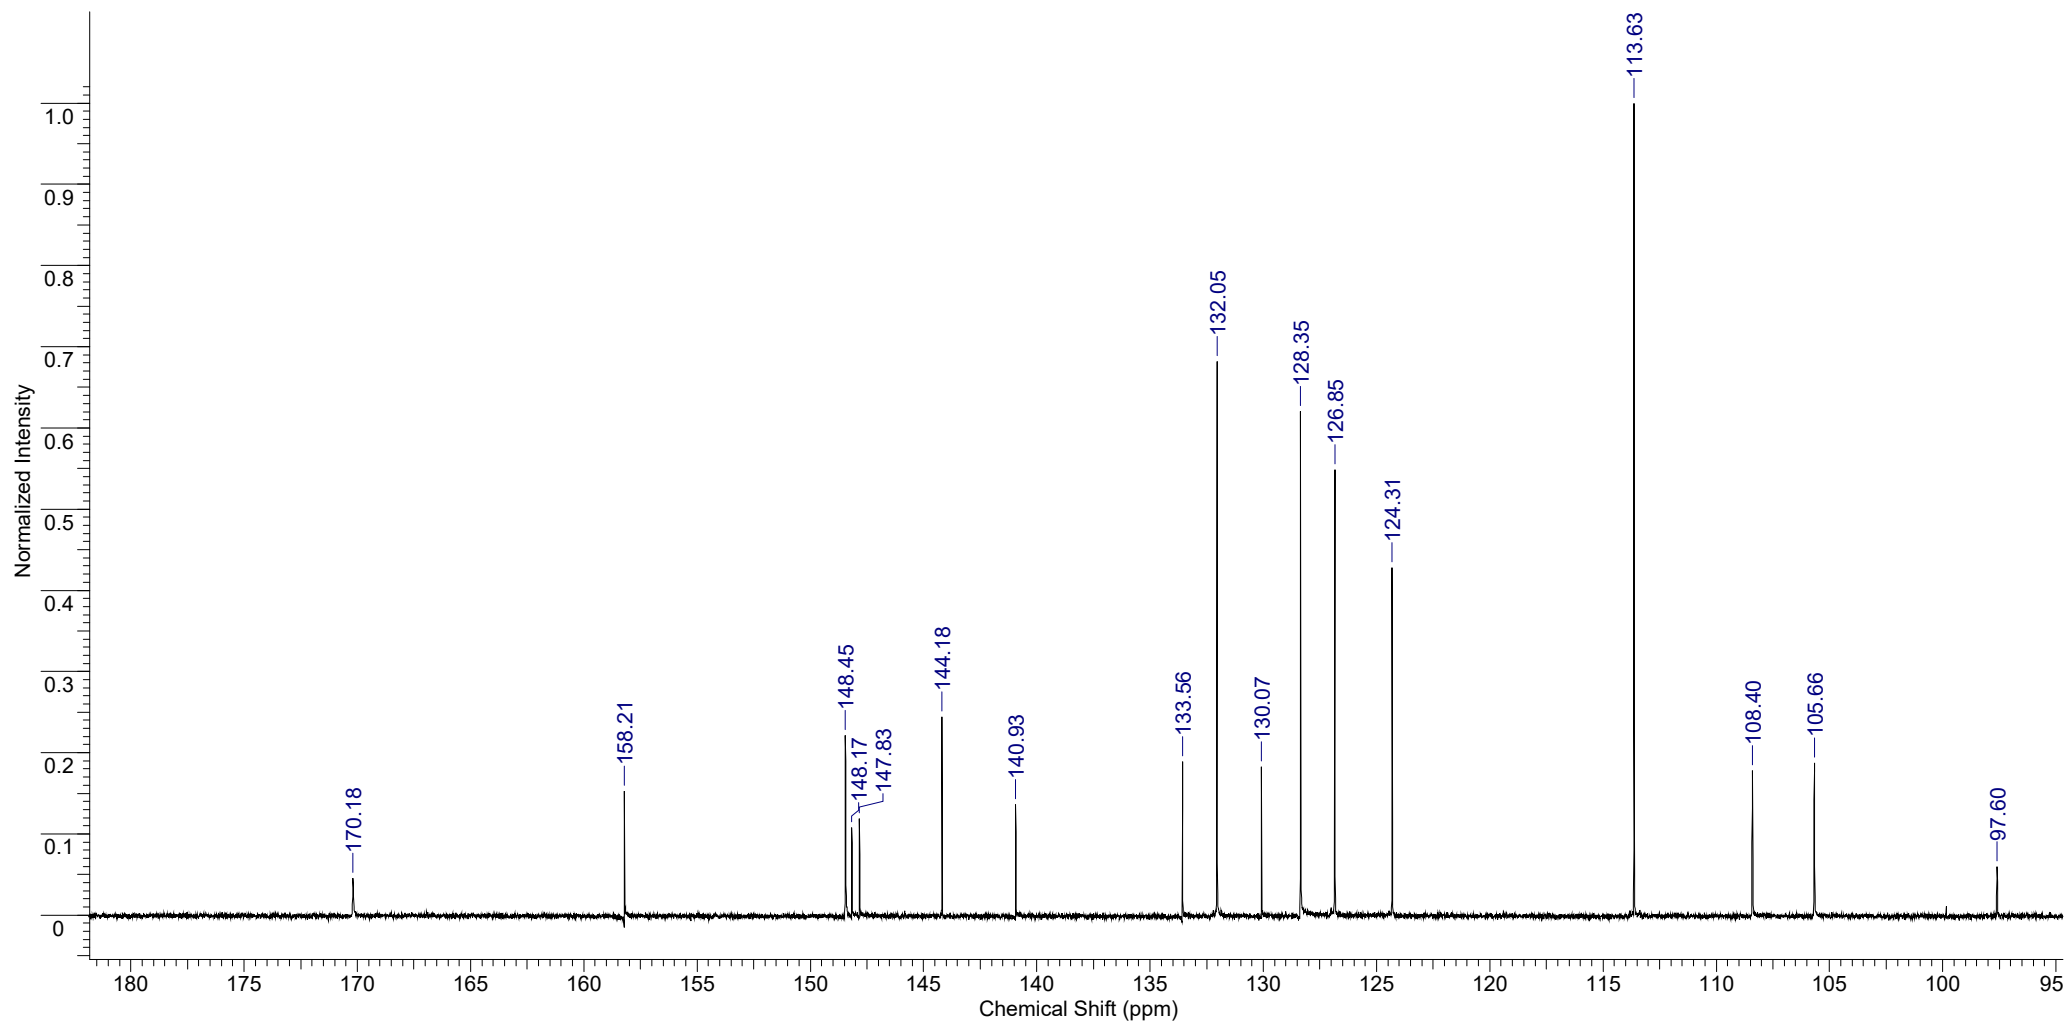

<sup>13</sup>C NMR spectra for 2o.

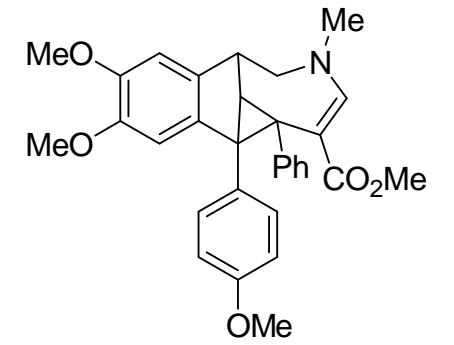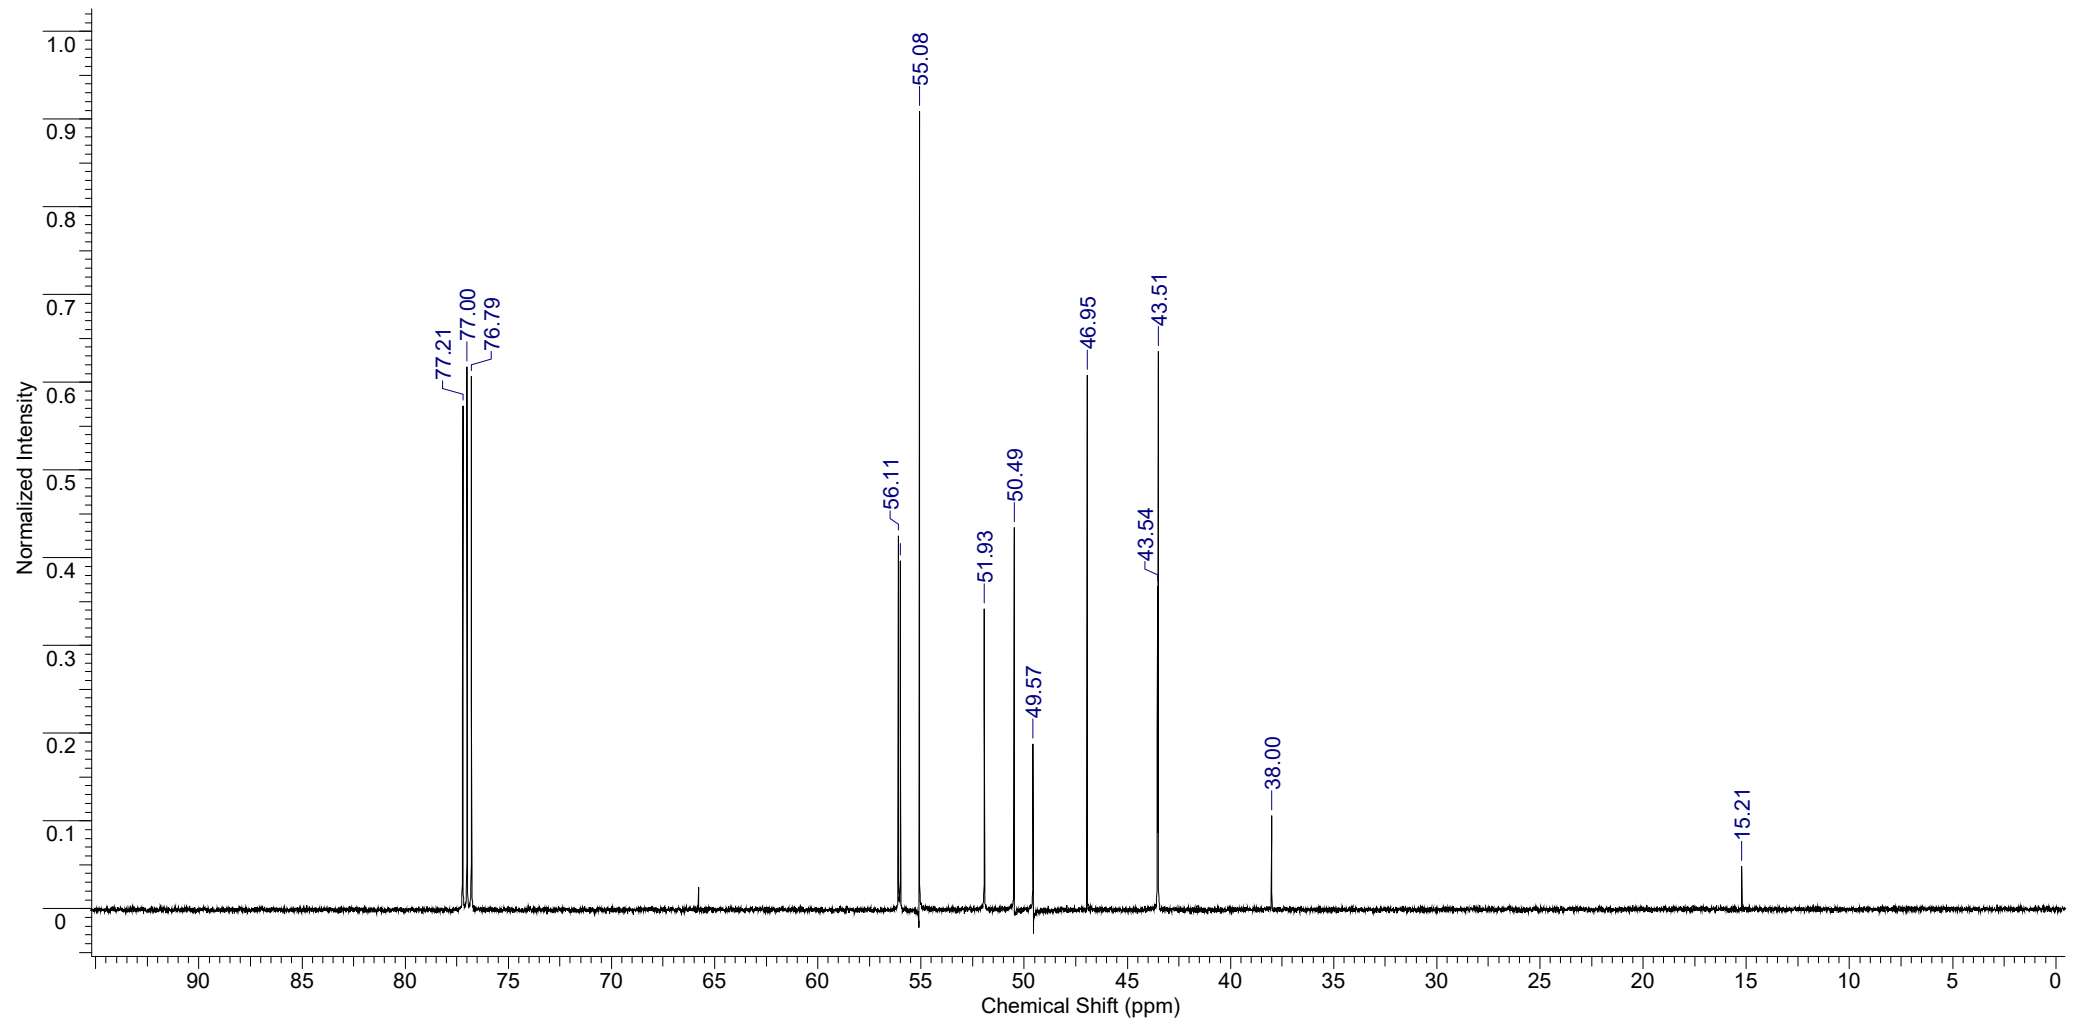

1-[6,7-Dimethoxy-4b-(4-methoxyphenyl)-2-methyl-4a-phenyl-1,2,4a,4b,8b,8c-hexahydro-2-azabenz[*a*]cyclopropa[*cd*]azulen-4-yl]ethanone (2p)

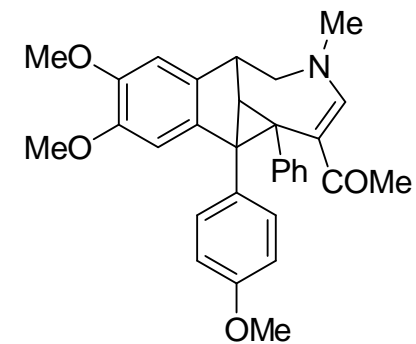

$^1\text{H}$  NMR spectra for 2p.

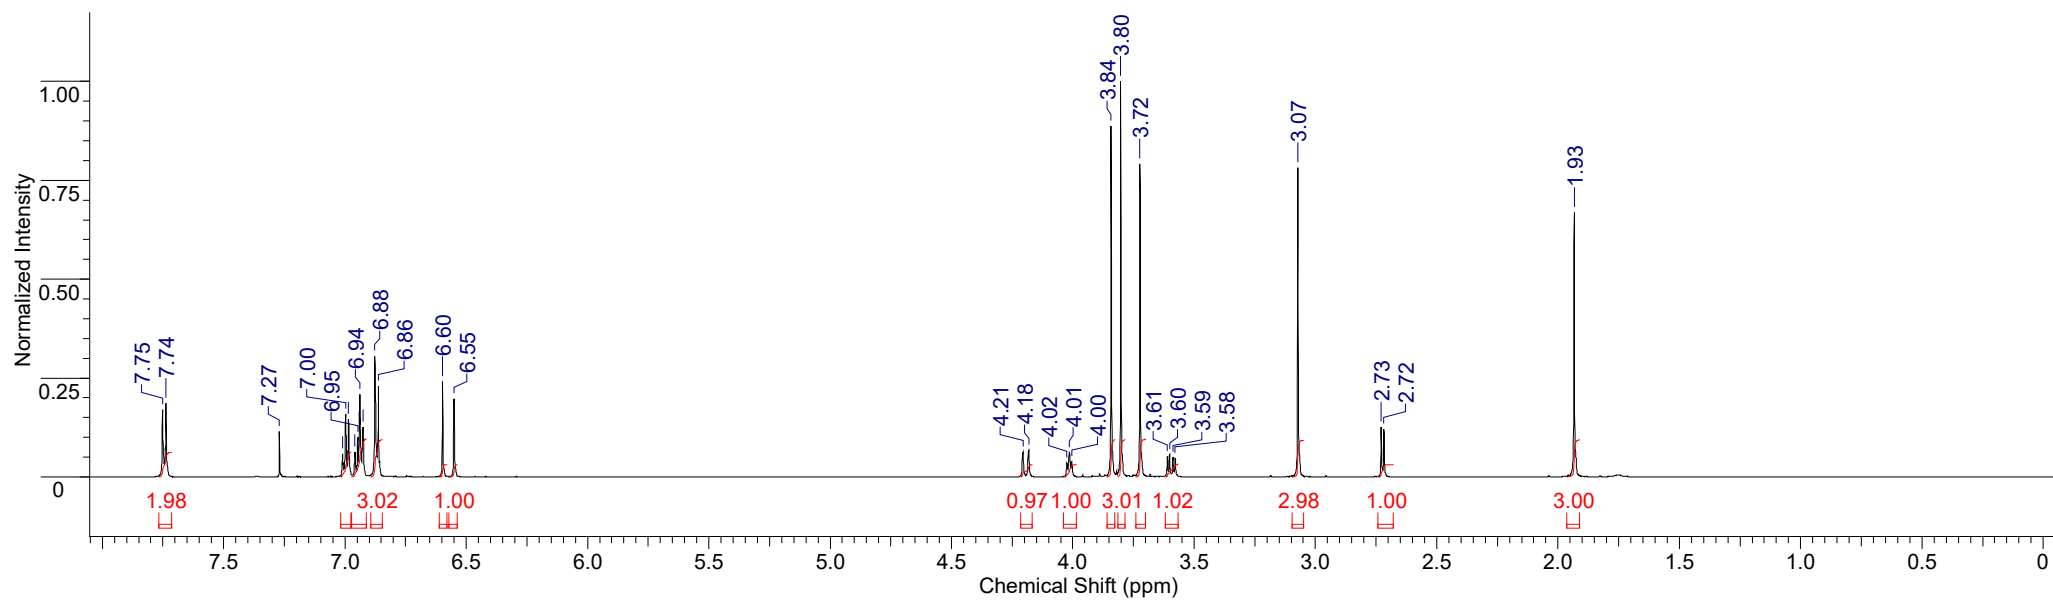

<sup>1</sup>H NMR spectra for 2p.

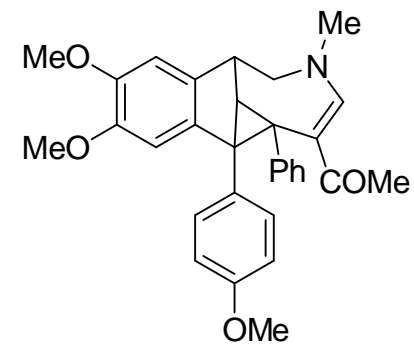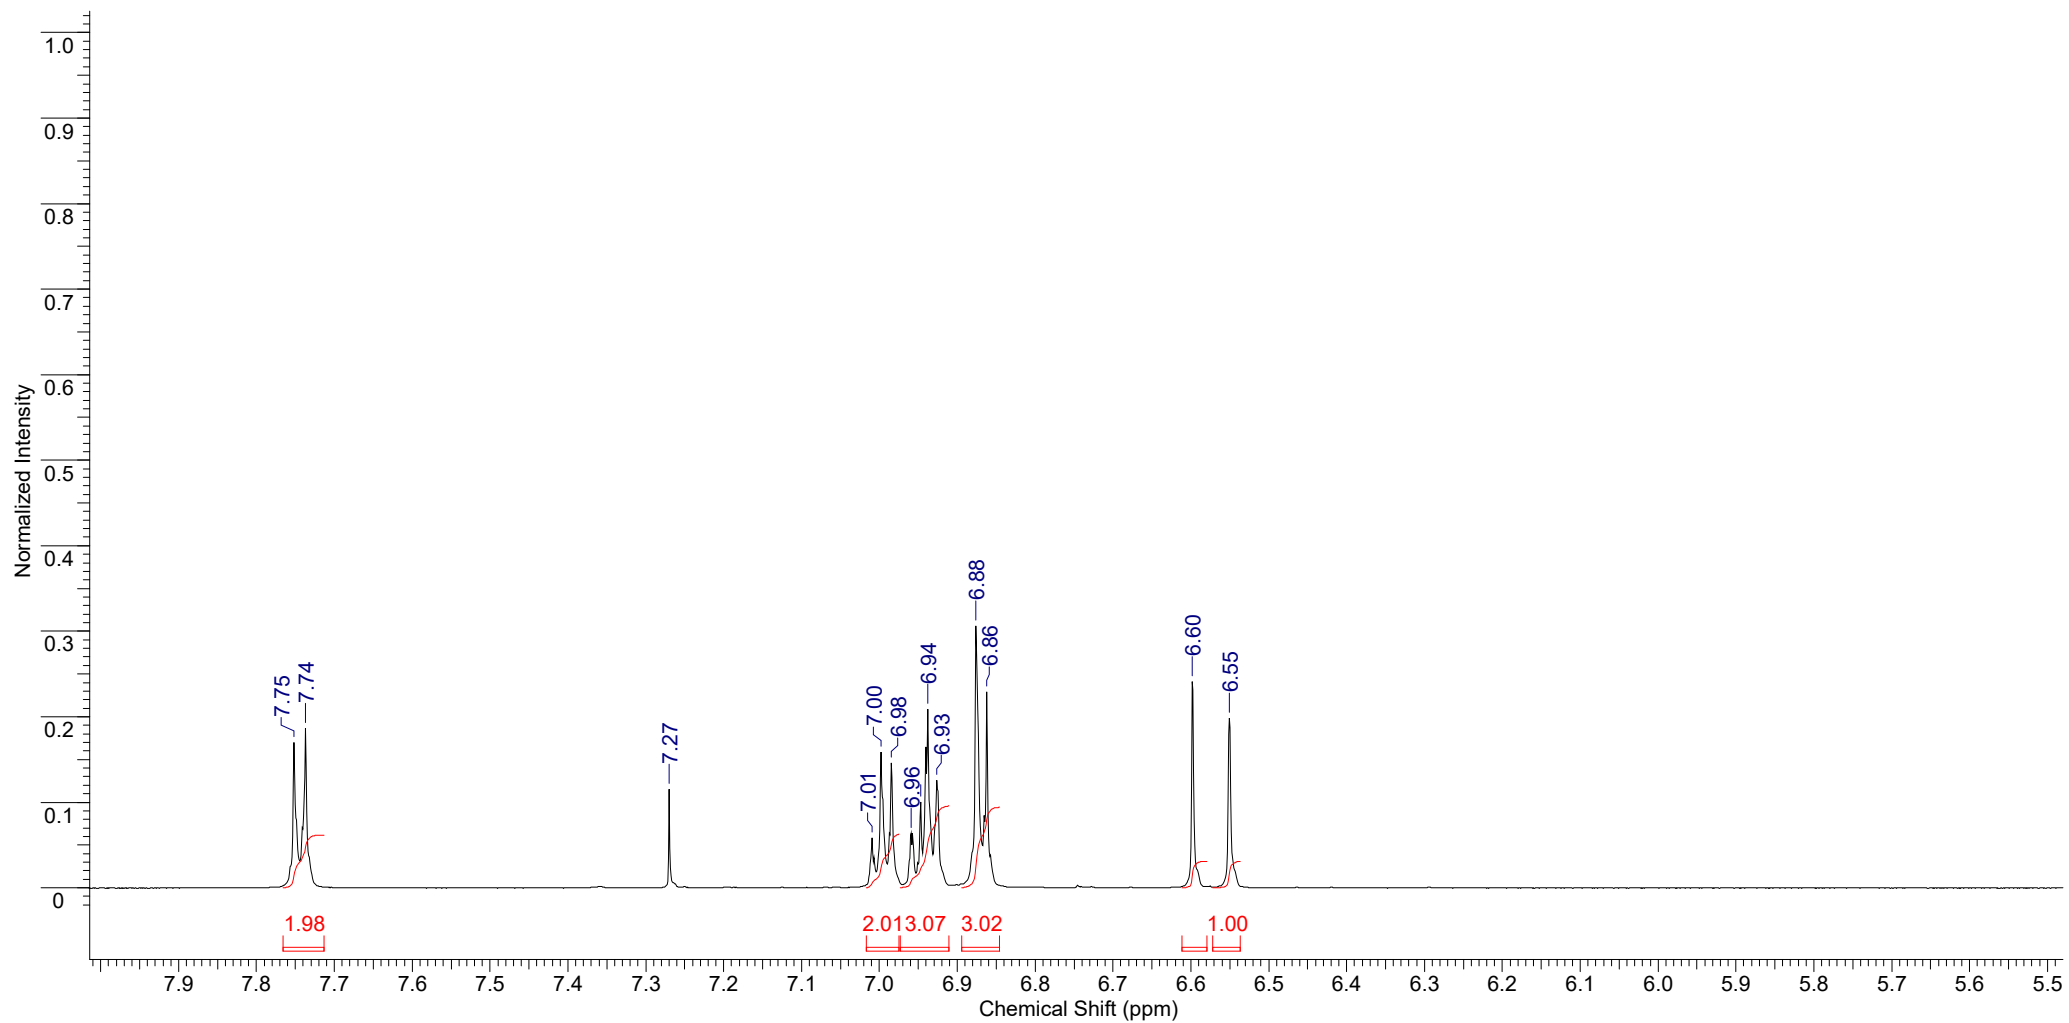

<sup>1</sup>H NMR spectra for 2p.

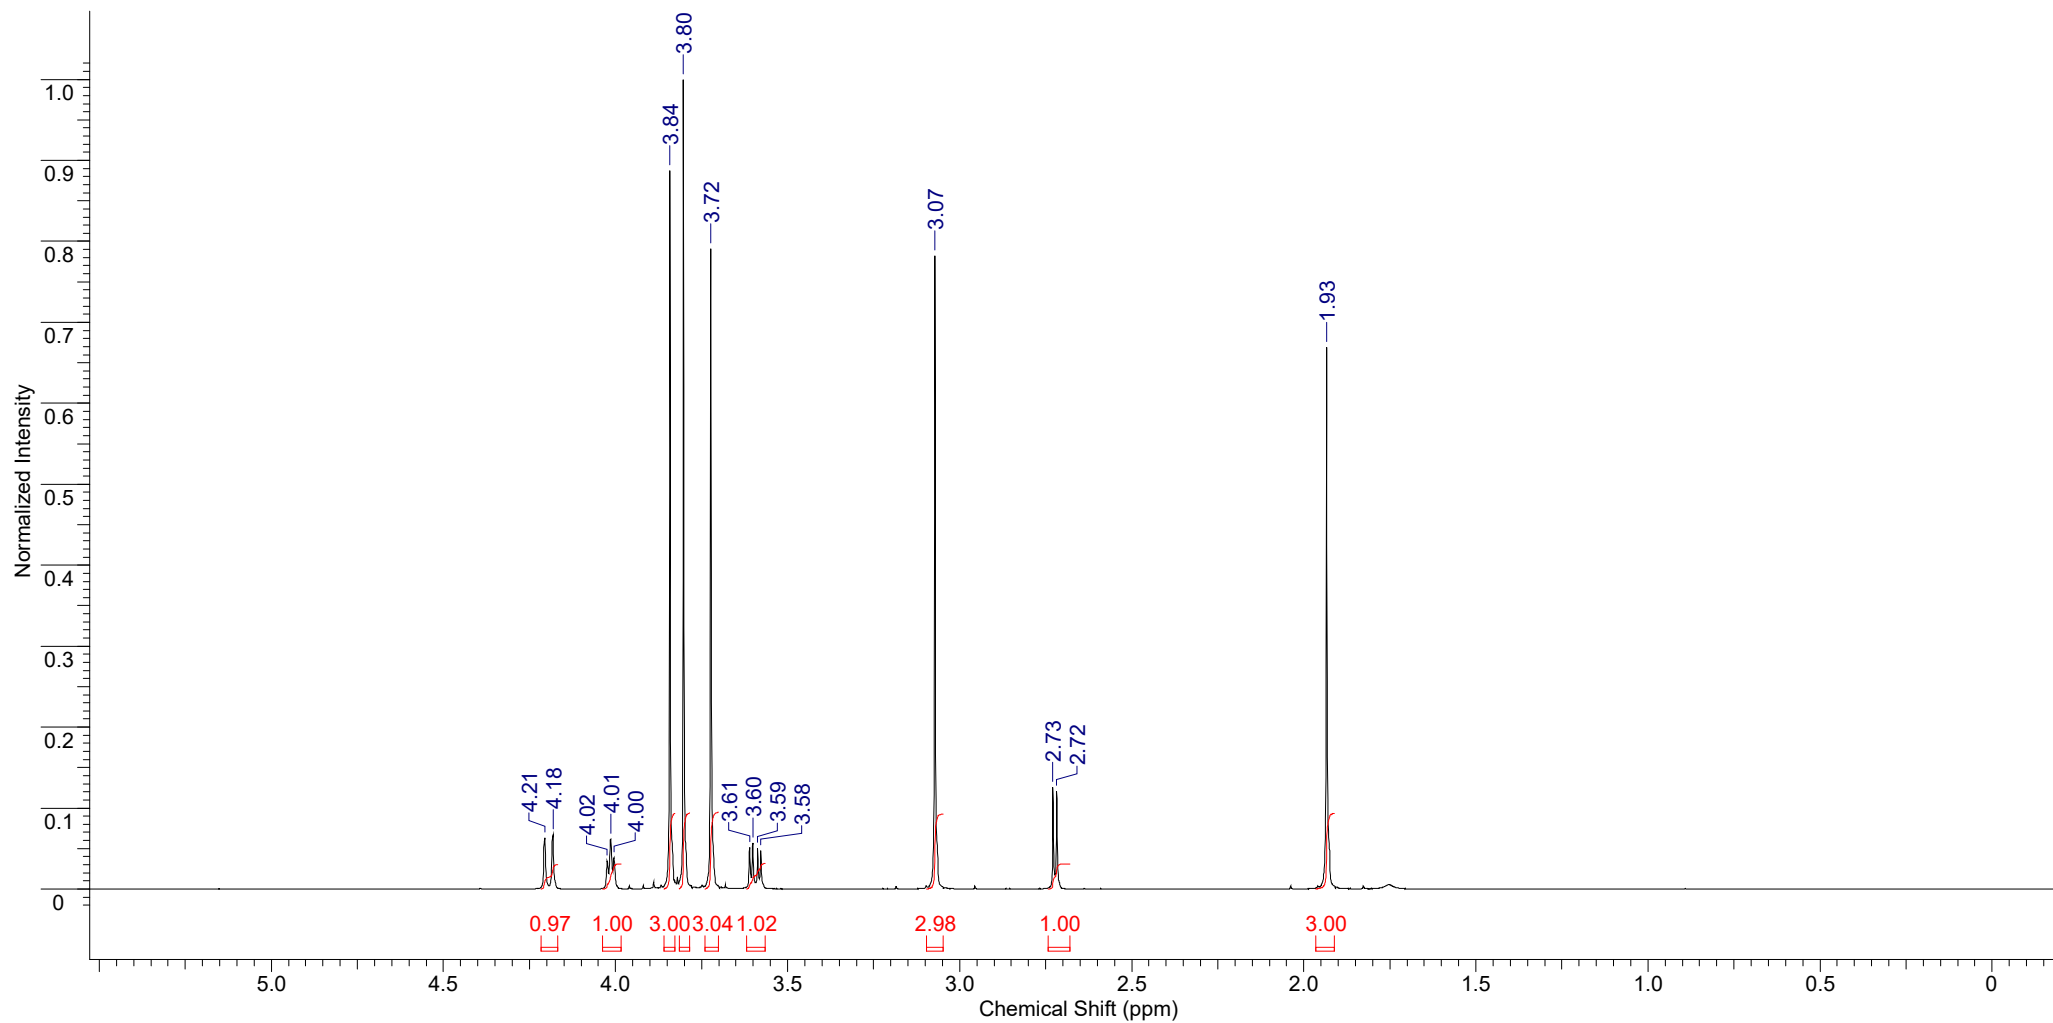



<sup>13</sup>C NMR spectra for 2p.

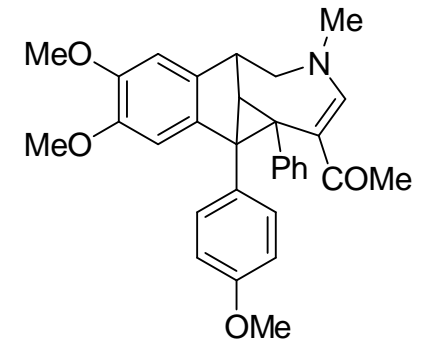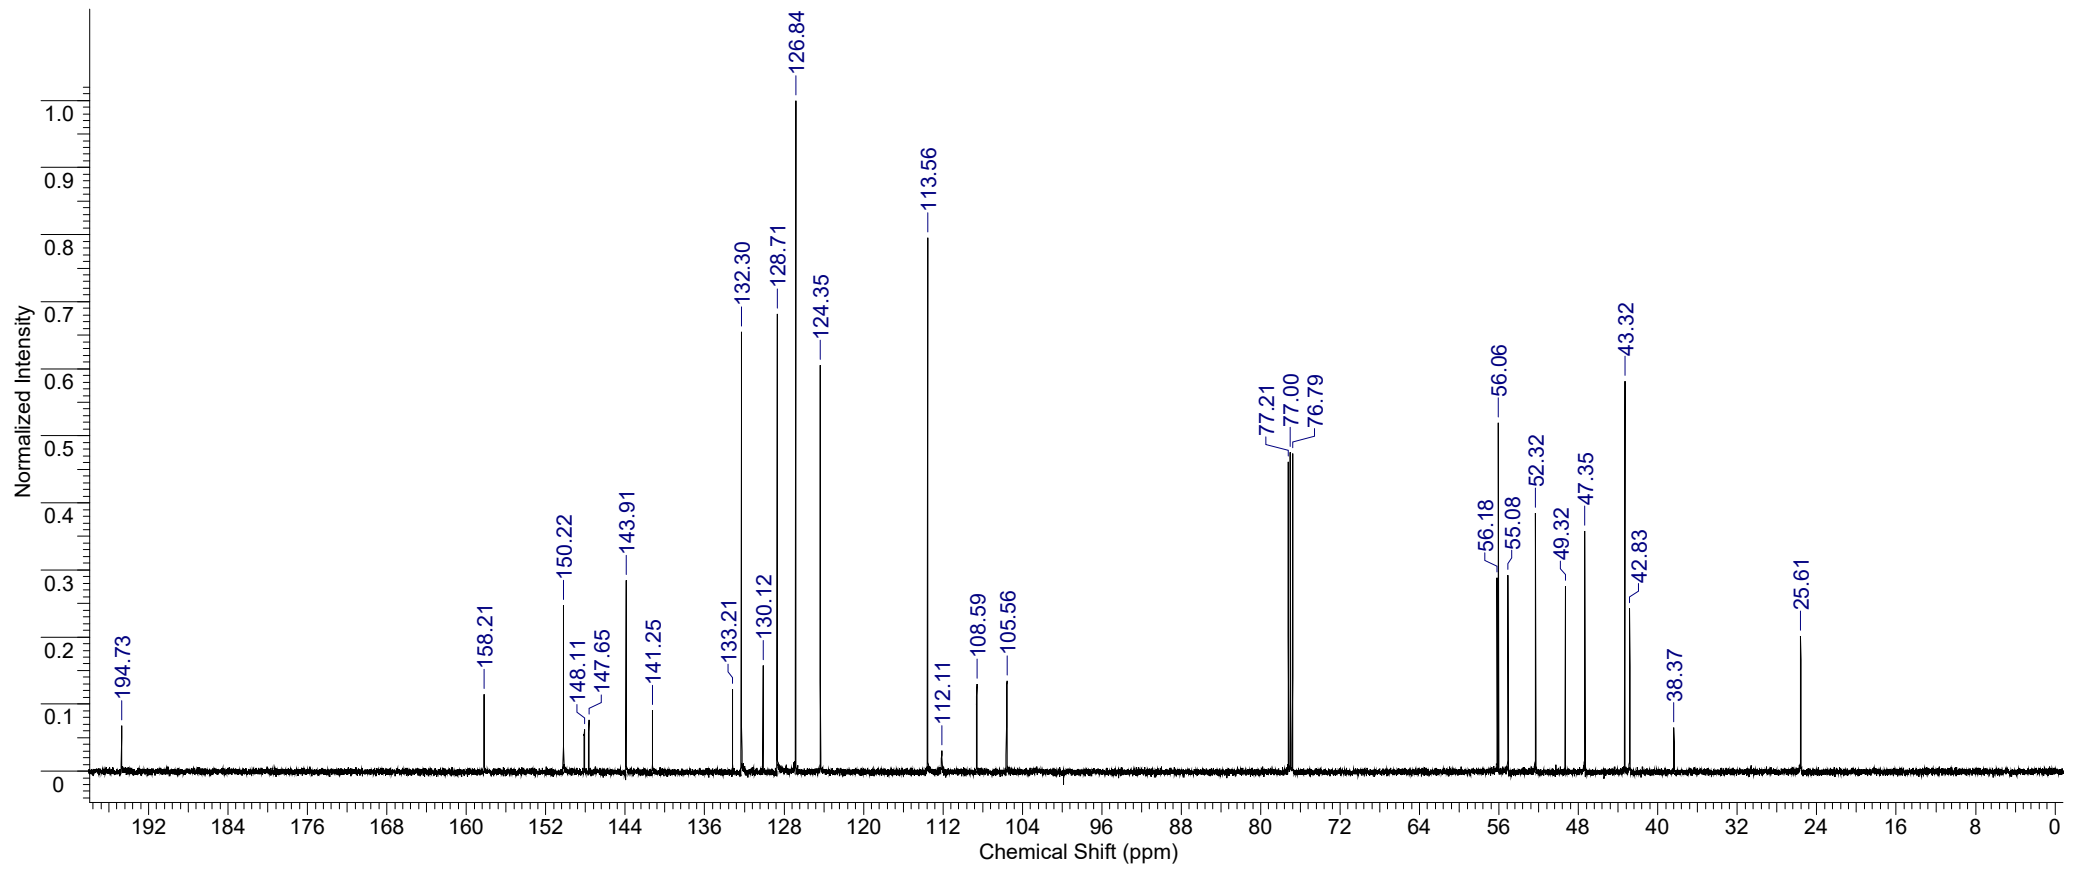

<sup>13</sup>C NMR spectra for 2p.

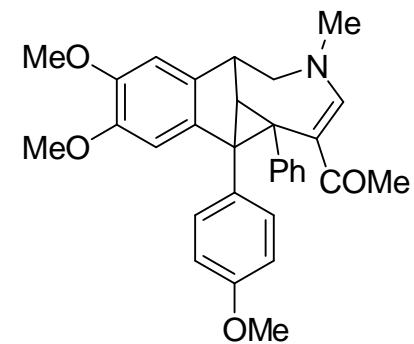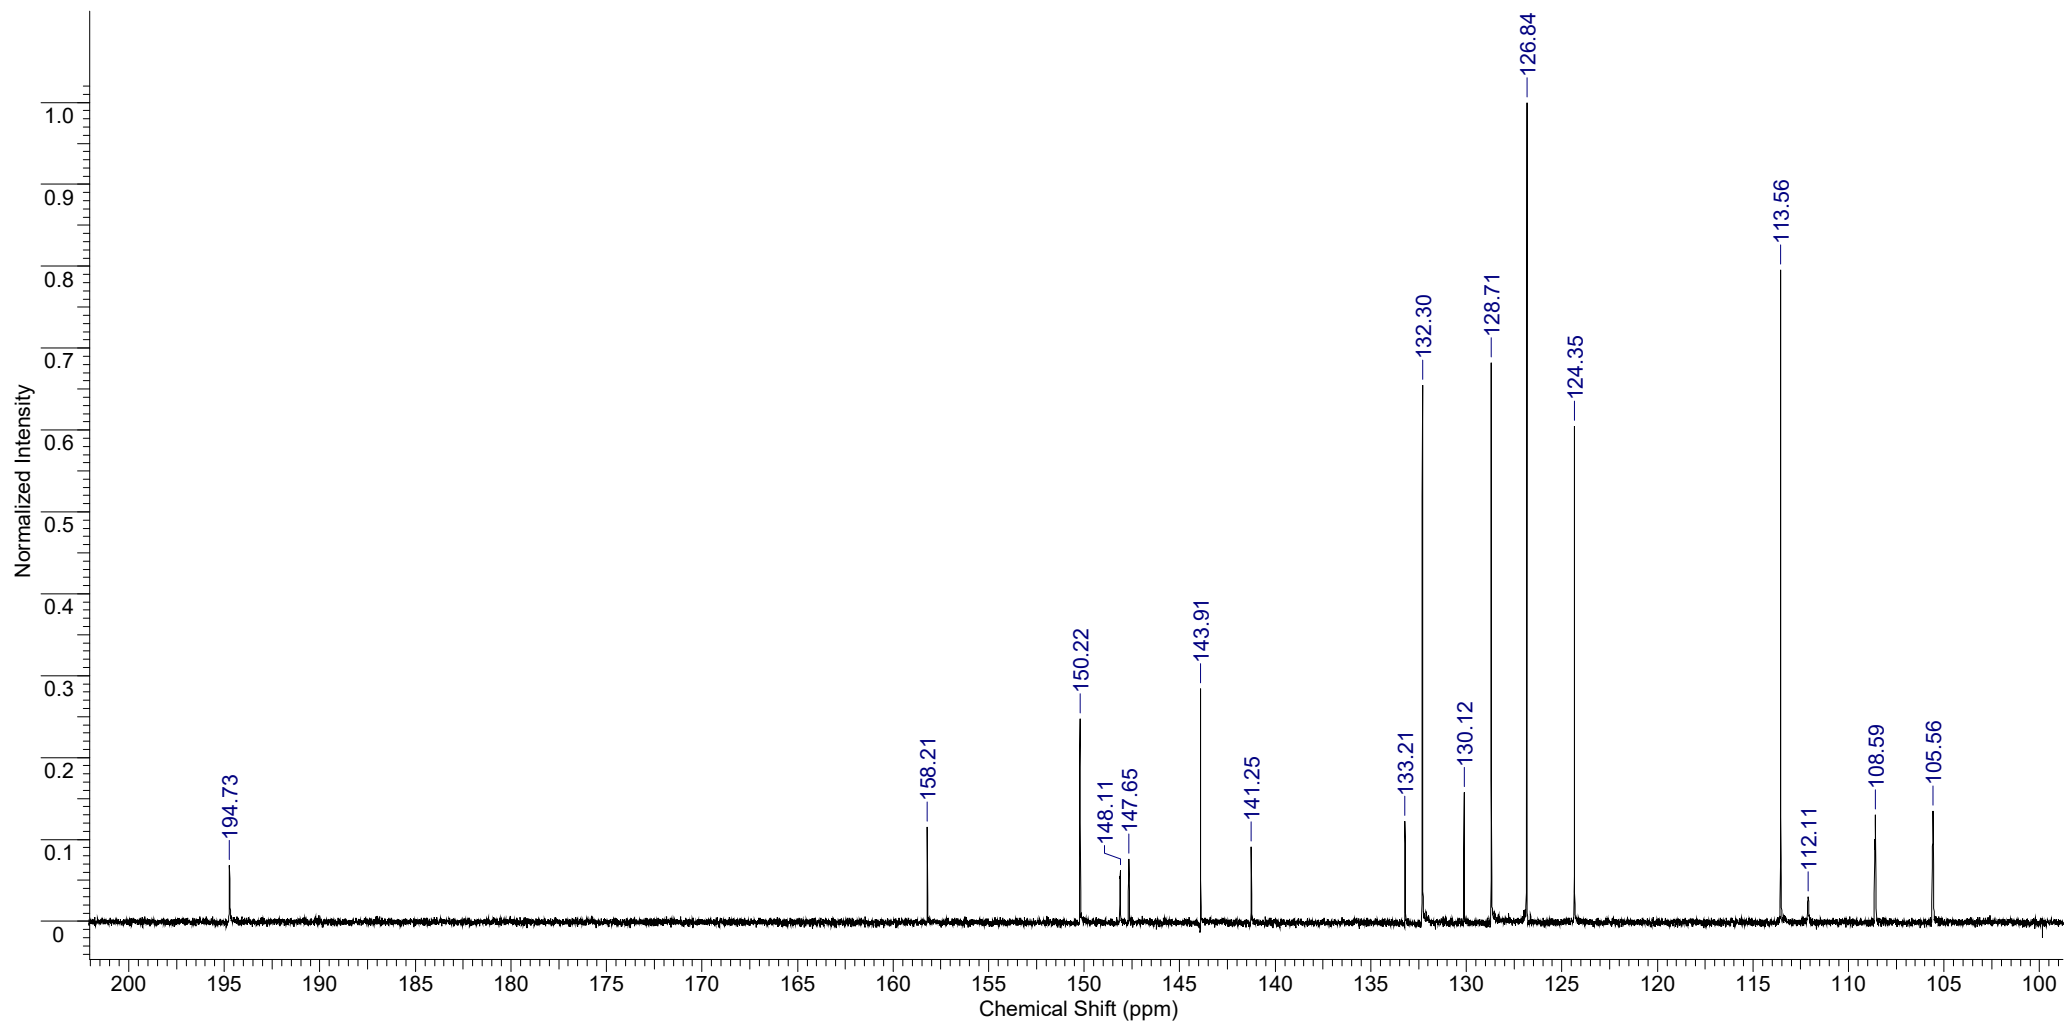

<sup>13</sup>C NMR spectra for 2p.

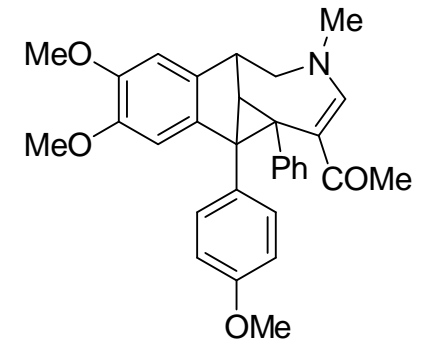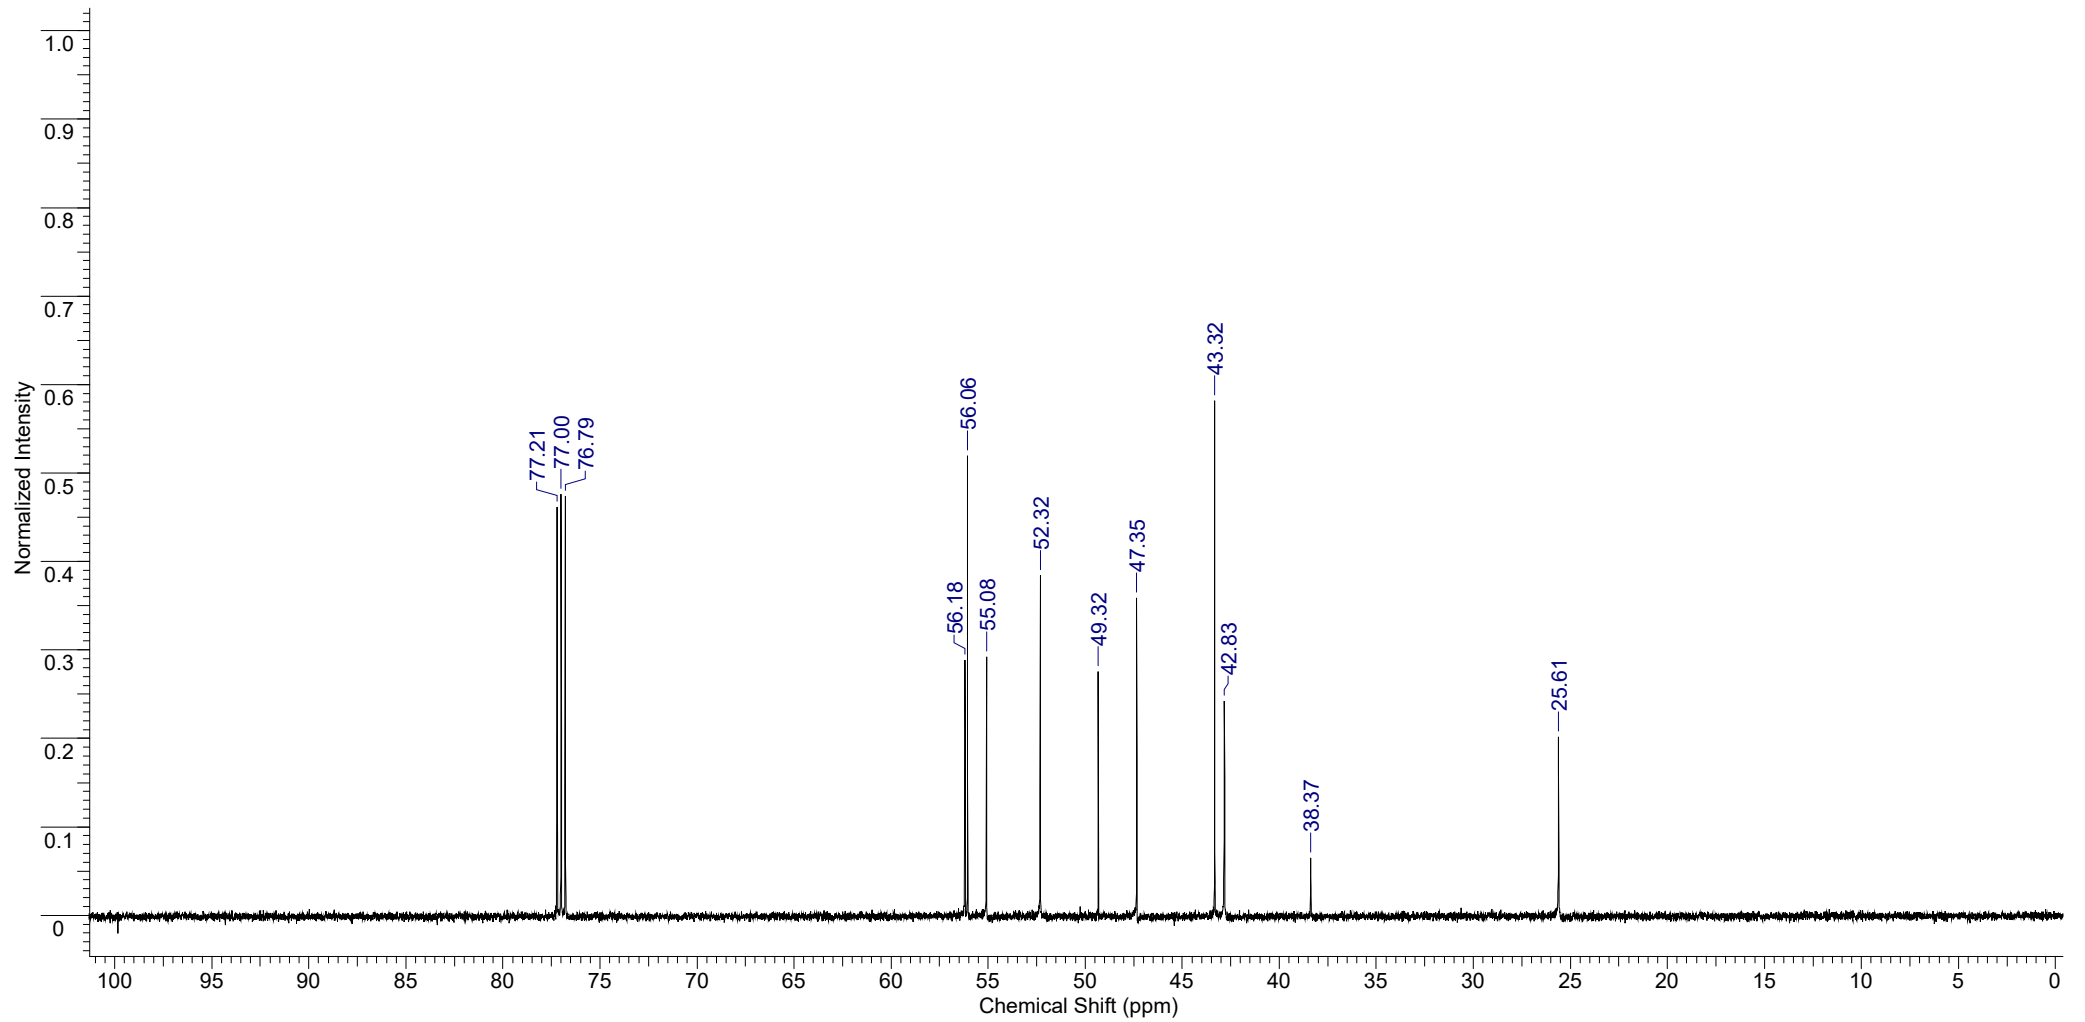

Methyl 6,7-dimethoxy-2-methyl-4b-(4-methylphenyl)-4a-phenyl-1,2,4a,4b,8b,8c-hexahydro-2-azabenz[*a*]cyclopropa[*cd*]azulene-4-carboxylate (2q)

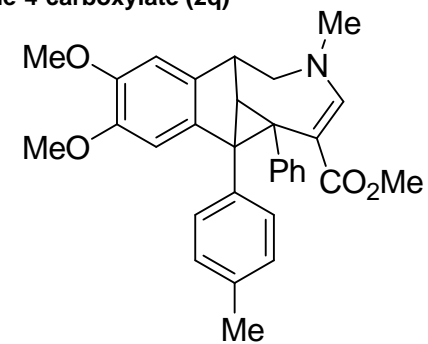

<sup>1</sup>H NMR spectra for 2q.

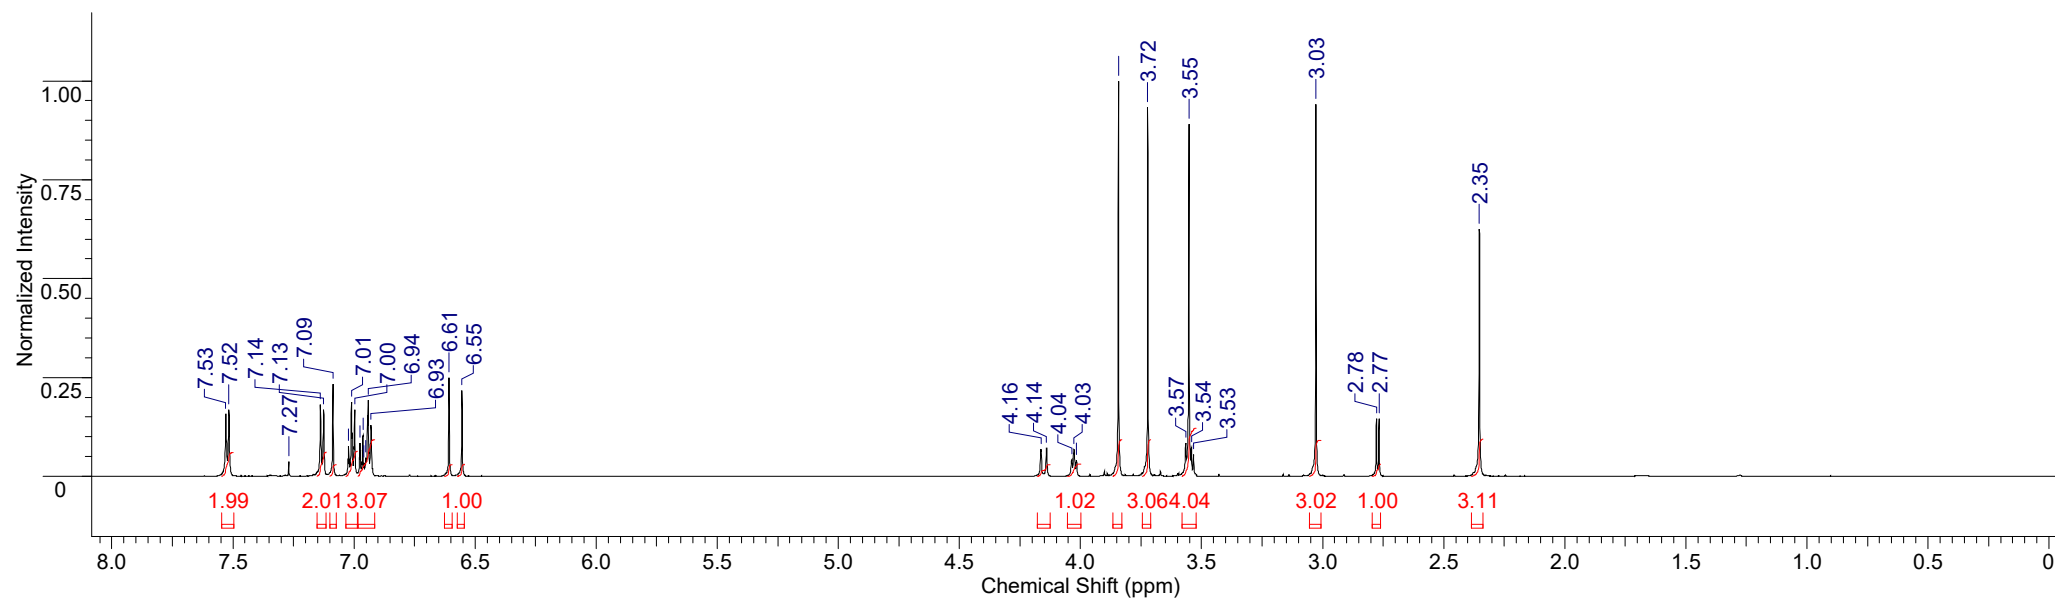

<sup>1</sup>H NMR spectra for 2q.

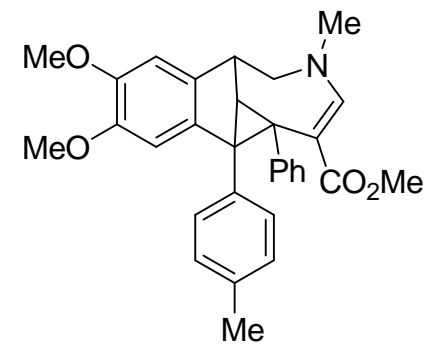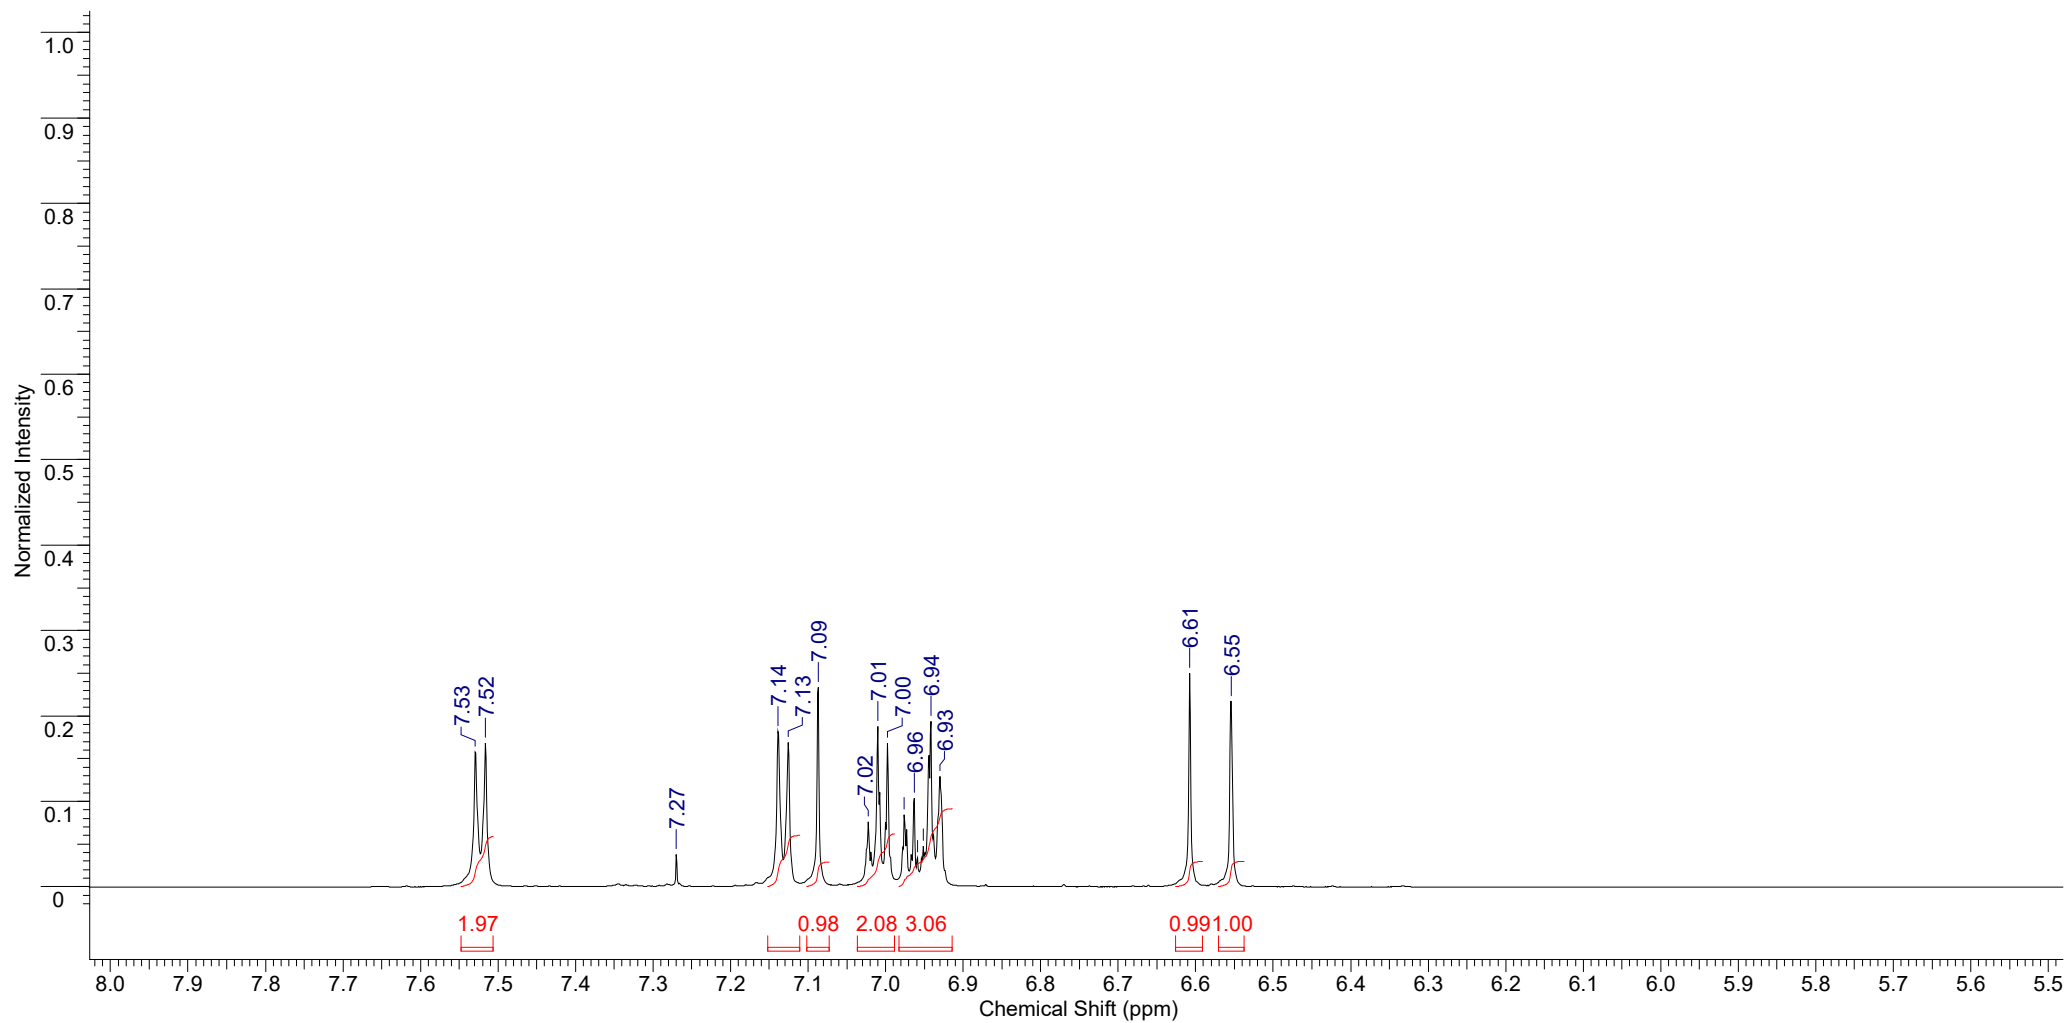

<sup>1</sup>H NMR spectra for 2q.

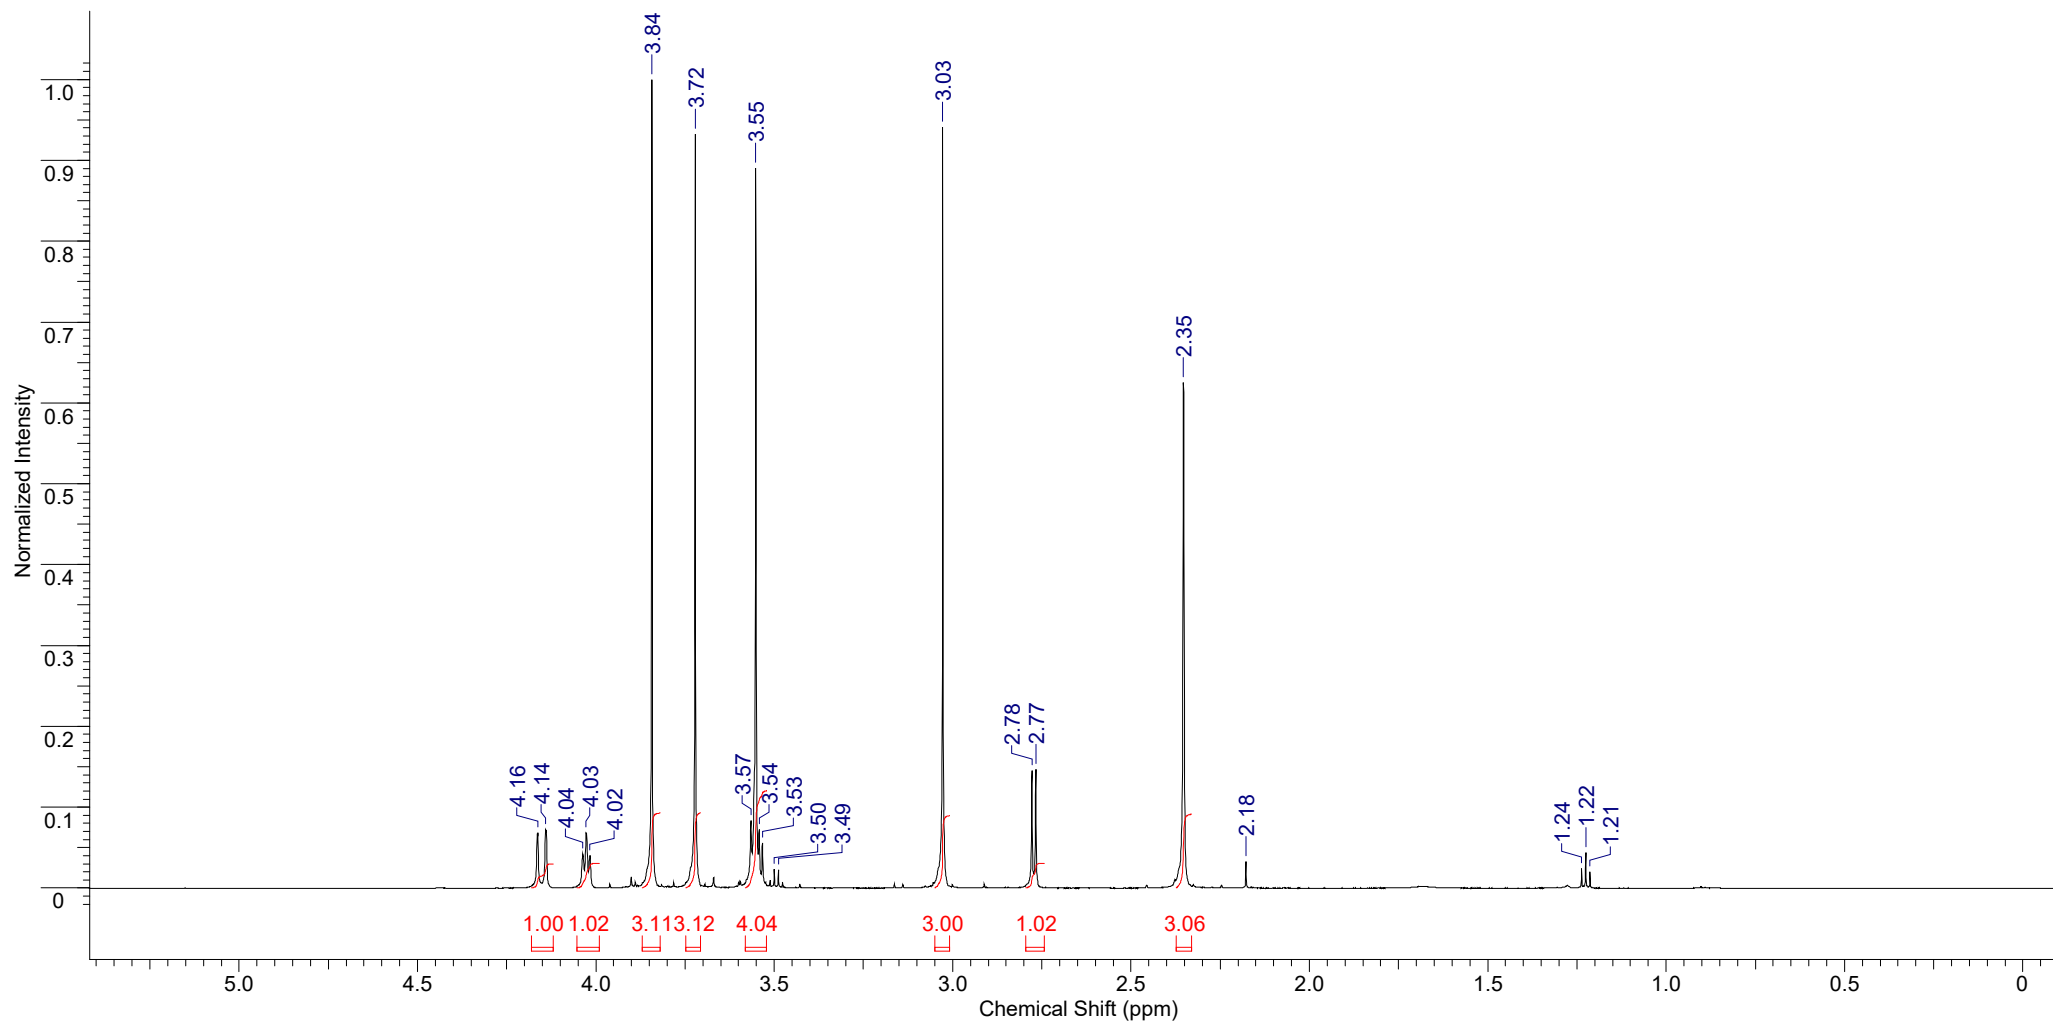

<sup>13</sup>C NMR spectra for 2q.

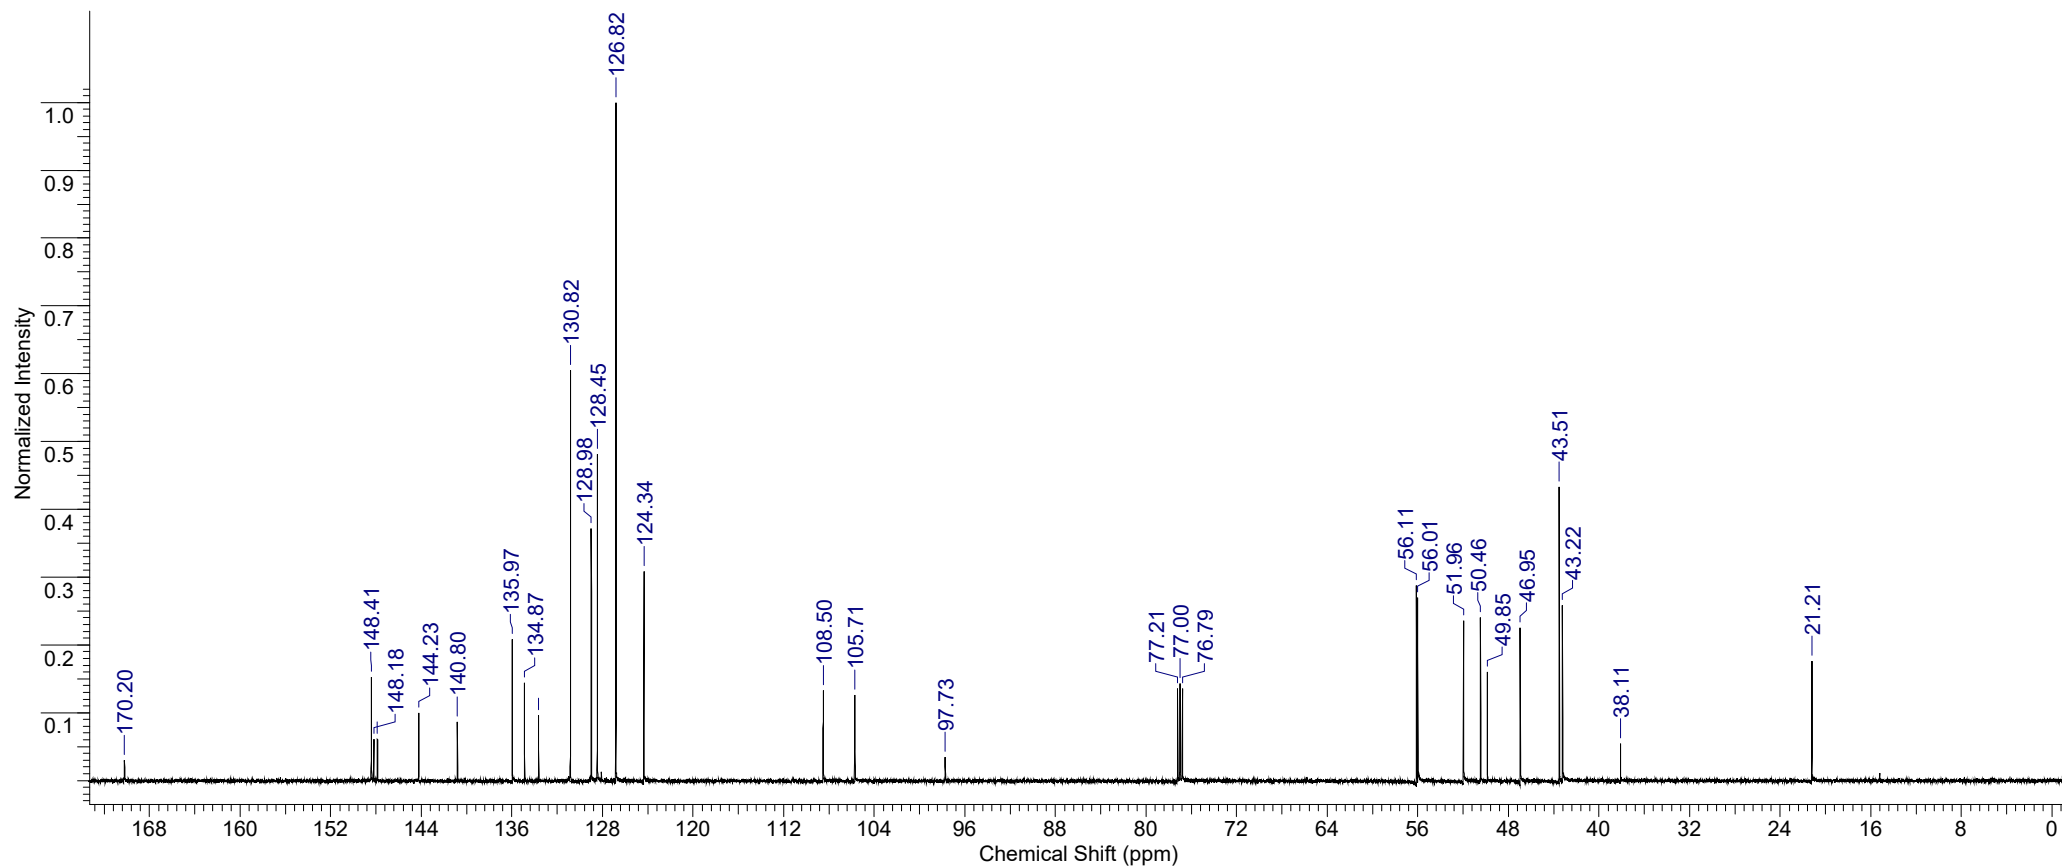

<sup>13</sup>C NMR spectra for 2q.

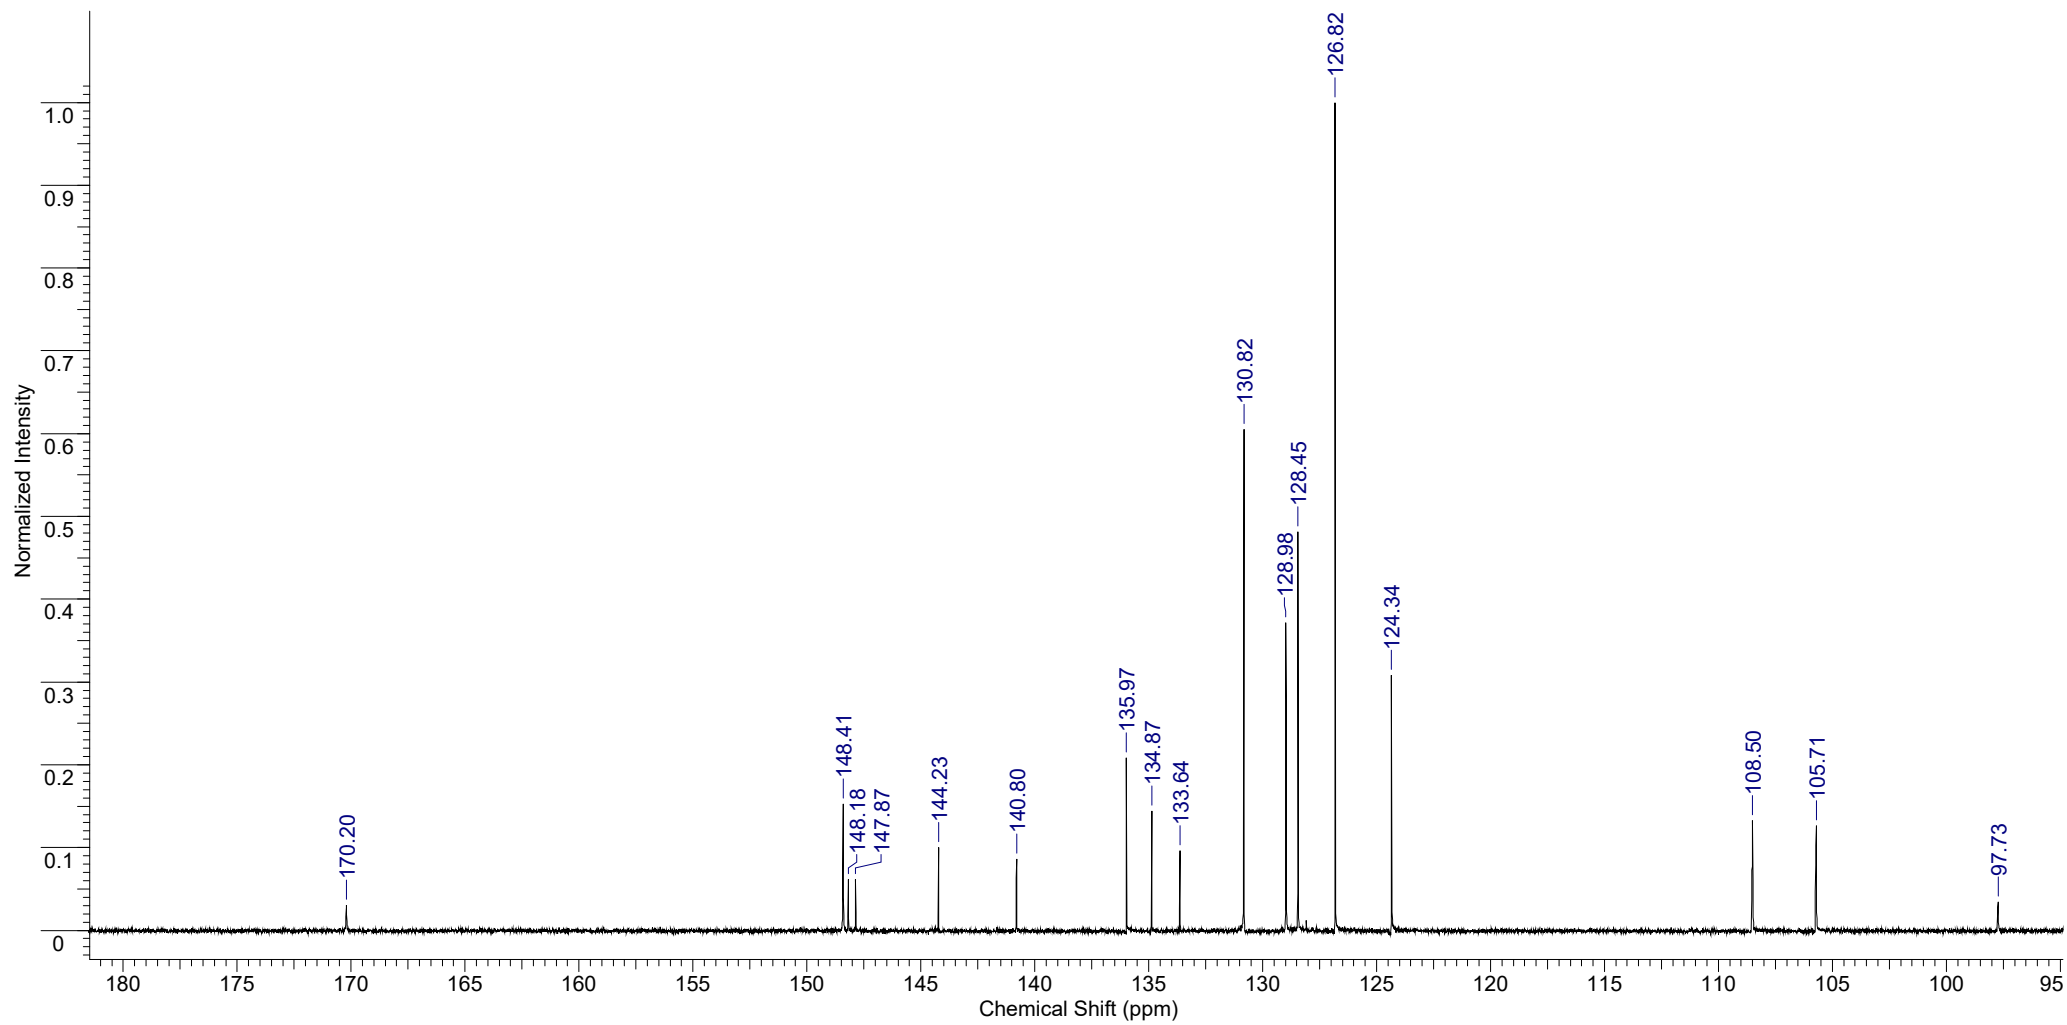



<sup>13</sup>C NMR spectra for 2q.

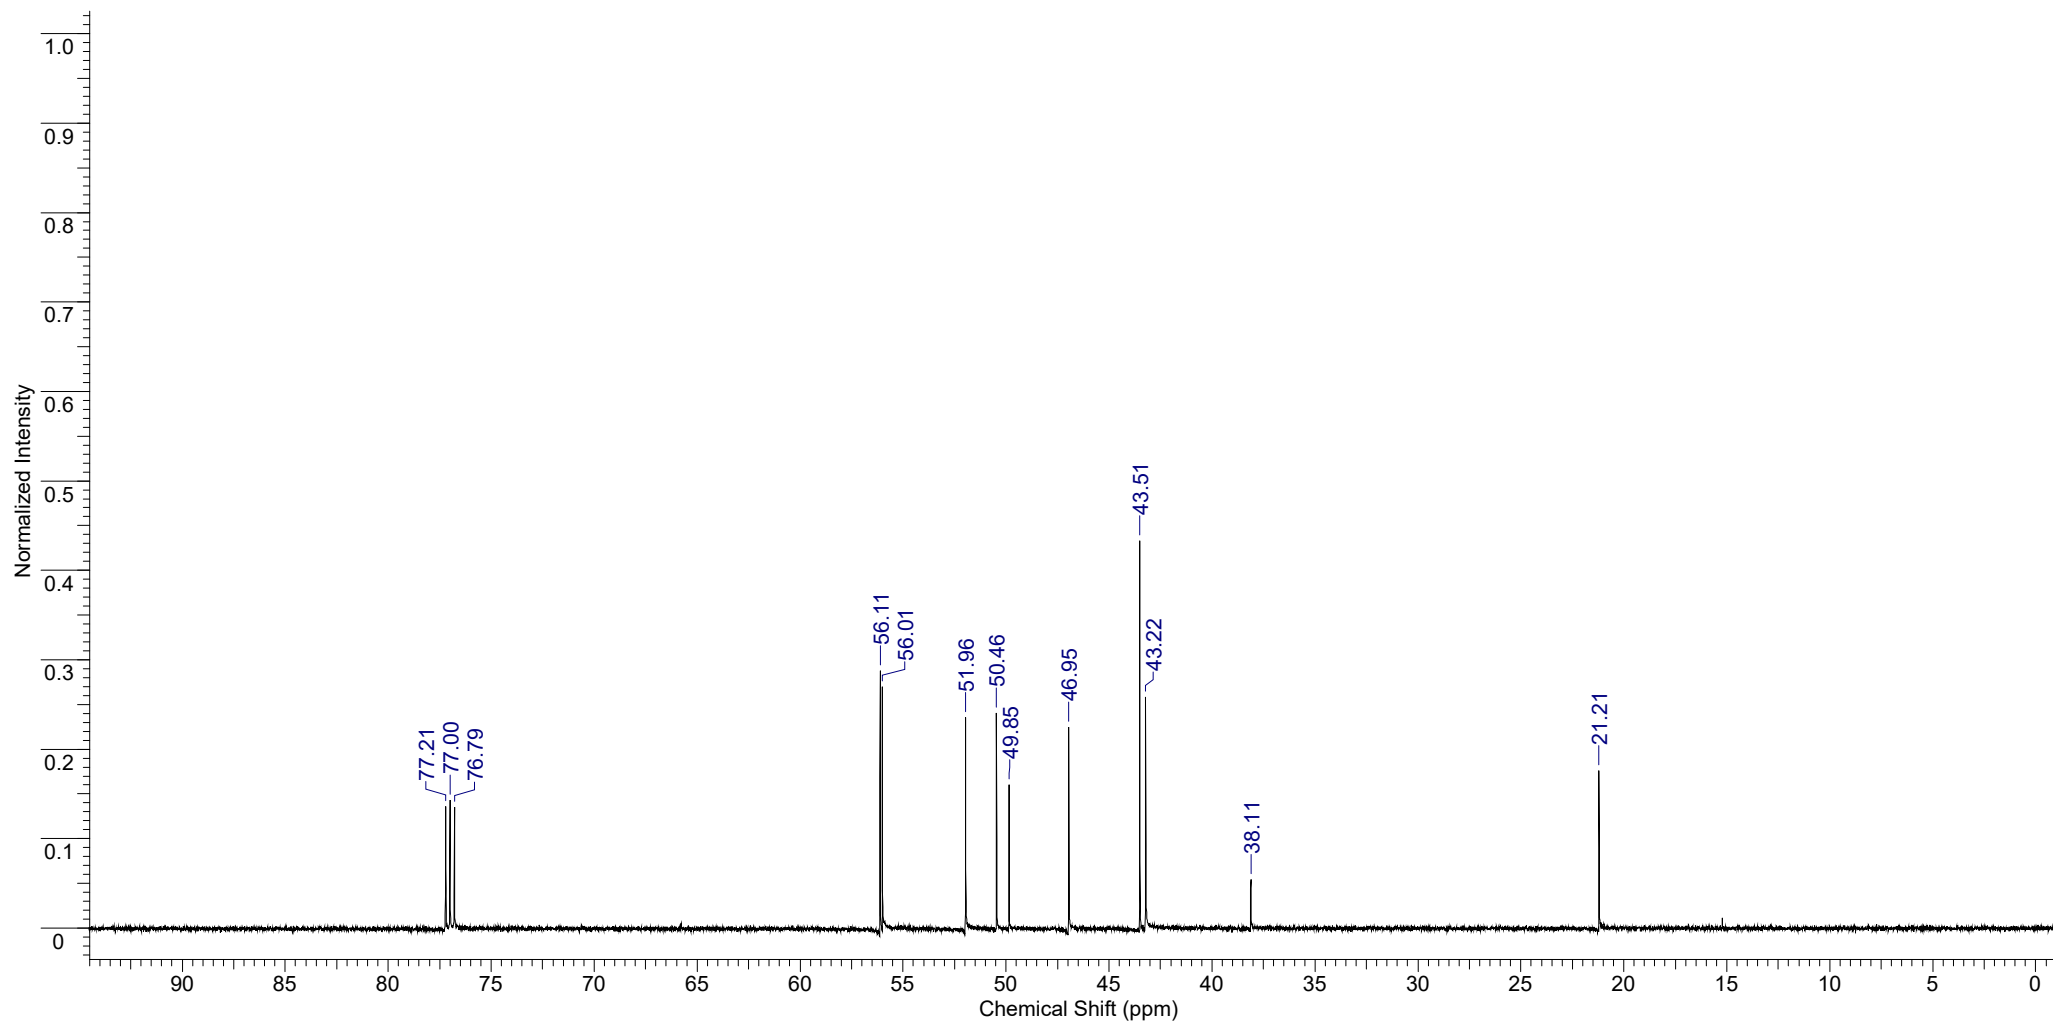

1-[6,7-Dimethoxy-2-methyl-4b-(4-methylphenyl)-4a-phenyl-1,2,4a,4b,8b,8c-hexahydro-2-azabenz[*a*]cyclopropa[*cd*]azulen-4-yl]ethanone (2r)

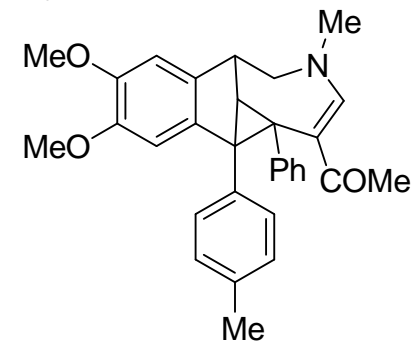

<sup>1</sup>H NMR spectra for 2r.

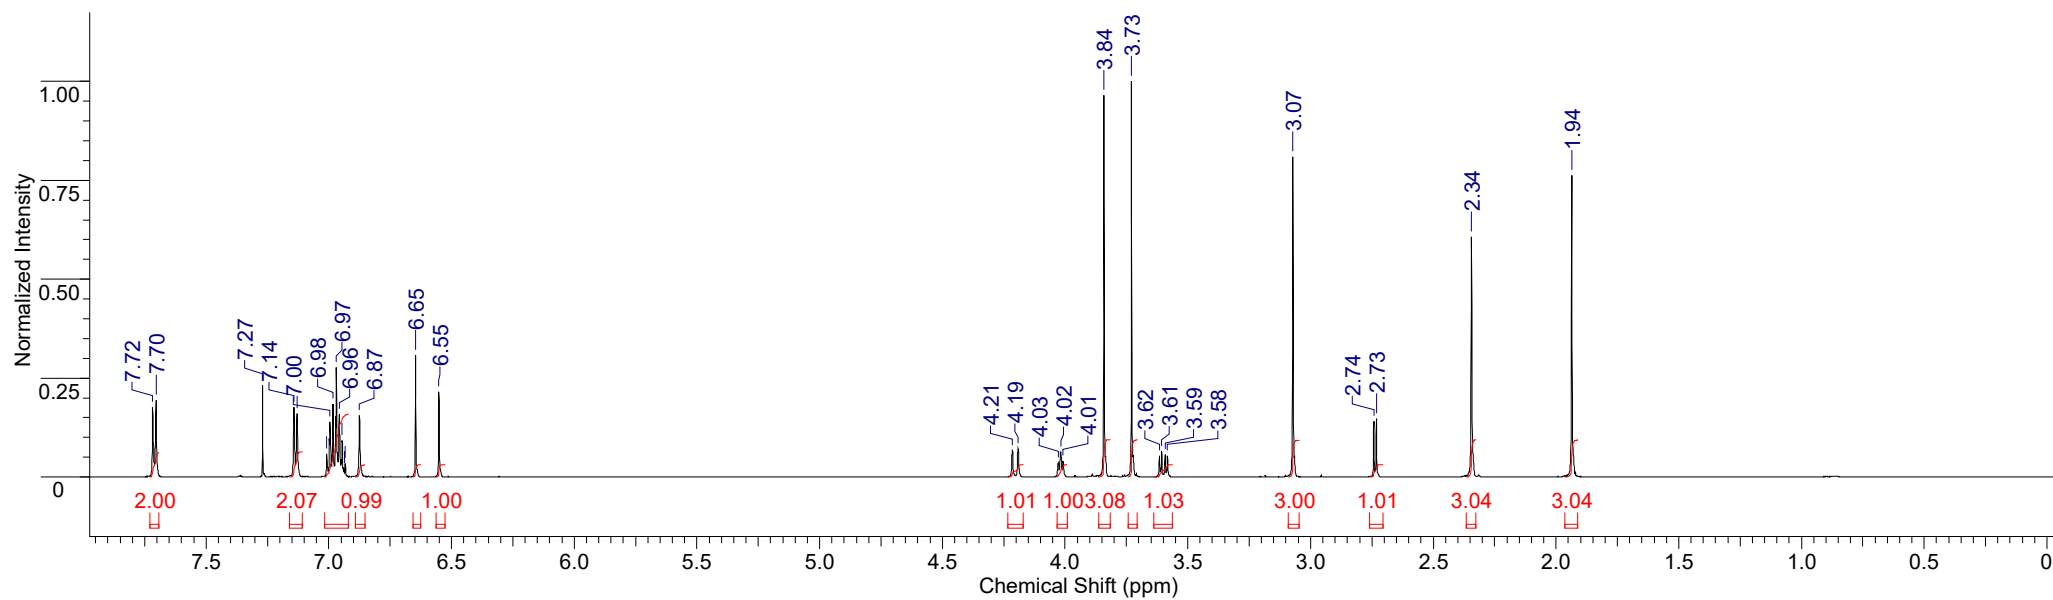

<sup>1</sup>H NMR spectra for 2r.

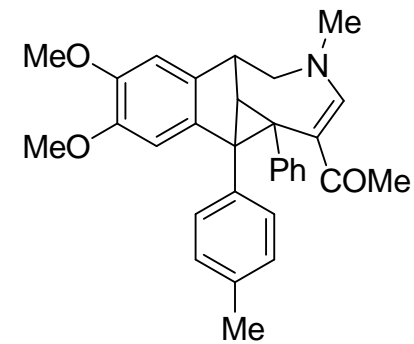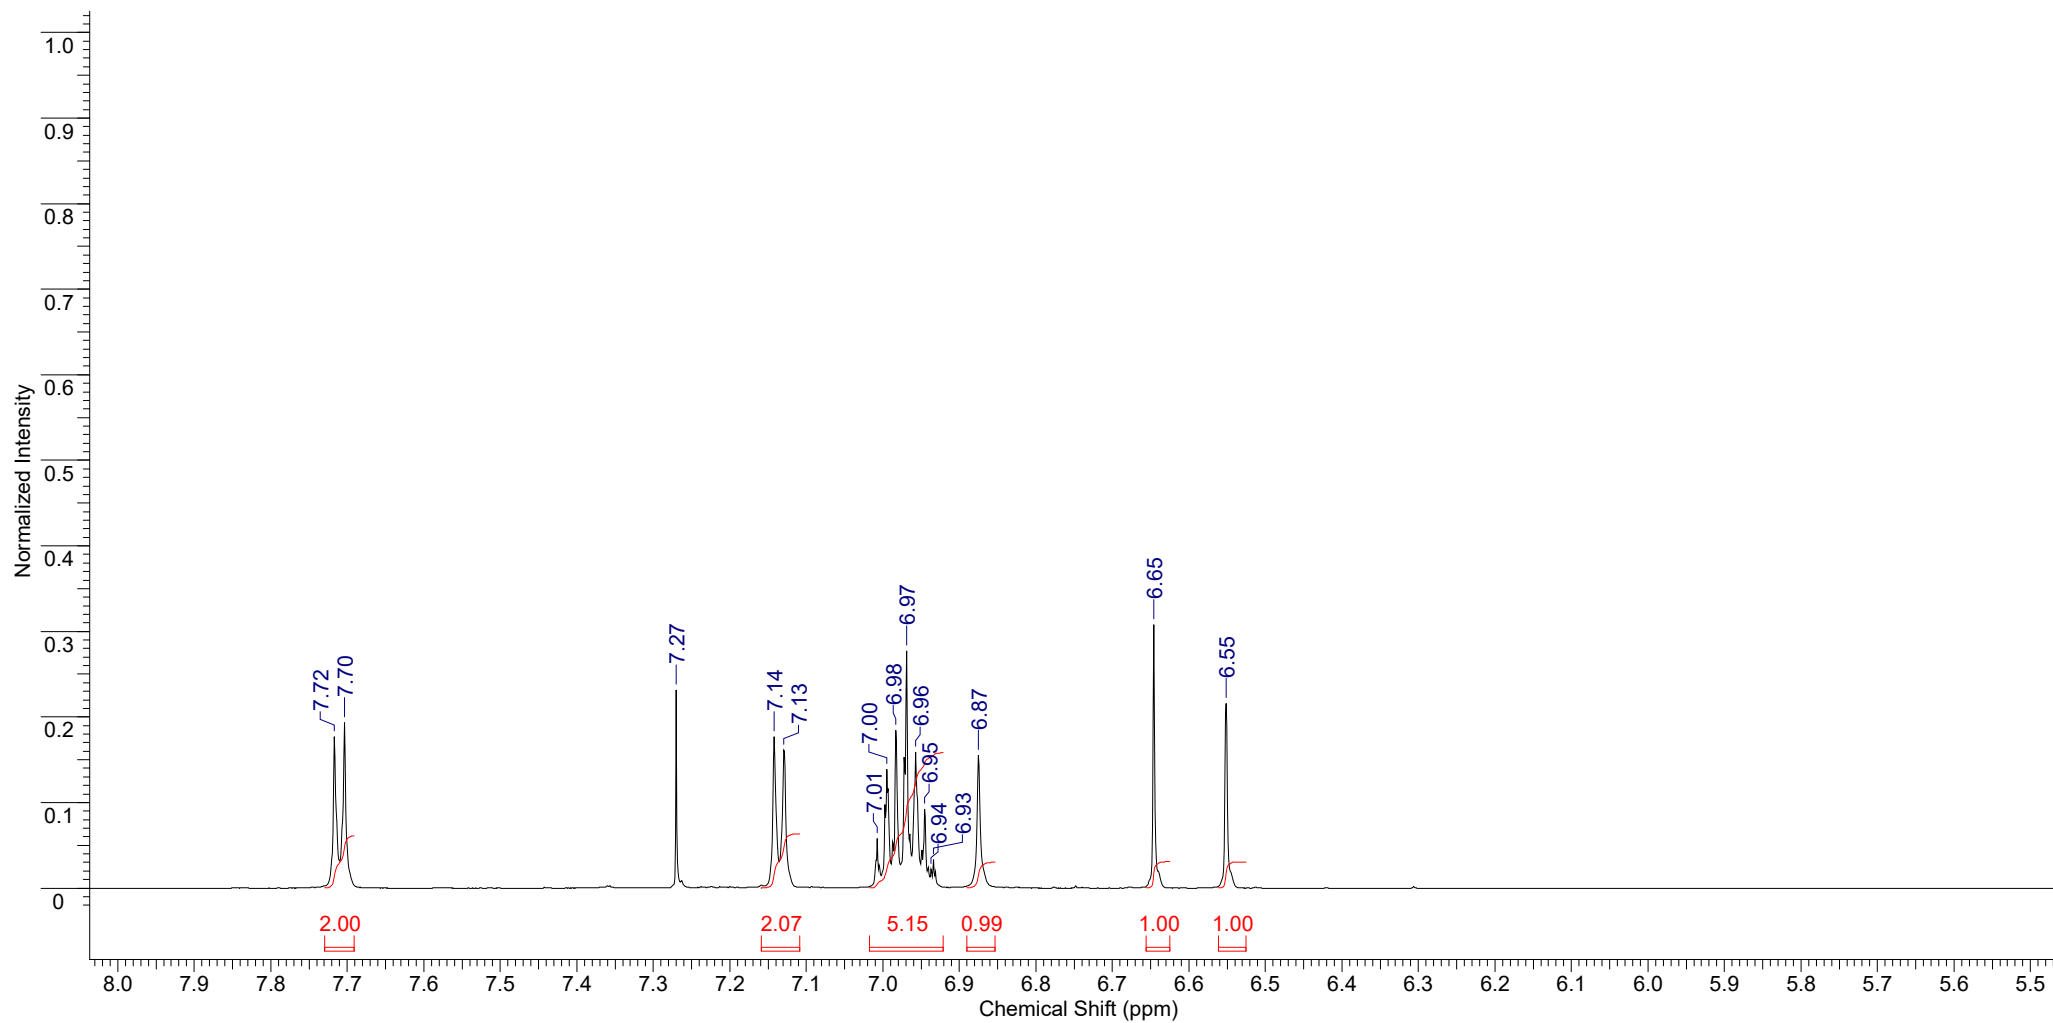

<sup>1</sup>H NMR spectra for 2r.

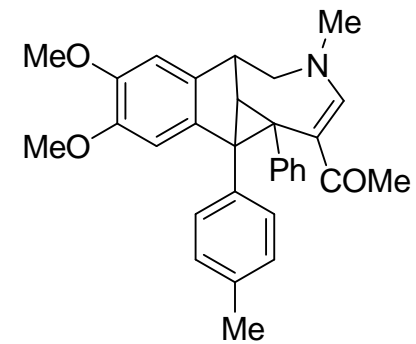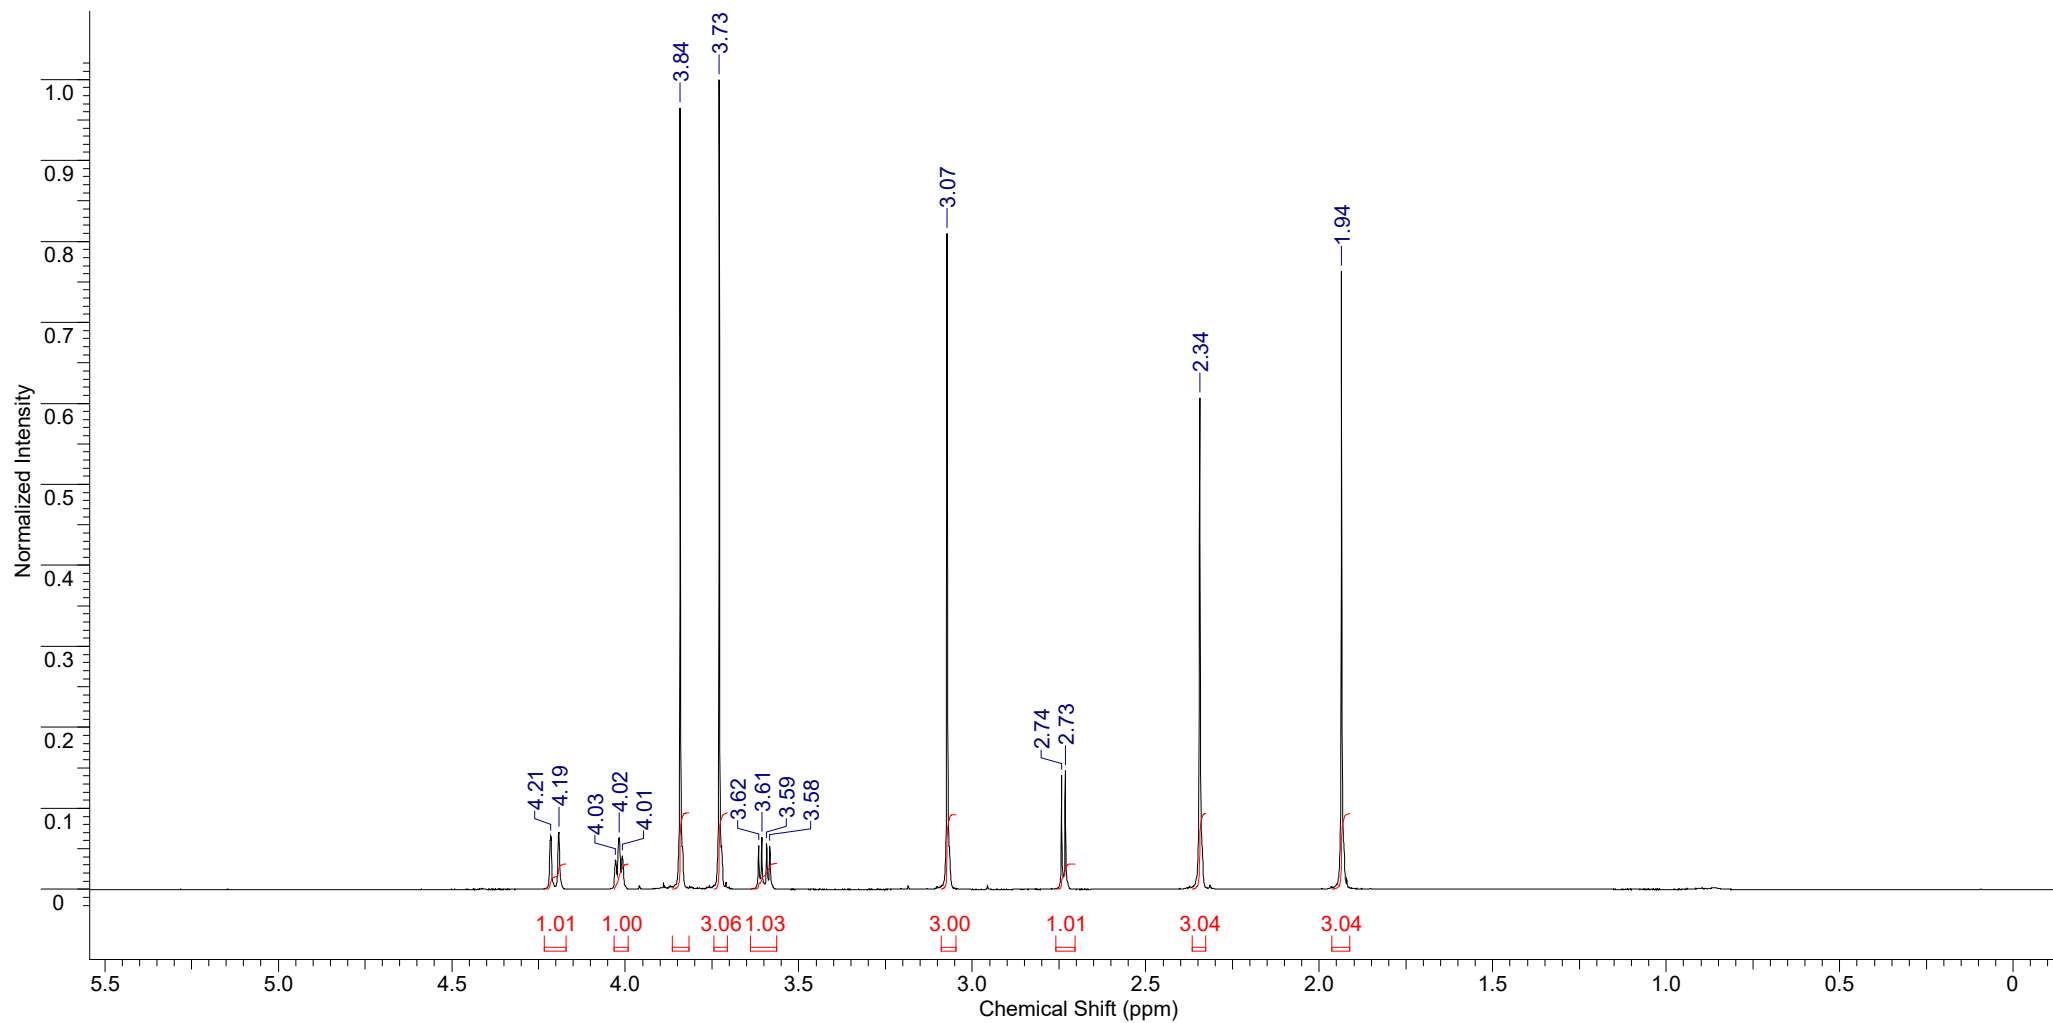

<sup>13</sup>C NMR spectra for 2r.

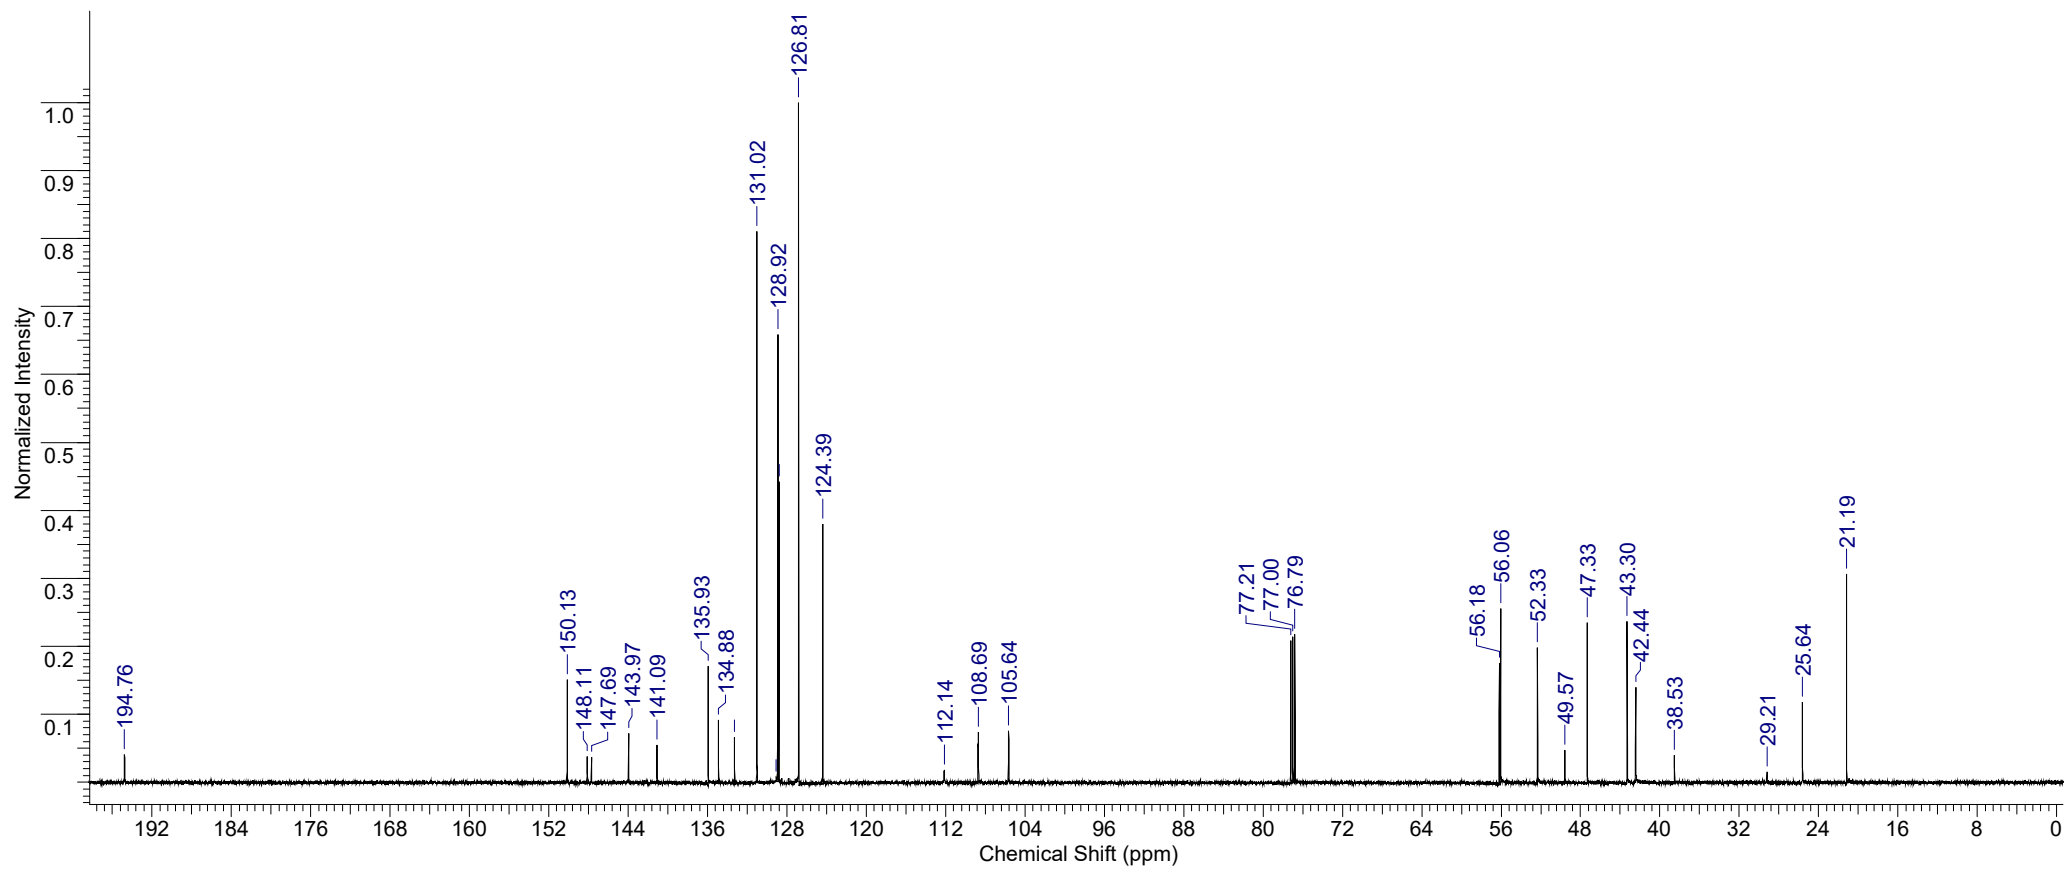

<sup>13</sup>C NMR spectra for 2r.

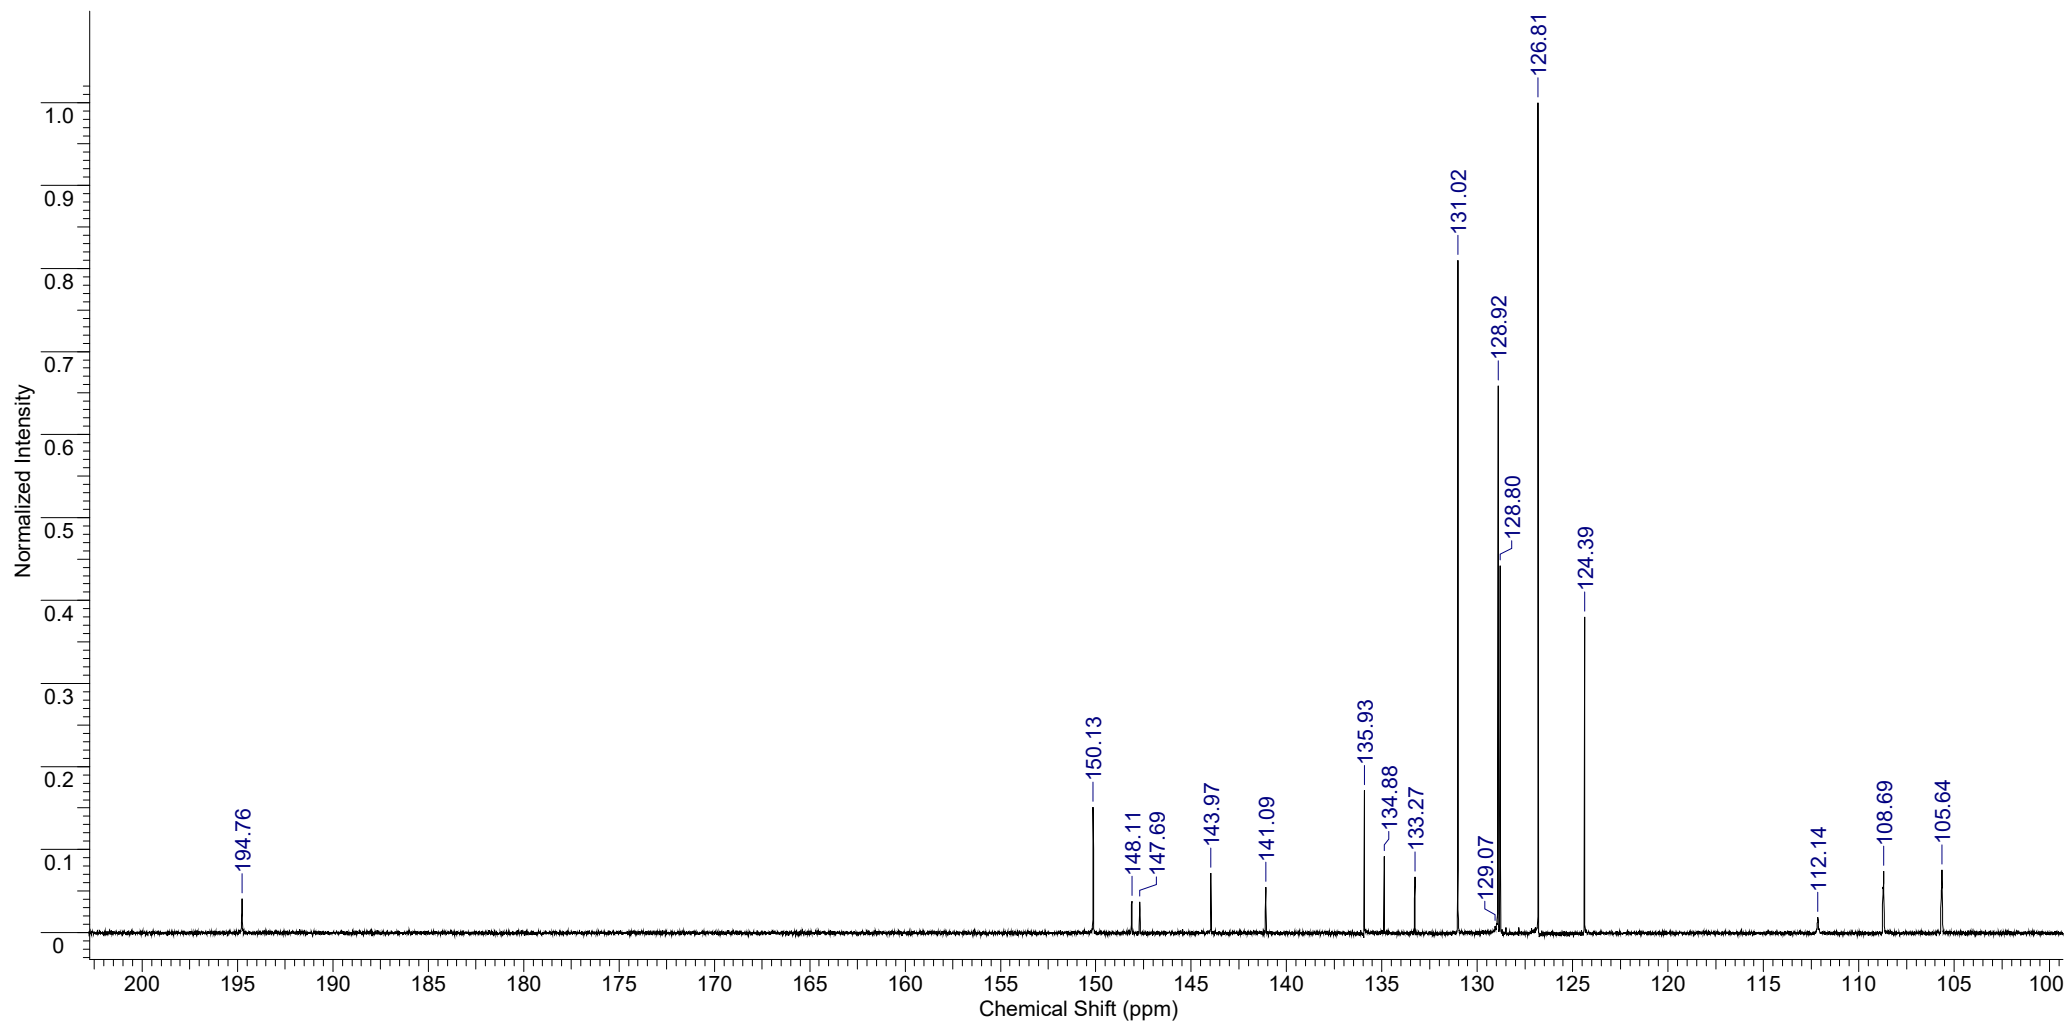

<sup>13</sup>C NMR spectra for 2r.

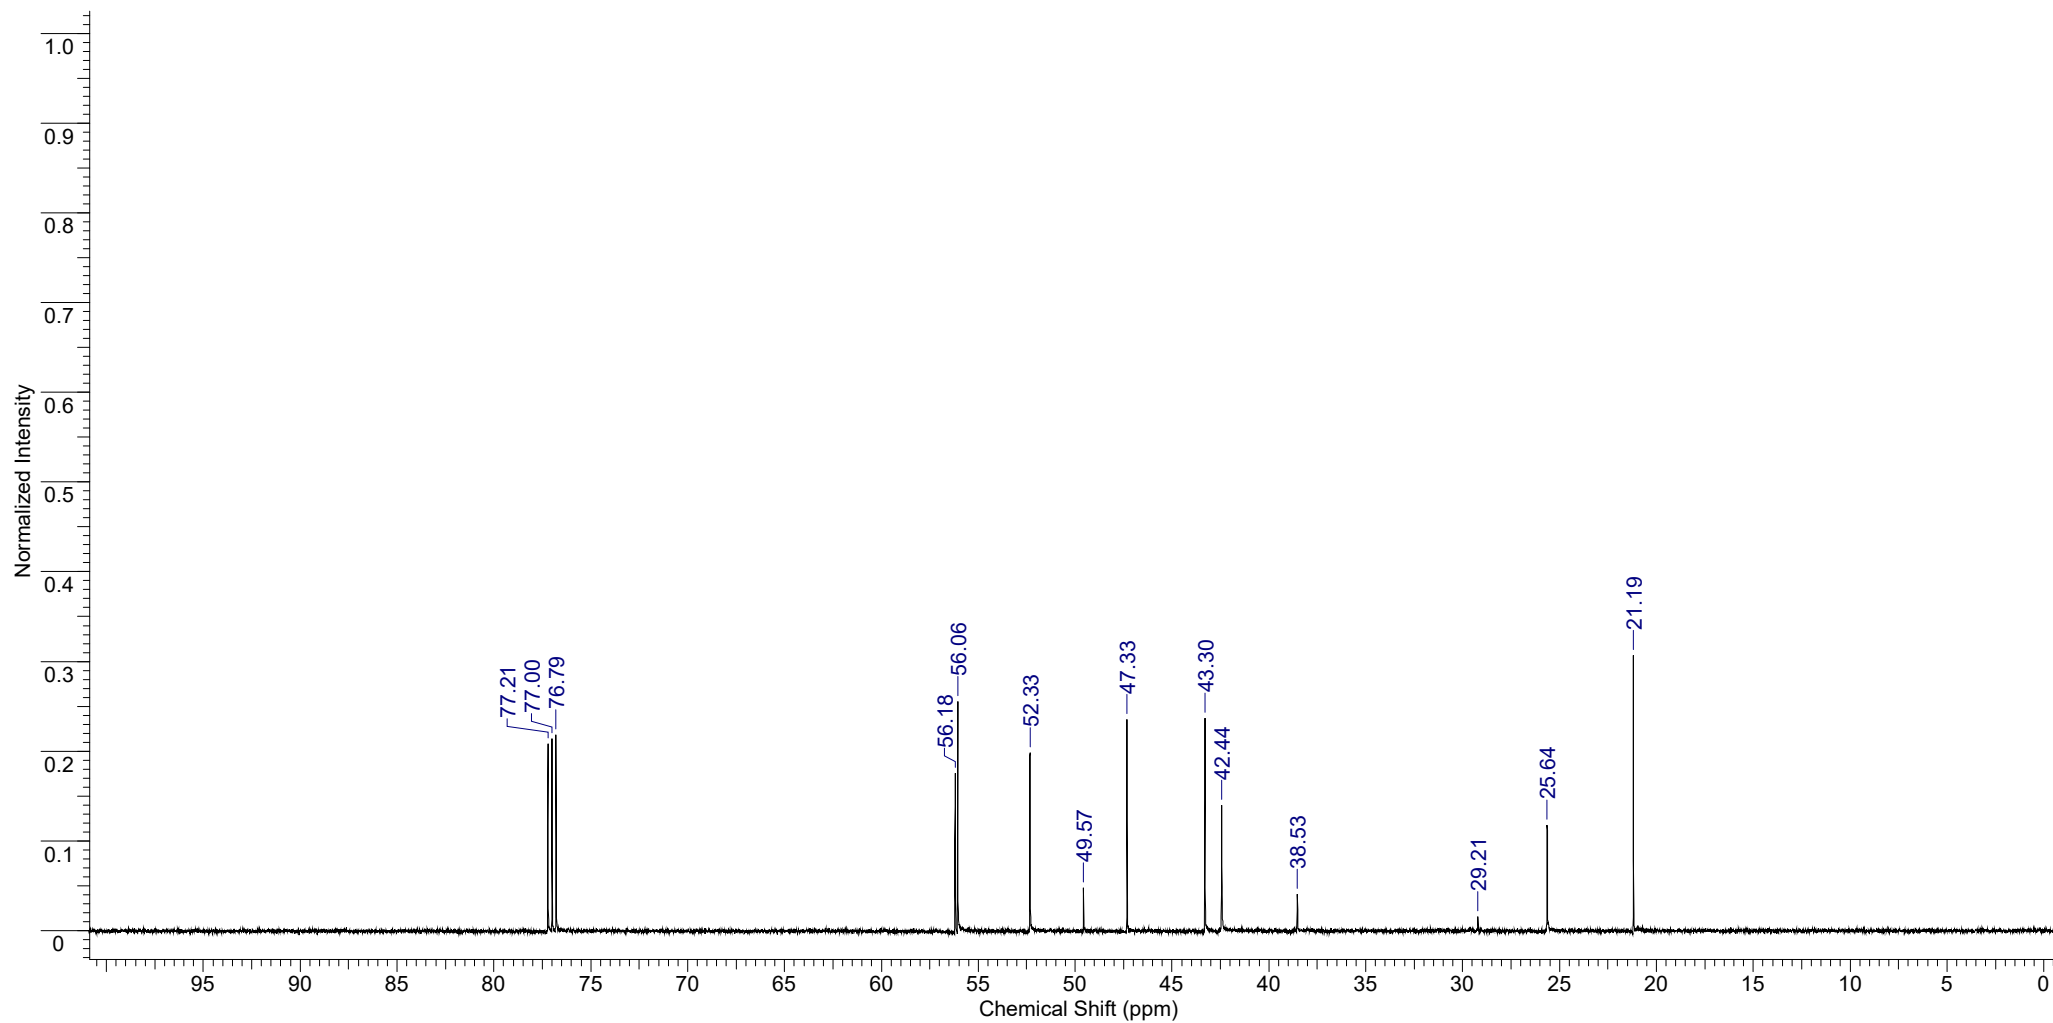

Methyl 6,7-dimethoxy-2-methyl-4b-(4-nitrophenyl)-4a-phenyl-1,2,4a,4b,8b,8c-hexahydro-2-azabenzocyclopropa[cd]azulene-4-carboxylate (2s)

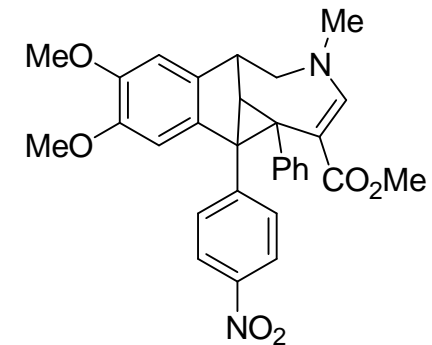

<sup>1</sup>H NMR spectra for 2s.

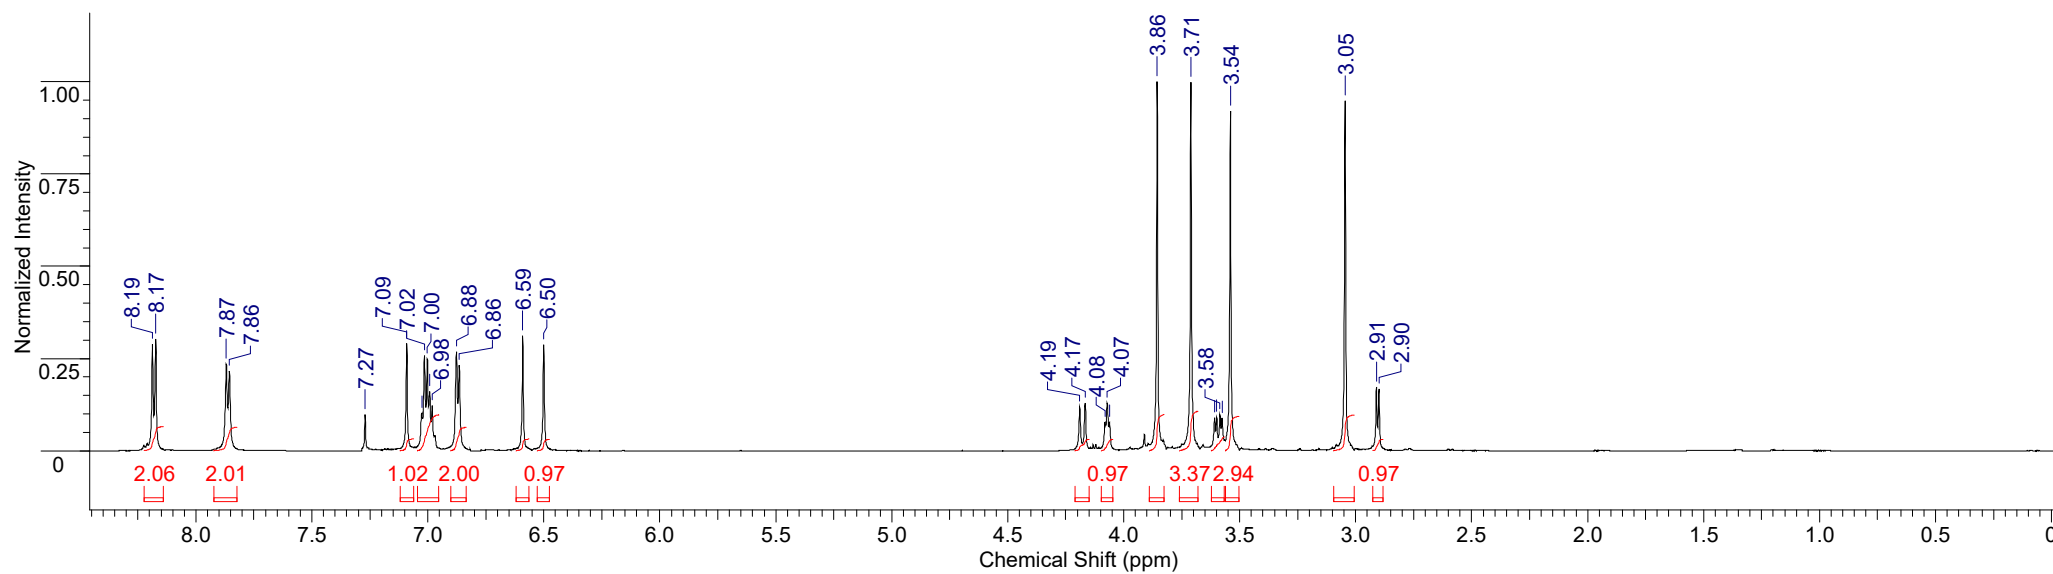



<sup>1</sup>H NMR spectra for 2s.

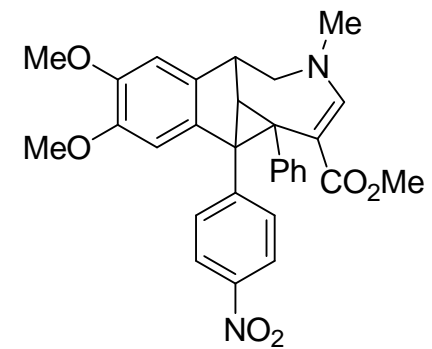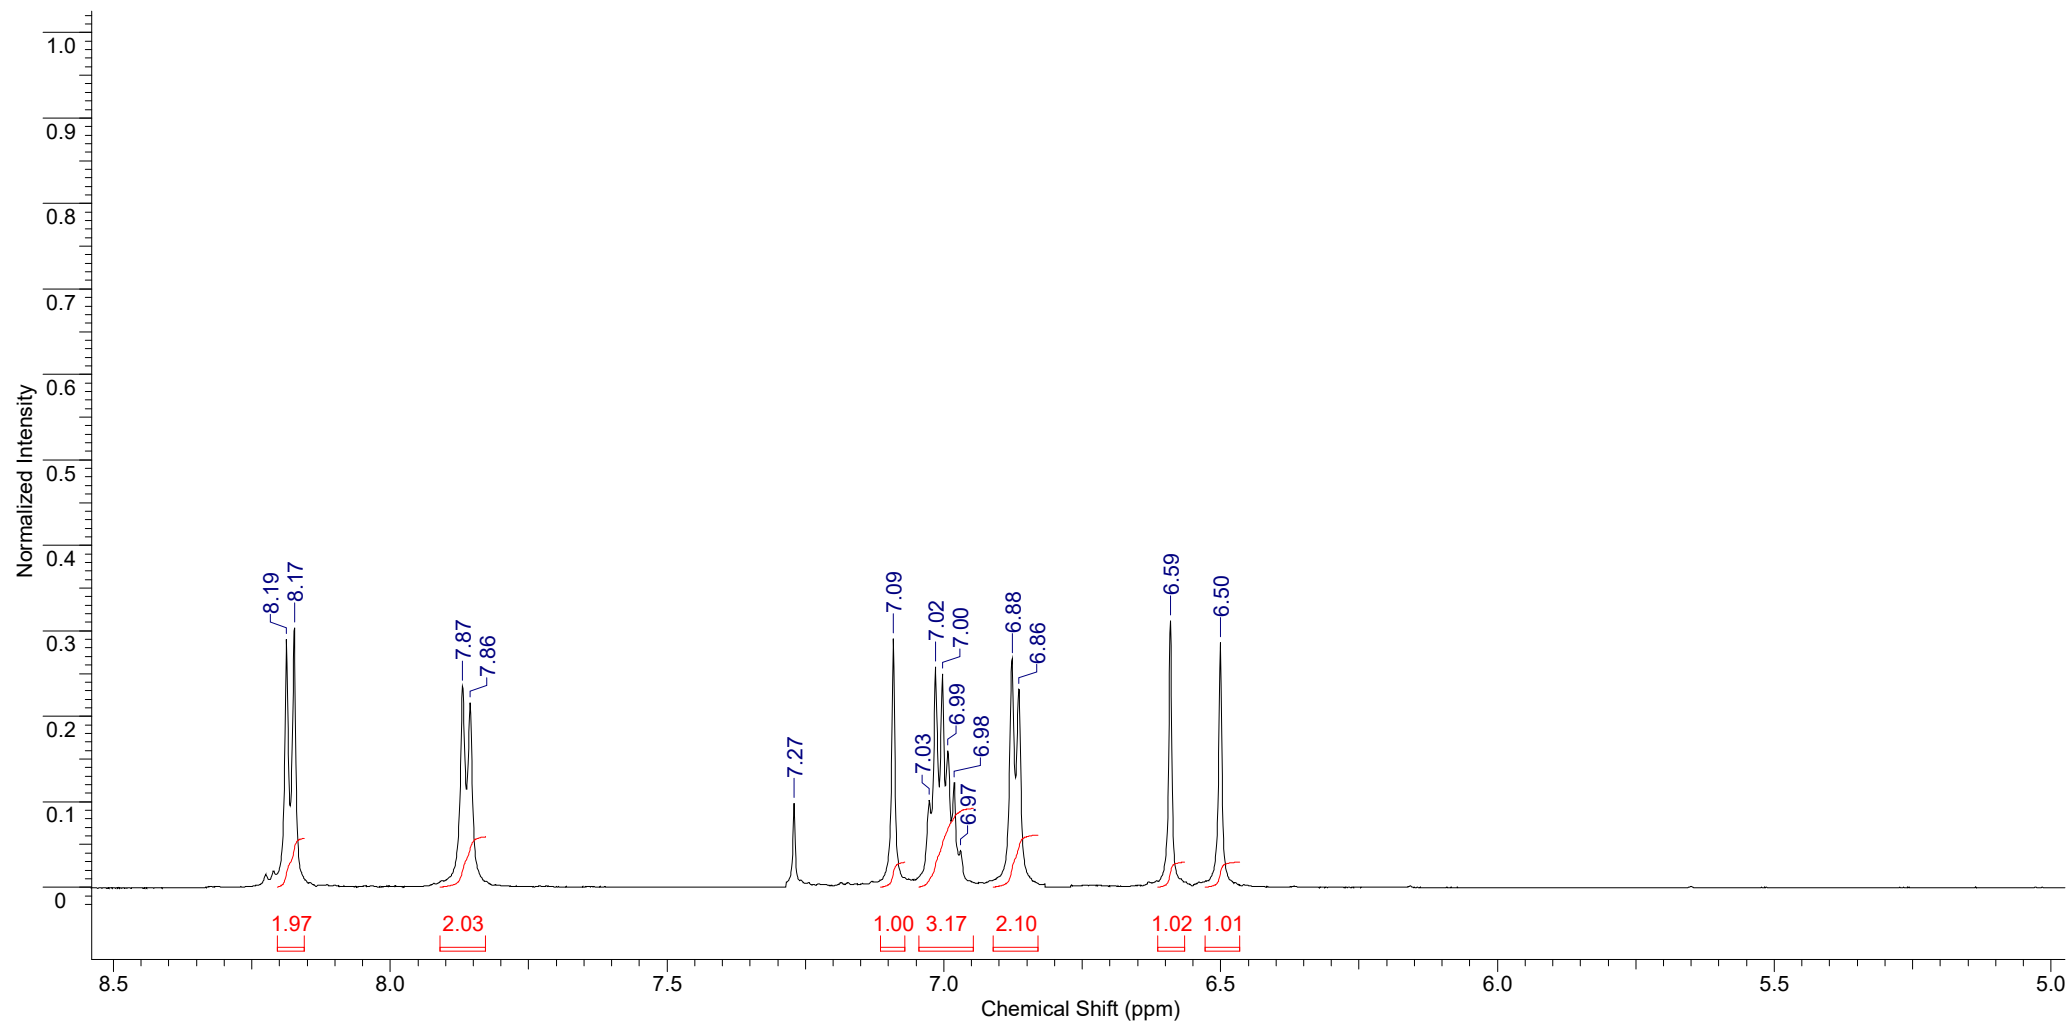

<sup>1</sup>H NMR spectra for 2s.

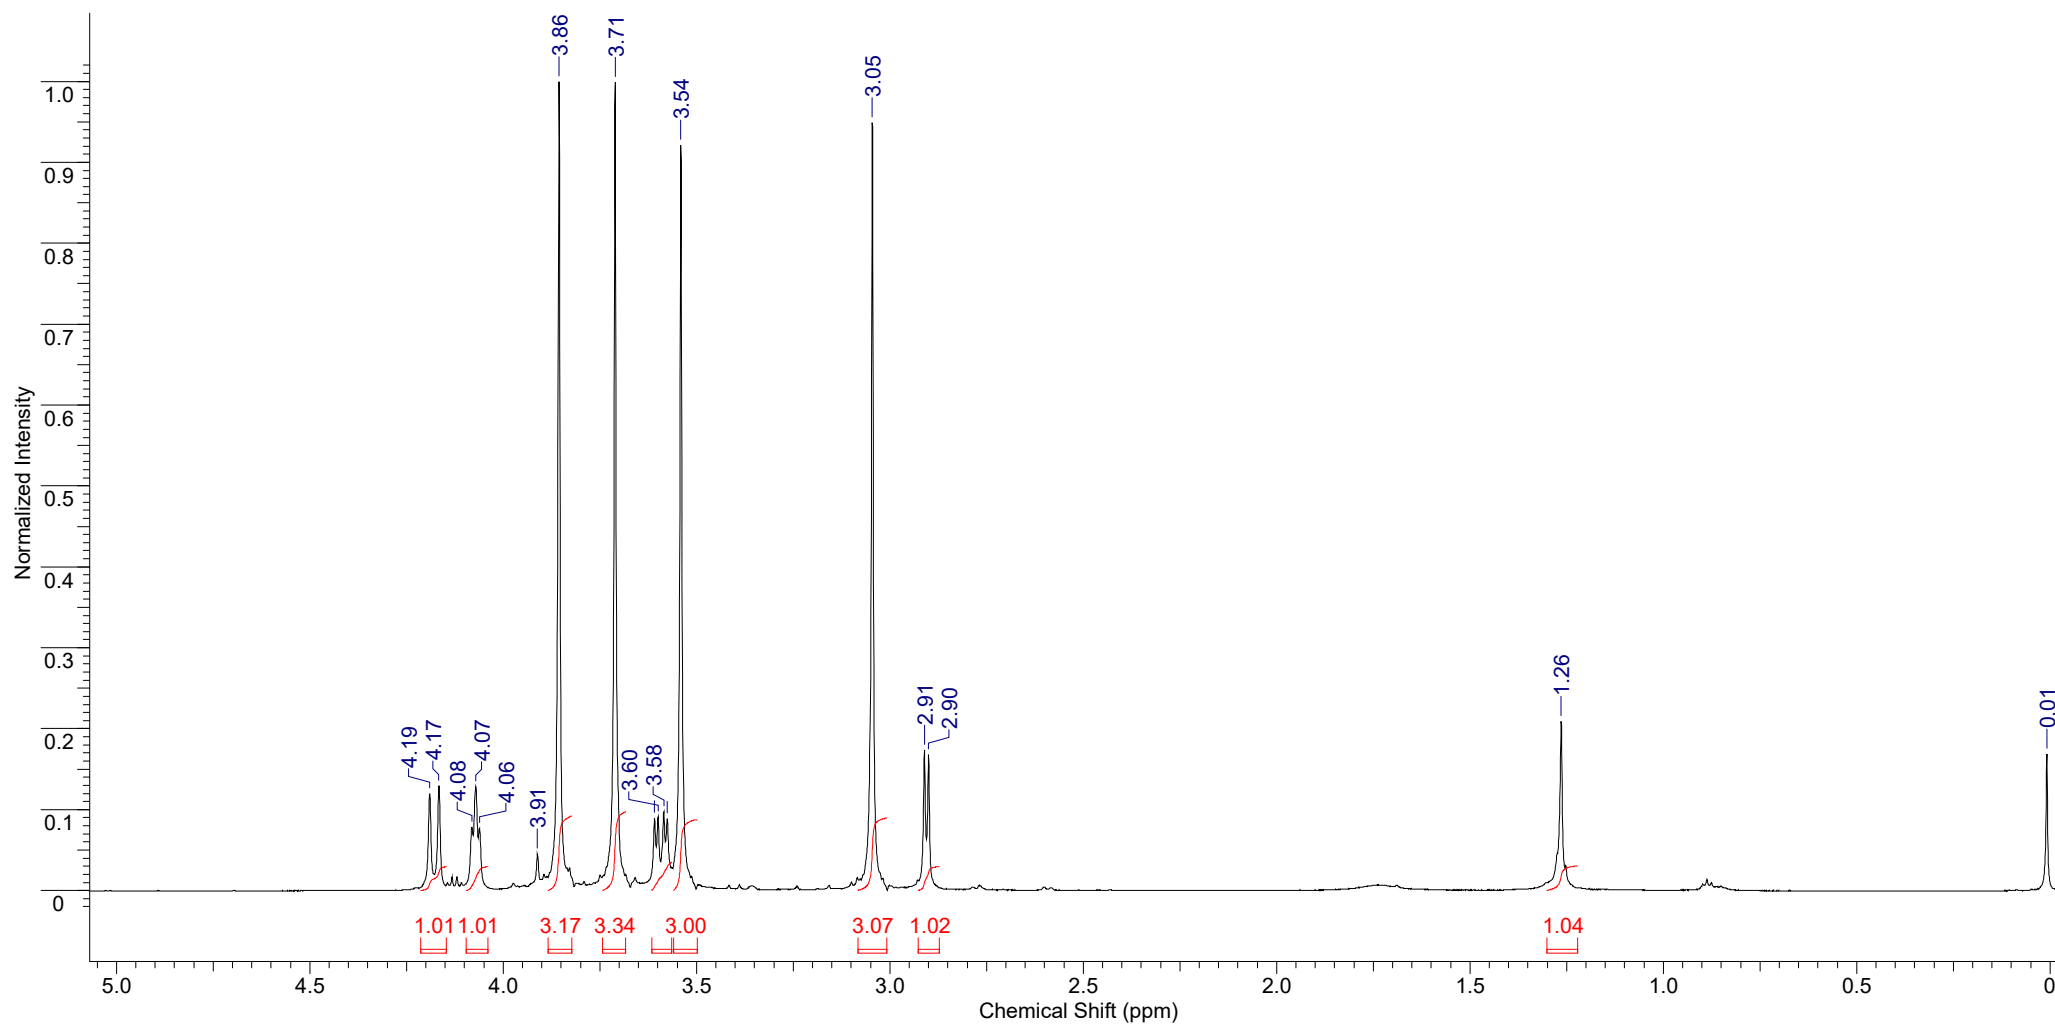

<sup>13</sup>C NMR spectra for 2s.

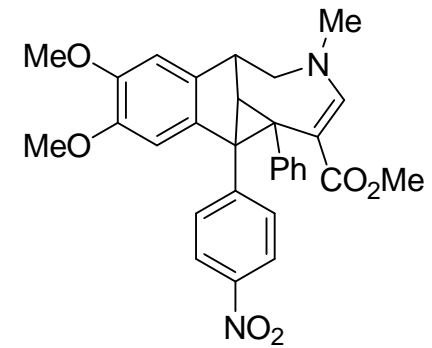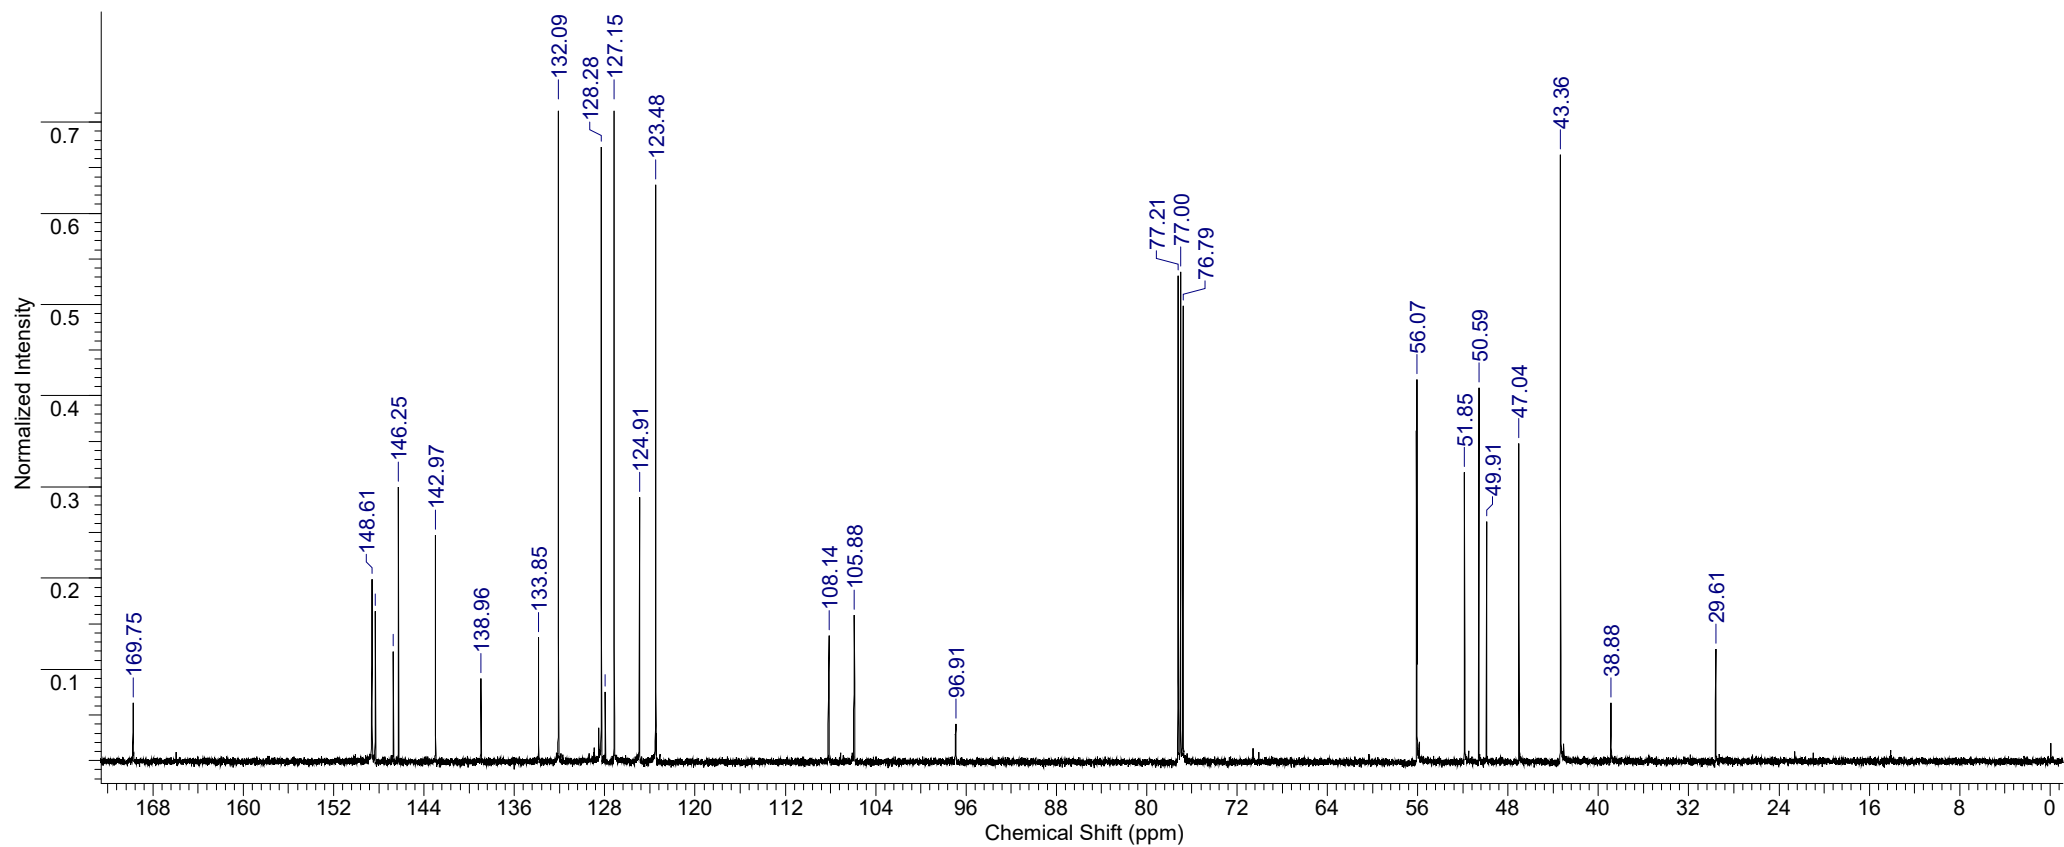

<sup>13</sup>C NMR spectra for 2s.

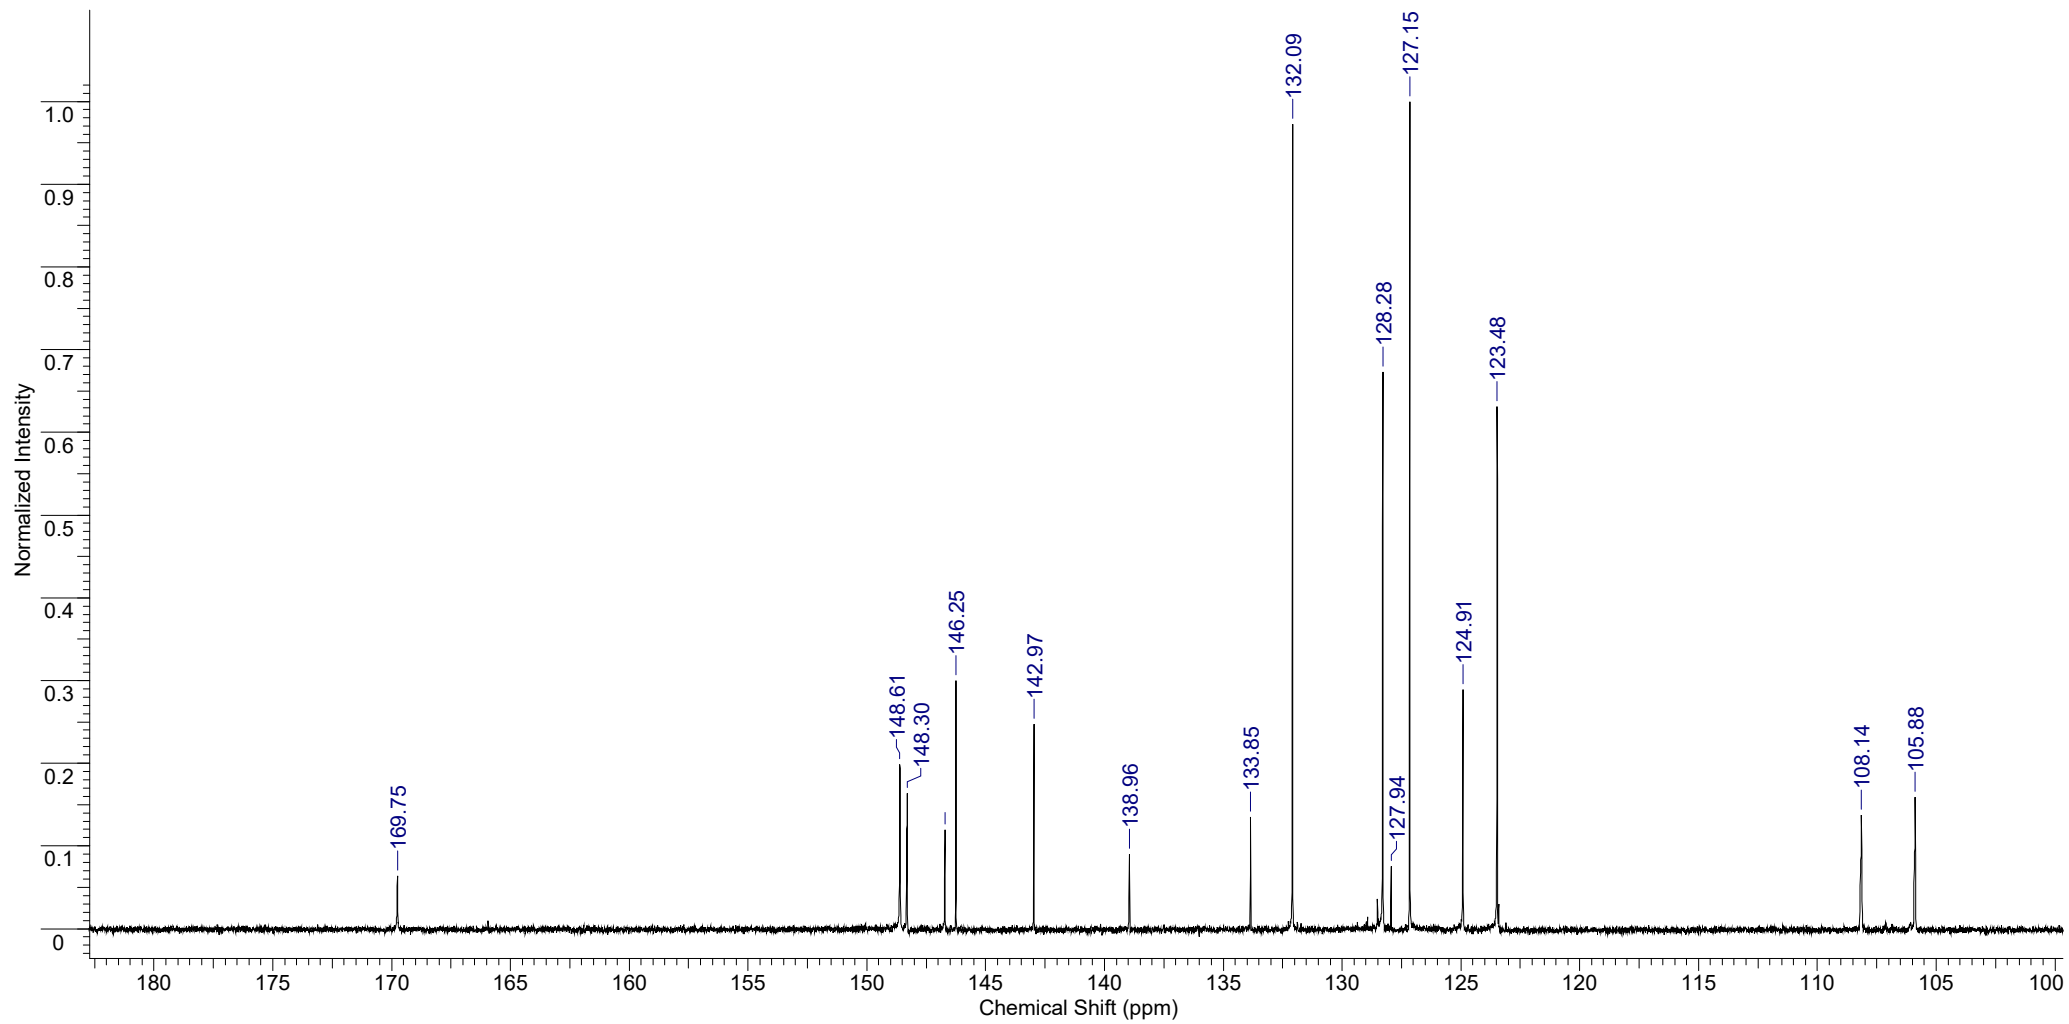

<sup>13</sup>C NMR spectra for 2s.

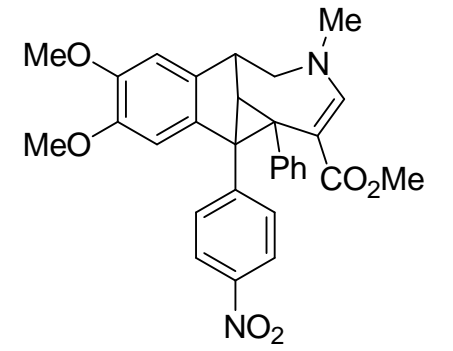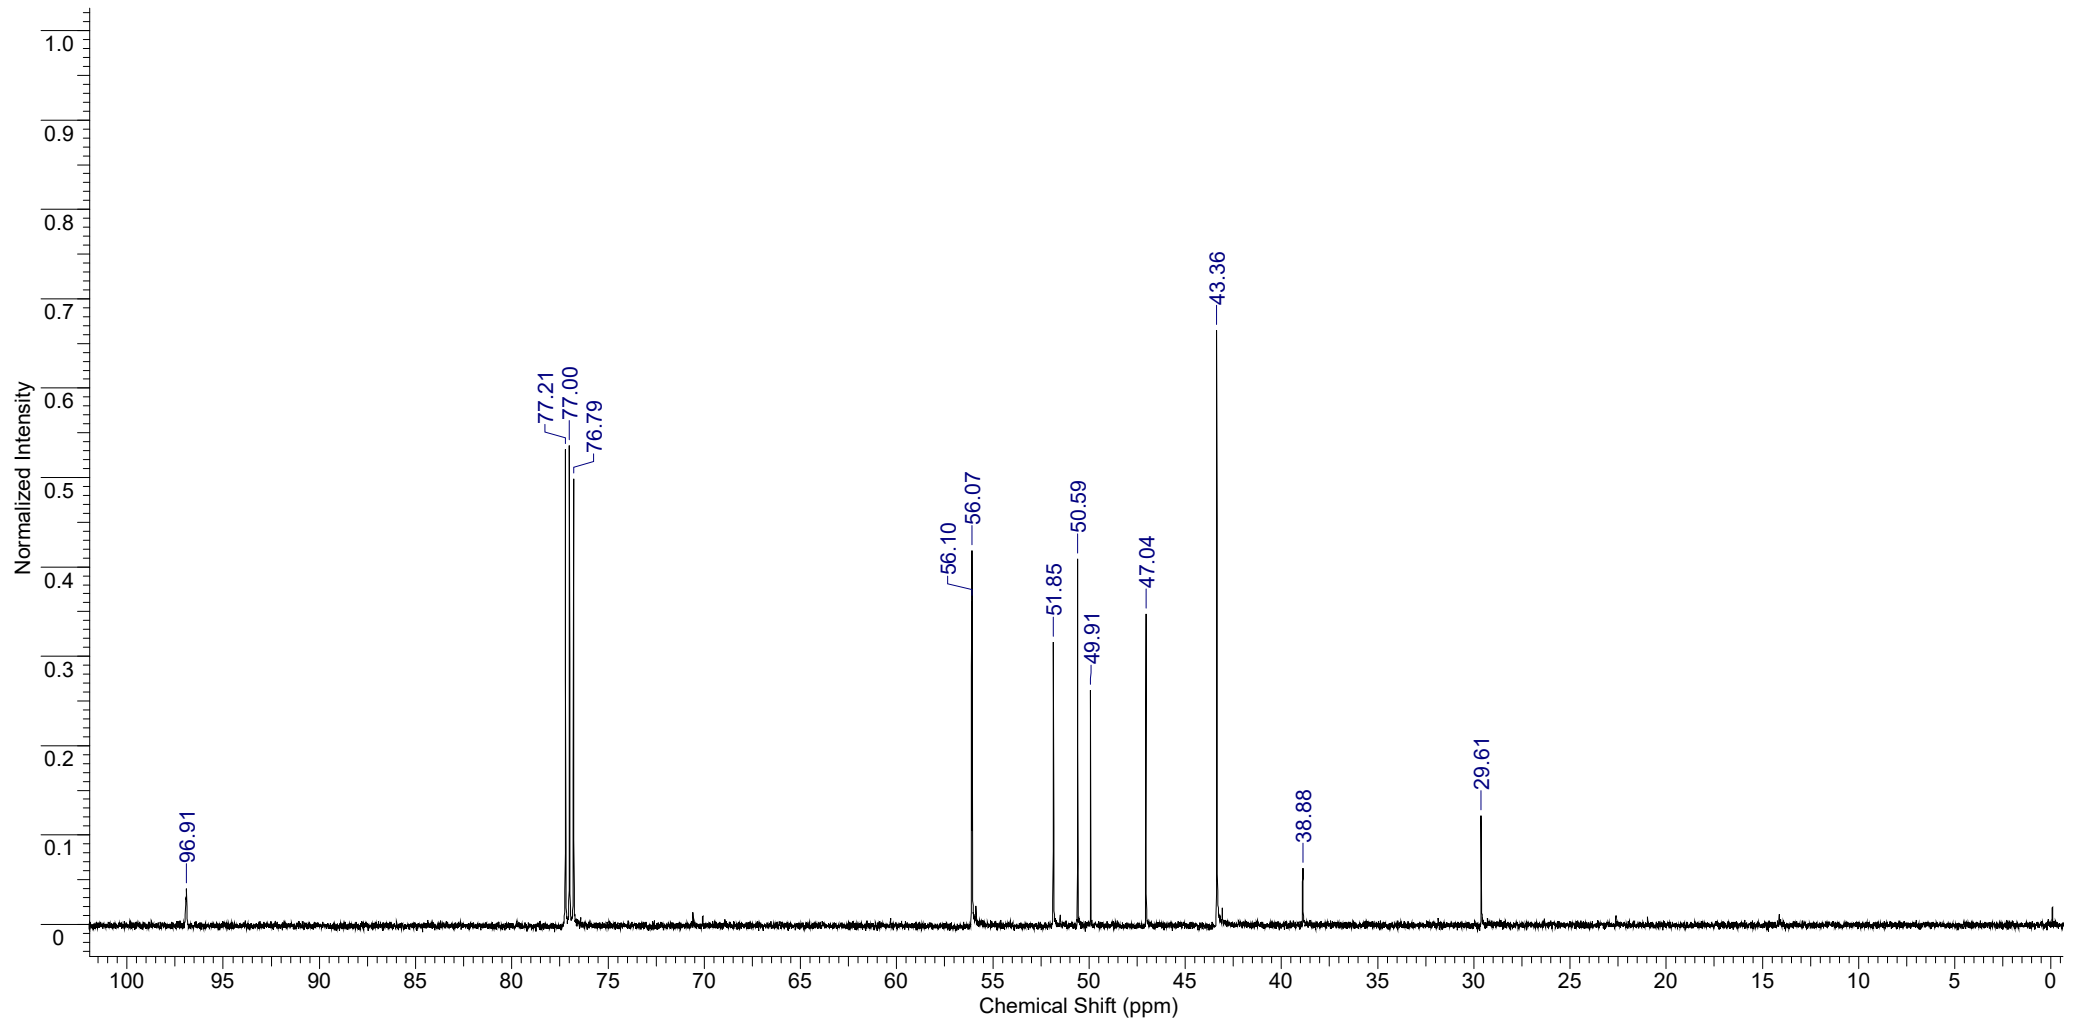

1-[6,7-Dimethoxy-2-methyl-4b-(4-nitrophenyl)-4a-phenyl-1,2,4a,4b,8b,8c-hexahydro-2-azabenz[a]cyclopropa[cd]azulen-4-yl]ethanone (2t)

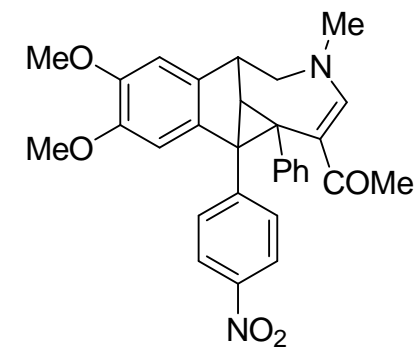

<sup>1</sup>H NMR spectra for 2t.

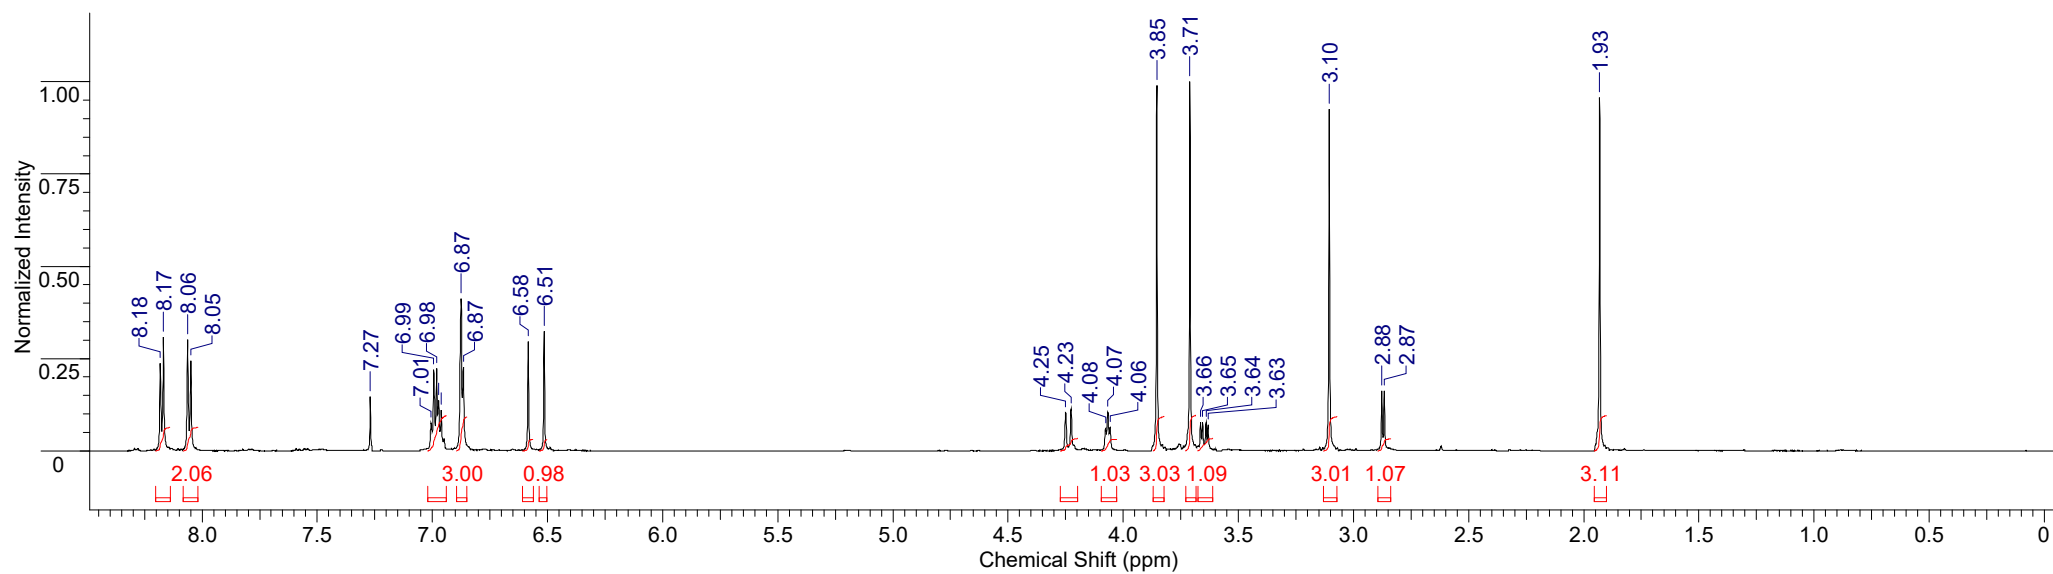

<sup>1</sup>H NMR spectra for 2t.

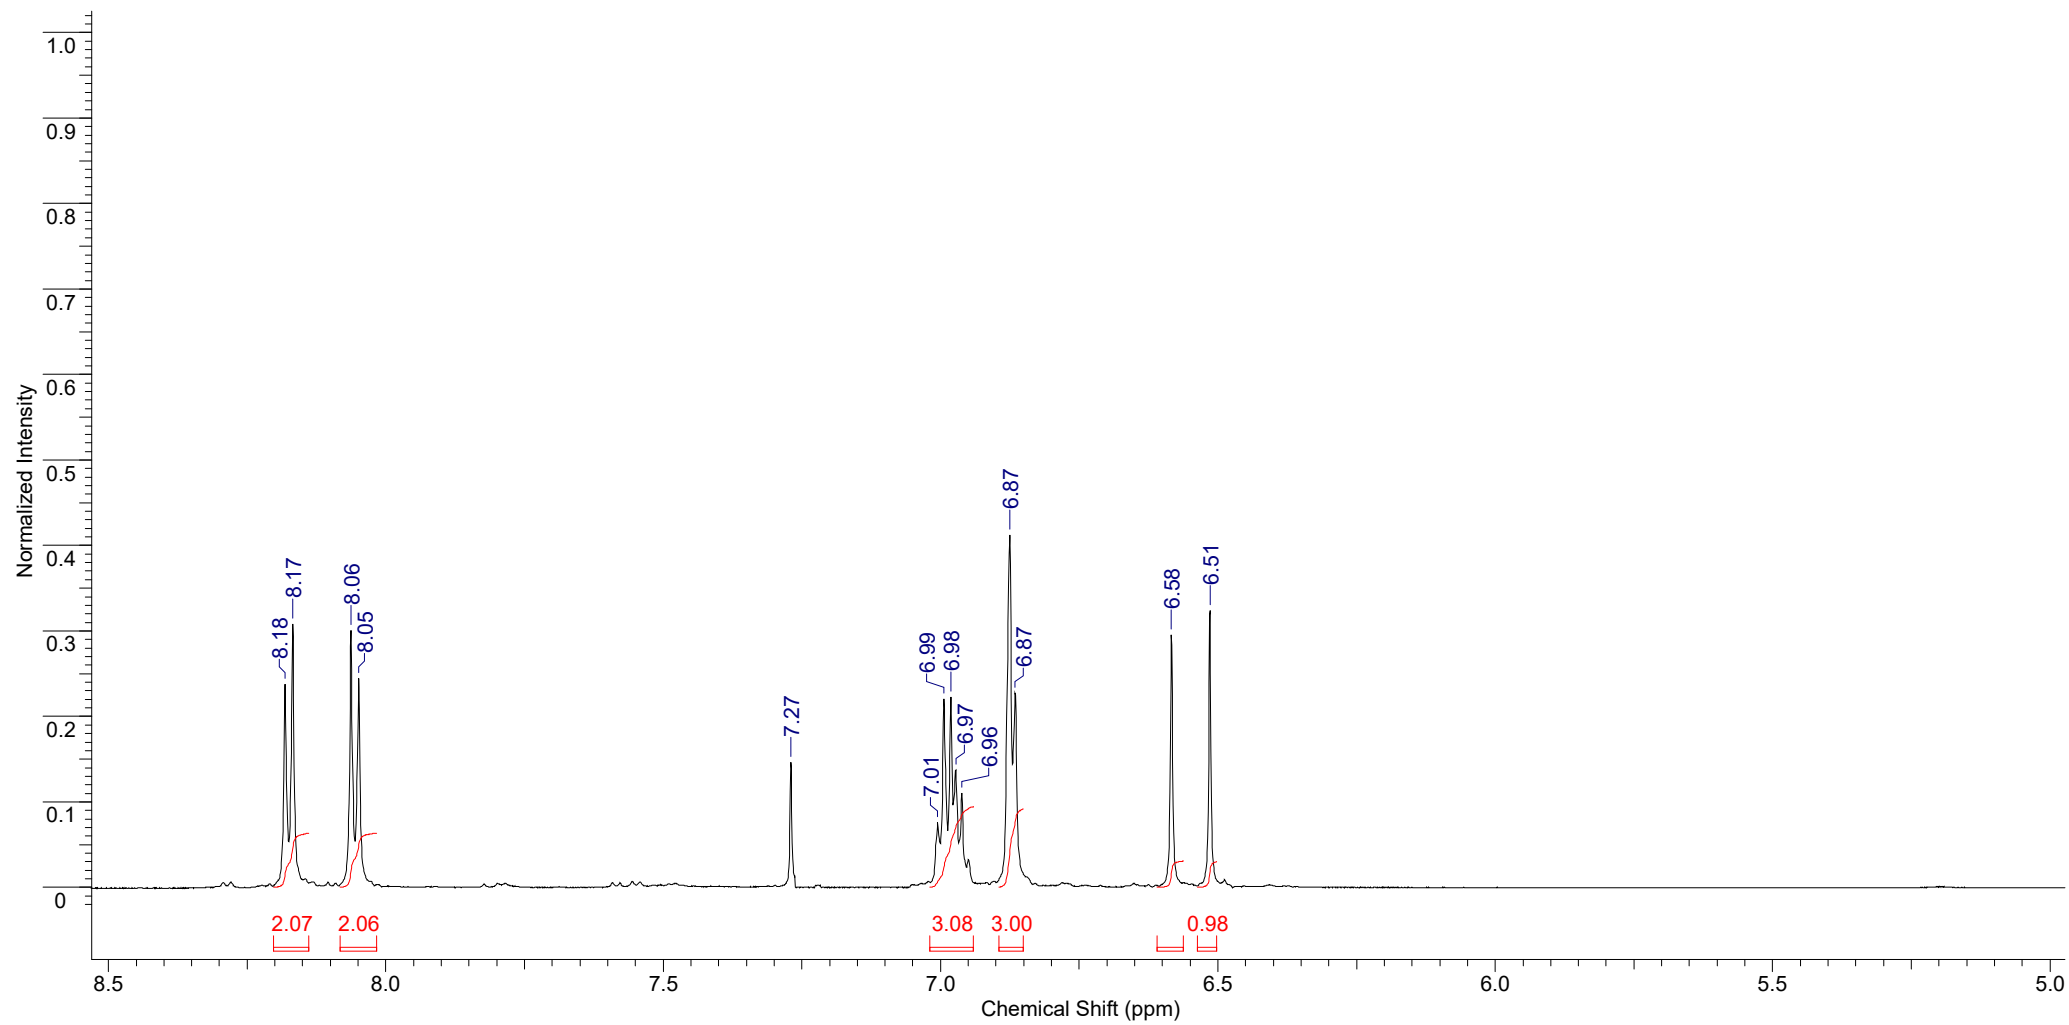

<sup>1</sup>H NMR spectra for 2t.

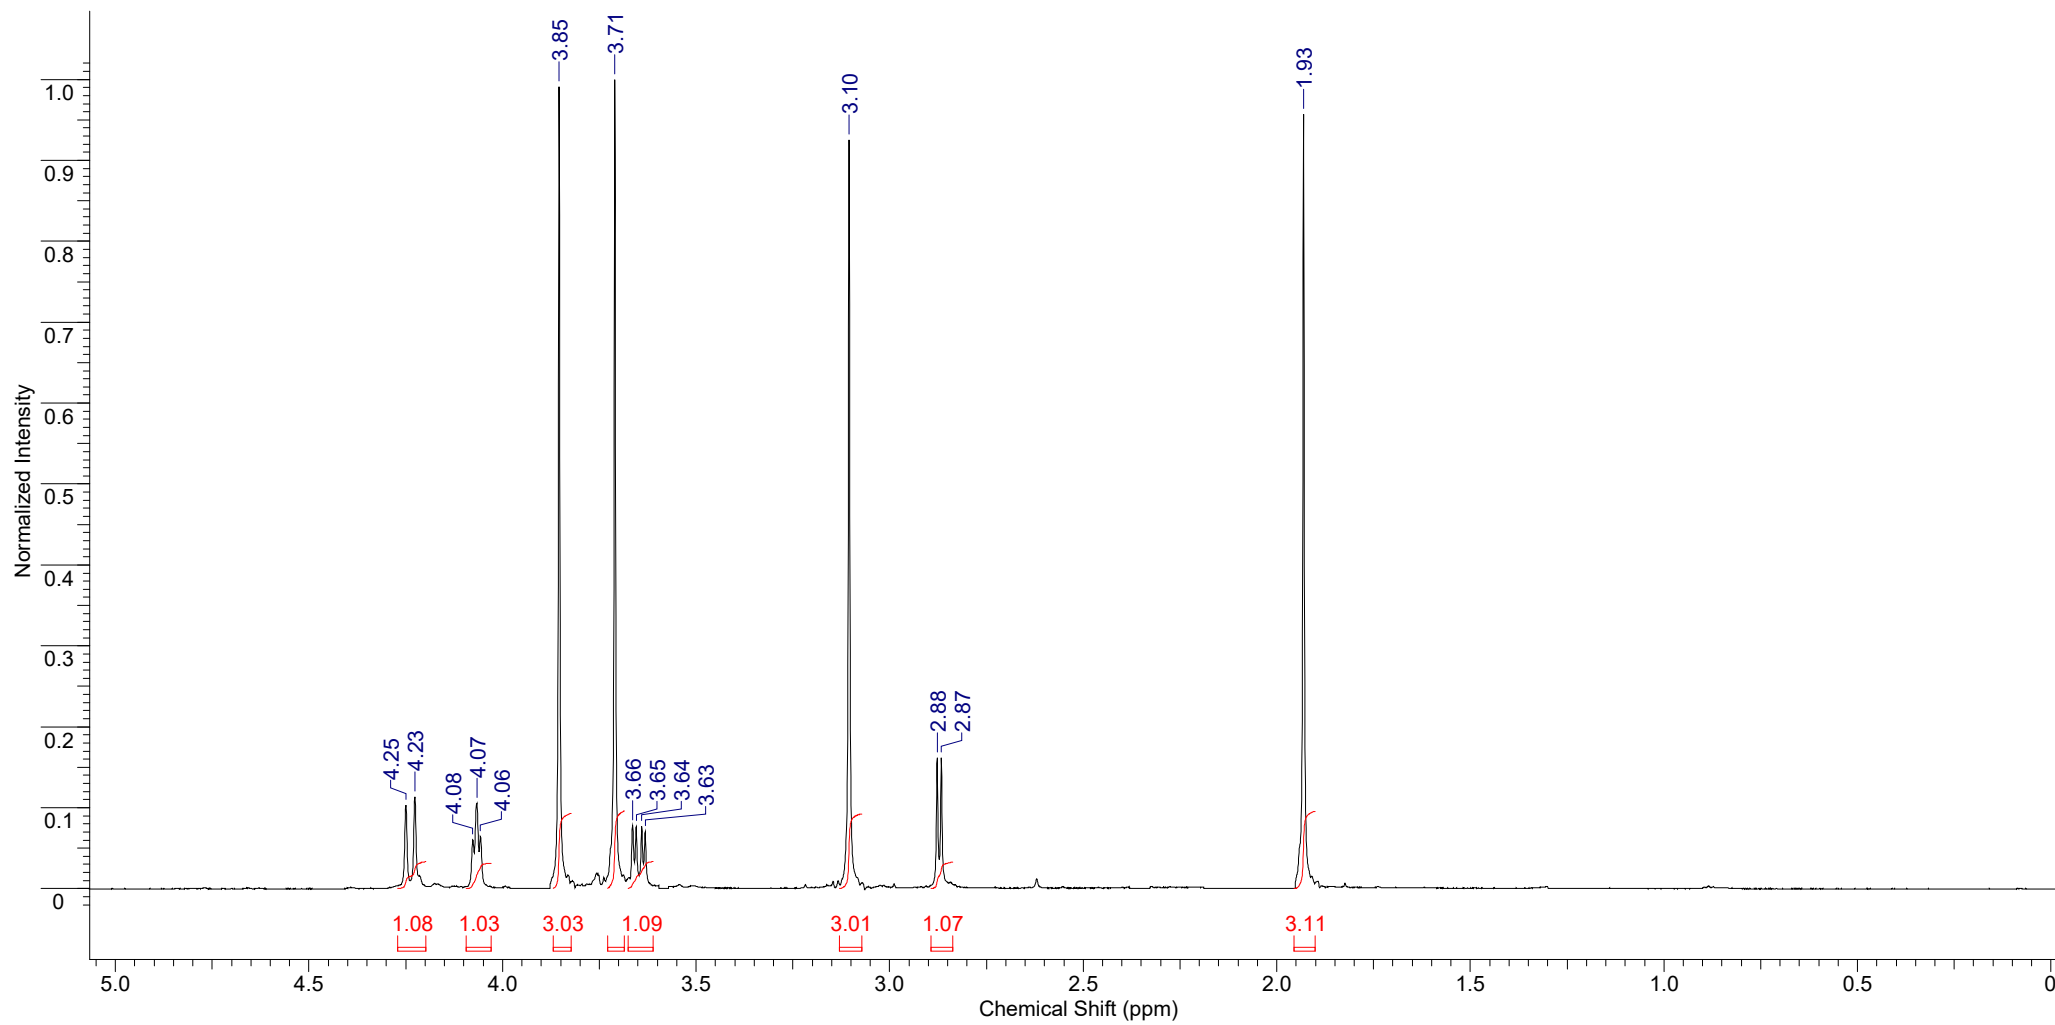



<sup>13</sup>C NMR spectra for 2t.

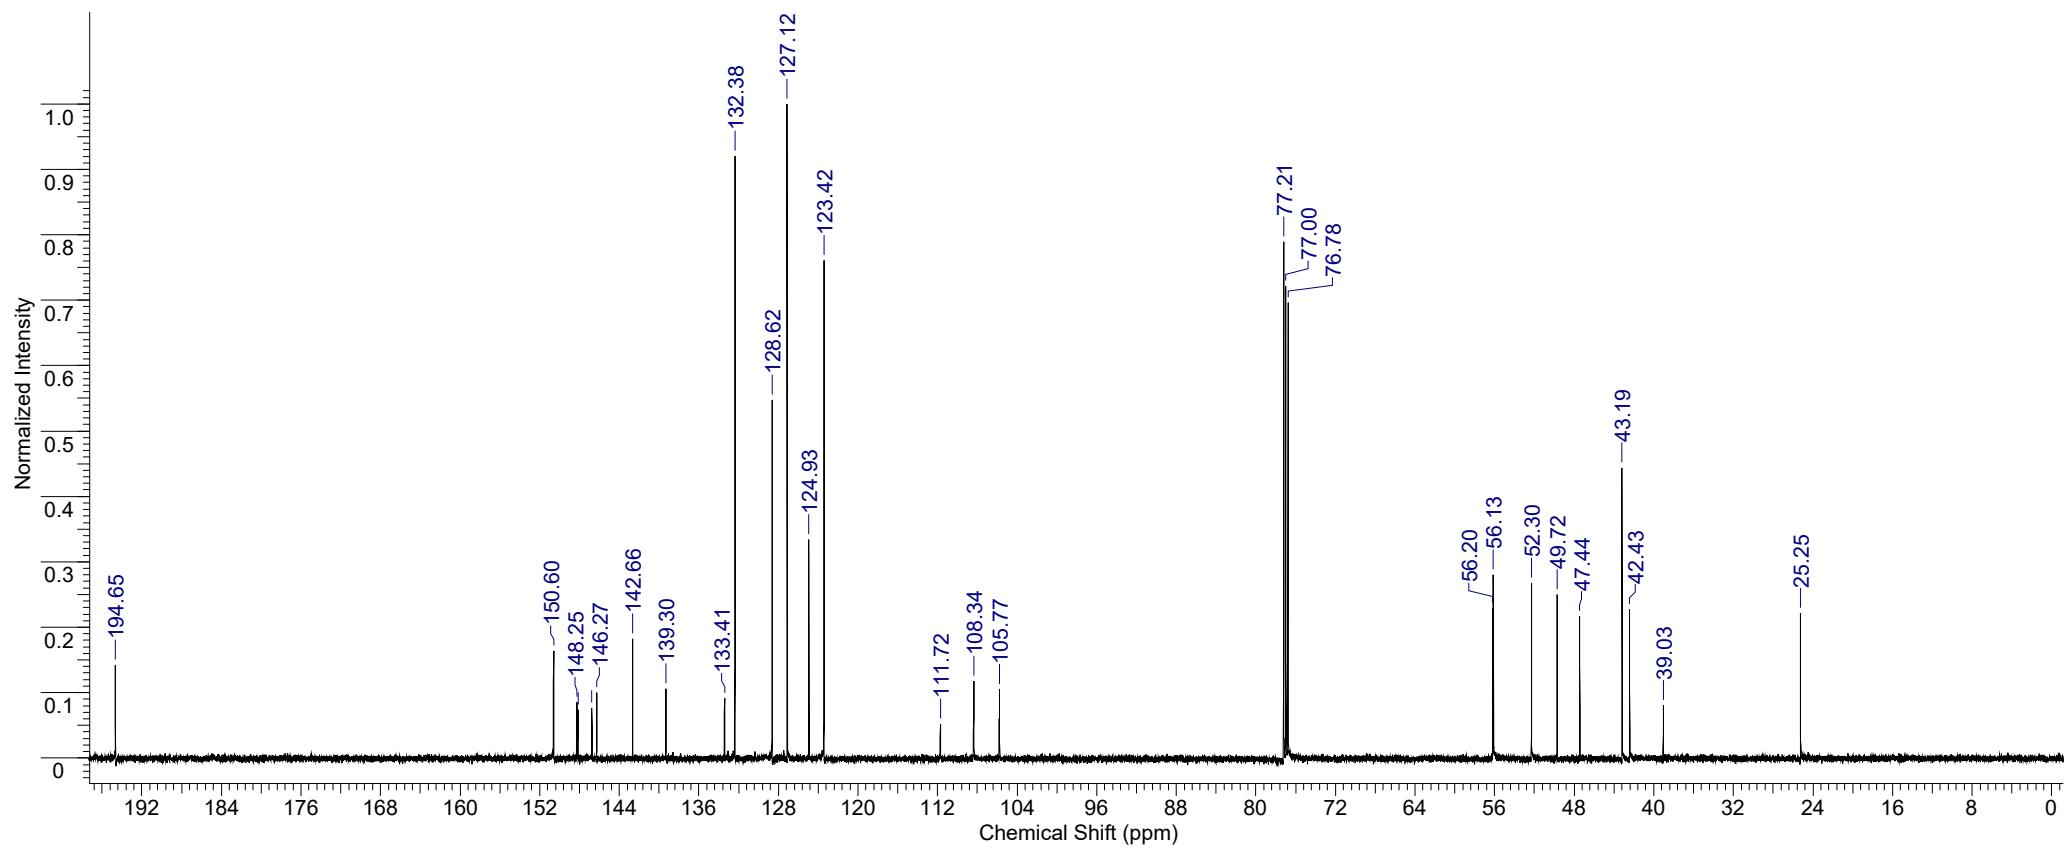

<sup>13</sup>C NMR spectra for 2t.

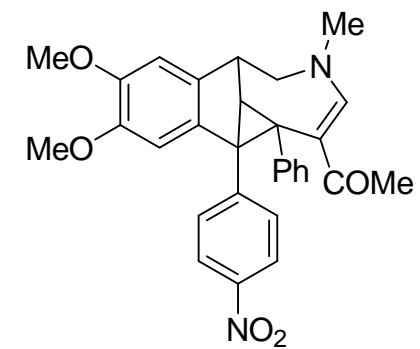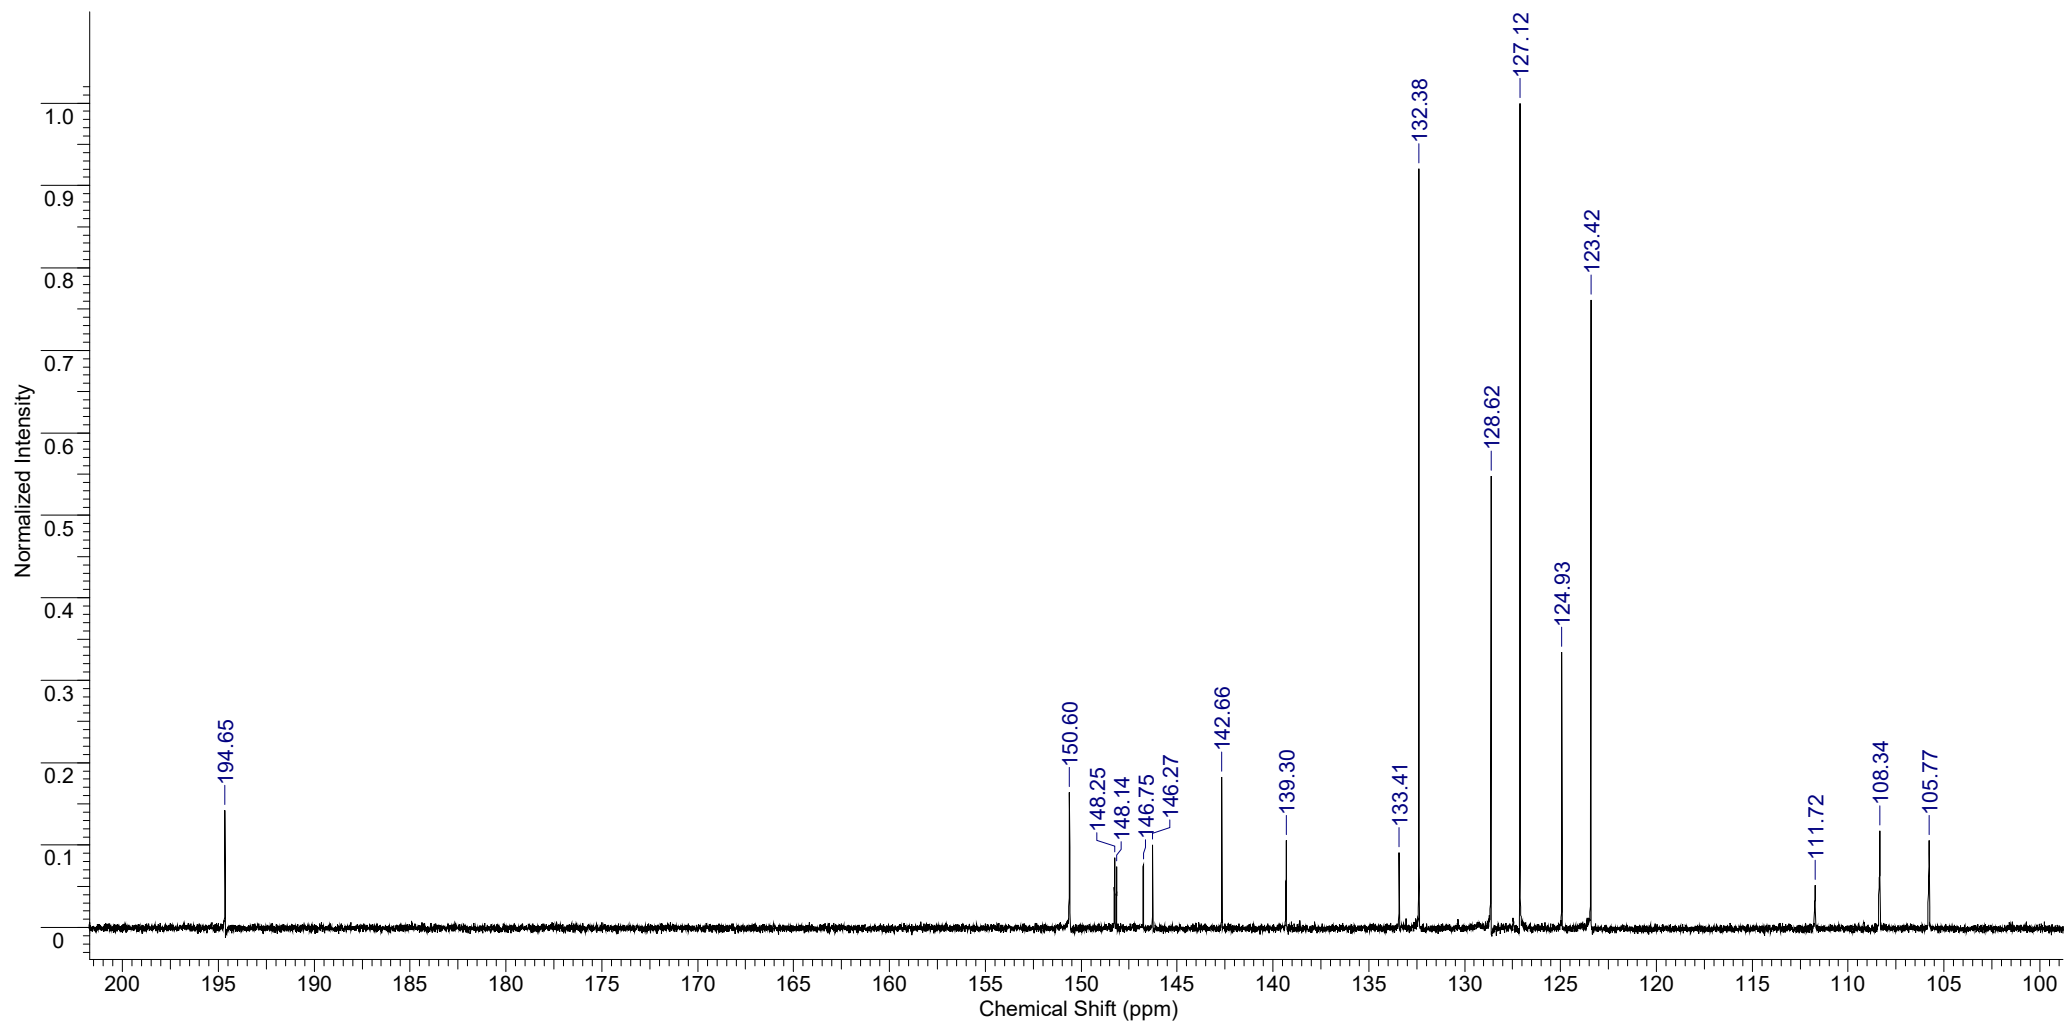

<sup>13</sup>C NMR spectra for 2t.

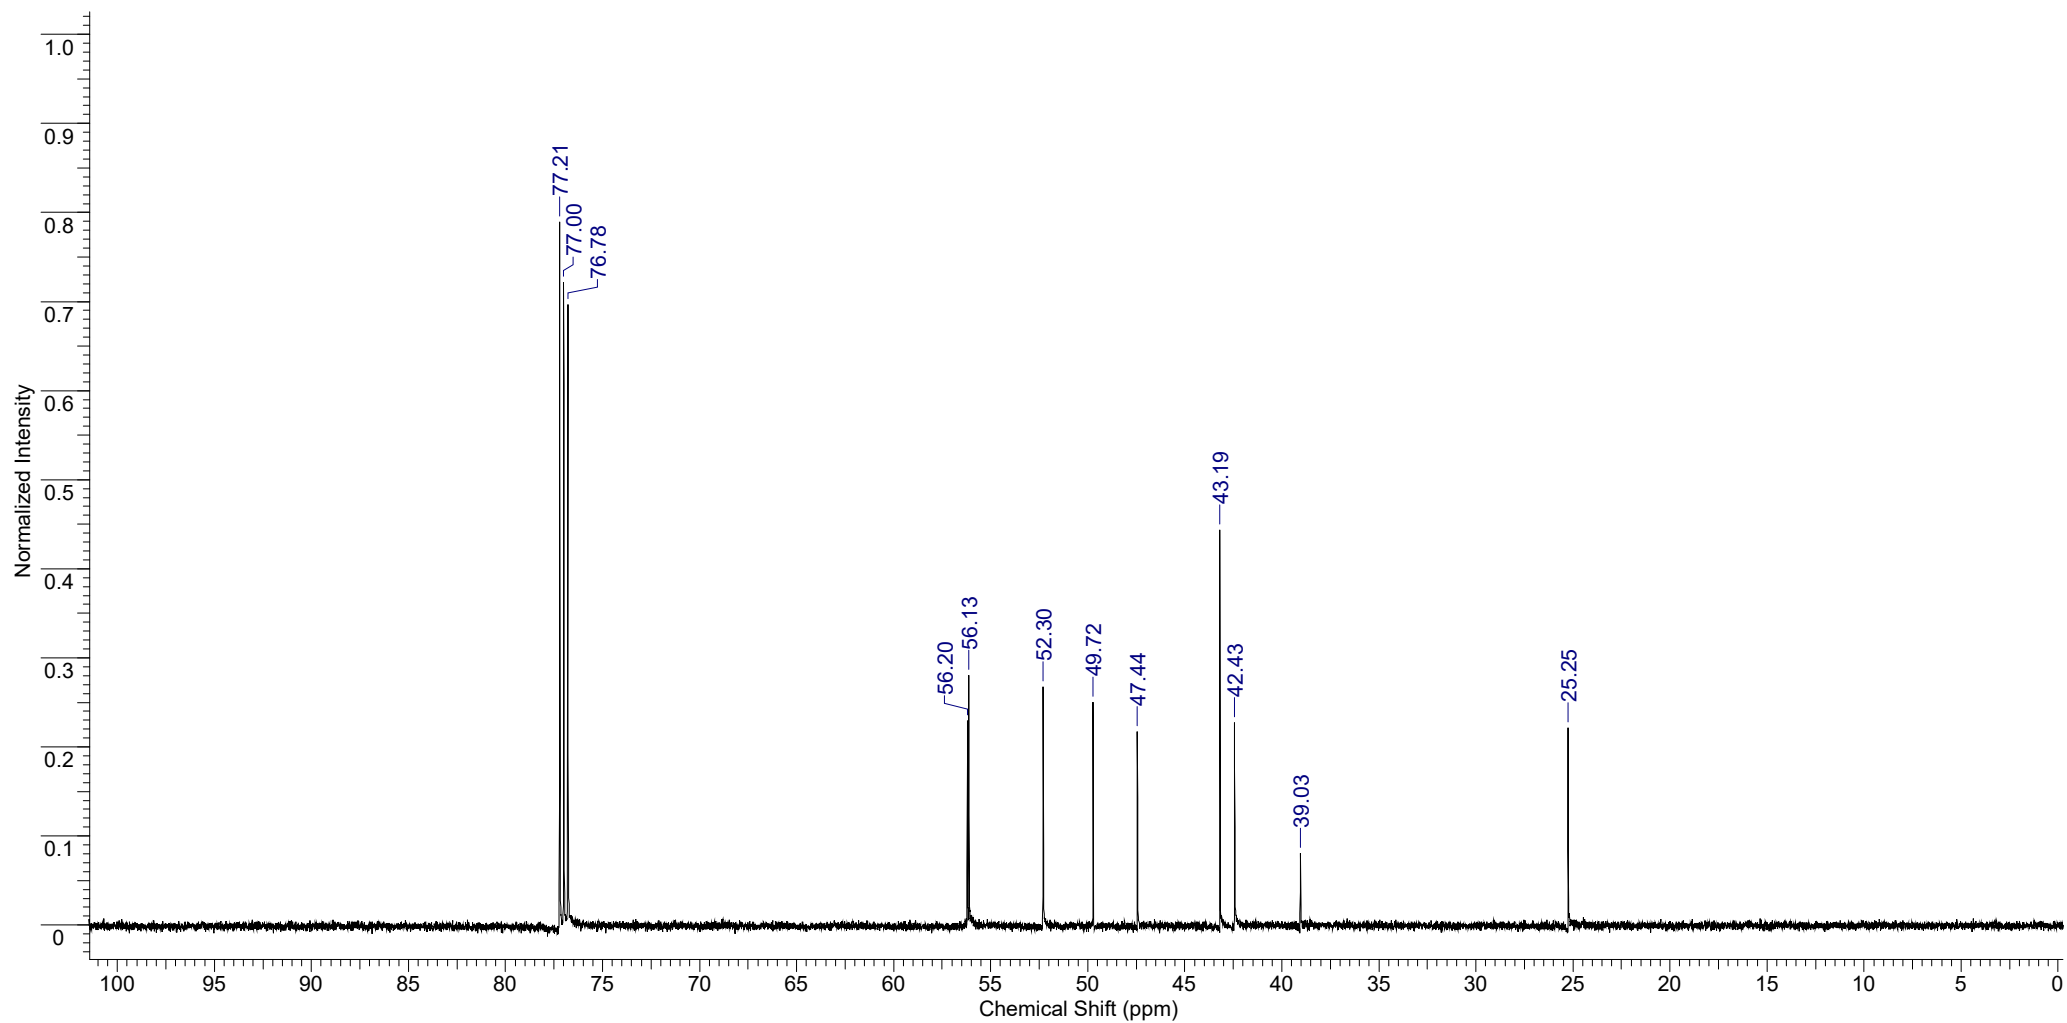

Supplement: d1gc04815e2.pdf [file d1gc04815e2.pdf]
